# Supplementary material
Source: PubMed Central journal article supplement (PMC4862404)

## Supporting Information

### Synthesis of Functionalized 1,3,2-Benzodiazaborole Cores Using Bench Stable Components

*Geraint H. M. Davies and Gary A. Molander\**

*Roy and Diana Vagelos Laboratories, University of Pennsylvania, 231 South 34<sup>th</sup> Street,  
Philadelphia, PA 19104-6323*

\*To whom correspondence should be addressed: [gmolandr@sas.upenn.edu](mailto:gmolandr@sas.upenn.edu)

#### Contents:

|                                      |     |
|--------------------------------------|-----|
| Bracketing pKa Studies .....         | S2  |
| Table of Computed Bond Lengths ..... | S3  |
| Computational Compounds .....        | S4  |
| NMR Spectra .....                    | S11 |

Bracketing pKa studies:

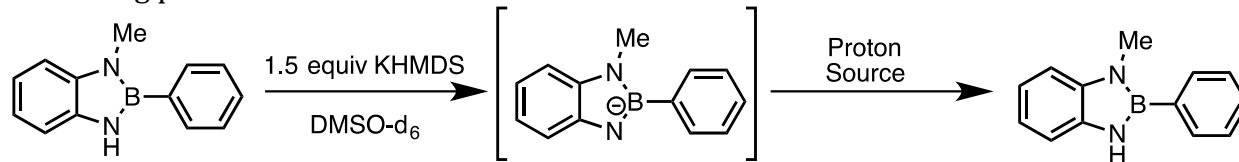

|                                                                                    | pKa<br>(DMSO) | Deprotonated? | Reference pKas                                                                               |
|------------------------------------------------------------------------------------|---------------|---------------|----------------------------------------------------------------------------------------------|
| 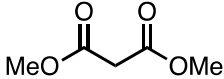  | 15.7          | Yes           | <br>20.95 |
|   | 17.2          | Yes           | <br>16.4  |
|   | 18.2          | 50/50         | <br>30   |
|   | 19.6          | No            |                                                                                              |
|  | 20.9          | No            |                                                                                              |

Table of Bond Lengths

| Name      | Structure | Bond Lengths (Angstroms) |       |       |       |       |       |       |       |       |       |       |       |       |
|-----------|-----------|--------------------------|-------|-------|-------|-------|-------|-------|-------|-------|-------|-------|-------|-------|
|           |           | 1-2                      | 2-3   | 3-4   | 4-5   | 5-6   | 6-7   | 7-8   | 8-9   | 4-9   | 9-1   | 1-10  | 2-11  | 3-12  |
| <b>2a</b> |           | 1.391                    | 1.358 | 1.398 | 1.361 | 1.367 | 1.425 | 1.374 | 1.502 | 1.460 | 1.441 | -     | 1.490 | -     |
| <b>2b</b> |           | 1.395                    | 1.360 | 1.395 | 1.360 | 1.367 | 1.425 | 1.375 | 1.503 | 1.459 | 1.441 | 1.449 | 1.491 | -     |
| <b>3</b>  |           | -                        | -     | 1.390 | 1.396 | 1.389 | 1.389 | 1.389 | 1.396 | 1.412 | 1.390 | -     | -     | -     |
| <b>5a</b> |           | 1.437                    | 1.437 | 1.393 | 1.388 | 1.395 | 1.395 | 1.395 | 1.388 | 1.410 | 1.393 | -     | 1.555 | -     |
| <b>6a</b> |           | 1.439                    | 1.438 | 1.392 | 1.387 | 1.395 | 1.395 | 1.395 | 1.388 | 1.411 | 1.392 | -     | 1.545 | -     |
| <b>6d</b> |           | 1.435                    | 1.435 | 1.395 | 1.388 | 1.394 | 1.396 | 1.394 | 1.388 | 1.411 | 1.392 | -     | 1.516 | -     |
| <b>7a</b> |           | 1.436                    | 1.437 | 1.394 | 1.387 | 1.395 | 1.395 | 1.395 | 1.387 | 1.410 | 1.395 | -     | 1.570 | -     |
| <b>7f</b> |           | 1.435                    | 1.439 | 1.395 | 1.388 | 1.397 | 1.394 | 1.396 | 1.386 | 1.411 | 1.393 | -     | 1.571 | 1.447 |
| <b>8a</b> |           | 1.385                    | 1.368 | 1.435 | 1.401 | 1.385 | 1.405 | 1.387 | 1.393 | 1.418 | 1.380 | -     | 1.491 | -     |
| <b>8b</b> |           | 1.391                    | 1.370 | 1.432 | 1.400 | 1.386 | 1.404 | 1.388 | 1.394 | 1.418 | 1.381 | 1.447 | 1.492 | -     |
| <b>8c</b> |           | 1.389                    | 1.372 | 1.441 | 1.401 | 1.386 | 1.404 | 1.387 | 1.393 | 1.416 | 1.377 | -     | 1.492 | 1.497 |
| <b>9</b>  |           | 1.380                    | 1.307 | 1.389 | 1.395 | 1.388 | 1.404 | 1.389 | 1.391 | 1.410 | 1.384 | -     | 1.490 | -     |

## Computational Compounds:

Atomic Coordinates for [B3LYP/6-311+G(2d,p)] optimized geometry value of total energy of 2-methyl "fused" BN-indole (**2a**)

| Center Number | Atomic Number | Atomic Type | Coordinates (Angstroms) |           |           |
|---------------|---------------|-------------|-------------------------|-----------|-----------|
|               |               |             | X                       | Y         | X         |
| 1             | 6             | 0           | 0.000000                | 0.000000  | 0.000000  |
| 2             | 6             | 0           | 0.000000                | 0.000000  | 1.490475  |
| 3             | 7             | 0           | 1.178547                | 0.000000  | 2.230146  |
| 4             | 5             | 0           | 0.860734                | -0.000407 | 3.635206  |
| 5             | 6             | 0           | 1.567411                | -0.000592 | 4.961107  |
| 6             | 6             | 0           | 0.768291                | -0.001067 | 6.079391  |
| 7             | 6             | 0           | -0.655215               | -0.001367 | 6.010606  |
| 8             | 6             | 0           | -1.311820               | -0.001203 | 4.812170  |
| 9             | 7             | 0           | -0.599500               | -0.000740 | 3.653037  |
| 10            | 6             | 0           | -1.064105               | -0.000518 | 2.334604  |
| 11            | 1             | 0           | -2.114133               | -0.000694 | 2.090567  |
| 12            | 1             | 0           | -2.392921               | -0.001426 | 4.737981  |
| 13            | 1             | 0           | -1.238601               | -0.001733 | 6.921783  |
| 14            | 1             | 0           | 1.215785                | -0.001229 | 7.069454  |
| 15            | 1             | 0           | 2.643916                | -0.000384 | 5.095247  |
| 16            | 1             | 0           | 2.074207                | 0.000495  | 1.773503  |
| 17            | 1             | 0           | -1.020462               | 0.000151  | -0.383250 |
| 18            | 1             | 0           | 0.509768                | -0.882814 | -0.398970 |
| 19            | 1             | 0           | 0.510065                | 0.882620  | -0.399061 |

E<sub>Tot</sub>: -406.713074625 Hartree

Atomic Coordinates for [B3LYP/6-311+G(2d,p)] optimized geometry value of total energy of 1,2-dimethyl "fused" BN-indole (**2b**)

| Center Number | Atomic Number | Atomic Type | Coordinates (Angstroms) |           |           |
|---------------|---------------|-------------|-------------------------|-----------|-----------|
|               |               |             | X                       | Y         | X         |
| 1             | 6             | 0           | -3.138225               | -0.847908 | 0.000167  |
| 2             | 6             | 0           | -1.668843               | -0.592351 | -0.000067 |
| 3             | 7             | 0           | -1.126480               | 0.693132  | 0.000175  |
| 4             | 5             | 0           | 0.309979                | 0.580185  | 0.000122  |
| 5             | 6             | 0           | 1.507881                | 1.488215  | 0.000171  |
| 6             | 6             | 0           | 2.738917                | 0.876037  | 0.000075  |
| 7             | 6             | 0           | 2.895337                | -0.540490 | -0.000091 |
| 8             | 6             | 0           | 1.815460                | -1.378101 | -0.000079 |
| 9             | 7             | 0           | 0.558633                | -0.857467 | -0.000004 |
| 10            | 6             | 0           | -0.670586               | -1.516467 | -0.000077 |
| 11            | 1             | 0           | -0.753647               | -2.591377 | -0.000140 |
| 12            | 1             | 0           | 1.912733                | -2.457423 | -0.000193 |
| 13            | 1             | 0           | 3.887176                | -0.972785 | -0.000201 |
| 14            | 1             | 0           | 3.645823                | 1.474384  | 0.000081  |
| 15            | 1             | 0           | 1.473492                | 2.572725  | 0.000271  |
| 16            | 6             | 0           | -1.935596               | 1.895488  | -0.000307 |
| 17            | 1             | 0           | -1.276740               | 2.762270  | -0.000456 |
| 18            | 1             | 0           | -2.573790               | 1.957170  | 0.886216  |
| 19            | 1             | 0           | -2.573621               | 1.956518  | -0.886874 |

|    |   |   |           |           |           |
|----|---|---|-----------|-----------|-----------|
| 20 | 1 | 0 | -3.331418 | -1.920638 | -0.000928 |
| 21 | 1 | 0 | -3.625174 | -0.419926 | 0.881854  |
| 22 | 1 | 0 | -3.625869 | -0.418037 | -0.880198 |

E<sub>Tot</sub>: -446.028825381 Hartree

Atomic Coordinates for [B3LYP/6-311+G(2d,p)] optimized geometry value of total energy of *o*-phenylenediamine (**3**)

| Center Number | Atomic Number | Atomic Type | Coordinates (Angstroms) |           |           |
|---------------|---------------|-------------|-------------------------|-----------|-----------|
|               |               |             | X                       | Y         | X         |
| 1             | 6             | 0           | 0.000000                | 0.000000  | 0.000000  |
| 2             | 6             | 0           | 0.000000                | 0.000000  | 1.389082  |
| 3             | 6             | 0           | 1.209633                | 0.000000  | 2.072587  |
| 4             | 6             | 0           | 2.432967                | 0.000000  | 1.400385  |
| 5             | 6             | 0           | 2.432967                | 0.000000  | -0.011303 |
| 6             | 6             | 0           | 1.209633                | 0.000000  | -0.683505 |
| 7             | 1             | 0           | 1.216069                | 0.000000  | -1.768950 |
| 8             | 7             | 0           | 3.622025                | 0.000000  | -0.730961 |
| 9             | 1             | 0           | 3.597916                | 0.000000  | -1.733809 |
| 10            | 1             | 0           | 4.525158                | 0.000000  | -0.300448 |
| 11            | 7             | 0           | 3.622025                | 0.000000  | 2.120043  |
| 12            | 1             | 0           | 4.525158                | 0.000000  | 1.689530  |
| 13            | 1             | 0           | 3.597916                | 0.000000  | 3.122891  |
| 14            | 1             | 0           | 1.216069                | 0.000000  | 3.158032  |
| 15            | 1             | 0           | -0.930979               | 0.000000  | 1.942111  |
| 16            | 1             | 0           | -0.930979               | 0.000000  | -0.553029 |
| 17            | 0             | 0           | 1.214200                | 0.000000  | 0.694541  |
| 18            | 0             | 0           | 1.214200                | 1.000000  | 0.694541  |
| 19            | 0             | 0           | 1.214200                | -1.000000 | 0.694540  |

E<sub>Tot</sub>: -343.061786471 Hartree

Atomic Coordinates for [B3LYP/6-311+G(2d,p)] optimized geometry value of total energy of 2-phenyl-2,3-dihydro-1*H*-1,3,2-benzodiazaborole (**5a**)

| Center Number | Atomic Number | Atomic Type | Coordinates (Angstroms) |           |           |
|---------------|---------------|-------------|-------------------------|-----------|-----------|
|               |               |             | X                       | Y         | X         |
| 1             | 6             | 0           | 4.305261                | 0.690310  | -0.101690 |
| 2             | 6             | 0           | 3.109330                | 1.400448  | -0.204267 |
| 3             | 6             | 0           | 1.917291                | 0.698103  | -0.099649 |
| 4             | 6             | 0           | 1.917338                | -0.698092 | 0.099884  |
| 5             | 6             | 0           | 3.109442                | -1.400383 | 0.204128  |
| 6             | 6             | 0           | 4.305310                | -0.690220 | 0.101033  |
| 7             | 1             | 0           | 5.246890                | -1.219847 | 0.178860  |
| 8             | 1             | 0           | 3.112788                | -2.473298 | 0.359247  |
| 9             | 7             | 0           | 0.592388                | -1.125573 | 0.155726  |
| 10            | 5             | 0           | -0.286691               | -0.000039 | 0.000328  |
| 11            | 7             | 0           | 0.592328                | 1.125521  | -0.155165 |
| 12            | 1             | 0           | 0.364934                | 2.088169  | -0.337085 |
| 13            | 6             | 0           | -1.842093               | -0.000064 | 0.000335  |
| 14            | 6             | 0           | -2.572608               | -1.170387 | -0.256590 |
| 15            | 6             | 0           | -3.962543               | -1.174483 | -0.258884 |

|    |   |   |           |           |           |
|----|---|---|-----------|-----------|-----------|
| 16 | 6 | 0 | -4.662436 | -0.000008 | -0.000514 |
| 17 | 6 | 0 | -3.962551 | 1.174552  | 0.258471  |
| 18 | 6 | 0 | -2.572710 | 1.170300  | 0.257045  |
| 19 | 1 | 0 | -2.047631 | 2.094775  | 0.474093  |
| 20 | 1 | 0 | -4.500848 | 2.092542  | 0.464417  |
| 21 | 1 | 0 | -5.746151 | 0.000117  | -0.001361 |
| 22 | 1 | 0 | -4.500822 | -2.092527 | -0.464638 |
| 23 | 1 | 0 | -2.047451 | -2.094896 | -0.473357 |
| 24 | 1 | 0 | 0.365234  | -2.088232 | 0.337905  |
| 25 | 1 | 0 | 3.112536  | 2.473327  | -0.359644 |
| 26 | 1 | 0 | 5.246796  | 1.219974  | -0.179824 |

E<sub>Tot</sub>: -598.536528558 Hartree

Atomic Coordinates for [B3LYP/6-311+G(2d,p)] optimized geometry value of total energy of 2-vinyl-2,3-dihydro-1*H*-1,3,2-benzodiazaborole (**6a**)

| Center Number | Atomic Number | Atomic Type | Coordinates (Angstroms) |           |           |
|---------------|---------------|-------------|-------------------------|-----------|-----------|
|               |               |             | X                       | Y         | X         |
| 1             | 6             | 0           | 0.000000                | 0.000000  | 0.000000  |
| 2             | 6             | 0           | 0.000000                | 0.000000  | 1.389848  |
| 3             | 6             | 0           | 1.195837                | 0.000000  | 2.124305  |
| 4             | 5             | 0           | 1.190825                | -0.000528 | 3.679699  |
| 5             | 7             | 0           | 0.121818                | 0.391972  | 4.555430  |
| 6             | 6             | 0           | 0.523195                | 0.245797  | 5.881637  |
| 7             | 6             | 0           | -0.144301               | 0.497908  | 7.071628  |
| 8             | 6             | 0           | 0.523585                | 0.245294  | 8.269621  |
| 9             | 6             | 0           | 1.828723                | -0.248222 | 8.273685  |
| 10            | 6             | 0           | 2.504194                | -0.500516 | 7.079890  |
| 11            | 6             | 0           | 1.844319                | -0.247955 | 5.885750  |
| 12            | 7             | 0           | 2.254188                | -0.393541 | 4.562058  |
| 13            | 1             | 0           | 3.156267                | -0.777468 | 4.337662  |
| 14            | 1             | 0           | 3.519026                | -0.881690 | 7.086359  |
| 15            | 1             | 0           | 2.326394                | -0.437935 | 9.216800  |
| 16            | 1             | 0           | 0.019902                | 0.434659  | 9.209610  |
| 17            | 1             | 0           | -1.159063               | 0.879324  | 7.071712  |
| 18            | 1             | 0           | -0.778848               | 0.775802  | 4.325280  |
| 19            | 1             | 0           | 1.973428                | 0.145330  | 1.809187  |
| 20            | 1             | 0           | -0.951187               | -0.014325 | 1.911874  |
| 21            | 1             | 0           | -0.939065               | -0.004498 | -0.541313 |
| 22            | 1             | 0           | 0.764661                | 0.157912  | -0.400065 |
| 23            | 1             | 0           | 0.106870                | 0.116889  | -0.855962 |

E<sub>Tot</sub>: -484.170539338 Hartree

Atomic Coordinates for [B3LYP/6-311+G(2d,p)] optimized geometry value of total energy of 2-(1-propynyl)-2,3-dihydro-1*H*-1,3,2-benzodiazaborole (**6d**)

| Center Number | Atomic Number | Atomic Type | Coordinates (Angstroms) |           |          |
|---------------|---------------|-------------|-------------------------|-----------|----------|
|               |               |             | X                       | Y         | X        |
| 1             | 6             | 0           | 0.000000                | 0.000000  | 0.000000 |
| 2             | 6             | 0           | 1.523352                | -0.225828 | 0.000000 |
| 3             | 6             | 0           | 2.711567                | -0.401973 | 0.000000 |

|    |   |   |           |           |           |
|----|---|---|-----------|-----------|-----------|
| 4  | 5 | 0 | 4.234919  | -0.627801 | 0.000000  |
| 5  | 7 | 0 | 5.120374  | 0.488071  | 0.000000  |
| 6  | 6 | 0 | 6.455252  | -0.009223 | 0.000000  |
| 7  | 6 | 0 | 7.718021  | 0.650030  | 0.000000  |
| 8  | 6 | 0 | 8.920335  | -0.113934 | 0.000000  |
| 9  | 6 | 0 | 8.859880  | -1.537151 | 0.000000  |
| 10 | 6 | 0 | 7.597111  | -2.196404 | 0.000000  |
| 11 | 6 | 0 | 6.394797  | -1.432440 | 0.000000  |
| 12 | 7 | 0 | 5.022556  | -1.814742 | 0.000000  |
| 13 | 1 | 0 | 4.750888  | -2.870344 | 0.000000  |
| 14 | 1 | 0 | 7.550852  | -3.285421 | 0.000000  |
| 15 | 1 | 0 | 9.779868  | -2.121721 | 0.000000  |
| 16 | 1 | 0 | 9.886582  | 0.390513  | 0.000000  |
| 17 | 1 | 0 | 7.764280  | 1.739048  | 0.000000  |
| 18 | 1 | 0 | 4.942527  | 1.543187  | 0.000000  |
| 19 | 1 | 0 | -0.208708 | 1.069832  | 0.000000  |
| 20 | 1 | 0 | -0.434754 | -0.454997 | -0.889981 |
| 21 | 1 | 0 | -0.434754 | -0.454997 | 0.889981  |

E<sub>Tot</sub>: -482.932836614 Hartree

Atomic Coordinates for [B3LYP/6-311+G(2d,p)] optimized geometry value of total energy of 2-methyl-2,3-dihydro-1*H*-1,3,2-benzodiazaborole (**7a**)

| Center Number | Atomic Number | Atomic Type | Coordinates (Angstroms) |           |           |
|---------------|---------------|-------------|-------------------------|-----------|-----------|
|               |               |             | X                       | Y         | Z         |
| 1             | 6             | 0           | 0.000000                | 0.000000  | 0.000000  |
| 2             | 5             | 0           | 0.000000                | 0.000000  | 1.570050  |
| 3             | 7             | 0           | 1.132880                | 0.000000  | 2.451855  |
| 4             | 6             | 0           | 0.702979                | 0.007694  | 3.778662  |
| 5             | 6             | 0           | 1.411869                | 0.010963  | 4.970647  |
| 6             | 6             | 0           | 0.694015                | 0.018463  | 6.167164  |
| 7             | 6             | 0           | -0.700640               | 0.022269  | 6.166076  |
| 8             | 6             | 0           | -1.417294               | 0.018622  | 4.968836  |
| 9             | 6             | 0           | -0.707237               | 0.011441  | 3.777358  |
| 10            | 7             | 0           | -1.136160               | 0.005994  | 2.450577  |
| 11            | 1             | 0           | -2.115342               | 0.006976  | 2.220250  |
| 12            | 1             | 0           | -2.501460               | 0.021511  | 4.971694  |
| 13            | 1             | 0           | -1.237177               | 0.028100  | 7.107008  |
| 14            | 1             | 0           | 1.229335                | 0.021315  | 7.108779  |
| 15            | 1             | 0           | 2.496030                | 0.007902  | 4.974567  |
| 16            | 1             | 0           | 2.111719                | -0.004322 | 2.220184  |
| 17            | 1             | 0           | 1.007039                | -0.082904 | -0.415749 |
| 18            | 1             | 0           | -0.588248               | -0.829424 | -0.404610 |
| 19            | 1             | 0           | -0.439947               | 0.919343  | -0.399934 |

E<sub>Tot</sub>: -406.749628439 Hartree

Atomic Coordinates for [B3LYP/6-311+G(2d,p)] optimized geometry value of total energy of 1,2-dimethyl-2,3-dihydro-1*H*-1,3,2-benzodiazaborole (**7f**)

| Center Number | Atomic Number | Atomic Type | Coordinates (Angstroms) |           |          |
|---------------|---------------|-------------|-------------------------|-----------|----------|
|               |               |             | X                       | Y         | X        |
| 1             | 6             | 0           | 0.000000                | 0.000000  | 0.000000 |
| 2             | 7             | 0           | 0.000000                | 0.000000  | 1.447194 |
| 3             | 6             | 0           | 1.186373                | 0.000000  | 2.181121 |
| 4             | 6             | 0           | 2.510522                | 0.000148  | 1.763908 |
| 5             | 6             | 0           | 3.511180                | 0.000095  | 2.738108 |
| 6             | 6             | 0           | 3.192365                | -0.000070 | 4.094778 |
| 7             | 6             | 0           | 1.861896                | -0.000177 | 4.518569 |
| 8             | 6             | 0           | 0.865526                | -0.000156 | 3.555443 |
| 9             | 7             | 0           | -0.522603               | -0.000152 | 3.667934 |
| 10            | 5             | 0           | -1.113008               | -0.000194 | 2.359503 |
| 11            | 6             | 0           | -2.642963               | -0.000360 | 2.002118 |
| 12            | 1             | 0           | -3.273383               | 0.000228  | 2.894624 |
| 13            | 1             | 0           | -2.922468               | -0.878257 | 1.410722 |
| 14            | 1             | 0           | -2.922440               | 0.876775  | 1.409604 |
| 15            | 1             | 0           | -0.975141               | -0.000875 | 4.566126 |
| 16            | 1             | 0           | 1.616193                | -0.000280 | 5.574573 |
| 17            | 1             | 0           | 3.985748                | -0.000106 | 4.832218 |
| 18            | 1             | 0           | 4.550284                | 0.000192  | 2.432030 |
| 19            | 1             | 0           | 2.767270                | 0.000293  | 0.711663 |

E<sub>Tot</sub>: -446.067218958 Hartree

Atomic Coordinates for [B3LYP/6-311+G(2d,p)] optimized geometry value of total energy of 2-methylindole (**8a**)

| Center Number | Atomic Number | Atomic Type | Coordinates (Angstroms) |           |           |
|---------------|---------------|-------------|-------------------------|-----------|-----------|
|               |               |             | X                       | Y         | X         |
| 1             | 6             | 0           | -3.265731               | -0.995310 | 0.000000  |
| 2             | 6             | 0           | -1.811961               | -0.664456 | 0.000000  |
| 3             | 7             | 0           | -1.379781               | 0.651756  | 0.000000  |
| 4             | 6             | 0           | 0.000000                | 0.690478  | 0.000000  |
| 5             | 6             | 0           | 0.877004                | 1.772516  | 0.000000  |
| 6             | 6             | 0           | 2.236358                | 1.496480  | 0.000000  |
| 7             | 6             | 0           | 2.709076                | 0.173424  | 0.000000  |
| 8             | 6             | 0           | 1.832696                | -0.899535 | 0.000000  |
| 9             | 6             | 0           | 0.453772                | -0.652869 | 0.000000  |
| 10            | 6             | 0           | -0.716363               | -1.484192 | 0.000000  |
| 11            | 1             | 0           | -0.745252               | -2.562619 | 0.000000  |
| 12            | 1             | 0           | 2.208705                | -1.916307 | 0.000000  |
| 13            | 1             | 0           | 3.777583                | -0.006086 | 0.000000  |
| 14            | 1             | 0           | 2.945626                | 2.315428  | 0.000000  |
| 15            | 1             | 0           | 0.515284                | 2.794568  | 0.000000  |
| 16            | 1             | 0           | -1.984724               | 1.455268  | 0.000000  |
| 17            | 1             | 0           | -3.403294               | -2.076129 | 0.000000  |
| 18            | 1             | 0           | -3.772288               | -0.592815 | 0.883136  |
| 19            | 1             | 0           | -3.772288               | -0.592815 | -0.883136 |

E<sub>Tot</sub>: -403.255153596 Hartree



Atomic Coordinates for [B3LYP/6-311+G(2d,p)] optimized geometry value of total energy of 1,2-dimethylindole (**8b**)

| Center Number | Atomic Number | Atomic Type | Coordinates (Angstroms) |           |           |
|---------------|---------------|-------------|-------------------------|-----------|-----------|
|               |               |             | X                       | Y         | X         |
| 1             | 6             | 0           | 0.000000                | 0.000000  | 0.000000  |
| 2             | 7             | 0           | 0.000000                | 0.000000  | 1.446886  |
| 3             | 6             | 0           | 1.143486                | 0.000000  | 2.221924  |
| 4             | 6             | 0           | 2.484512                | 0.000000  | 1.840093  |
| 5             | 6             | 0           | 3.439585                | 0.000000  | 2.847209  |
| 6             | 6             | 0           | 3.067843                | 0.000000  | 4.201432  |
| 7             | 6             | 0           | 1.733626                | 0.000000  | 4.576652  |
| 8             | 6             | 0           | 0.747057                | 0.000000  | 3.583494  |
| 9             | 6             | 0           | -0.684573               | 0.000000  | 3.589409  |
| 10            | 6             | 0           | -1.108473               | 0.000000  | 2.287135  |
| 11            | 6             | 0           | -2.504481               | 0.000000  | 1.760522  |
| 12            | 1             | 0           | -3.205295               | 0.000000  | 2.594814  |
| 13            | 1             | 0           | -2.715960               | 0.882923  | 1.149127  |
| 14            | 1             | 0           | -2.715960               | -0.882923 | 1.149127  |
| 15            | 1             | 0           | -1.331253               | 0.000000  | 4.452860  |
| 16            | 1             | 0           | 1.457590                | 0.000000  | 5.625061  |
| 17            | 1             | 0           | 3.839580                | 0.000000  | 4.962008  |
| 18            | 1             | 0           | 4.490434                | 0.000000  | 2.583395  |
| 19            | 1             | 0           | 2.779744                | 0.000000  | 0.797678  |
| 20            | 1             | 0           | -1.022819               | 0.000000  | -0.368852 |
| 21            | 1             | 0           | 0.505664                | 0.887466  | -0.390757 |
| 22            | 1             | 0           | 0.505664                | -0.887466 | -0.390757 |

E<sub>Tot</sub>: -442.573440367 Hartree

Atomic Coordinates for [B3LYP/6-311+G(2d,p)] optimized geometry value of total energy of 2,3-dimethylindole (**8c**)

| Center Number | Atomic Number | Atomic Type | Coordinates (Angstroms) |           |           |
|---------------|---------------|-------------|-------------------------|-----------|-----------|
|               |               |             | X                       | Y         | X         |
| 1             | 6             | 0           | 3.131834                | -0.914686 | 0.000102  |
| 2             | 6             | 0           | 1.697530                | -0.504982 | -0.000124 |
| 3             | 7             | 0           | 0.701867                | -1.473723 | -0.000500 |
| 4             | 6             | 0           | -0.535576               | -0.869224 | -0.000063 |
| 5             | 6             | 0           | -1.815800               | -1.417436 | 0.000110  |
| 6             | 6             | 0           | -2.890427               | -0.539754 | 0.000197  |
| 7             | 6             | 0           | -2.692101               | 0.850635  | 0.000025  |
| 8             | 6             | 0           | -1.415245               | 1.390731  | -0.000174 |
| 9             | 6             | 0           | -0.310913               | 0.529221  | -0.000136 |
| 10            | 6             | 0           | 1.114781                | 0.737625  | -0.000237 |
| 11            | 6             | 0           | 1.793369                | 2.071535  | 0.000255  |
| 12            | 1             | 0           | 1.517513                | 2.661017  | 0.880465  |
| 13            | 1             | 0           | 2.879997                | 1.975624  | -0.000030 |
| 14            | 1             | 0           | 1.517080                | 2.661977  | -0.879231 |
| 15            | 1             | 0           | -1.276651               | 2.465967  | -0.000308 |
| 16            | 1             | 0           | -3.553252               | 1.508199  | 0.000045  |
| 17            | 1             | 0           | -3.899557               | -0.934033 | 0.000366  |

|    |   |   |           |           |           |
|----|---|---|-----------|-----------|-----------|
| 18 | 1 | 0 | -1.971576 | -2.490424 | 0.000145  |
| 19 | 1 | 0 | 0.866614  | -2.465659 | 0.001913  |
| 20 | 1 | 0 | 3.783282  | -0.042213 | -0.002685 |
| 21 | 1 | 0 | 3.380016  | -1.510823 | 0.884495  |
| 22 | 1 | 0 | 3.378751  | -1.515558 | -0.881407 |

E<sub>Tot</sub>: -442.573440367 Hartree

Atomic Coordinates for [B3LYP/6-311+G(2d,p)] optimized geometry value of total energy of 2-methylbenzimidazole (**9**)

| Center Number | Atomic Number | Atomic Type | Coordinates (Angstroms) |           |           |
|---------------|---------------|-------------|-------------------------|-----------|-----------|
|               |               |             | X                       | Y         | X         |
| 1             | 6             | 0           | 0.000000                | 0.000000  | 0.000000  |
| 2             | 6             | 0           | 0.000000                | 0.000000  | 1.489979  |
| 3             | 7             | 0           | 1.169044                | 0.000000  | 2.223021  |
| 4             | 6             | 0           | 0.817737                | -0.000007 | 3.561390  |
| 5             | 6             | 0           | 1.559842                | 0.000019  | 4.737512  |
| 6             | 6             | 0           | 0.845000                | -0.000008 | 5.928595  |
| 7             | 6             | 0           | -0.559207               | -0.000058 | 5.940137  |
| 8             | 6             | 0           | -1.291790               | -0.000074 | 4.761740  |
| 9             | 6             | 0           | -0.592446               | -0.000049 | 3.554920  |
| 10            | 7             | 0           | -1.064197               | -0.000031 | 2.248840  |
| 11            | 1             | 0           | -2.374704               | -0.000087 | 4.766707  |
| 12            | 1             | 0           | -1.077515               | -0.000077 | 6.891424  |
| 13            | 1             | 0           | 1.382881                | 0.000005  | 6.868924  |
| 14            | 1             | 0           | 2.643472                | 0.000067  | 4.734306  |
| 15            | 1             | 0           | 2.102780                | 0.000114  | 1.847164  |
| 16            | 1             | 0           | 0.505834                | 0.883738  | -0.399361 |
| 17            | 1             | 0           | 0.505645                | -0.883856 | -0.399338 |
| 18            | 1             | 0           | -1.029667               | 0.000111  | -0.351102 |

E<sub>Tot</sub>: -419.31208368 Hartree

NMR Data:

$^1\text{H}$  NMR (500.4 MHz,  $\text{CDCl}_3$ ) of 2-Phenyl-2,3-dihydro-1*H*-1,3,2-benzodiazaborole (**5a**)

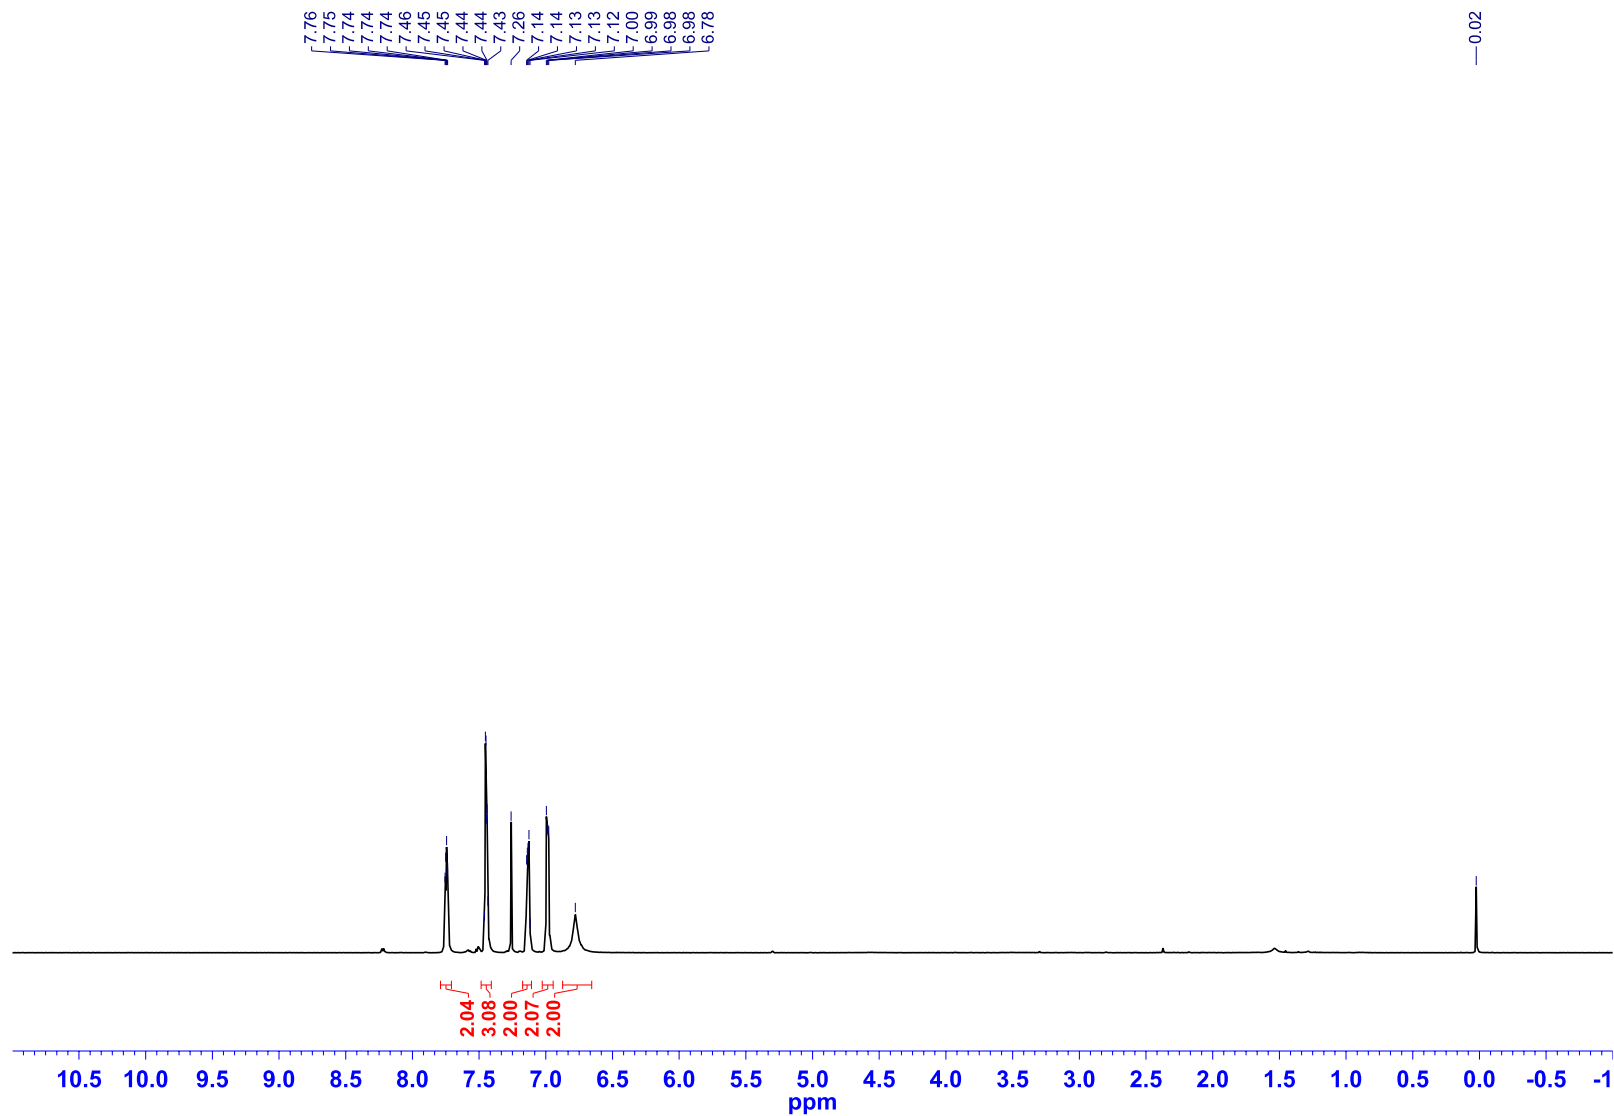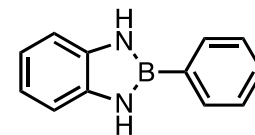

$^{13}\text{C}$  NMR (125.8 MHz,  $\text{CDCl}_3$ ) of 2-Phenyl-2,3-dihydro-1*H*-1,3,2-benzodiazaborole (**5a**)

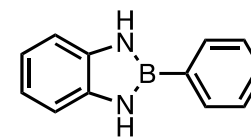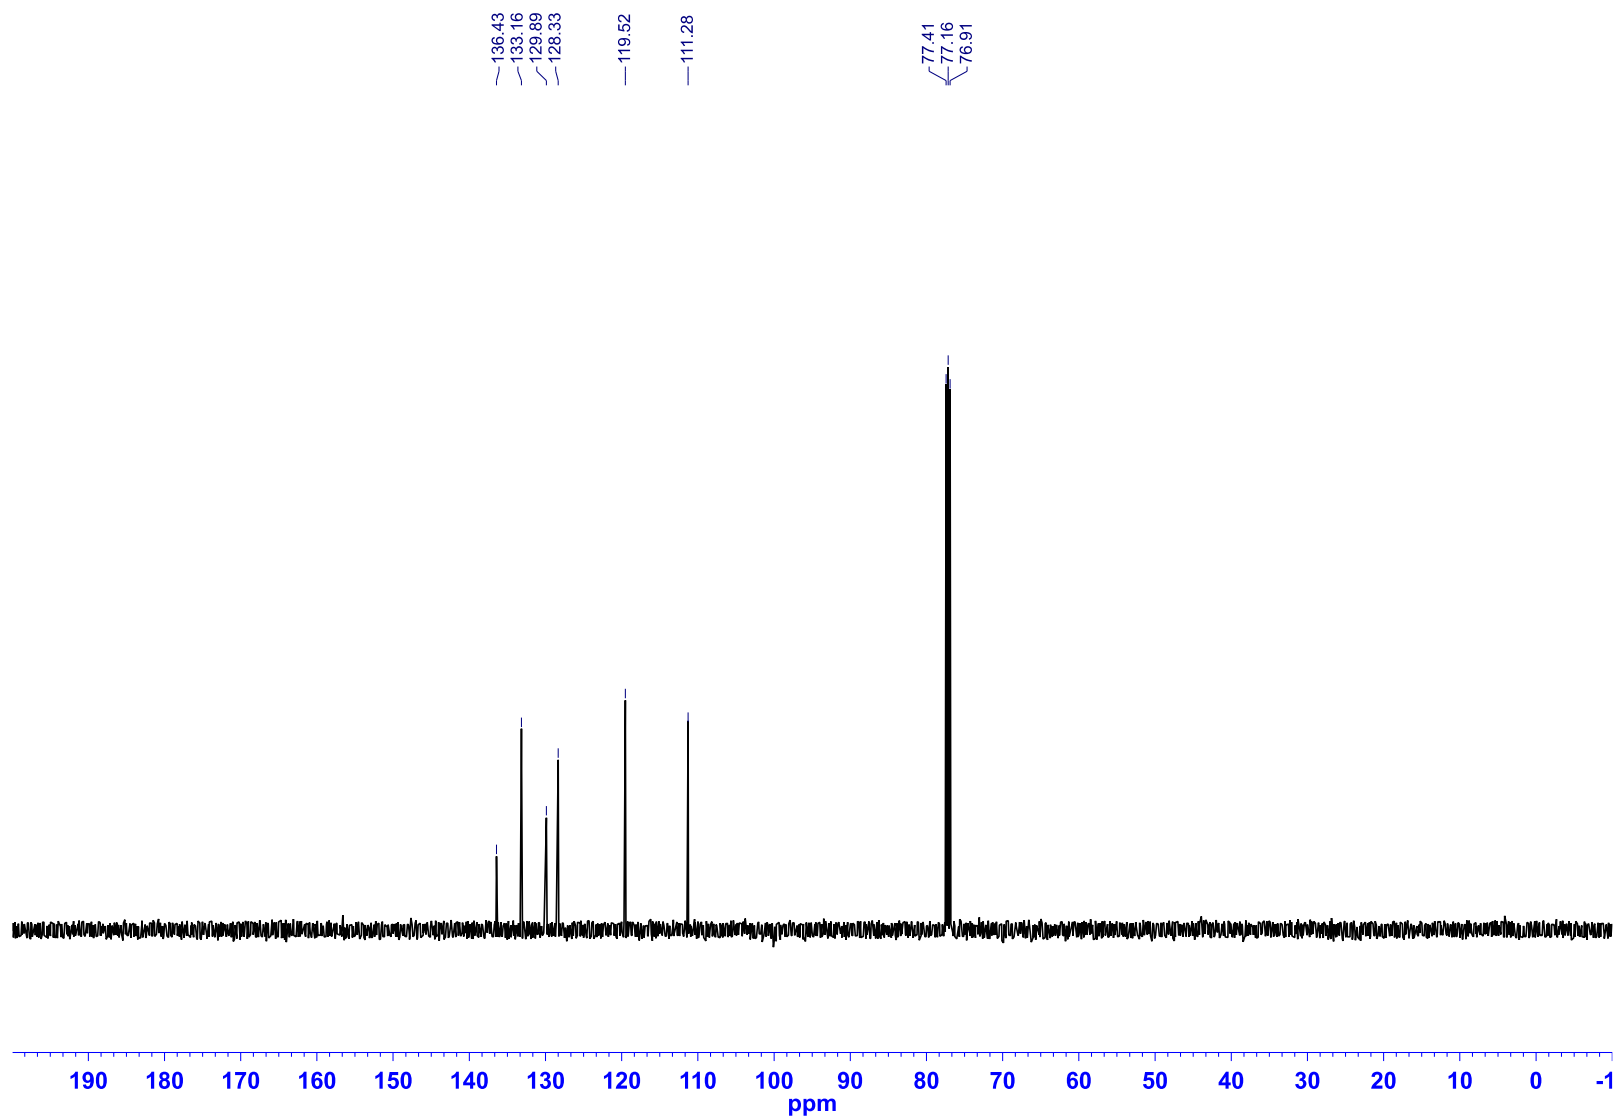

$^{11}\text{B}$  NMR (128.4 MHz, MeCN) of 2-Phenyl-2,3-dihydro-1*H*-1,3,2-benzodiazaborole (**5a**)

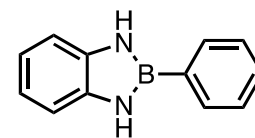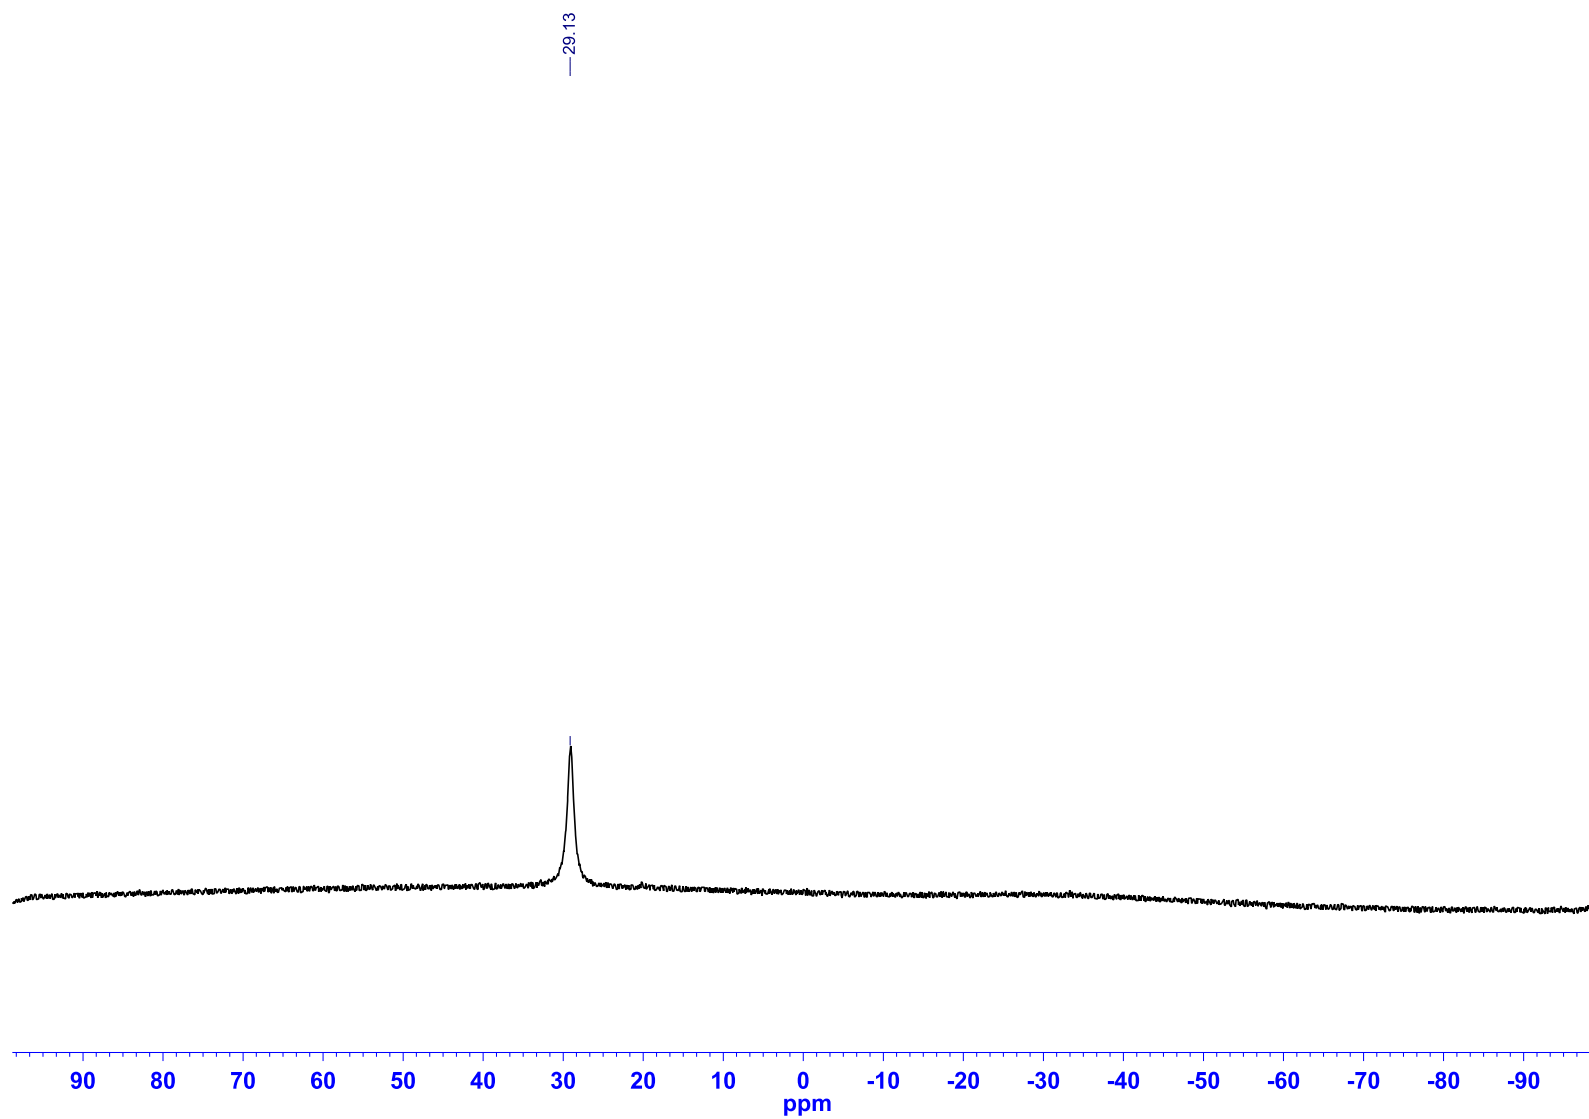

$^1\text{H}$  NMR (500.4 MHz,  $\text{CDCl}_3$ ) of 2-(*o*-tolyl)-2,3-dihydro-1*H*-1,3,2-benzodiazaborole (**5b**)

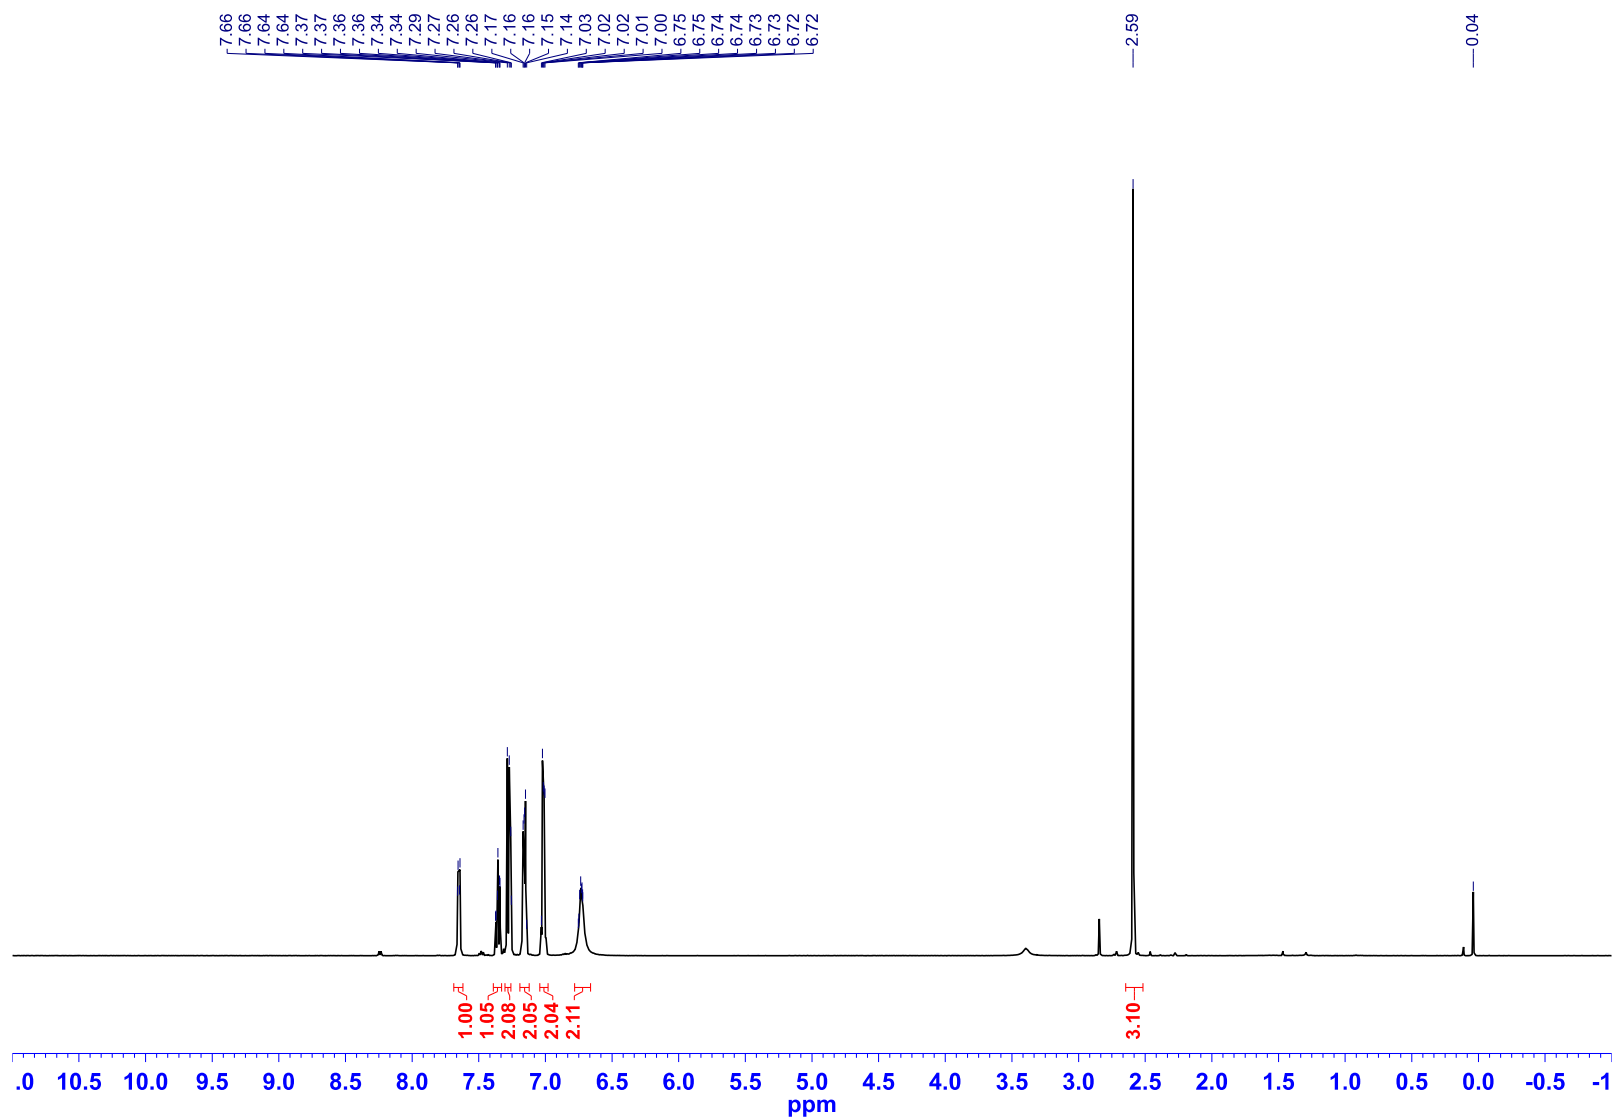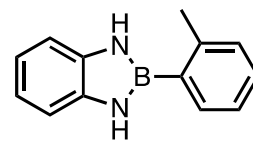

$^{13}\text{C}$  NMR (125.8 MHz,  $\text{CDCl}_3$ ) of 2-(*o*-tolyl)-2,3-dihydro-1*H*-1,3,2-benzodiazaborole (**5b**)

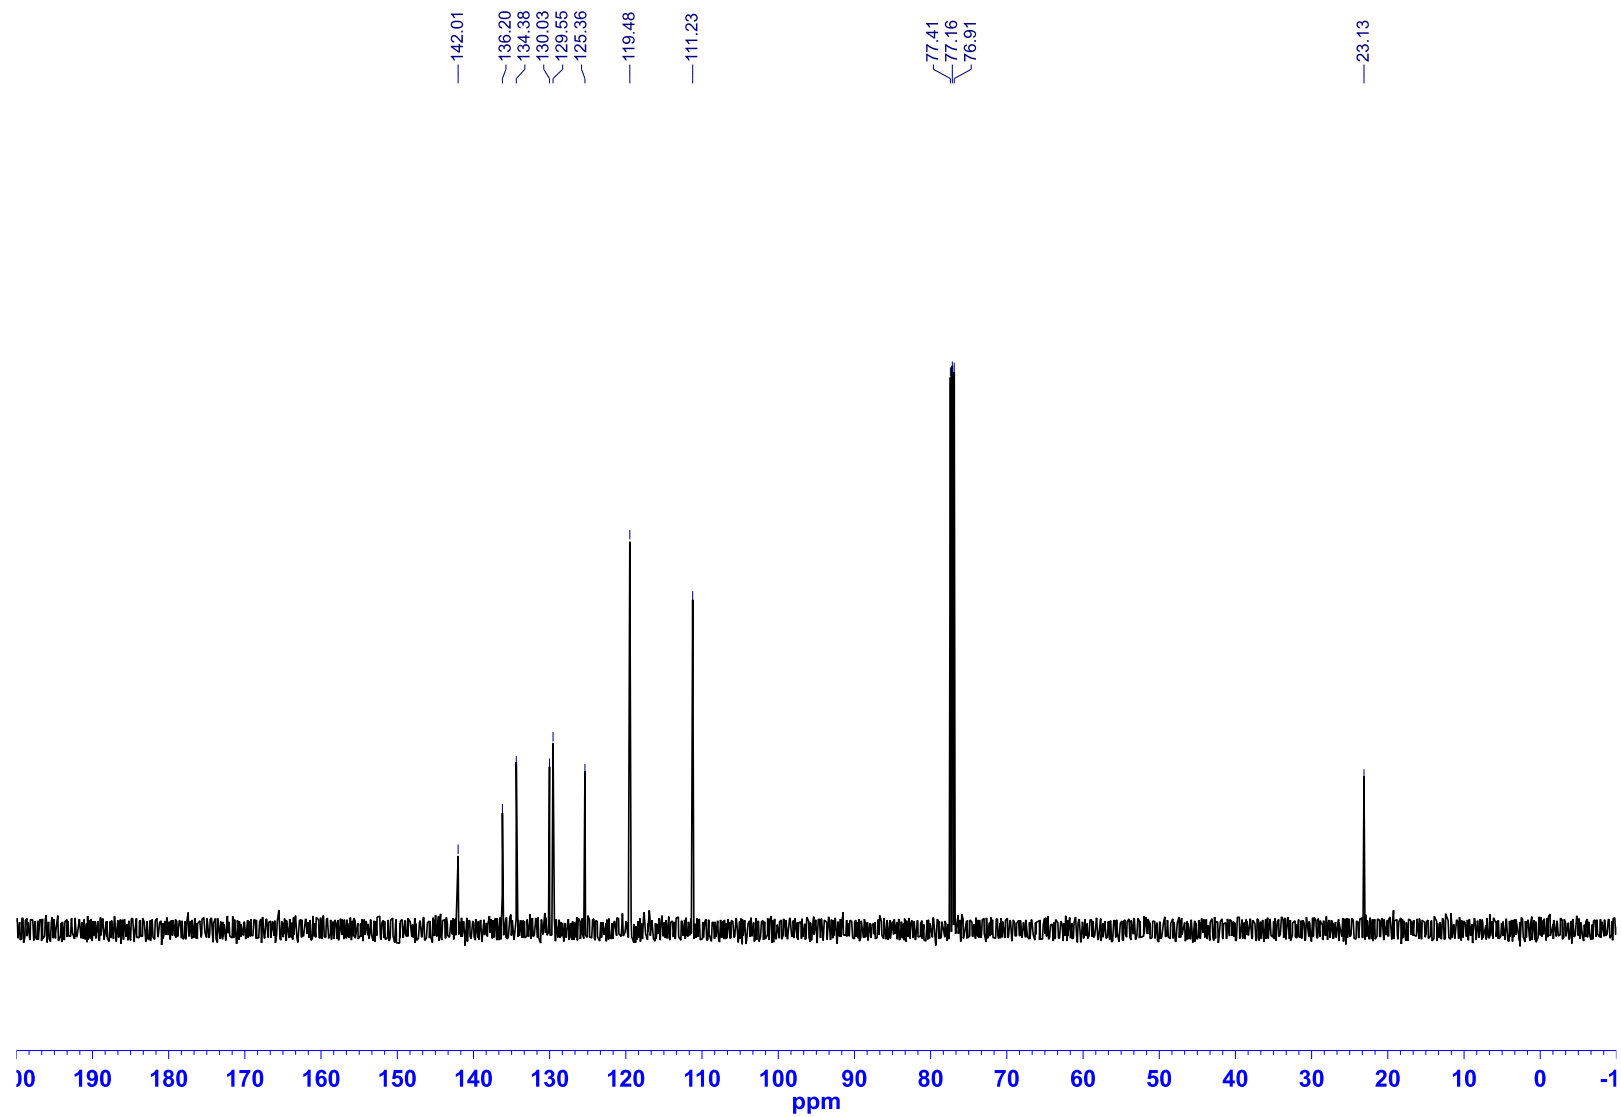

$^{11}\text{B}$  NMR (128.4 MHz, MeCN) of 2-(*o*-tolyl)-2,3-dihydro-1*H*-1,3,2-benzodiazaborole (**5b**)

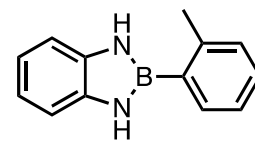

—28.97

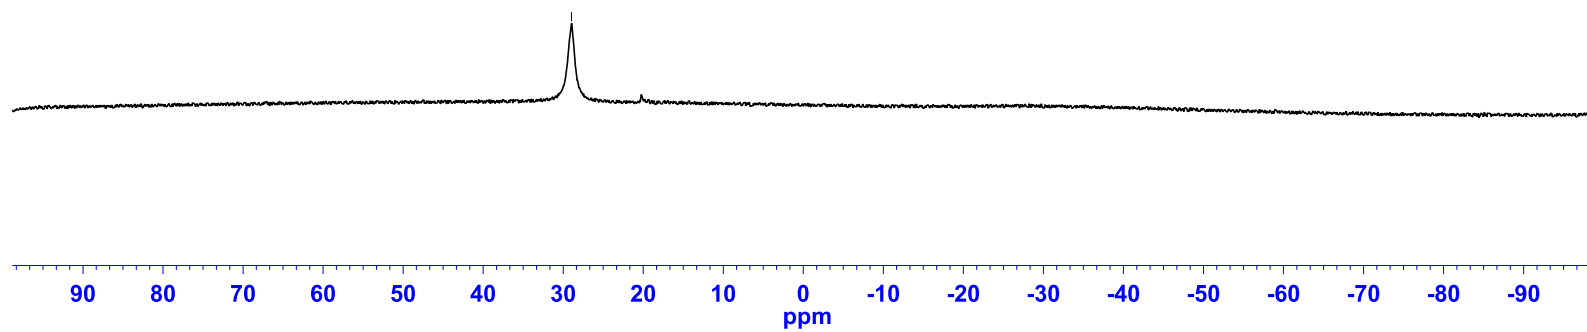



$^1\text{H}$  NMR (500.4 MHz,  $\text{CDCl}_3$ ) of 2-(2,6-dimethylphenyl)-2,3-dihydro-1*H*-1,3,2-benzodiazaborole (**5c**)

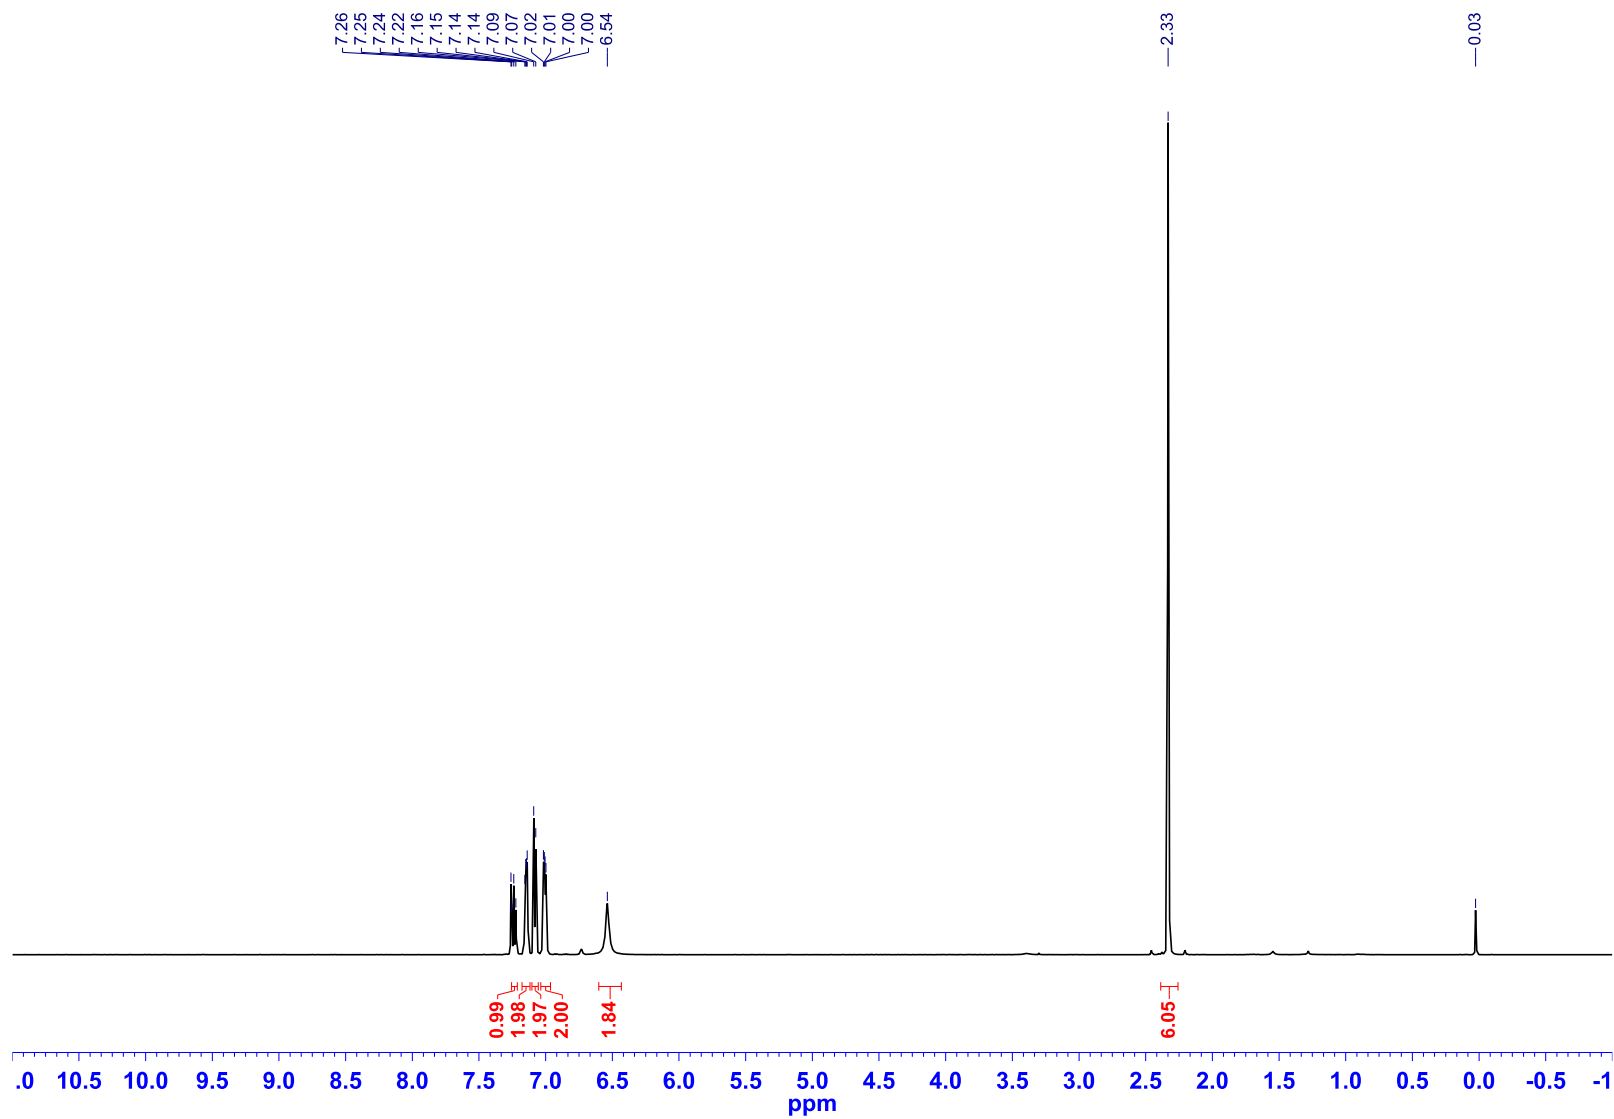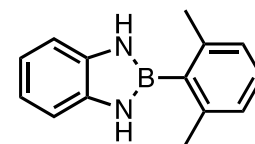

$^{13}\text{C}$  NMR (125.8 MHz,  $\text{CDCl}_3$ ) of 2-(2,6-dimethylphenyl)-2,3-dihydro-1*H*-1,3,2-benzodiazaborole (**5c**)

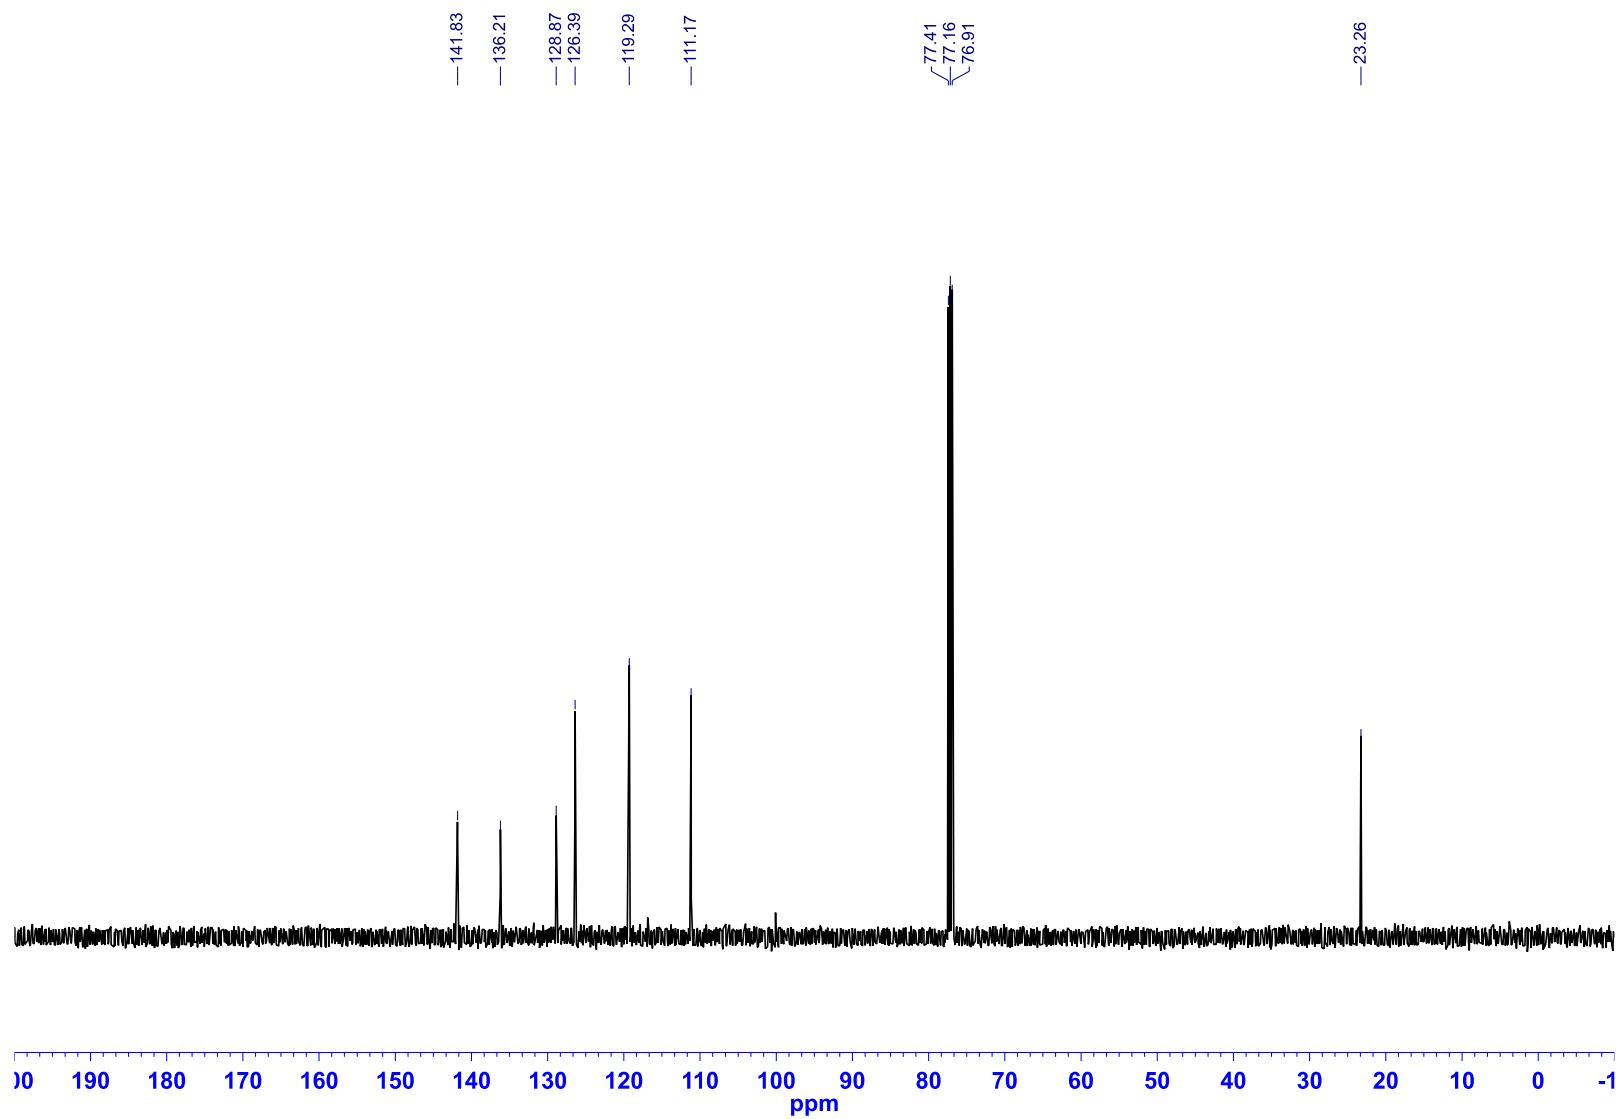

$^{11}\text{B}$  NMR (128.4 MHz, MeCN) of 2-(2,6-dimethylphenyl)-2,3-dihydro-1*H*-1,3,2-benzodiazaborole (**5c**)

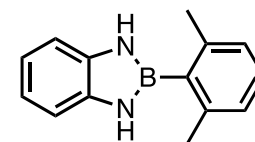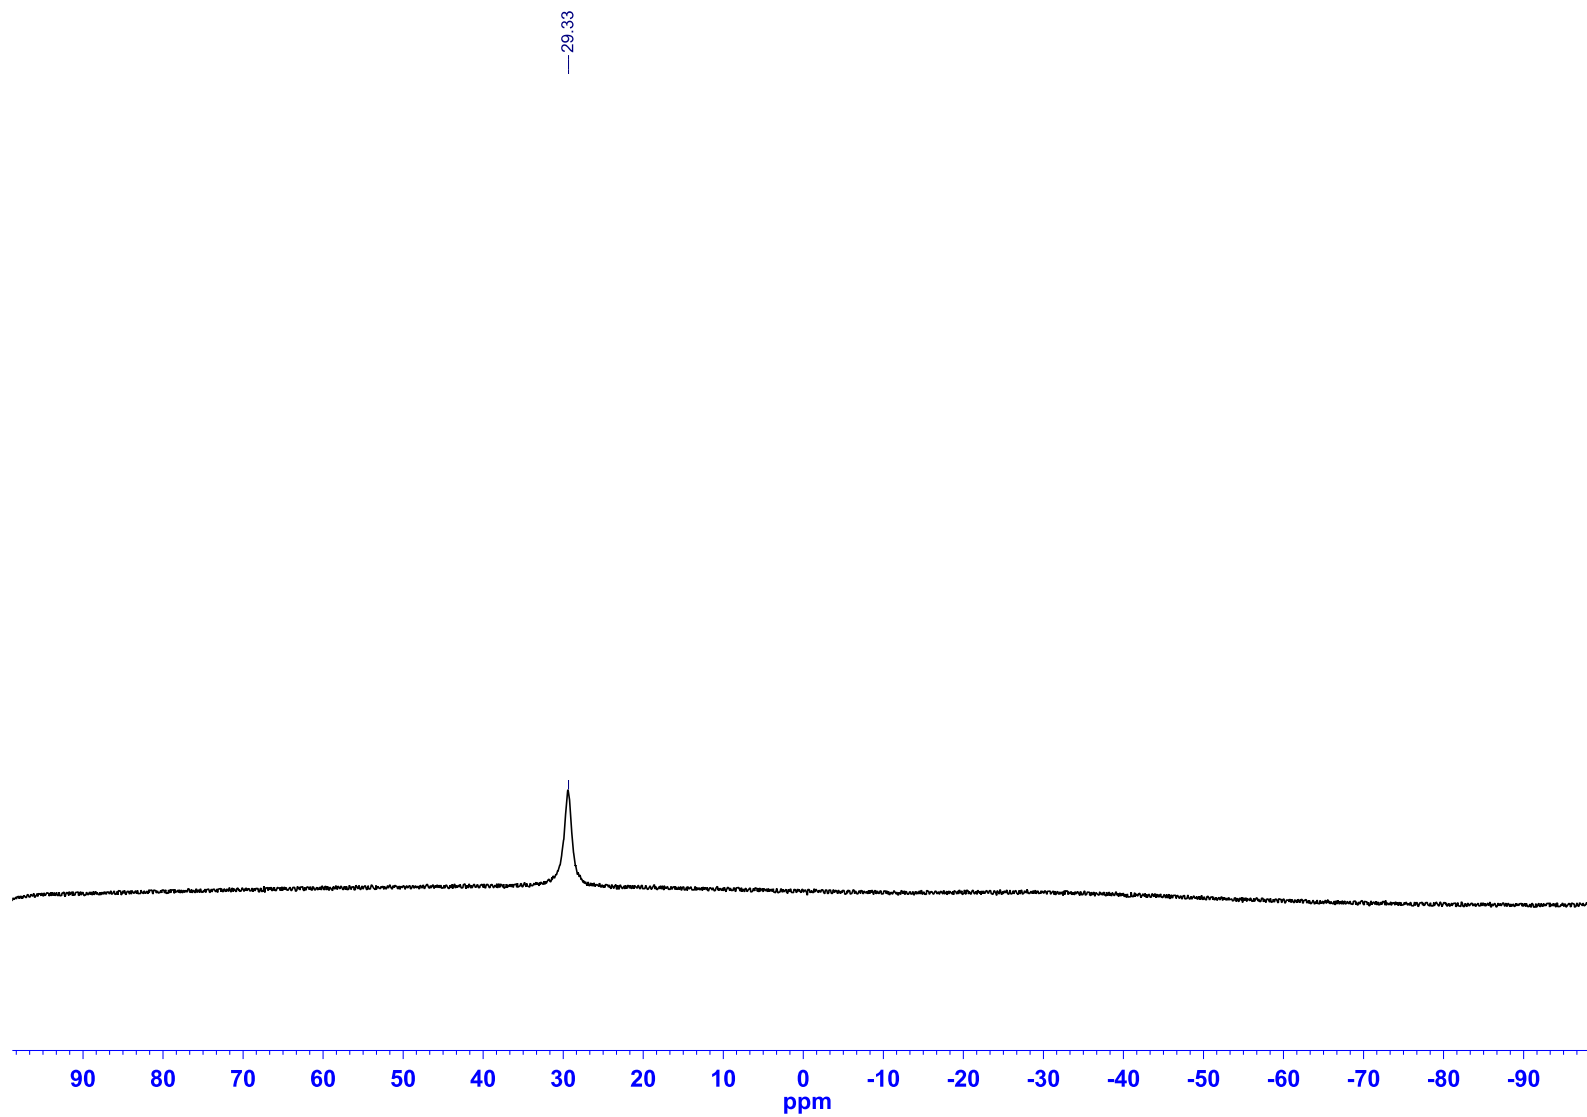

$^1\text{H}$  NMR (500.4 MHz,  $\text{CDCl}_3$ ) of 1-methyl-2-phenyl-2,3-dihydro-1*H*-1,3,2-benzodiazaborole (**5d**)

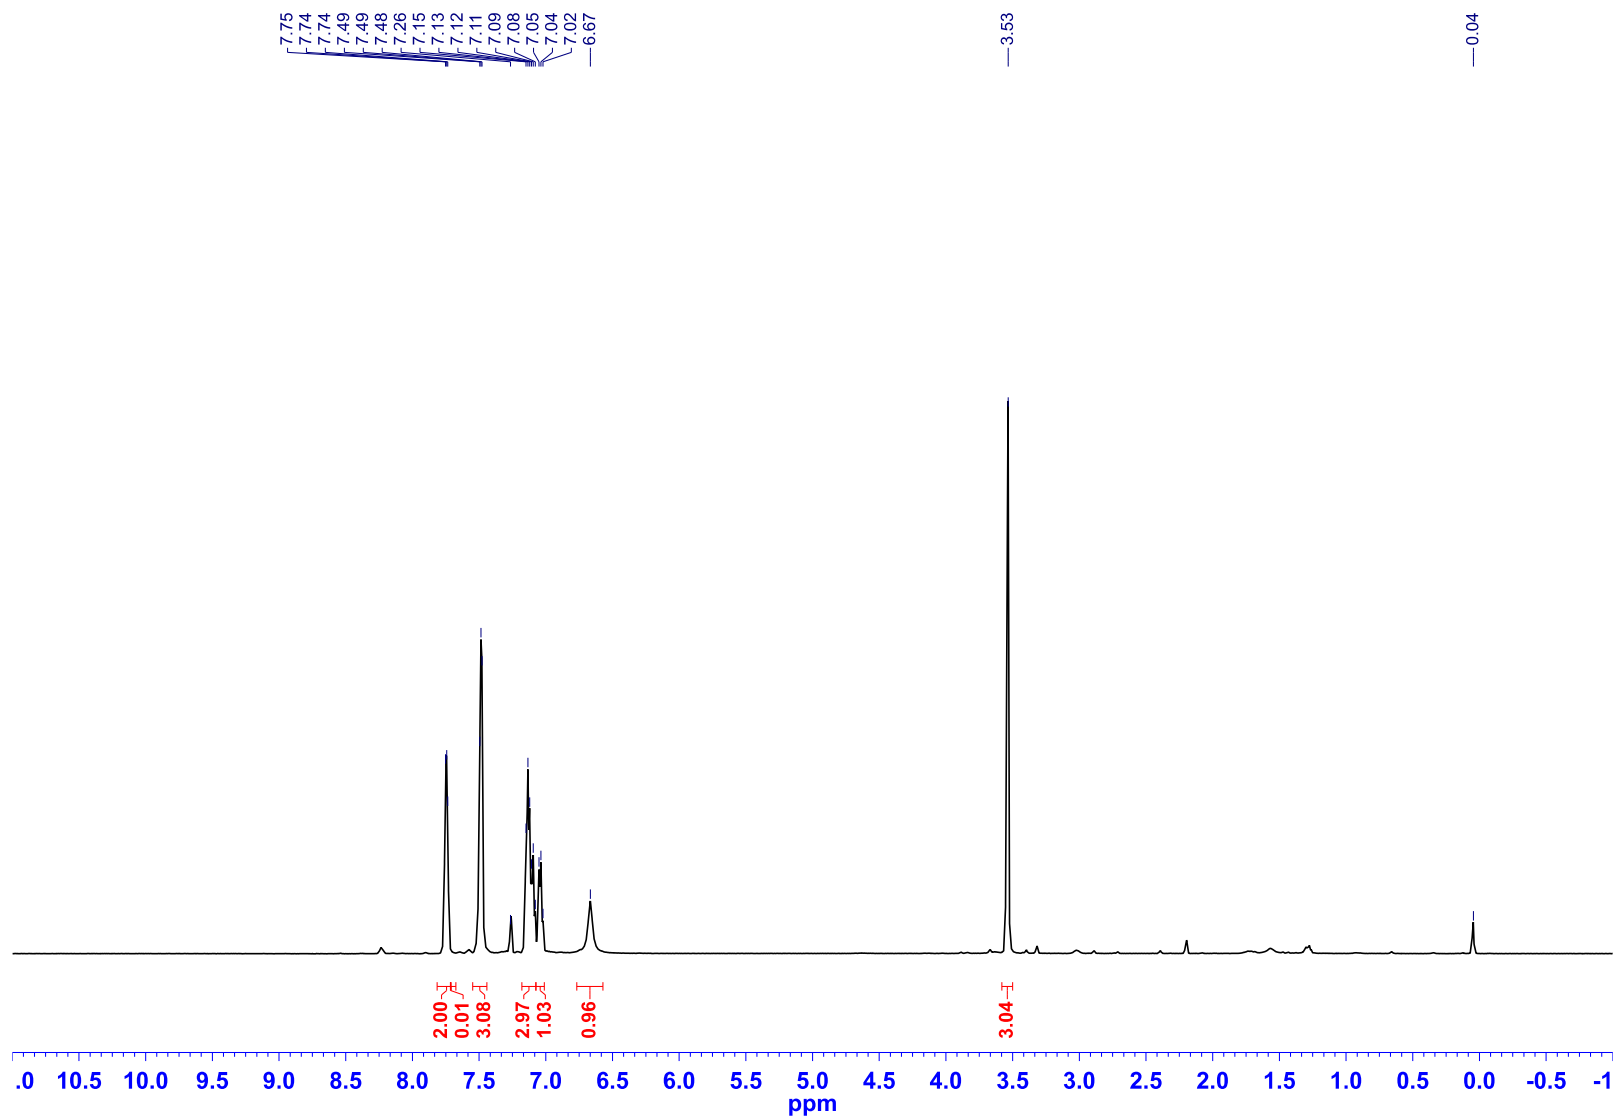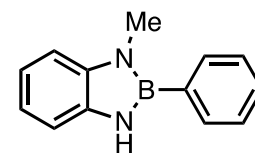

$^{13}\text{C}$  NMR (125.8 MHz,  $\text{CDCl}_3$ ) of 1-methyl-2-phenyl-2,3-dihydro-1*H*-1,3,2-benzodiazaborole (**5d**)

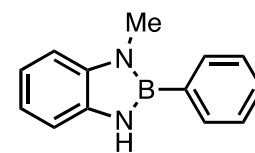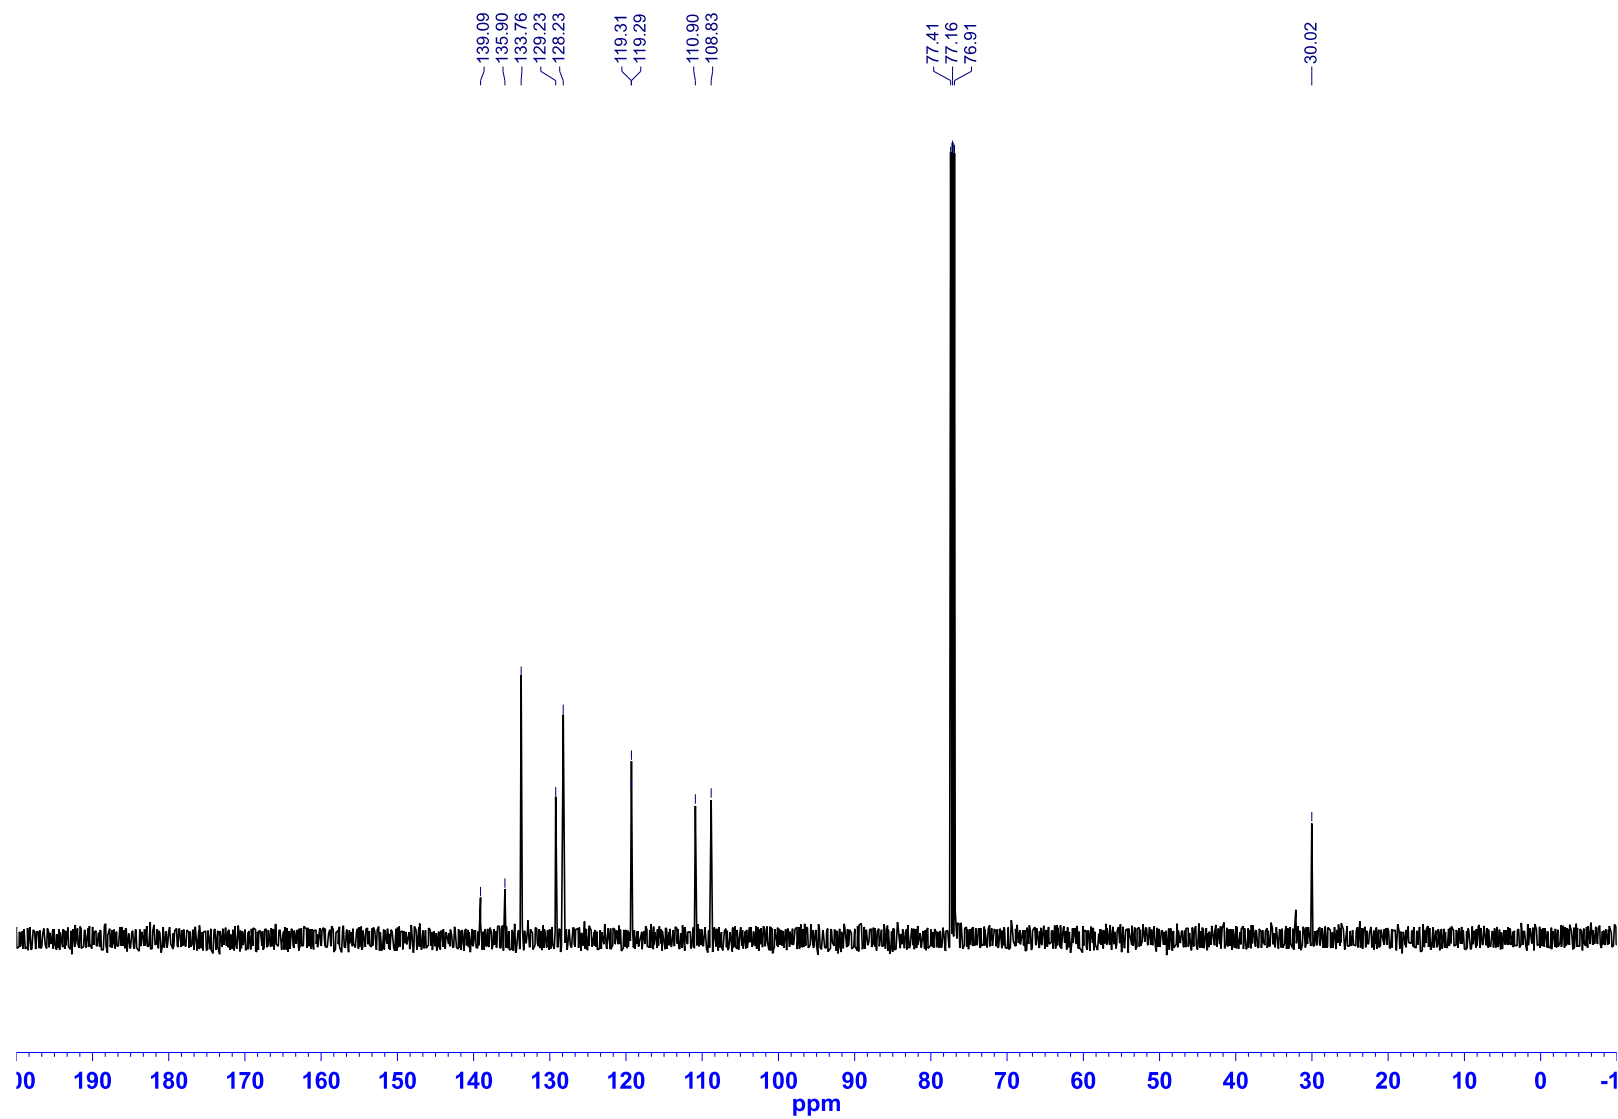

$^{11}\text{B}$  NMR (128.4 MHz, MeCN) of 1-methyl-2-phenyl-2,3-dihydro-1*H*-1,3,2-benzodiazaborole (**5d**)

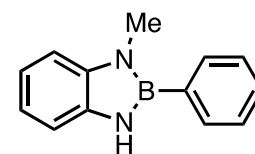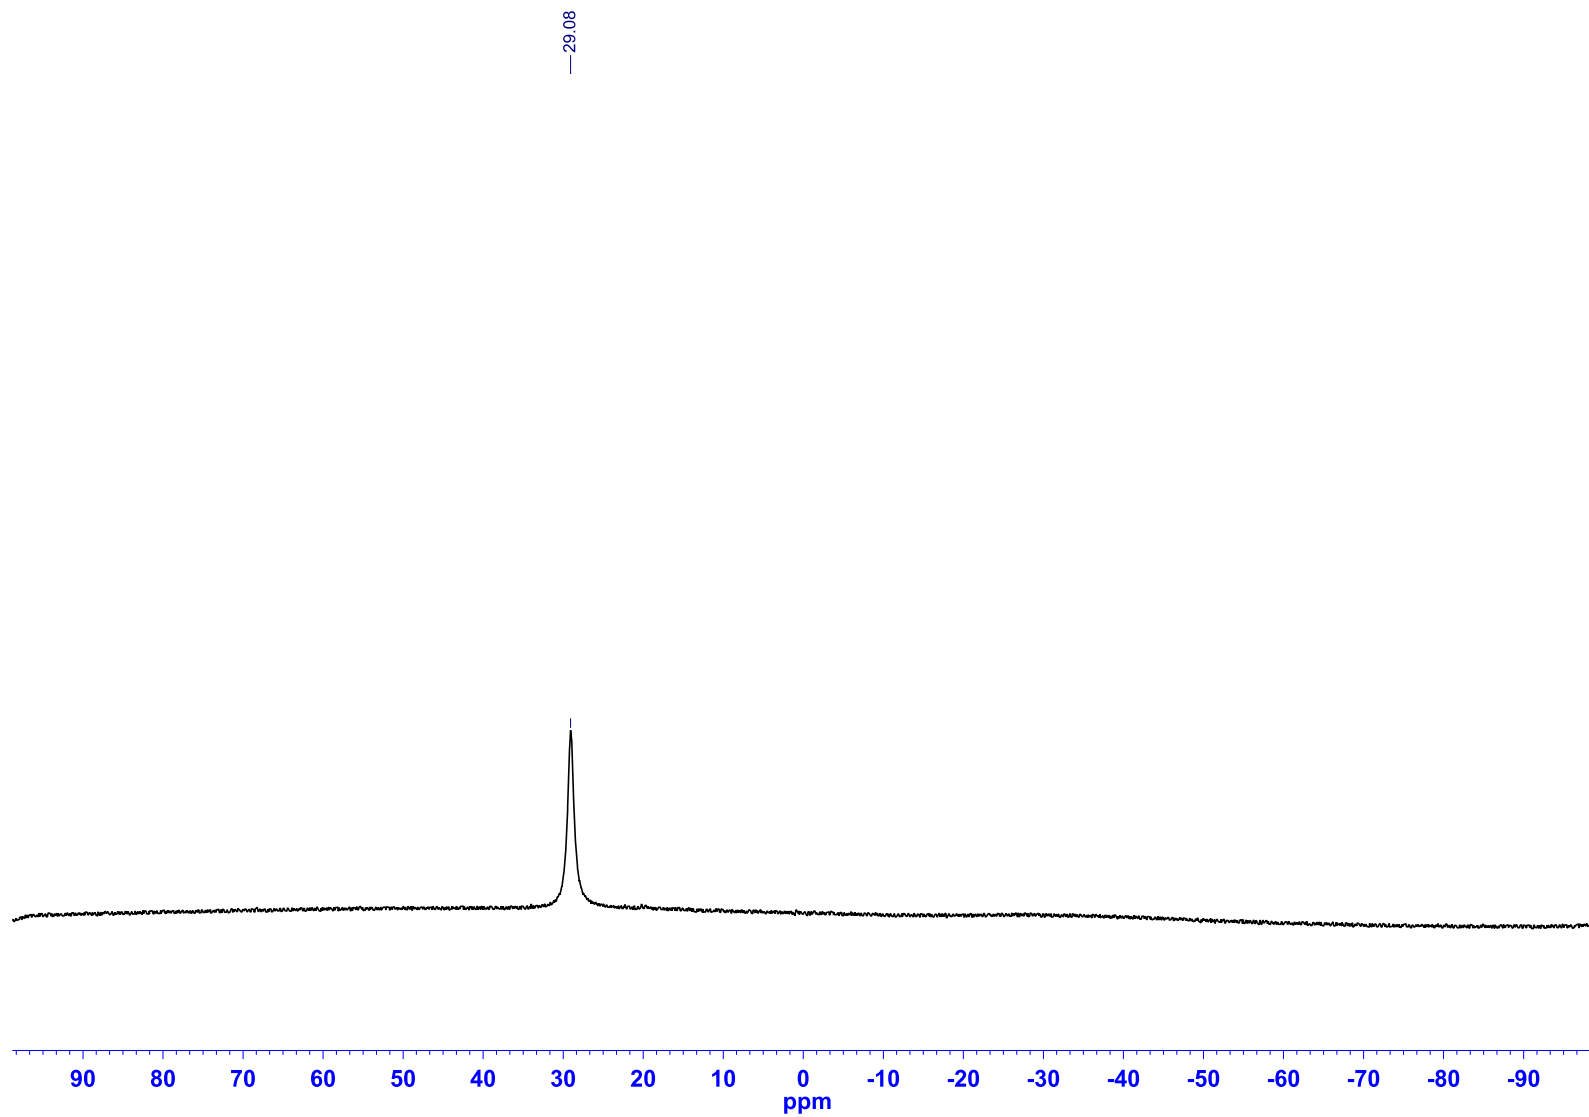

$^1\text{H}$  NMR (500.4 MHz,  $\text{DMSO-}d_6$ ) of 2-(2,6-difluorophenyl)-2,3-dihydro-1*H*-1,3,2-benzodiazaborole (**5e**)

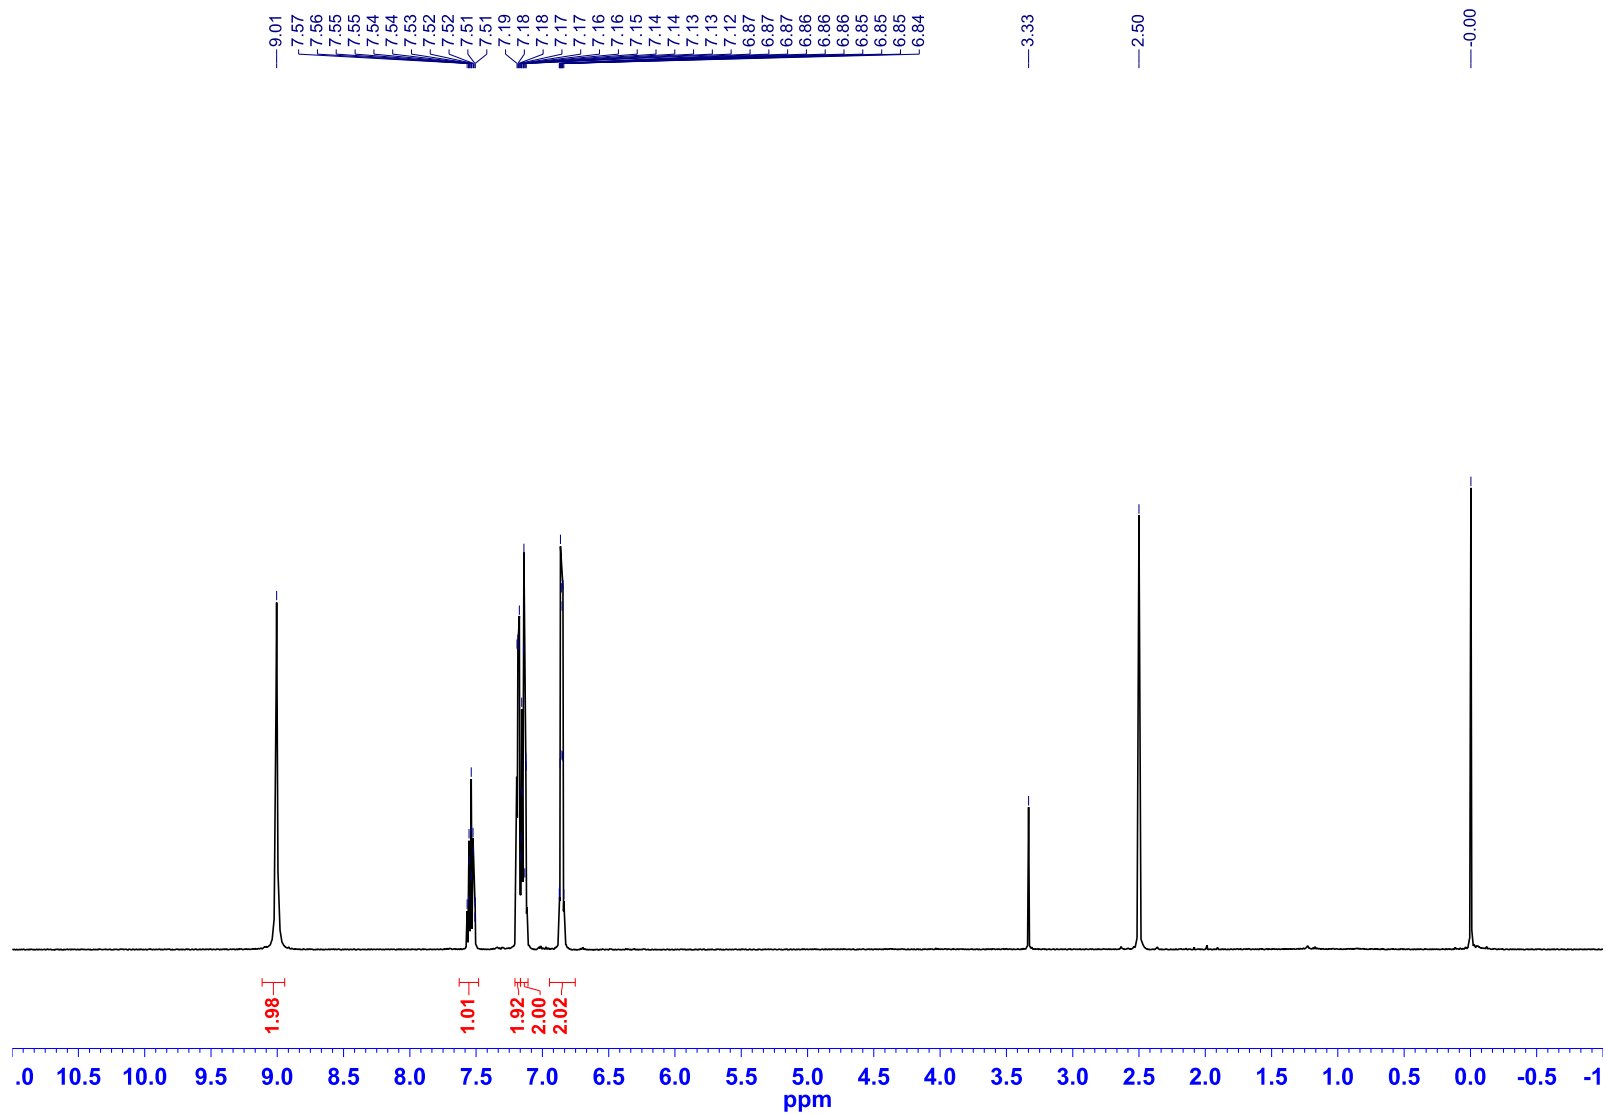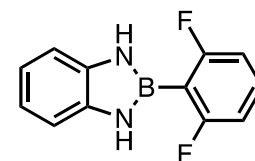

$^{13}\text{C}$  NMR (125.8 MHz,  $\text{CDCl}_3$ ) of 2-(2,6-difluorophenyl)-2,3-dihydro-1*H*-1,3,2-benzodiazaborole (**5e**)

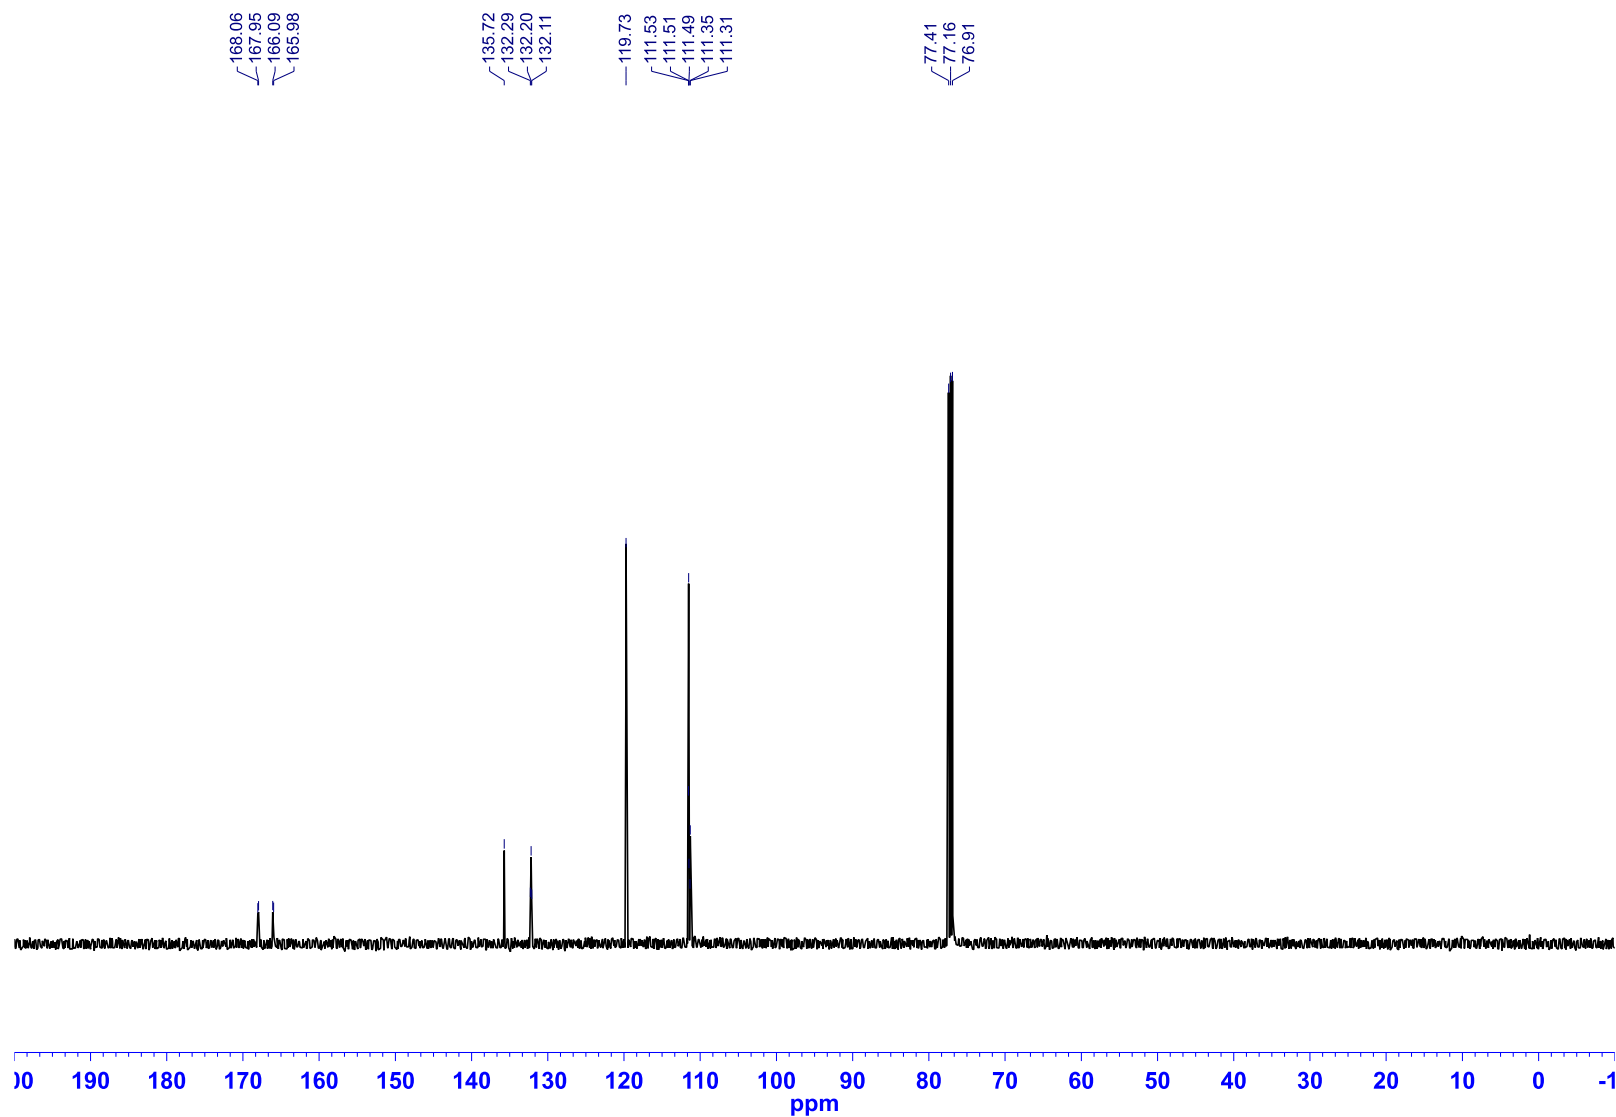



$^{11}\text{B}$  NMR (128.4 MHz, MeCN) of 2-(2,6-difluorophenyl)-2,3-dihydro-1*H*-1,3,2-benzodiazaborole (**5e**)



— 25.06

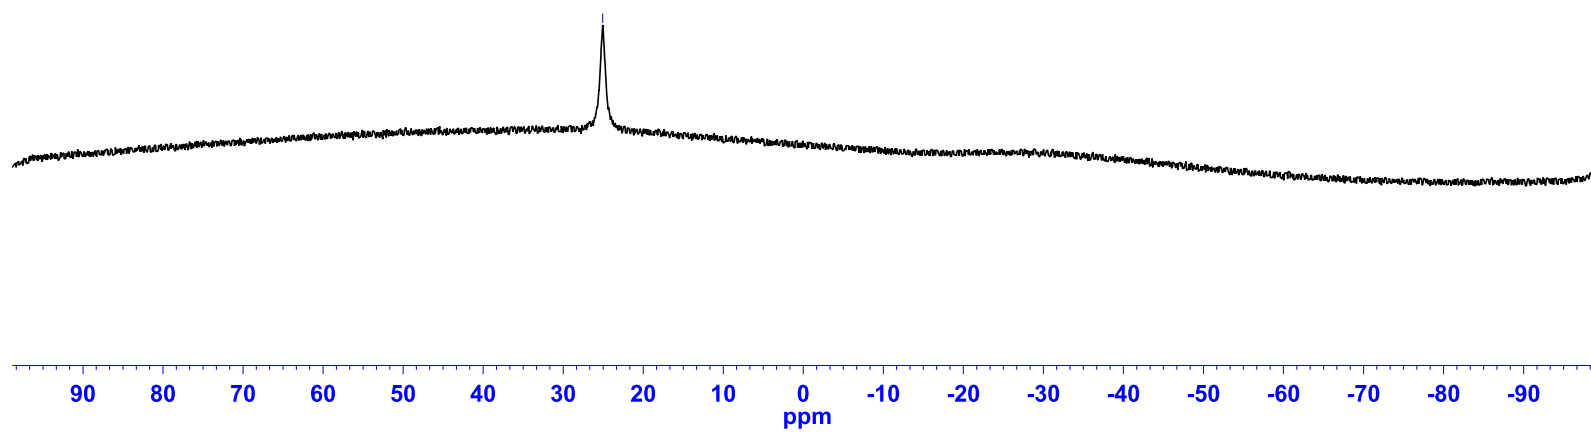

$^{19}\text{F}$  NMR (282.4 MHz,  $\text{CDCl}_3$ ) of 2-(2,6-difluorophenyl)-2,3-dihydro-1*H*-1,3,2-benzodiazaborole (**5e**)

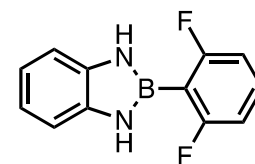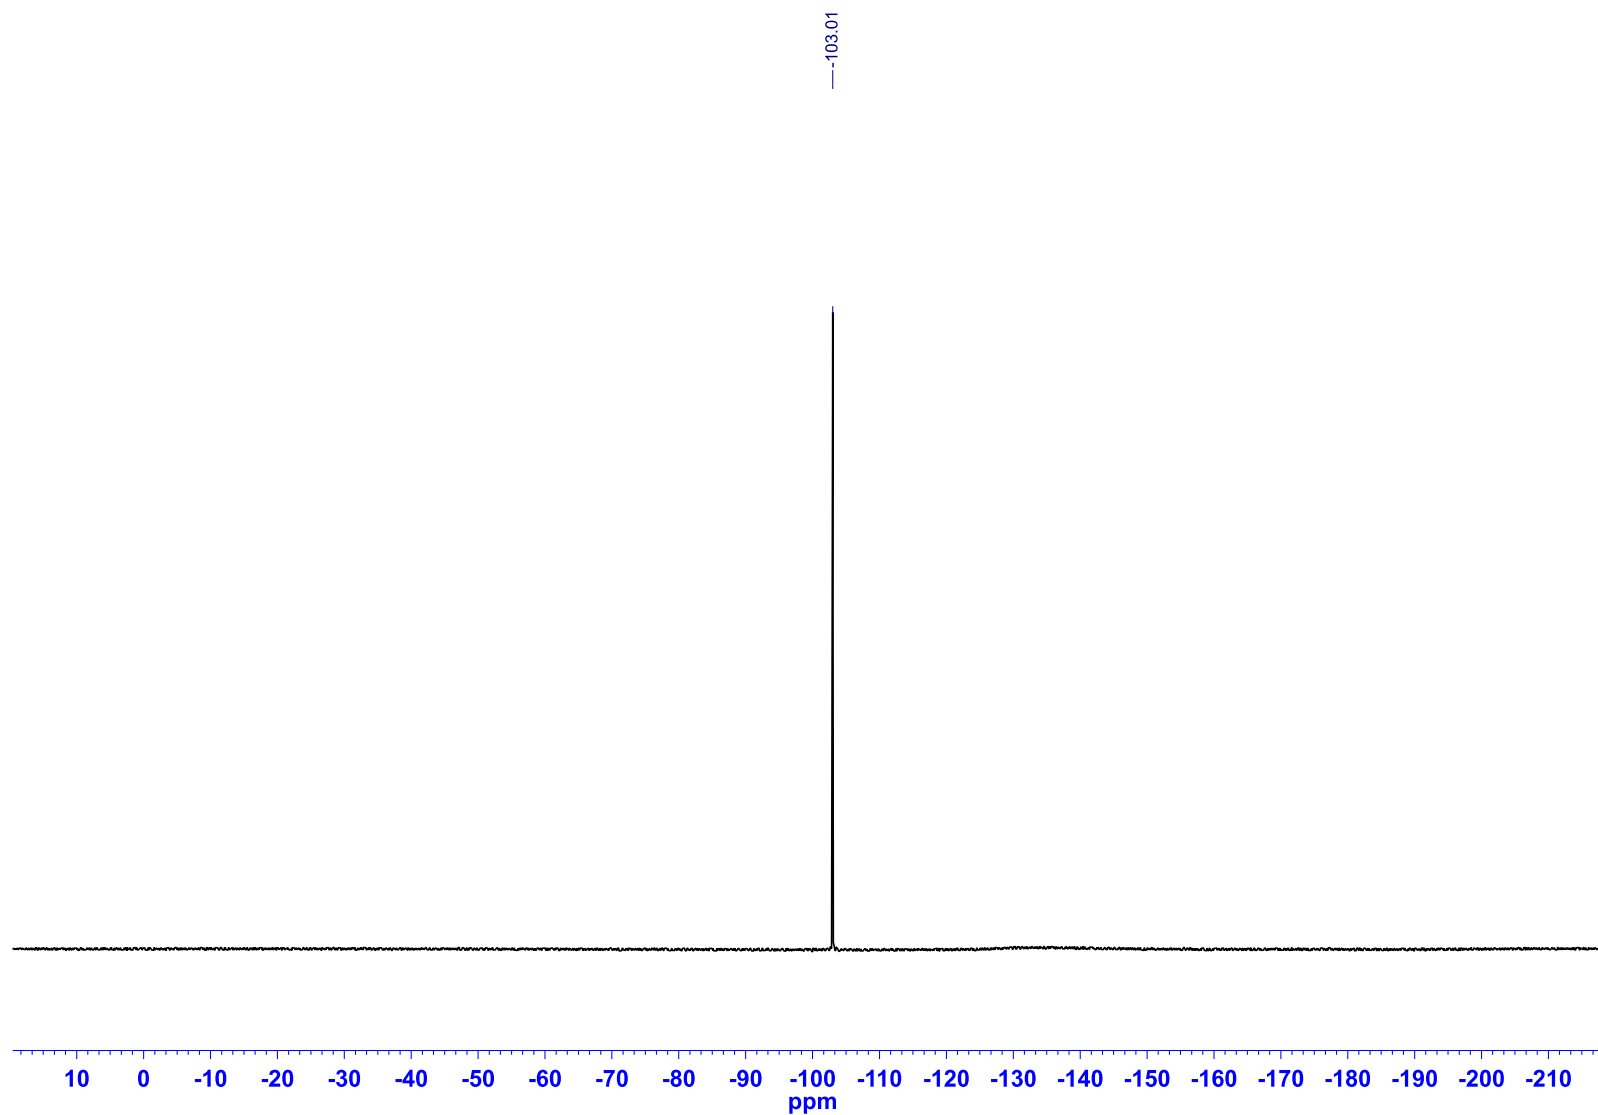

$^1\text{H}$  NMR (500.4 MHz,  $\text{CDCl}_3$ ) of 2-(4-bromophenyl)-2,3-dihydro-1H-1,3,2-benzodiazaborole (**5f**)

7.60  
7.58  
7.56  
7.26  
7.14  
7.13  
7.13  
7.12  
6.99  
6.98  
6.77

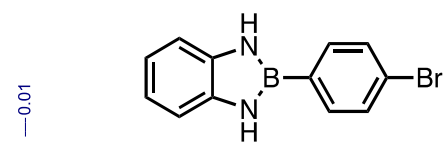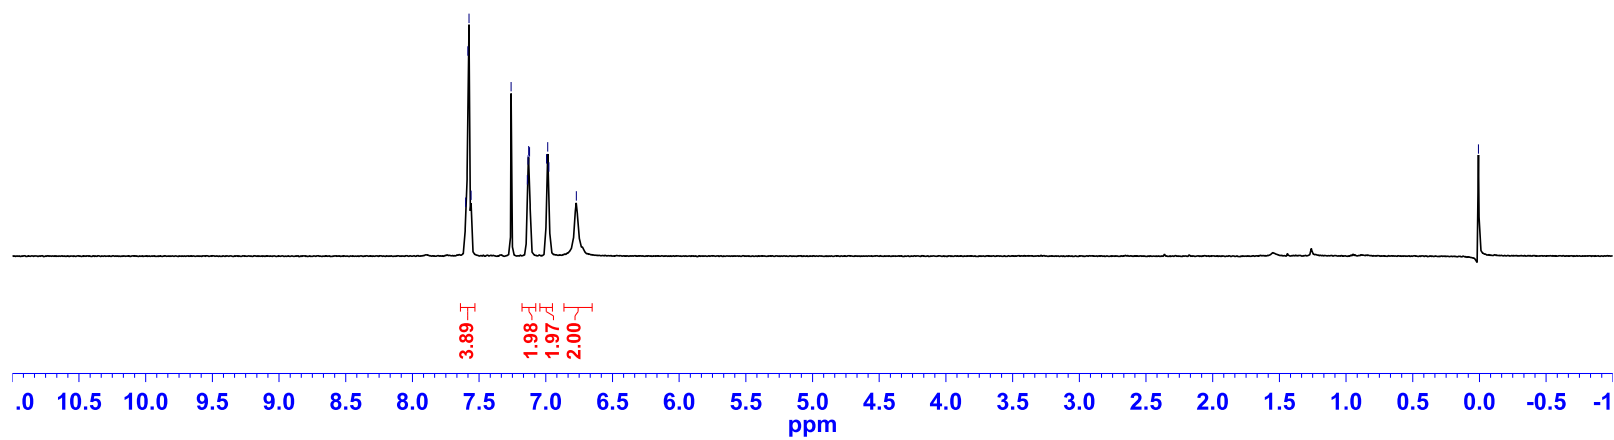

$^{13}\text{C}$  NMR (125.8 MHz,  $\text{CDCl}_3$ ) of 2-(4-bromophenyl)-2,3-dihydro-1H-1,3,2-benzodiazaborole (**5f**)

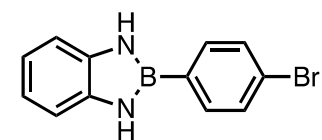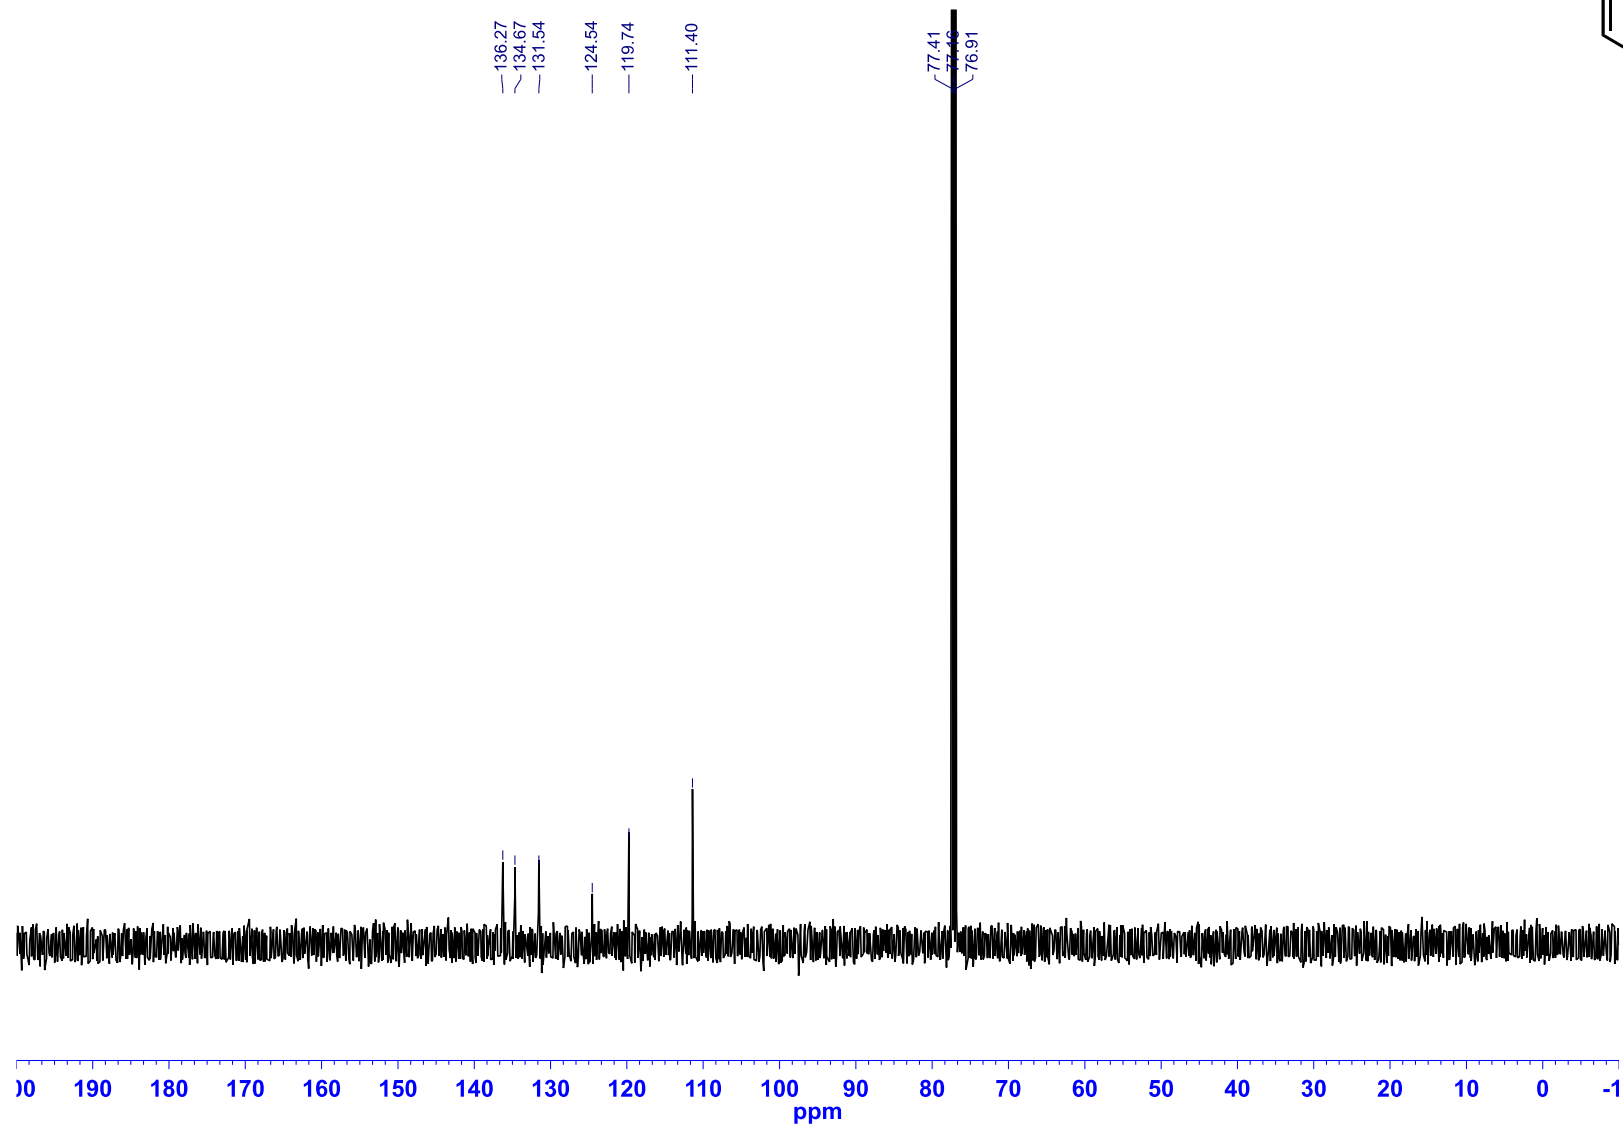

$^{11}\text{B}$  NMR (128.4 MHz, MeCN) of 2-(4-bromophenyl)-2,3-dihydro-1*H*-1,3,2-benzodiazaborole (**5f**)

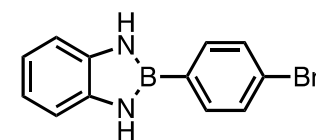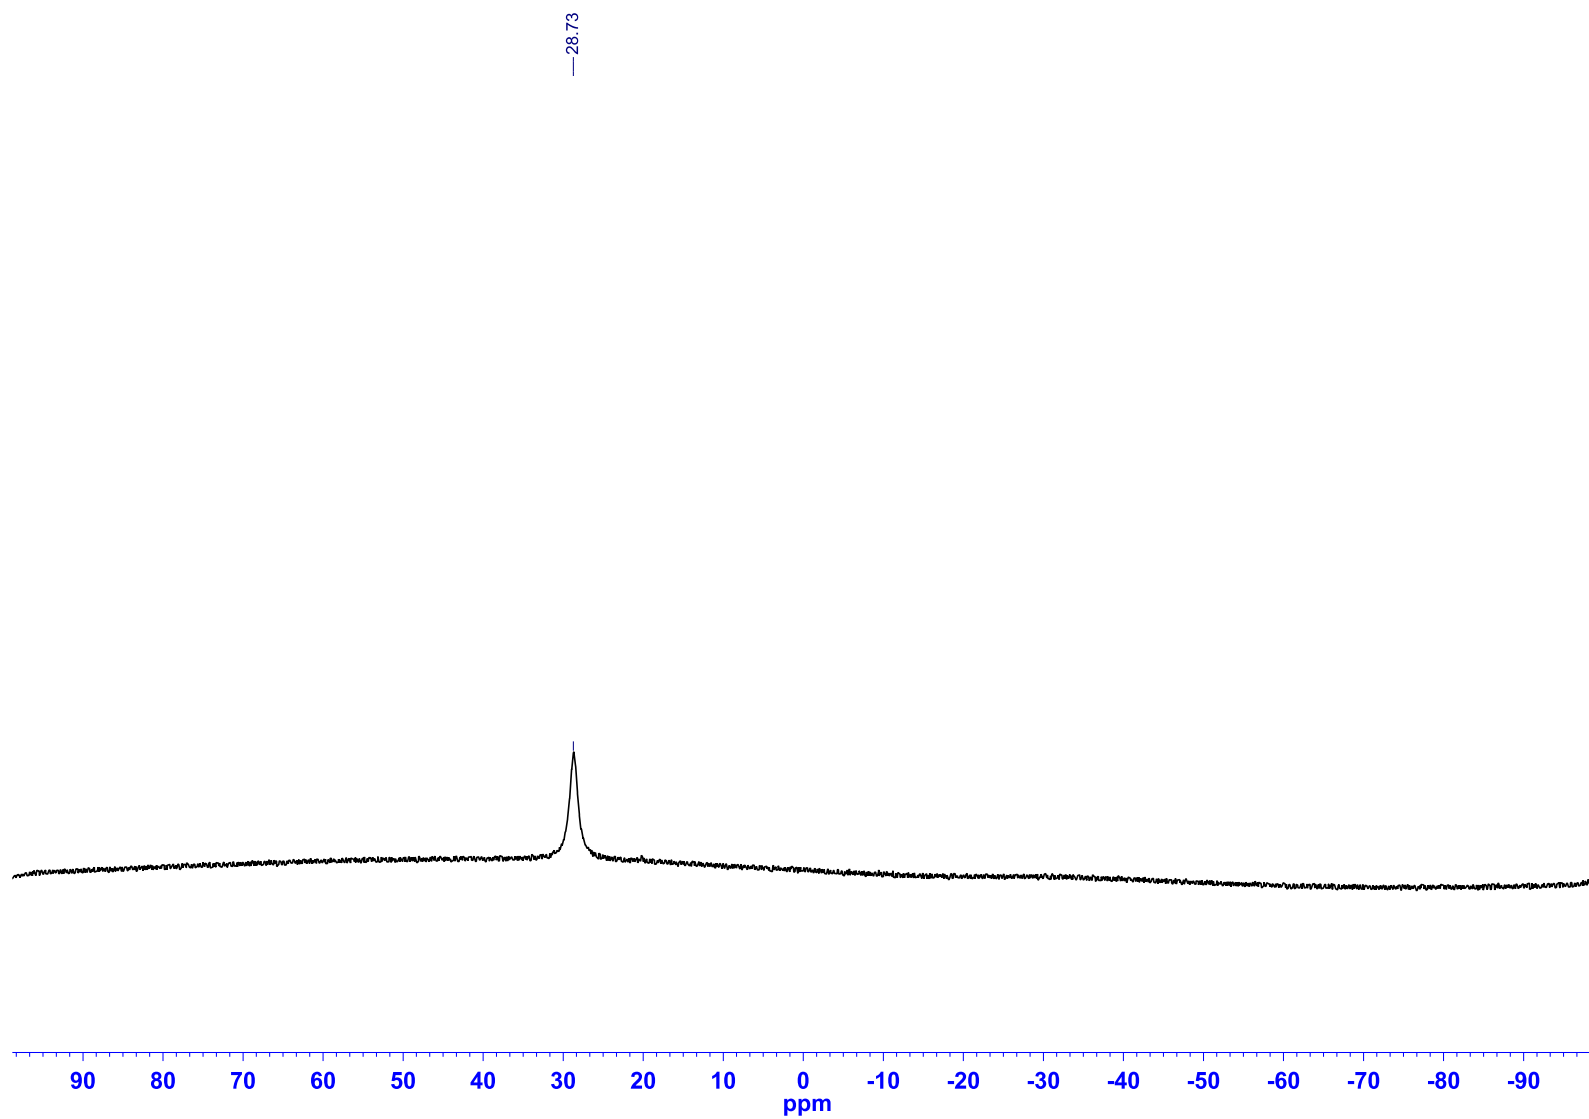

$^1\text{H}$  NMR (500.4 MHz,  $\text{CDCl}_3$ ) of 2-(4-fluorophenyl)-1-methyl-2,3-dihydro-1*H*-1,3,2-benzodiazaborole (**5g**)

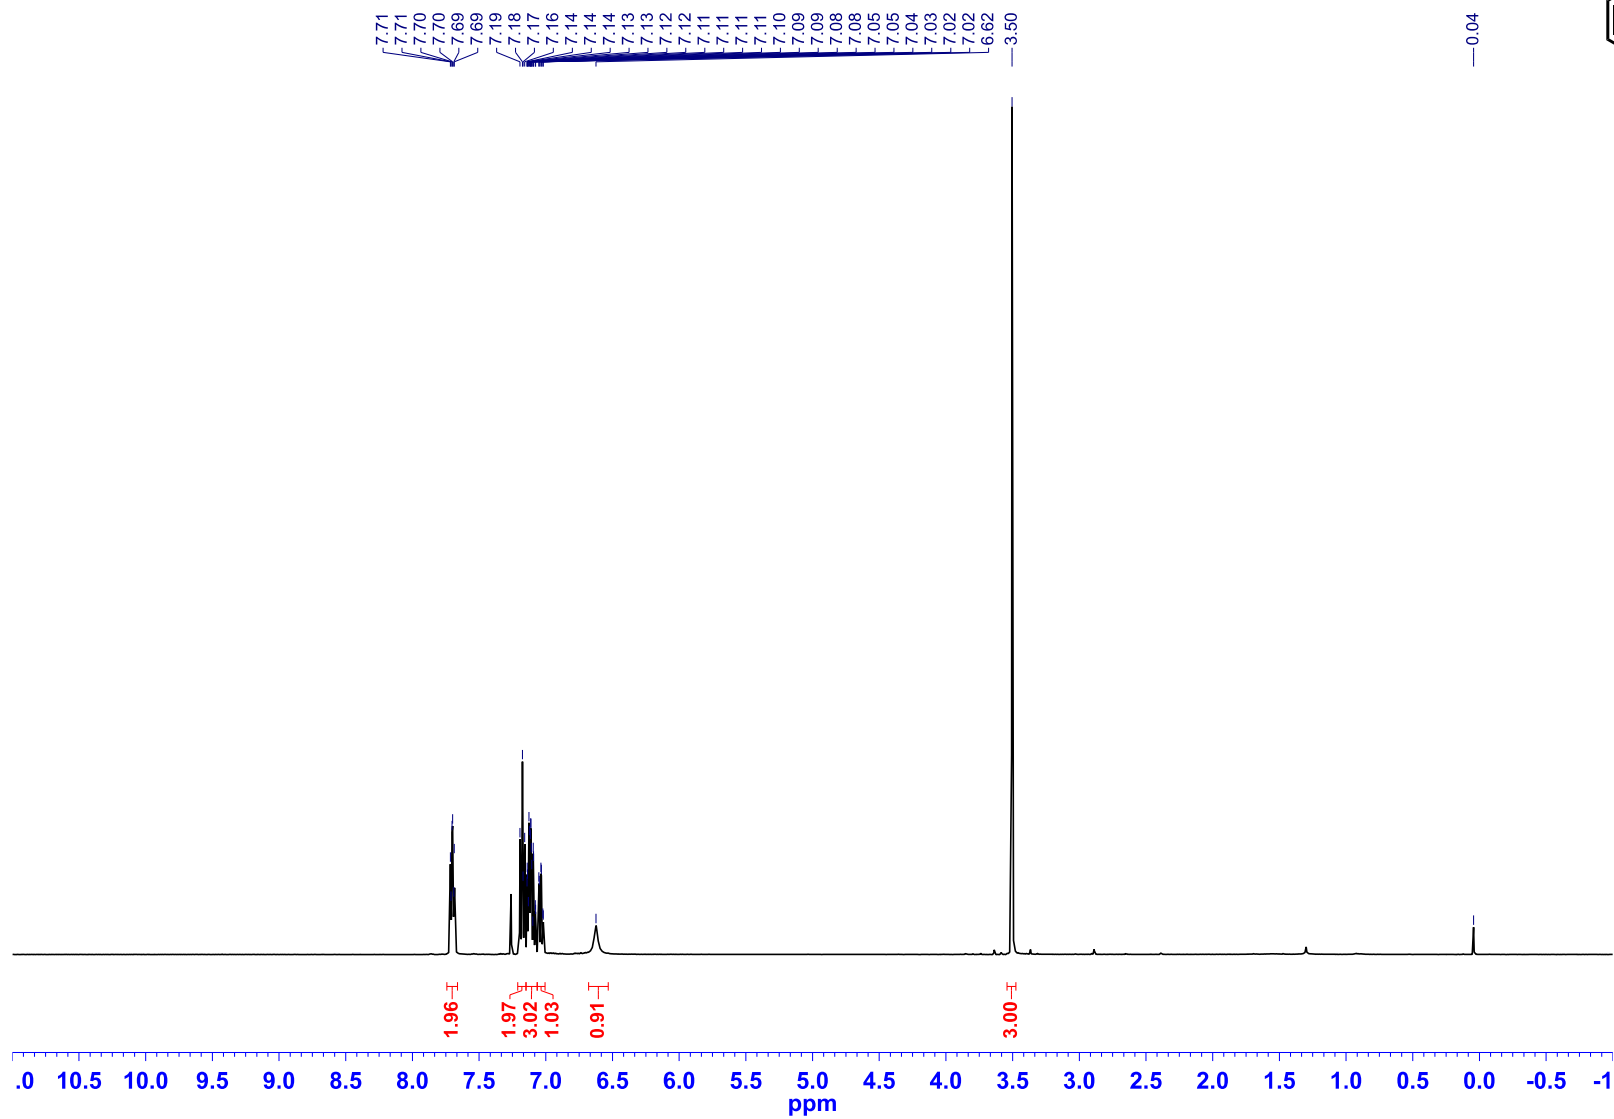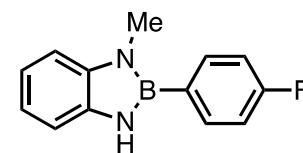

$^{13}\text{C}$  NMR (125.8 MHz,  $\text{CDCl}_3$ ) of 2-(4-fluorophenyl)-1-methyl-2,3-dihydro-1*H*-1,3,2-benzodiazaborole (**5g**)

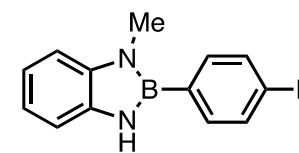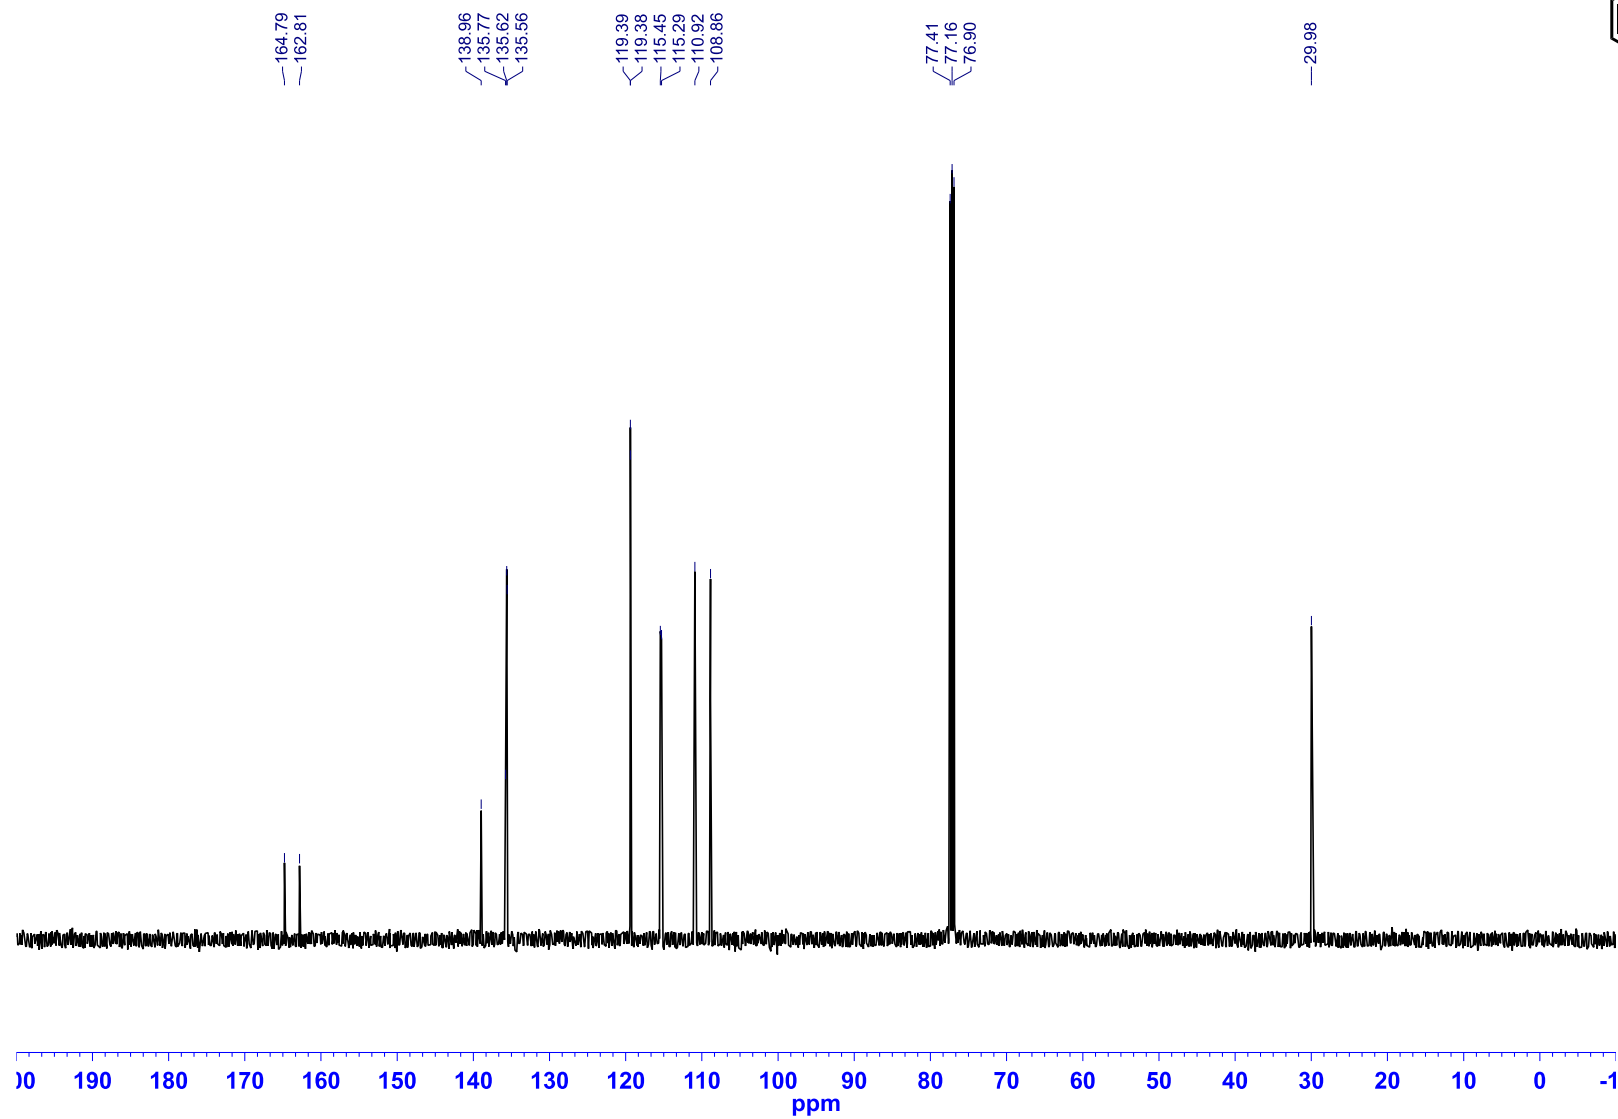

$^{11}\text{B}$  NMR (128.4 MHz, MeCN) of 2-(4-fluorophenyl)-1-methy-2,3-dihydro-1*H*-1,3,2-benzodiazaborole (**5g**)

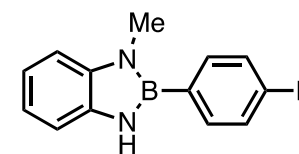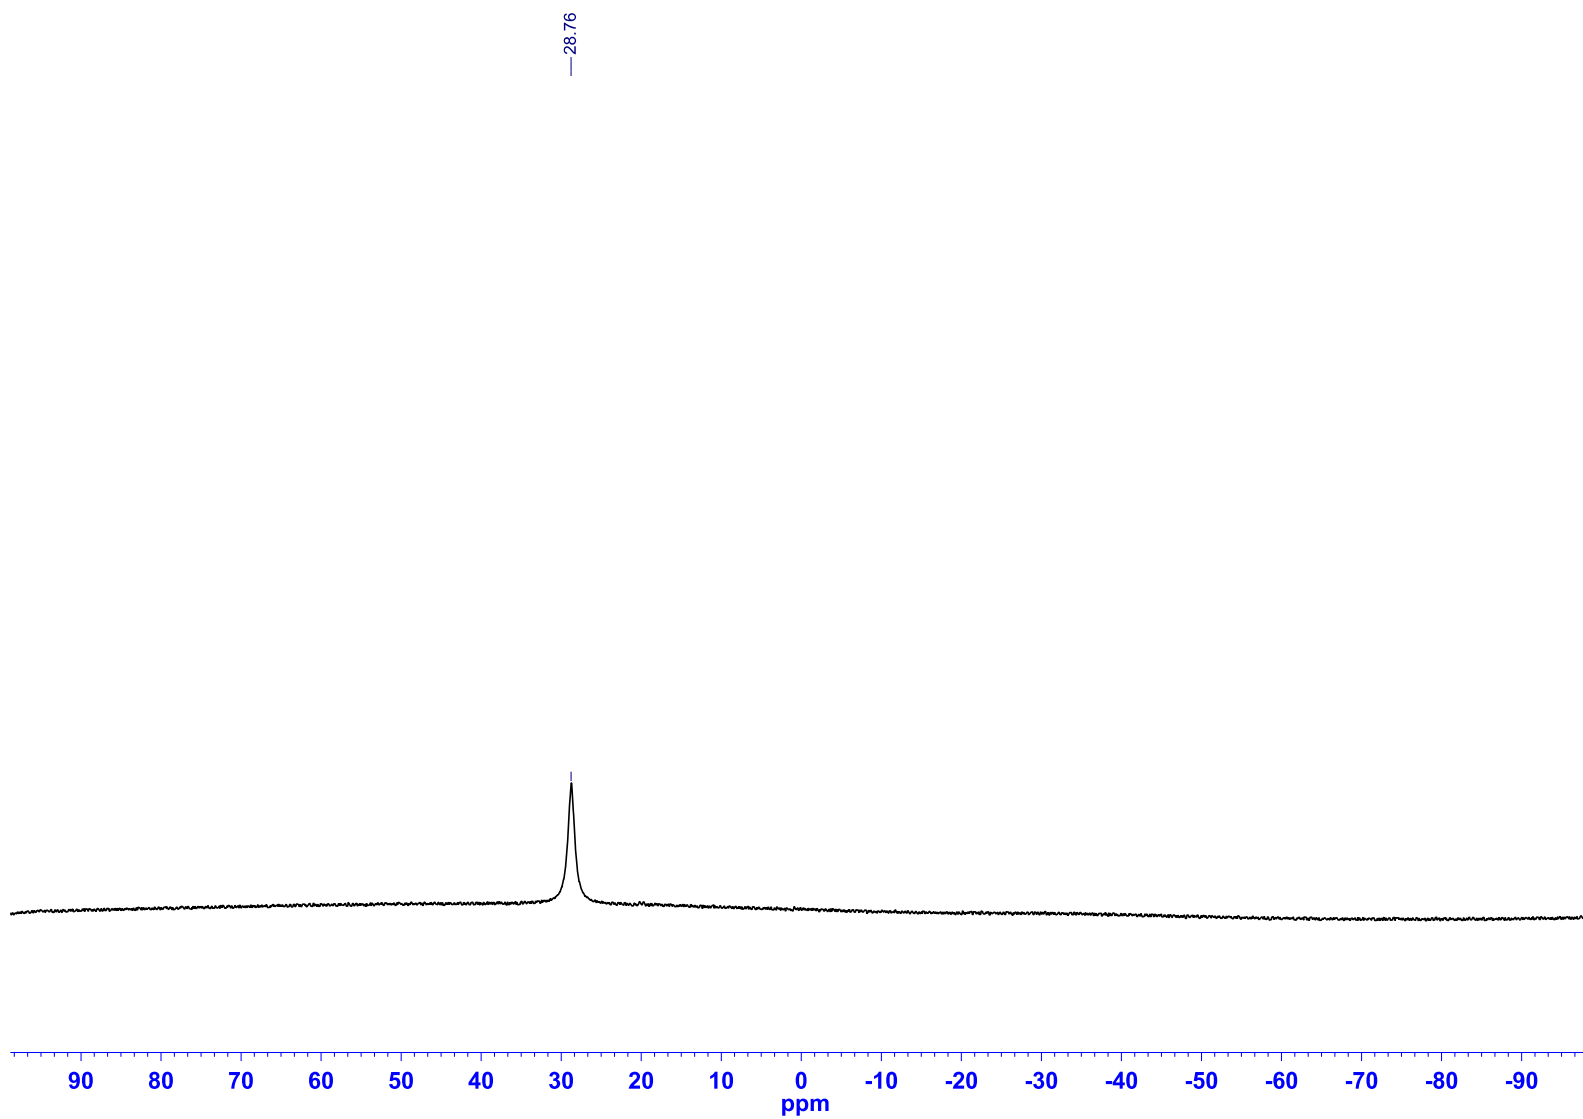



$^{19}\text{F}$  NMR (282.4 MHz,  $\text{CDCl}_3$ ) of 2-(4-fluorophenyl)-1-methy-2,3-dihydro-1*H*-1,3,2-benzodiazaborole (**5g**)

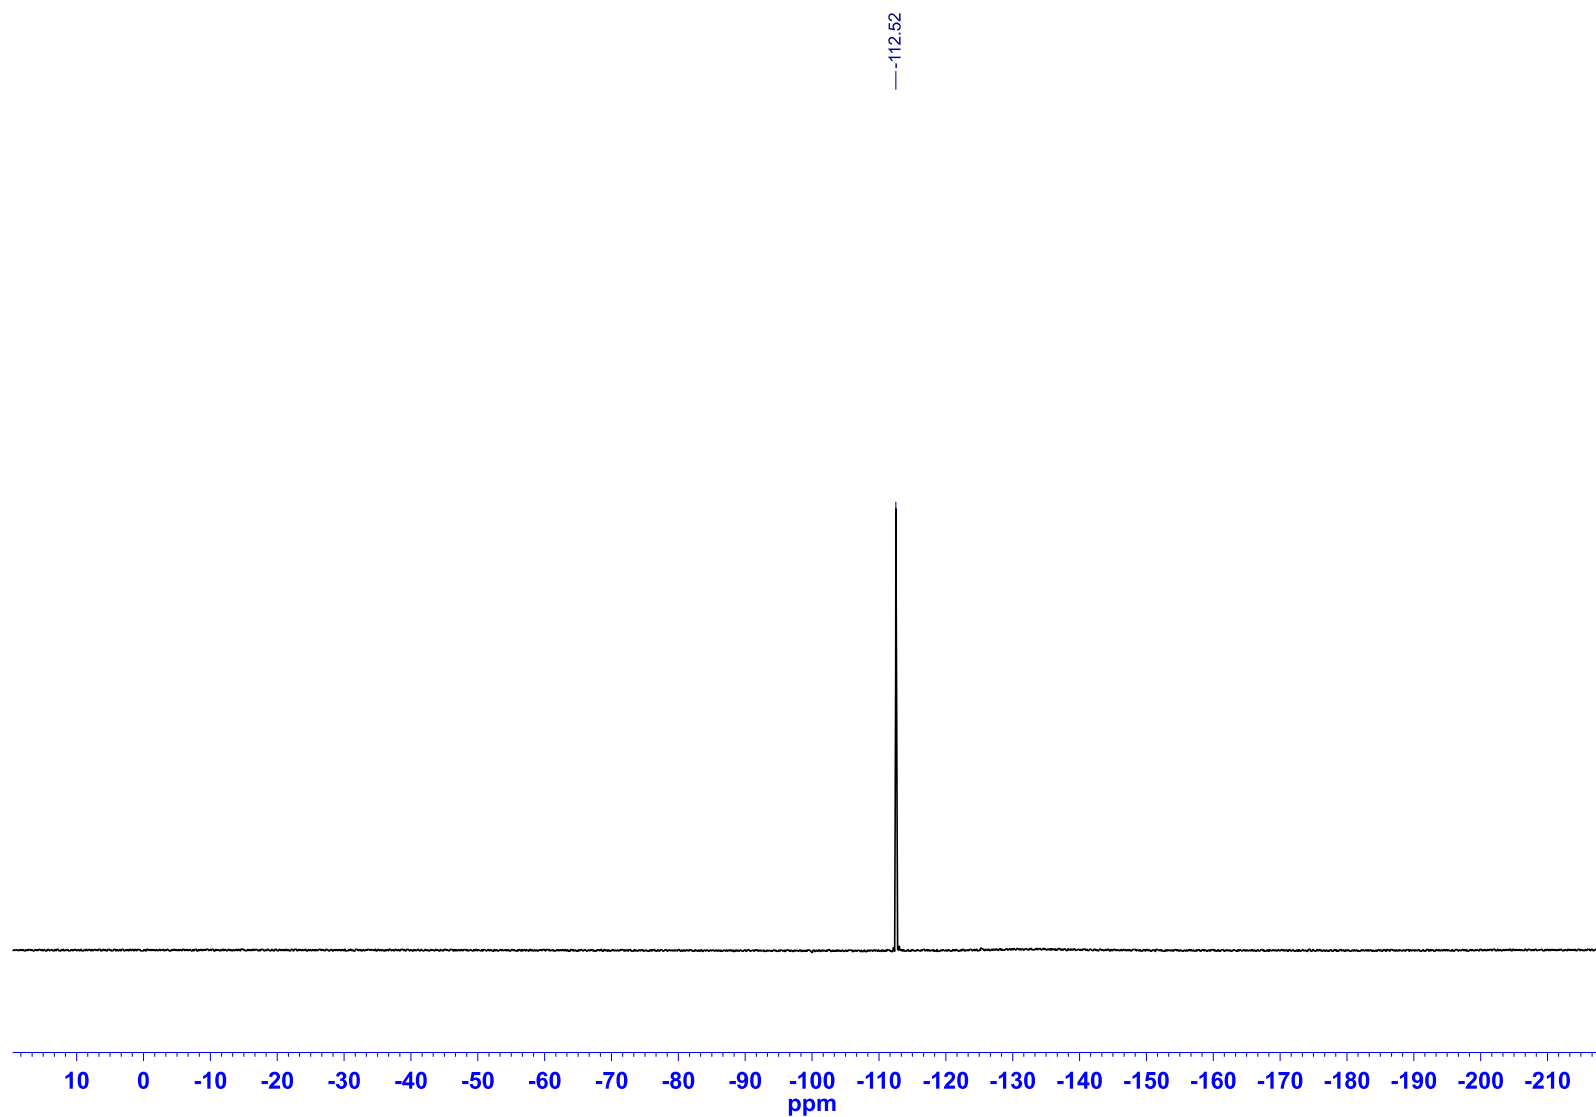

$^1\text{H}$  NMR (500.4 MHz,  $\text{DMSO-}d_6$ ) of 2-(3-vinylphenyl)-2,3-dihydro-1*H*-1,3,2-benzodiazaborole (**5h**)

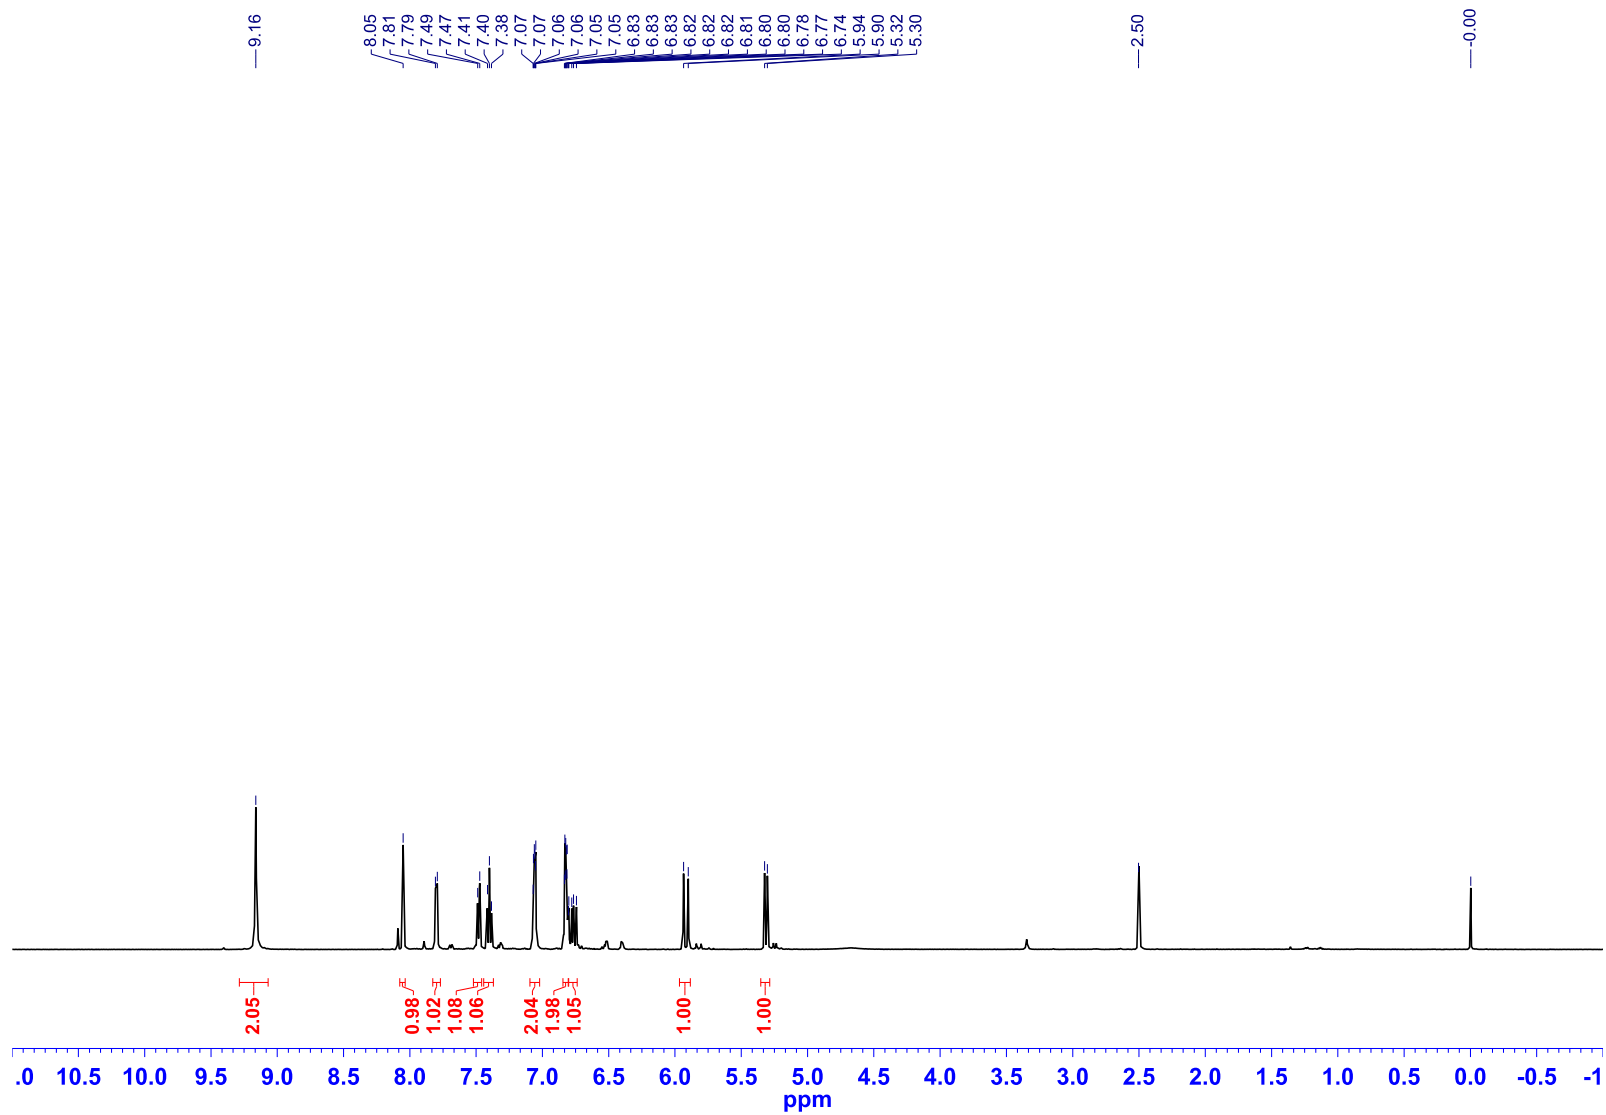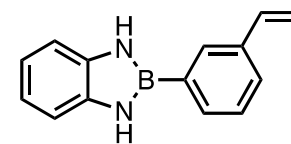

$^{13}\text{C}$  NMR (125.8 MHz,  $\text{DMSO-}d_6$ ) of 2-(3-vinylphenyl)-2,3-dihydro-1*H*-1,3,2-benzodiazaborole (**5h**)

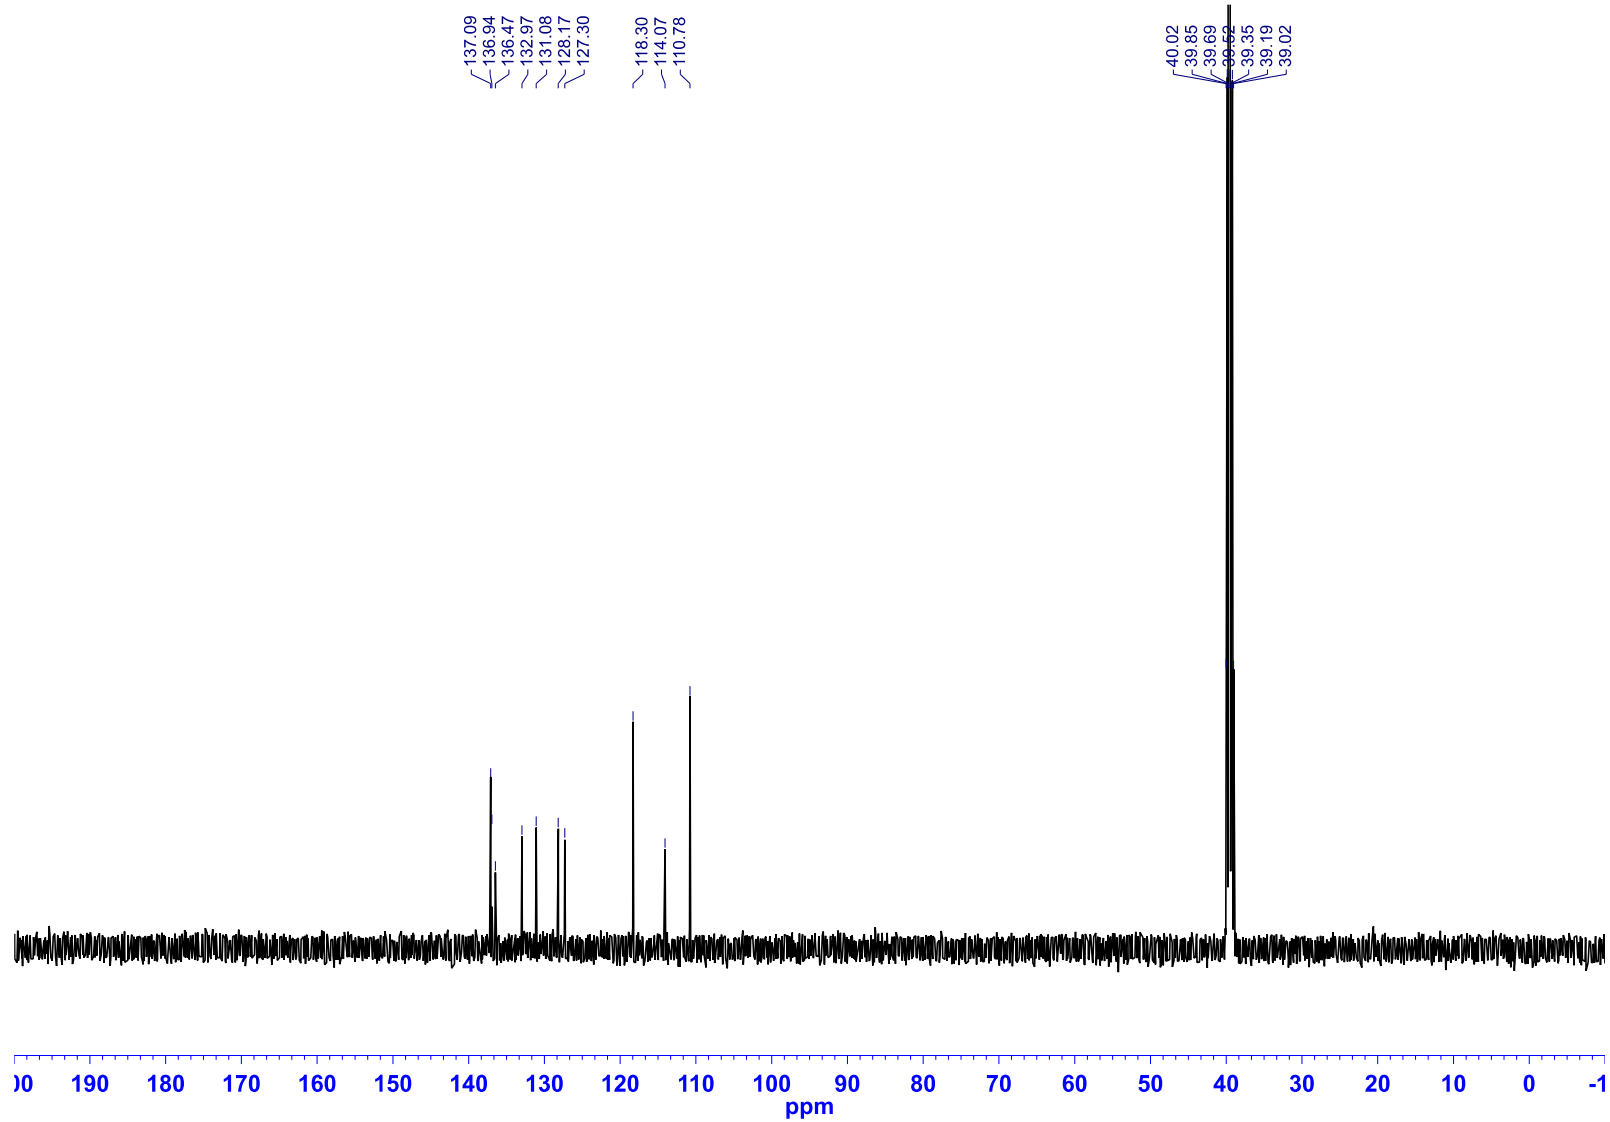

$^{11}\text{B}$  NMR (128.4 MHz, MeCN) of 2-(3-vinylphenyl)-2,3-dihydro-1*H*-1,3,2-benzodiazaborole (**5h**)

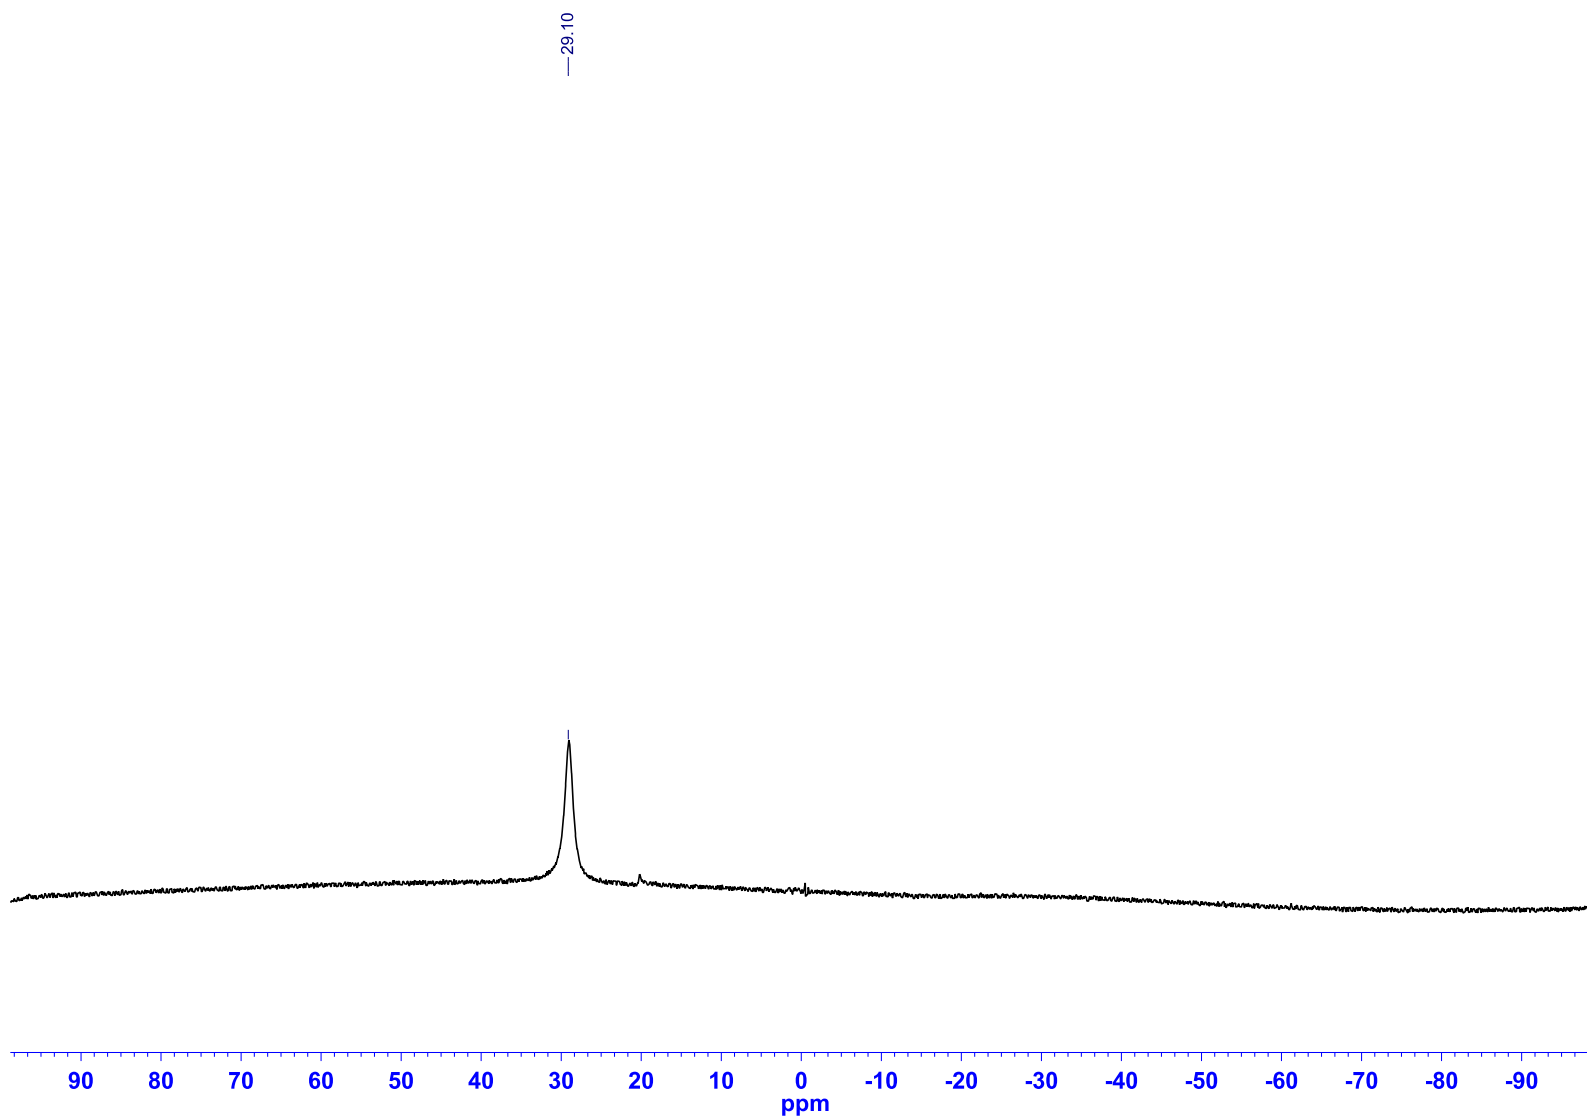

$^1\text{H}$  NMR (500.4 MHz,  $\text{DMSO-}d_6$ ) of 2-(2-methoxyphenyl)-2,3-dihydro-1H-1,3,2-benzodiazaborole (**5i**)

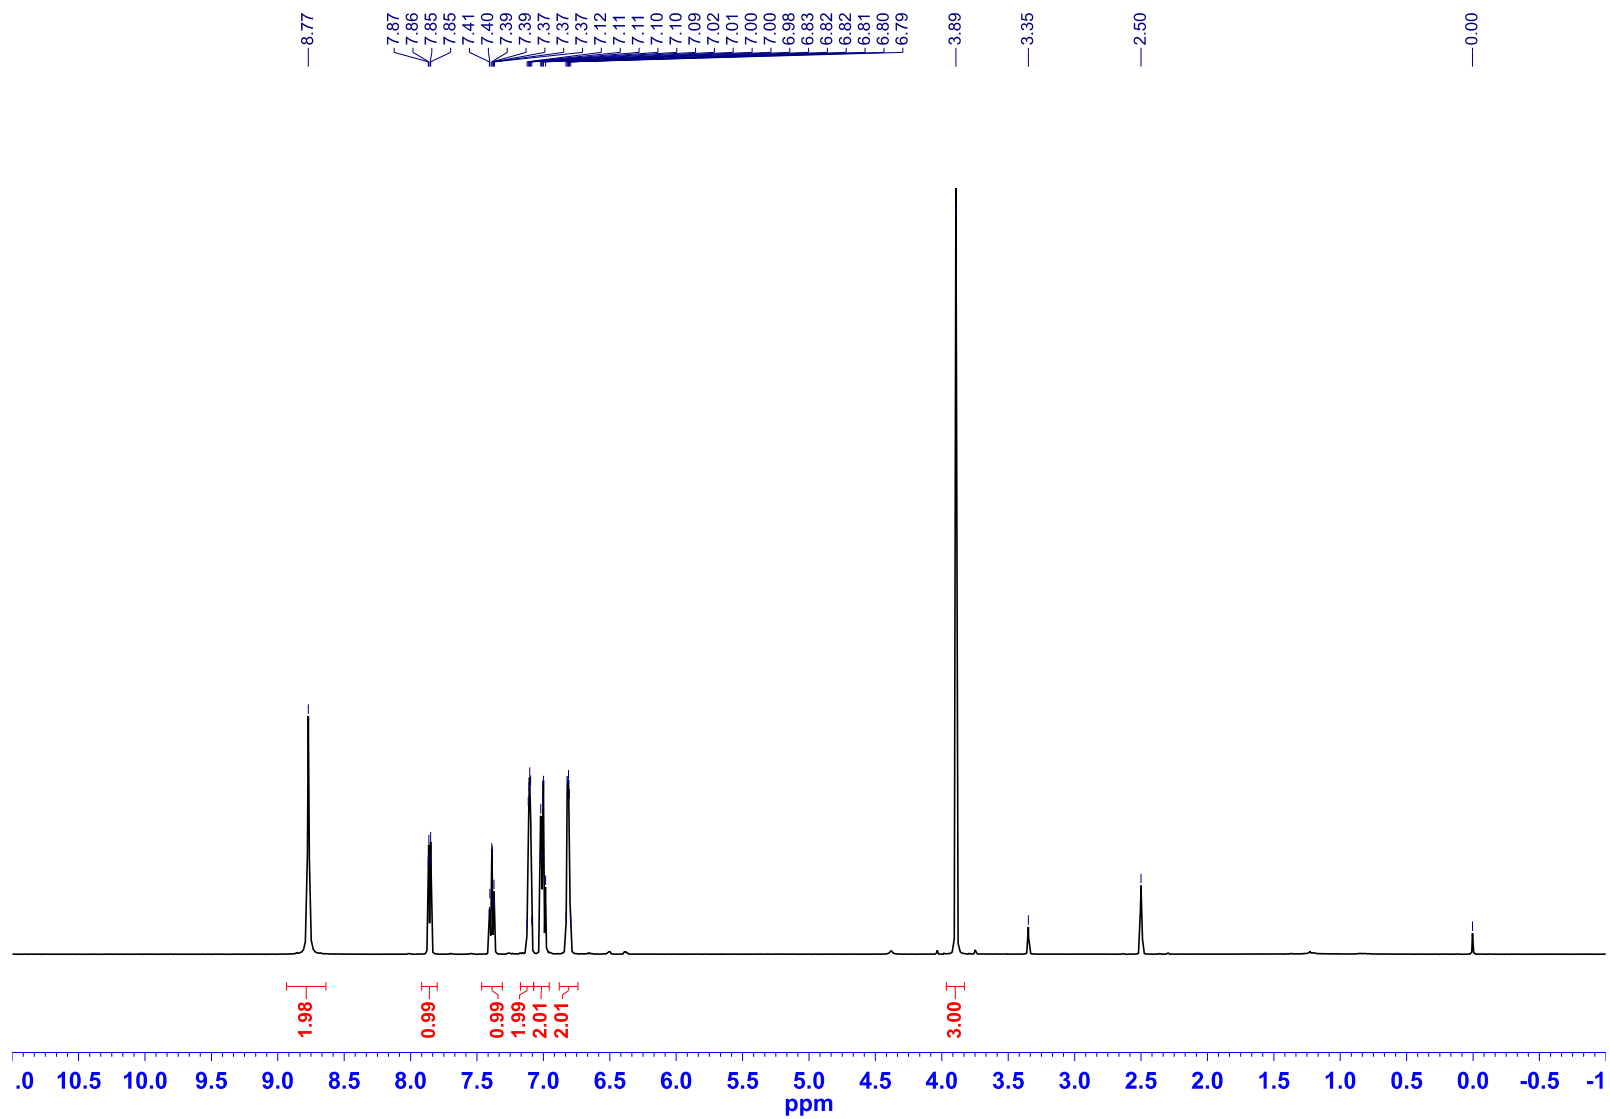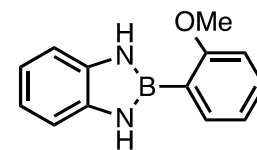

$^{13}\text{C}$  NMR (125.8 MHz,  $\text{DMSO-}d_6$ ) of 2-(2-methoxyphenyl)-2,3-dihydro-1*H*-1,3,2-benzodiazaborole (**5i**)

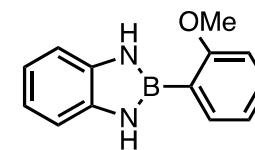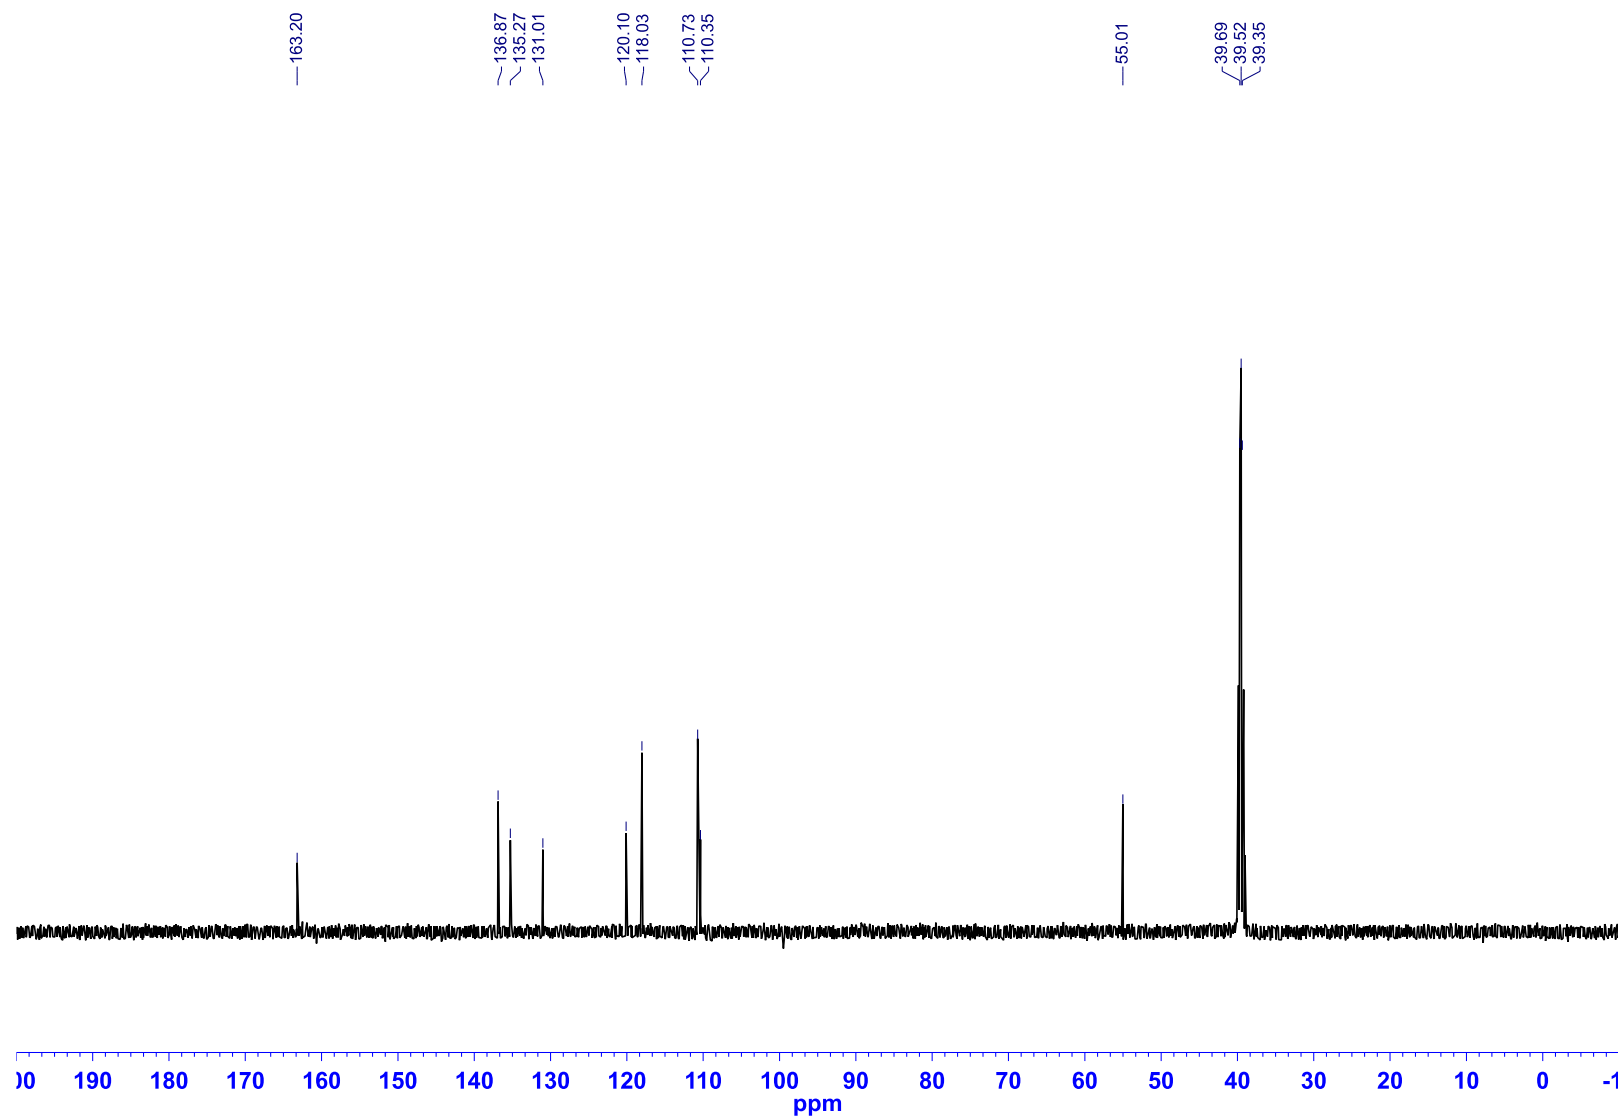

$^{11}\text{B}$  NMR (128.4 MHz, MeCN) of 2-(2-methoxyphenyl)-2,3-dihydro-1*H*-1,3,2-benzodiazaborole (**5i**)

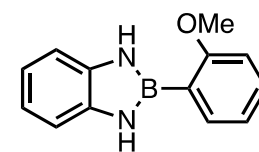

—27.93

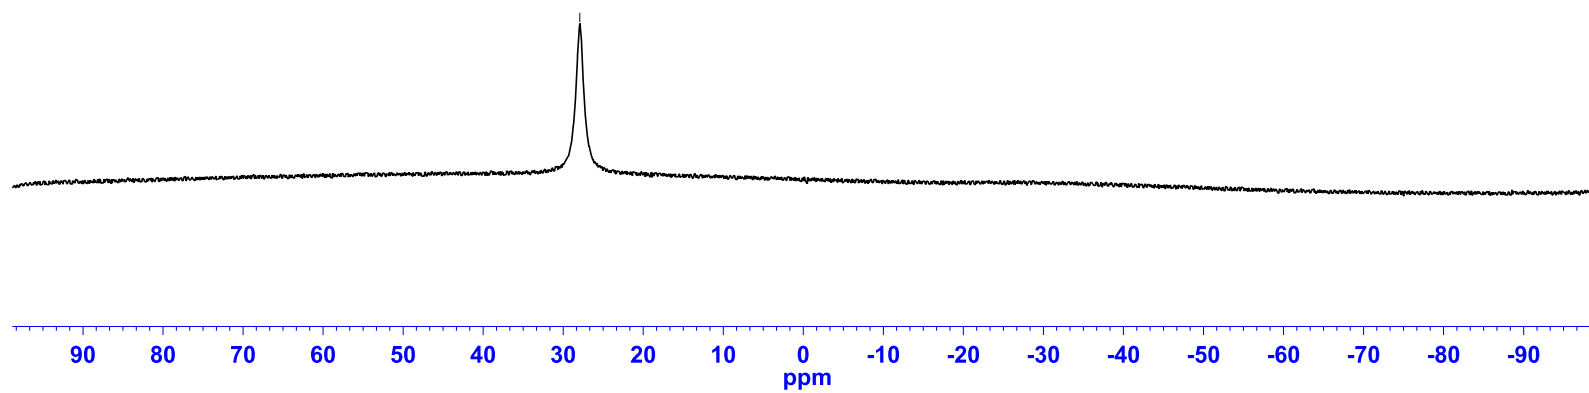

$^1\text{H}$  NMR (500.4 MHz,  $\text{DMSO-}d_6$ ) of 2-(3-methoxyphenyl)-2,3-dihydro-1*H*-1,3,2-benzodiazaborole (**5j**)

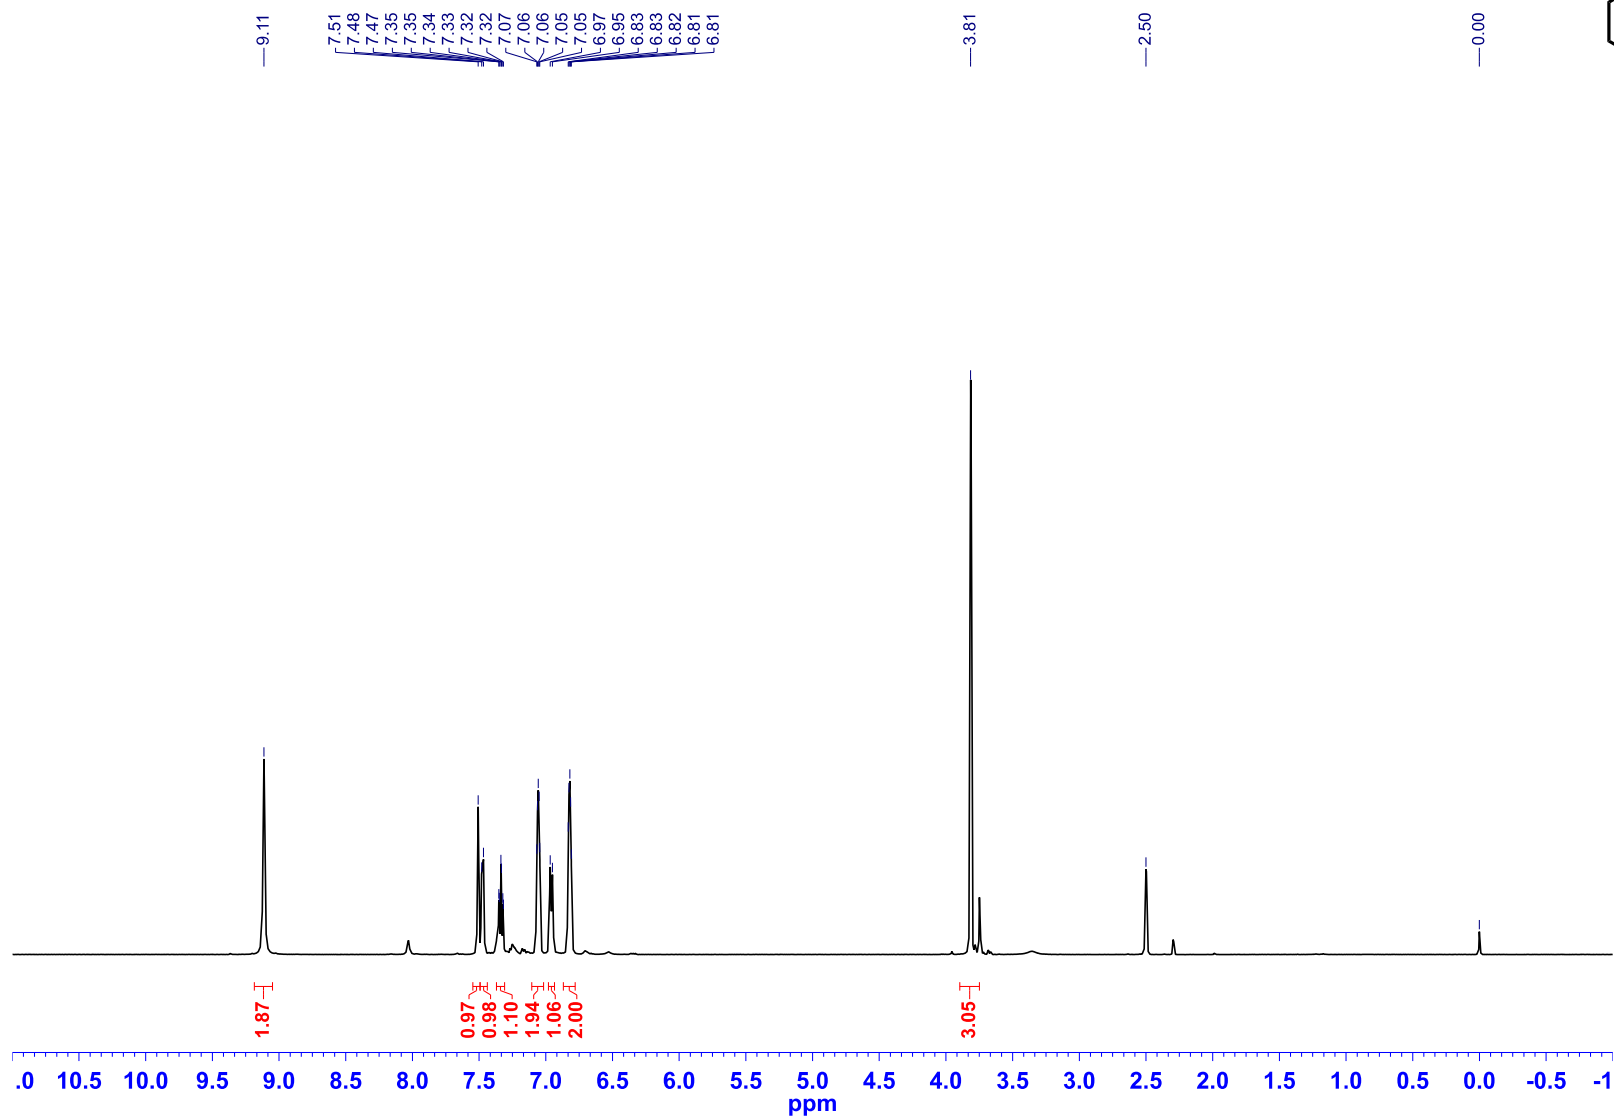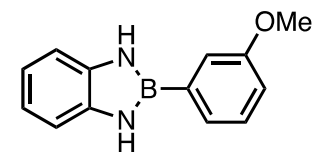



$^{13}\text{C}$  NMR (125.8 MHz,  $\text{DMSO-}d_6$ ) of 2-(3-methoxyphenyl)-2,3-dihydro-1*H*-1,3,2-benzodiazaborole (**5j**)

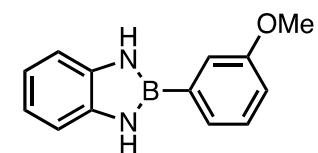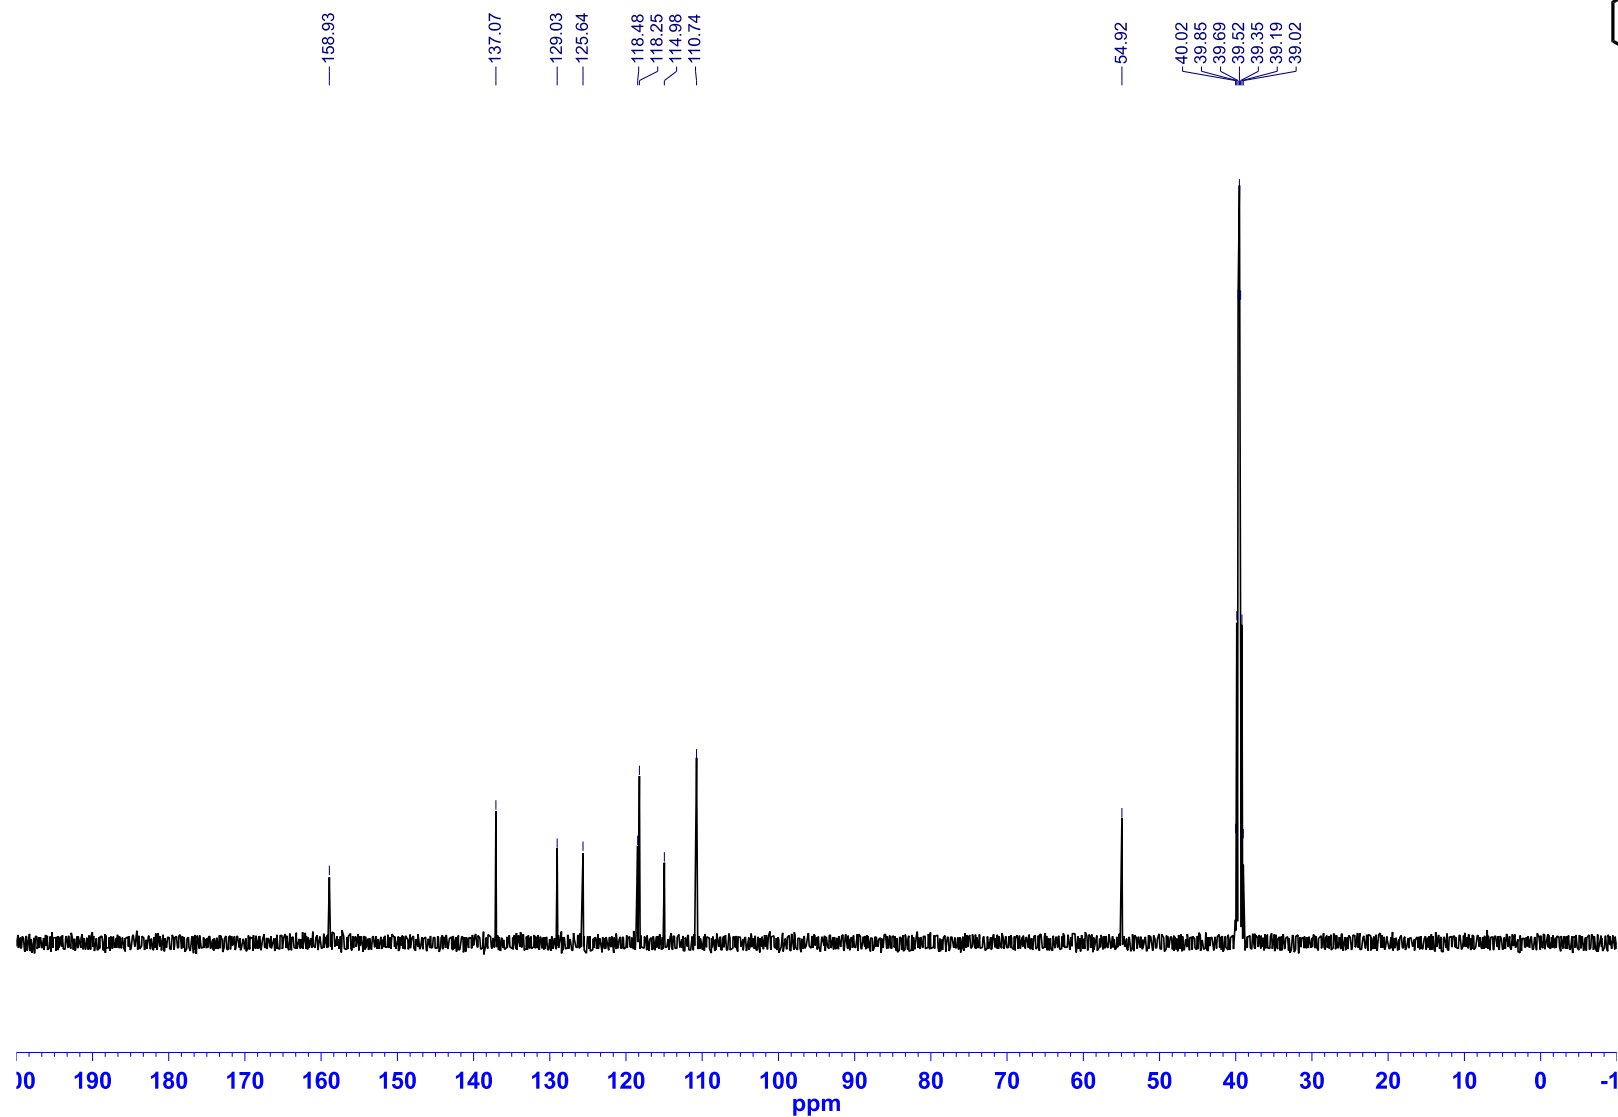

$^{11}\text{B}$  NMR (128.4 MHz, MeCN) of 2-(3-methoxyphenyl)-2,3-dihydro-1*H*-1,3,2-benzodiazaborole (**5j**)

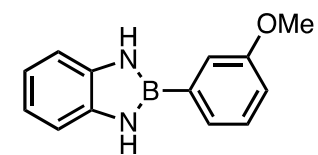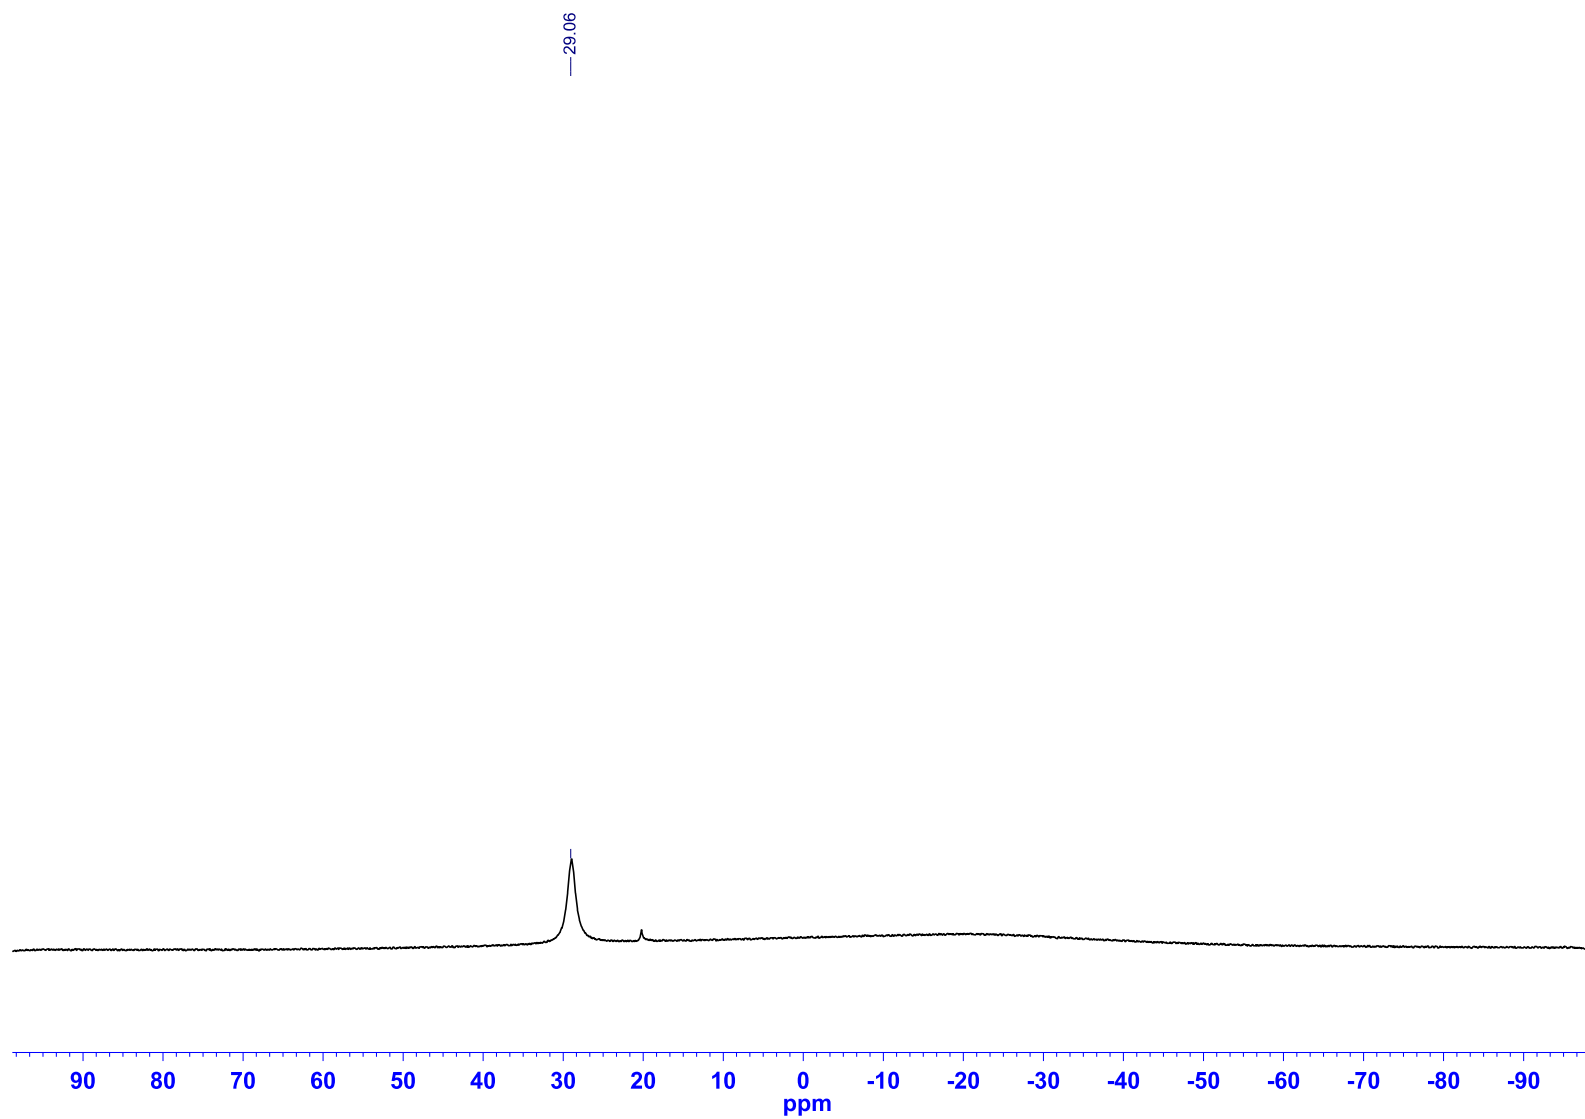

$^1\text{H}$  NMR (500.4 MHz,  $\text{CDCl}_3$ ) of 2-(3-methoxyphenyl)-1-methyl-2,3-dihydro-1*H*-1,3,2-benzodiazaborole (**5k**)

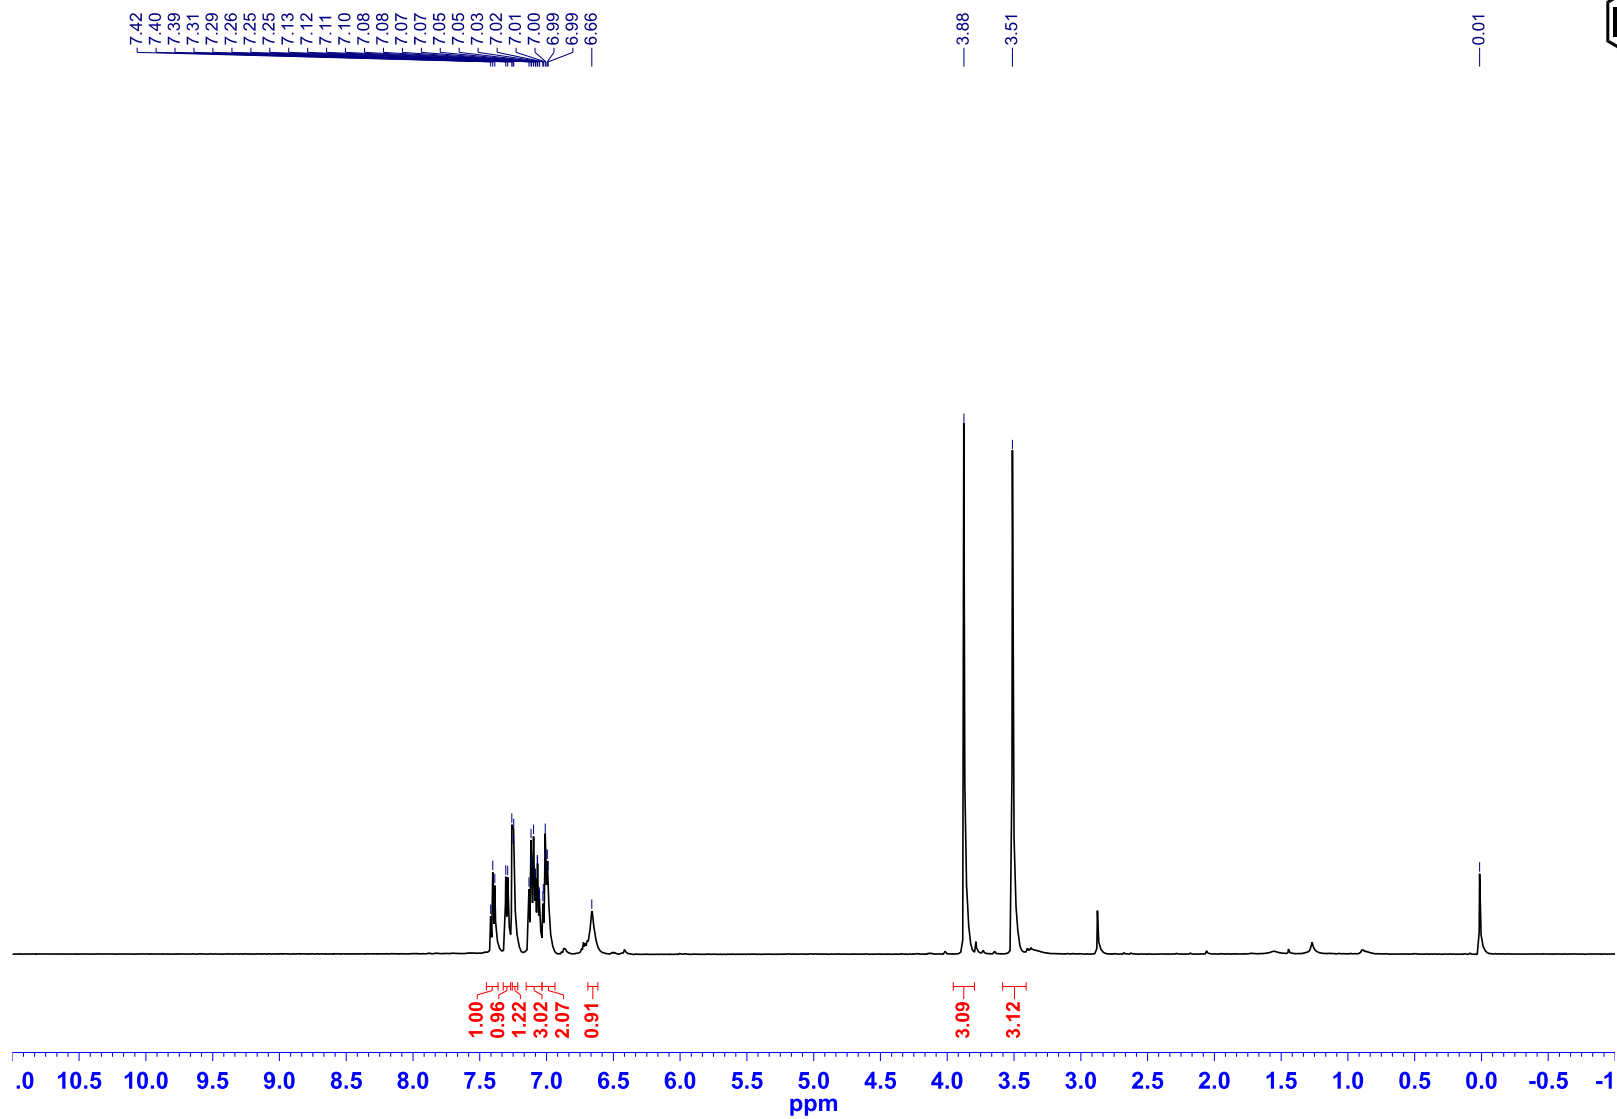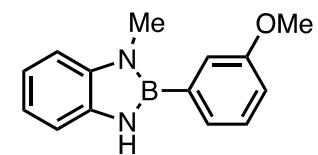

$^{13}\text{C}$  NMR (125.8 MHz,  $\text{CDCl}_3$ ) of 2-(3-methoxyphenyl)-1-methyl-2,3-dihydro-1*H*-1,3,2-benzodiazaborole (**5k**)

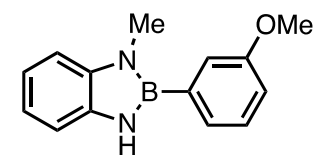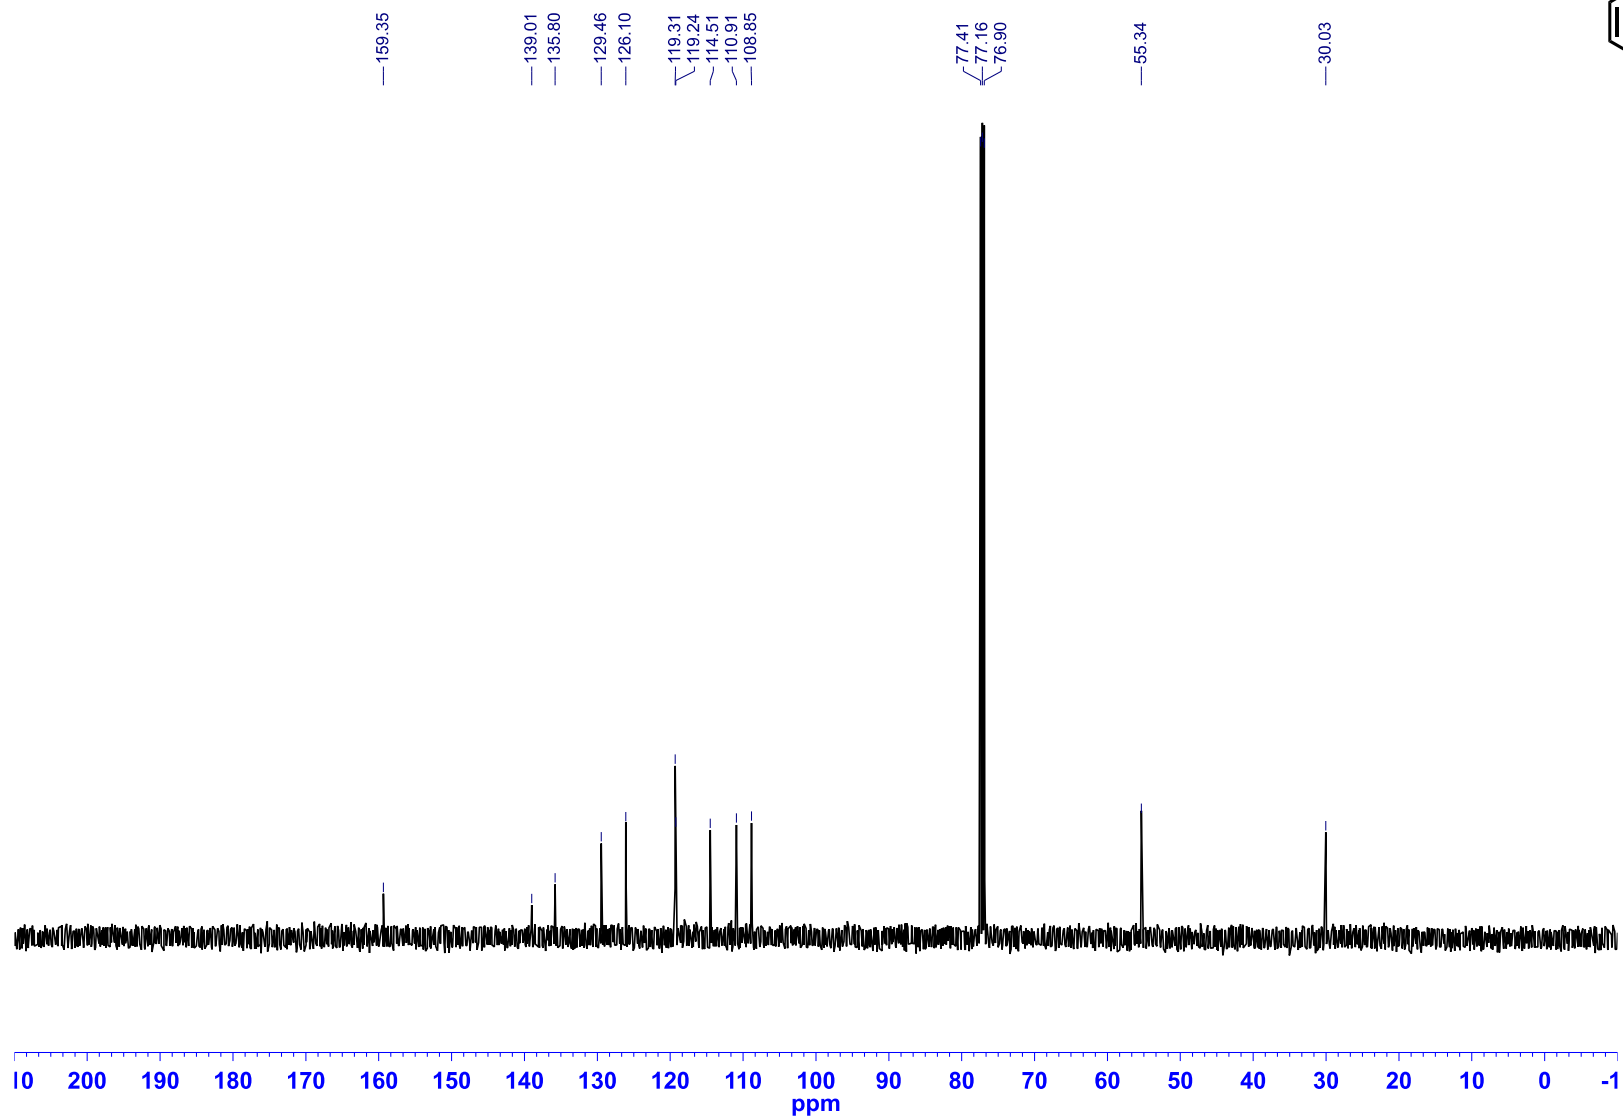

$^{11}\text{B}$  NMR (128.4 MHz, MeCN) of 2-(3-methoxyphenyl)-1-methyl-2,3-dihydro-1*H*-1,3,2-benzodiazaborole (**5k**)

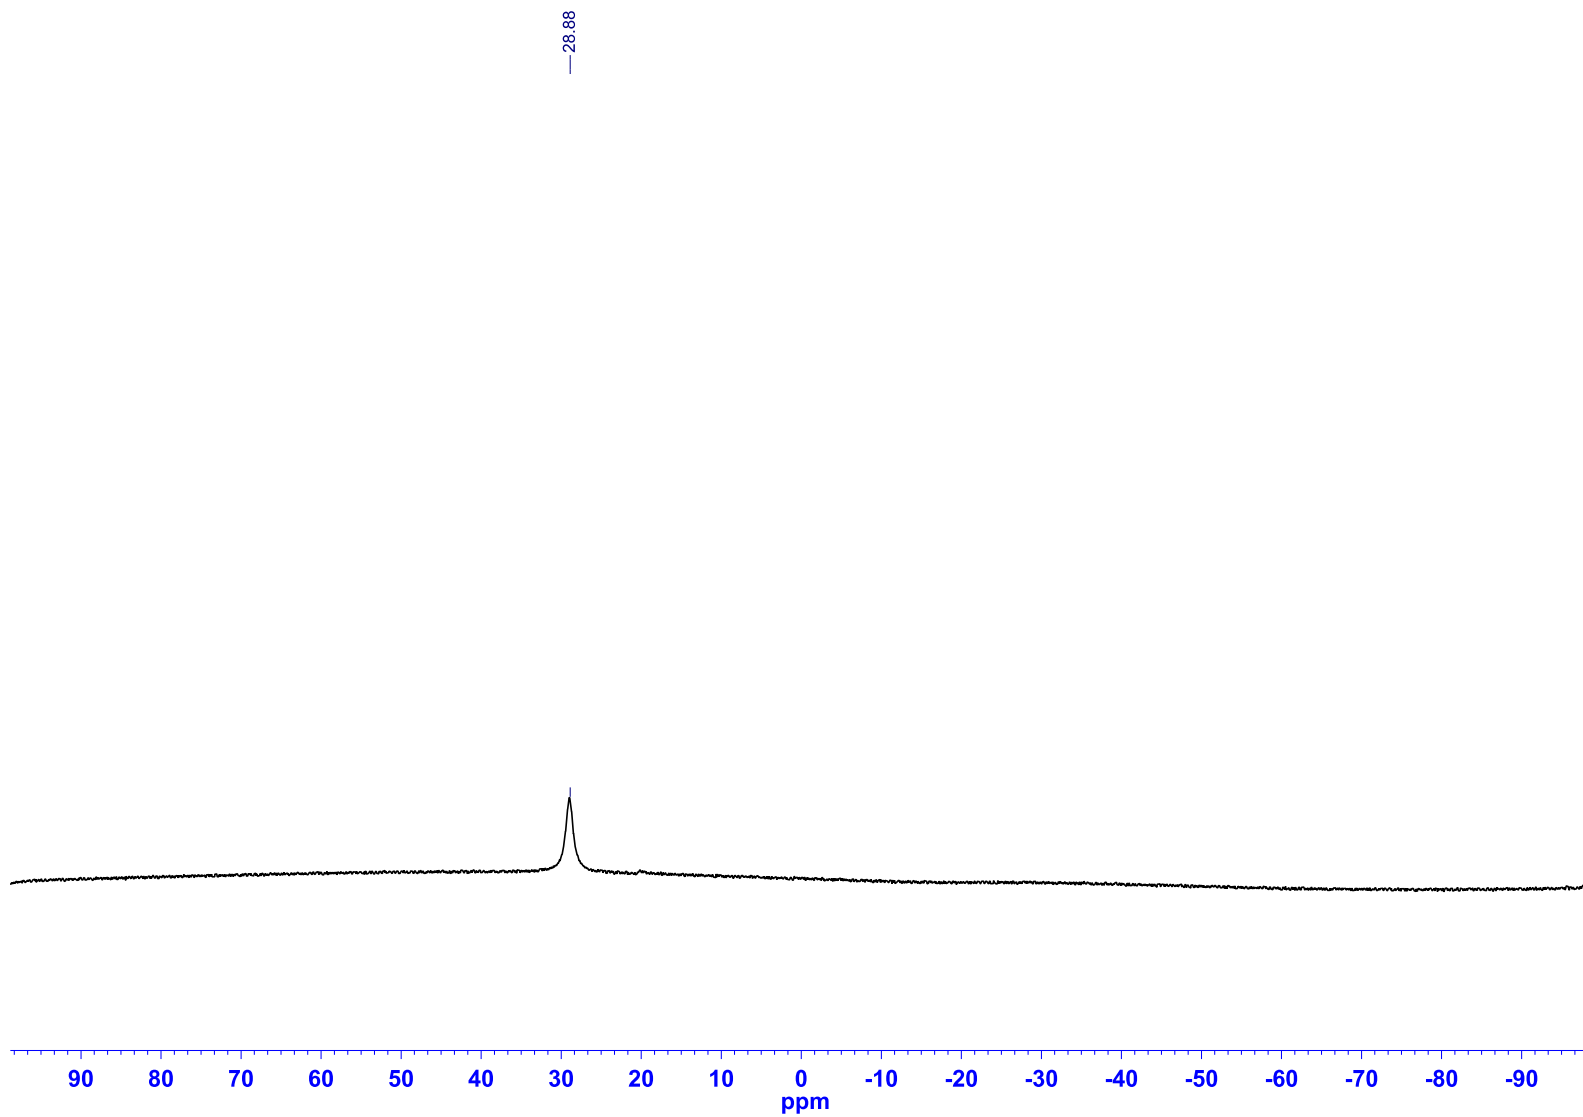

$^1\text{H}$  NMR (500.4 MHz,  $\text{CDCl}_3$ ) of 2-(2-phenoxyphenyl)-2,3-dihydro-1*H*-1,3,2-benzodiazaborole (**51**)

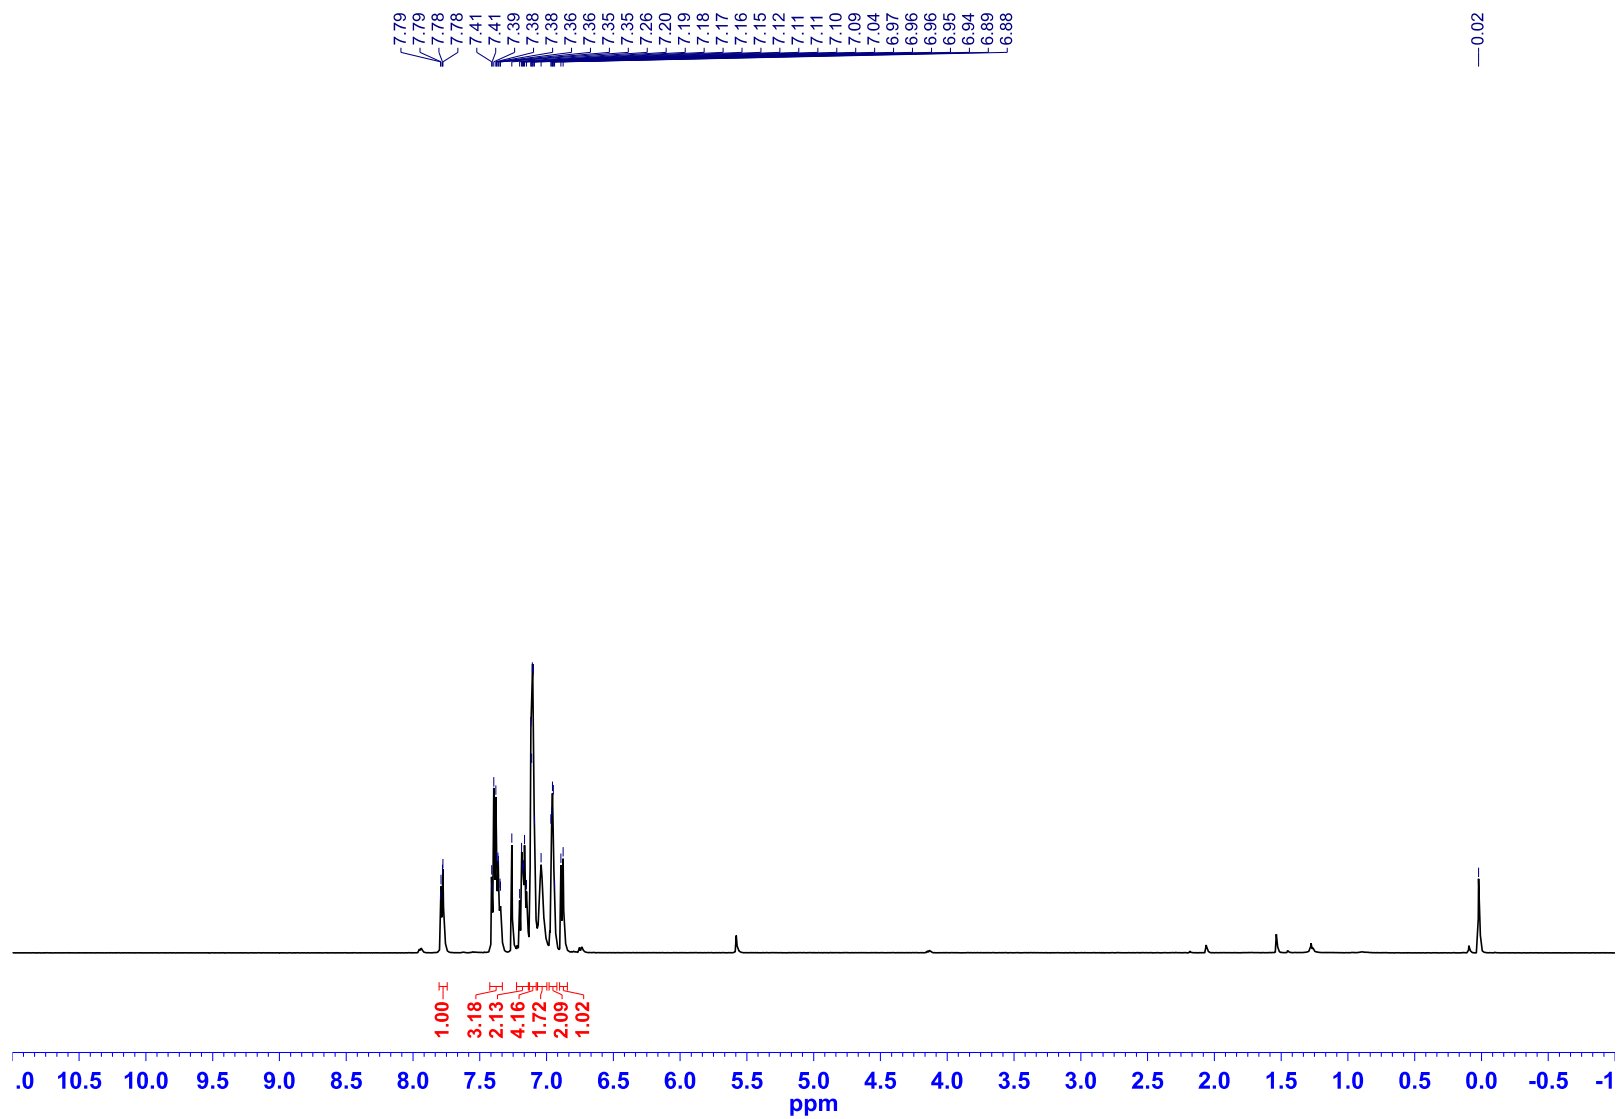

$^{13}\text{C}$  NMR (125.8 MHz,  $\text{CDCl}_3$ ) of 2-(2-phenoxyphenyl)-2,3-dihydro-1*H*-1,3,2-benzodiazaborole (**5I**)

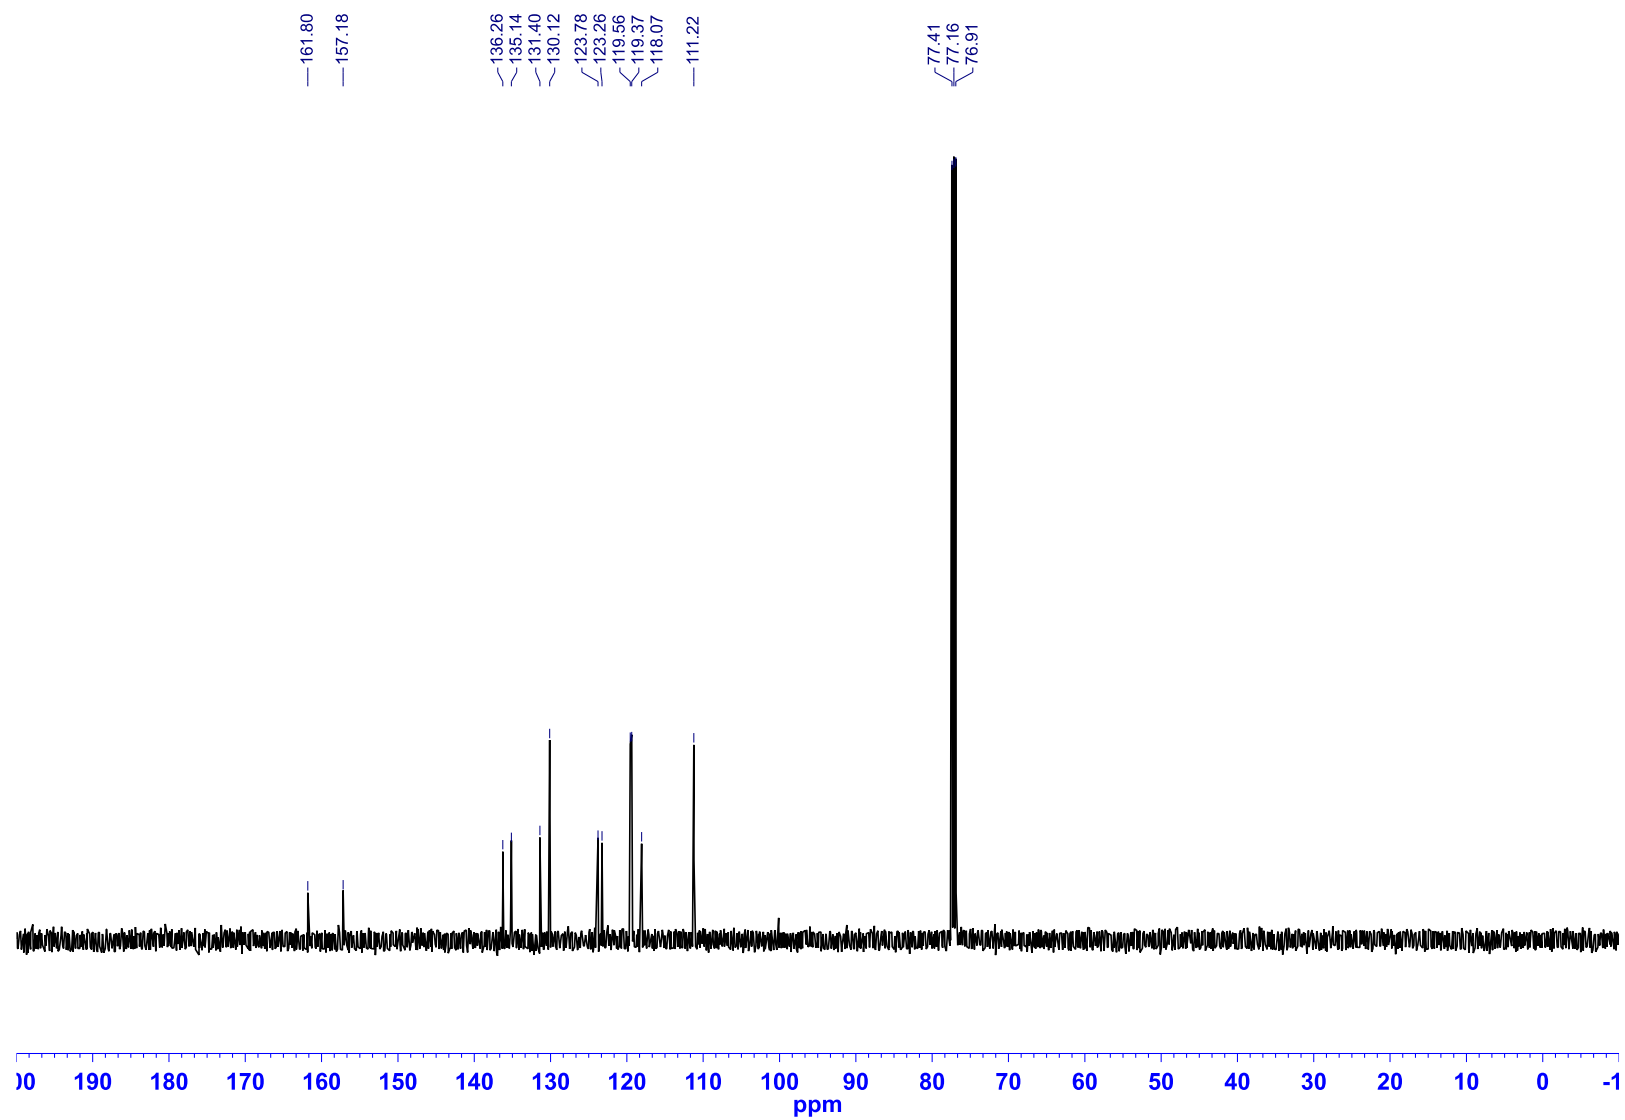

$^{11}\text{B}$  NMR (128.4 MHz,  $\text{CDCl}_3$ ) of 2-(2-phenoxyphenyl)-2,3-dihydro-1*H*-1,3,2-benzodiazaborole (**51**)

—27.26

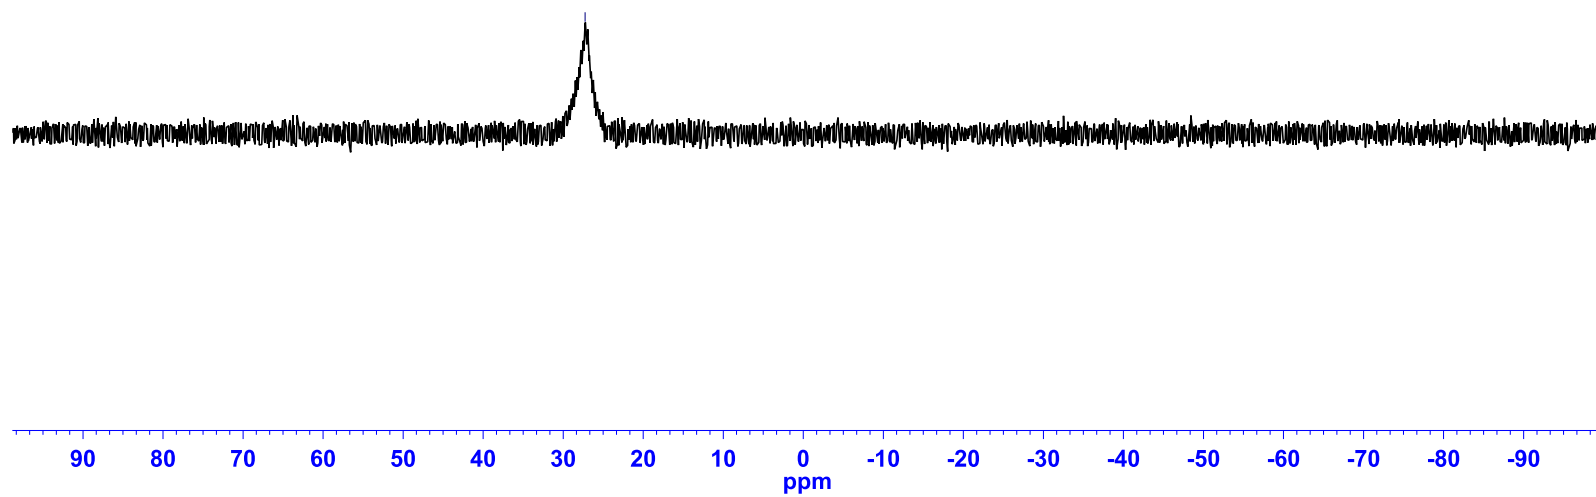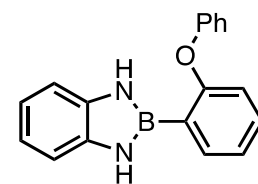



$^1\text{H}$  NMR (500.4 MHz,  $\text{DMSO-}d_6$ ) of 2-(4-(methoxycarbonyl)phenyl)-2,3-dihydro-1*H*-1,3,2-benzodiazaborole (**5m**)

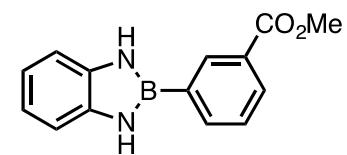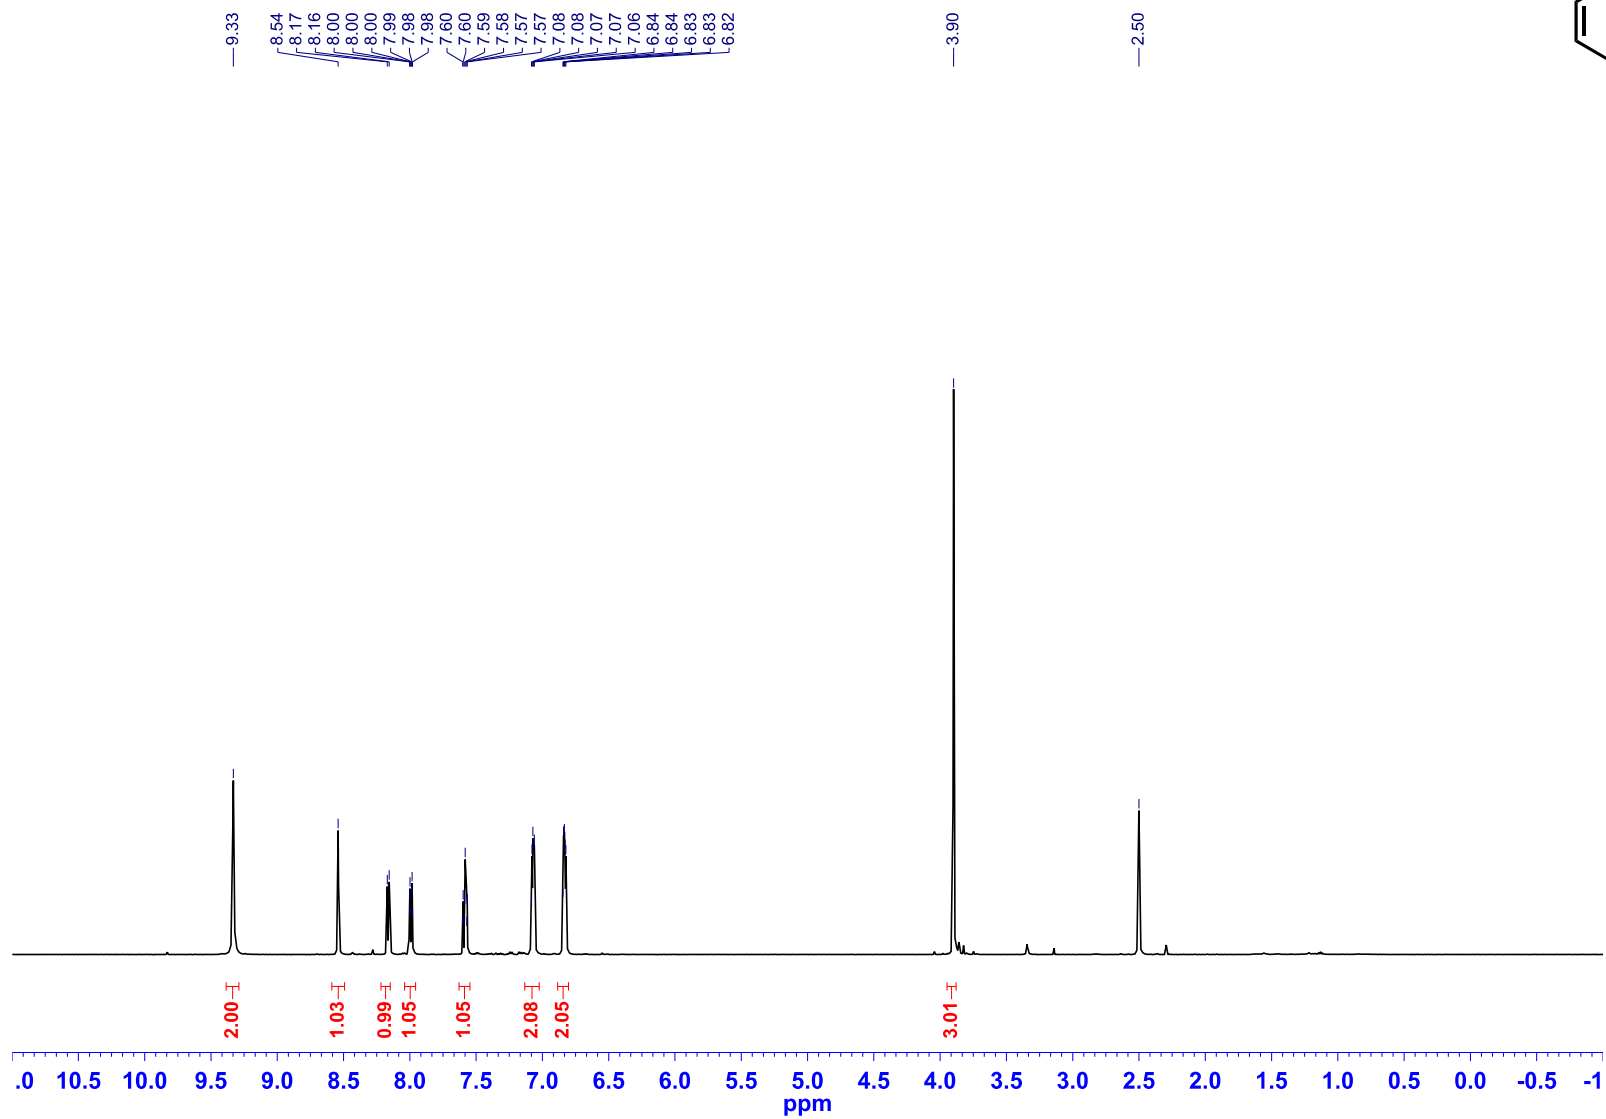

$^{13}\text{C}$  NMR (125.8 MHz,  $\text{DMSO-}d_6$ ) of 2-(4-(methoxycarbonyl)phenyl)-2,3-dihydro-1*H*-1,3,2-benzodiazaborole (**5m**)

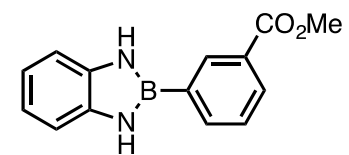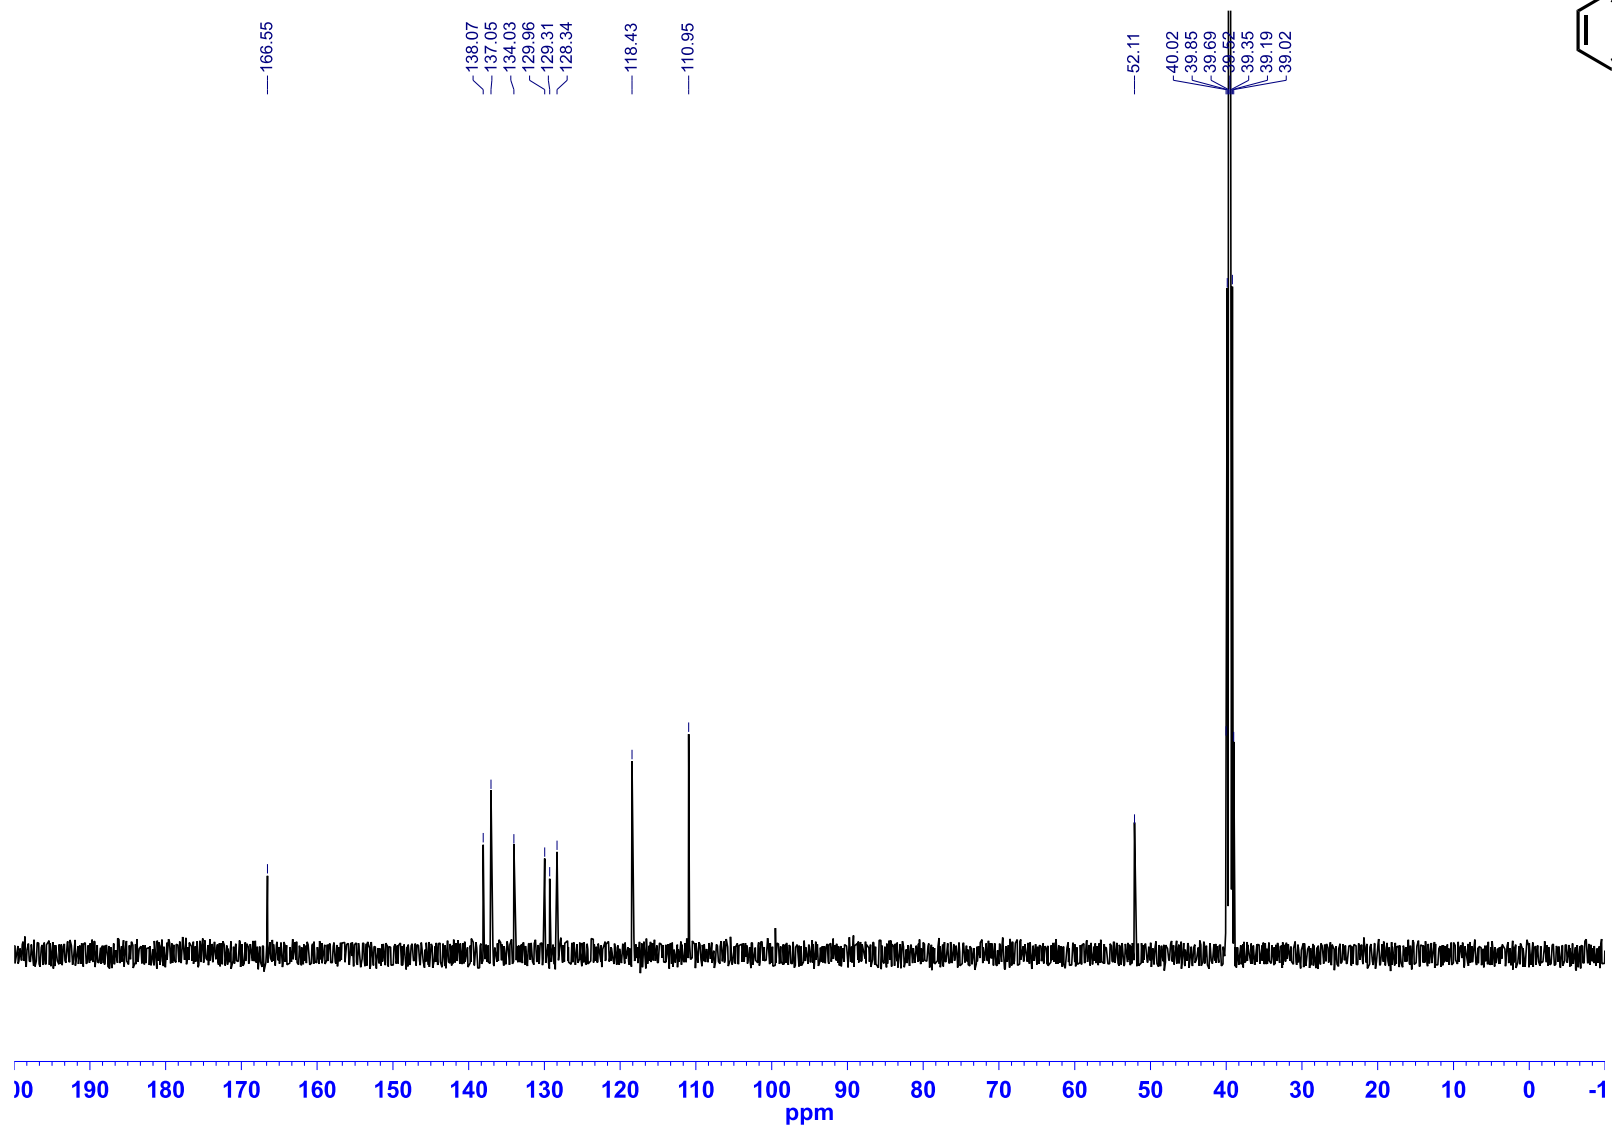

$^{11}\text{B}$  NMR (128.4 MHz, MeCN) of 2-(4-(methoxycarbonyl)phenyl)-2,3-dihydro-1*H*-1,3,2-benzodiazaborole (**5m**)

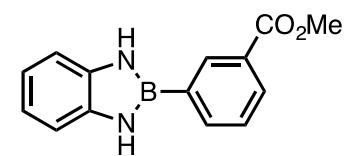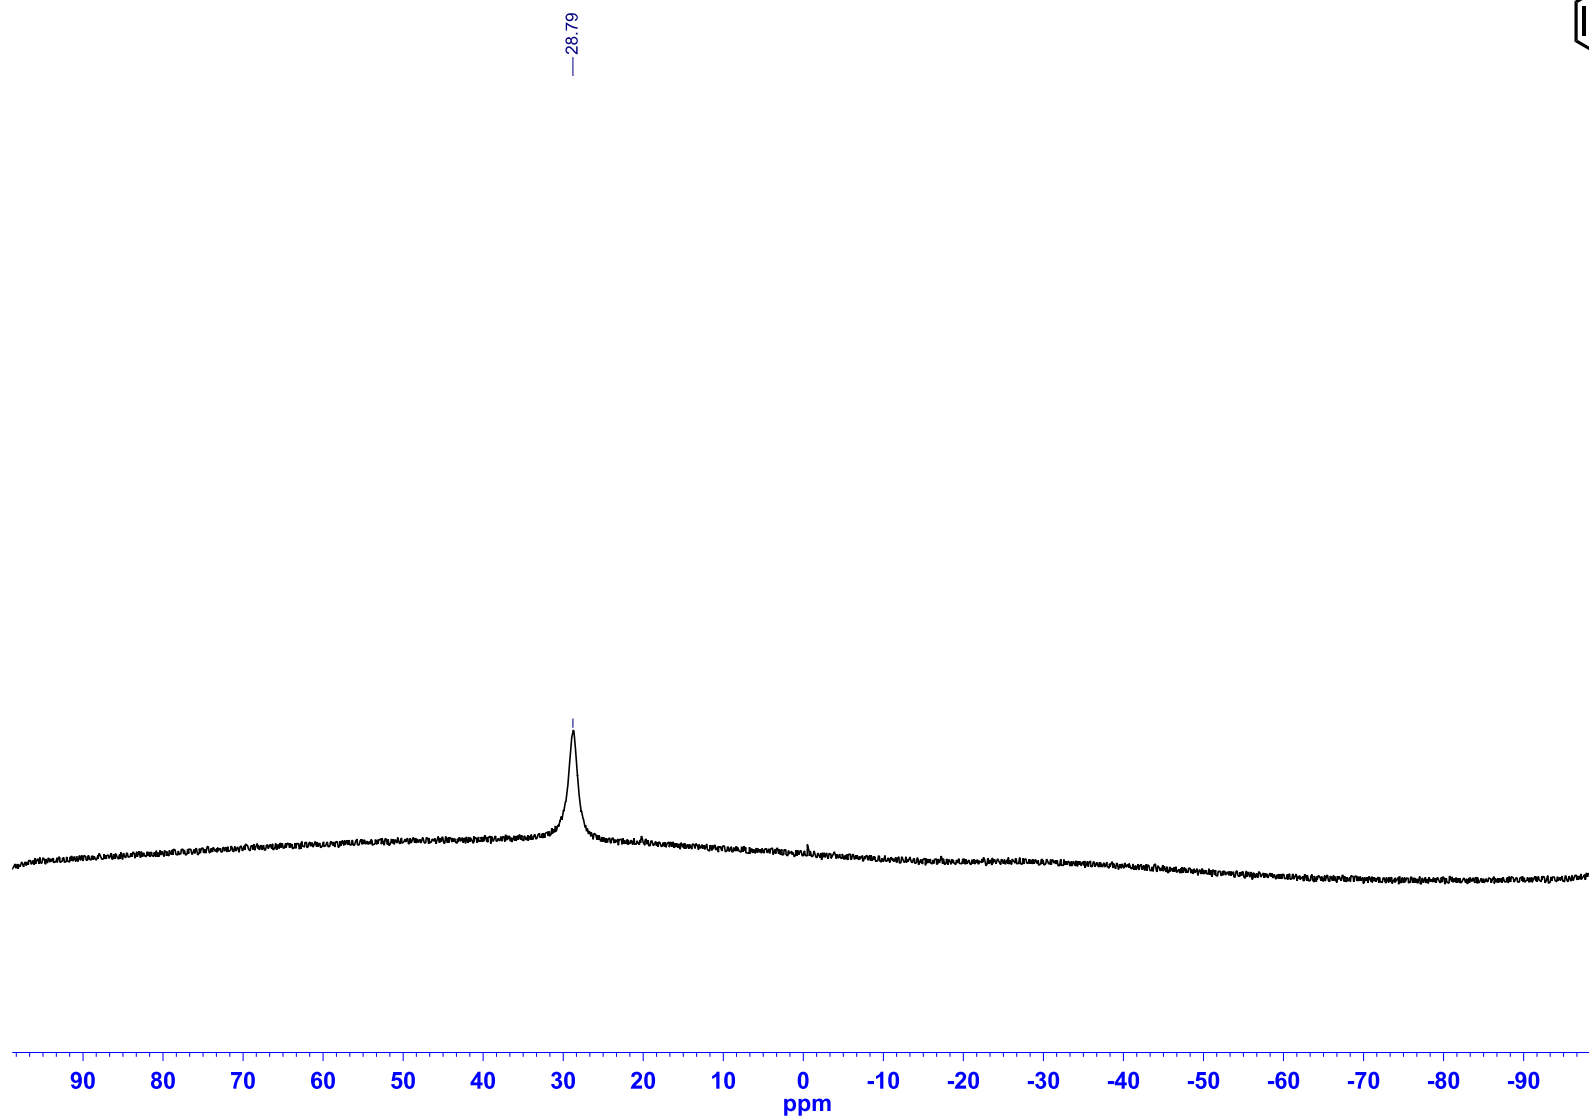

$^1\text{H}$  NMR (500.4 MHz,  $\text{CDCl}_3$ ) of 2-(2,3-dihydrobenzo[1,4]dioxin-5-yl)-1-methyl-2,3-dihydro-1*H*-1,3,2-benzodiazaborole (**5n**)

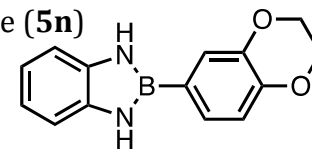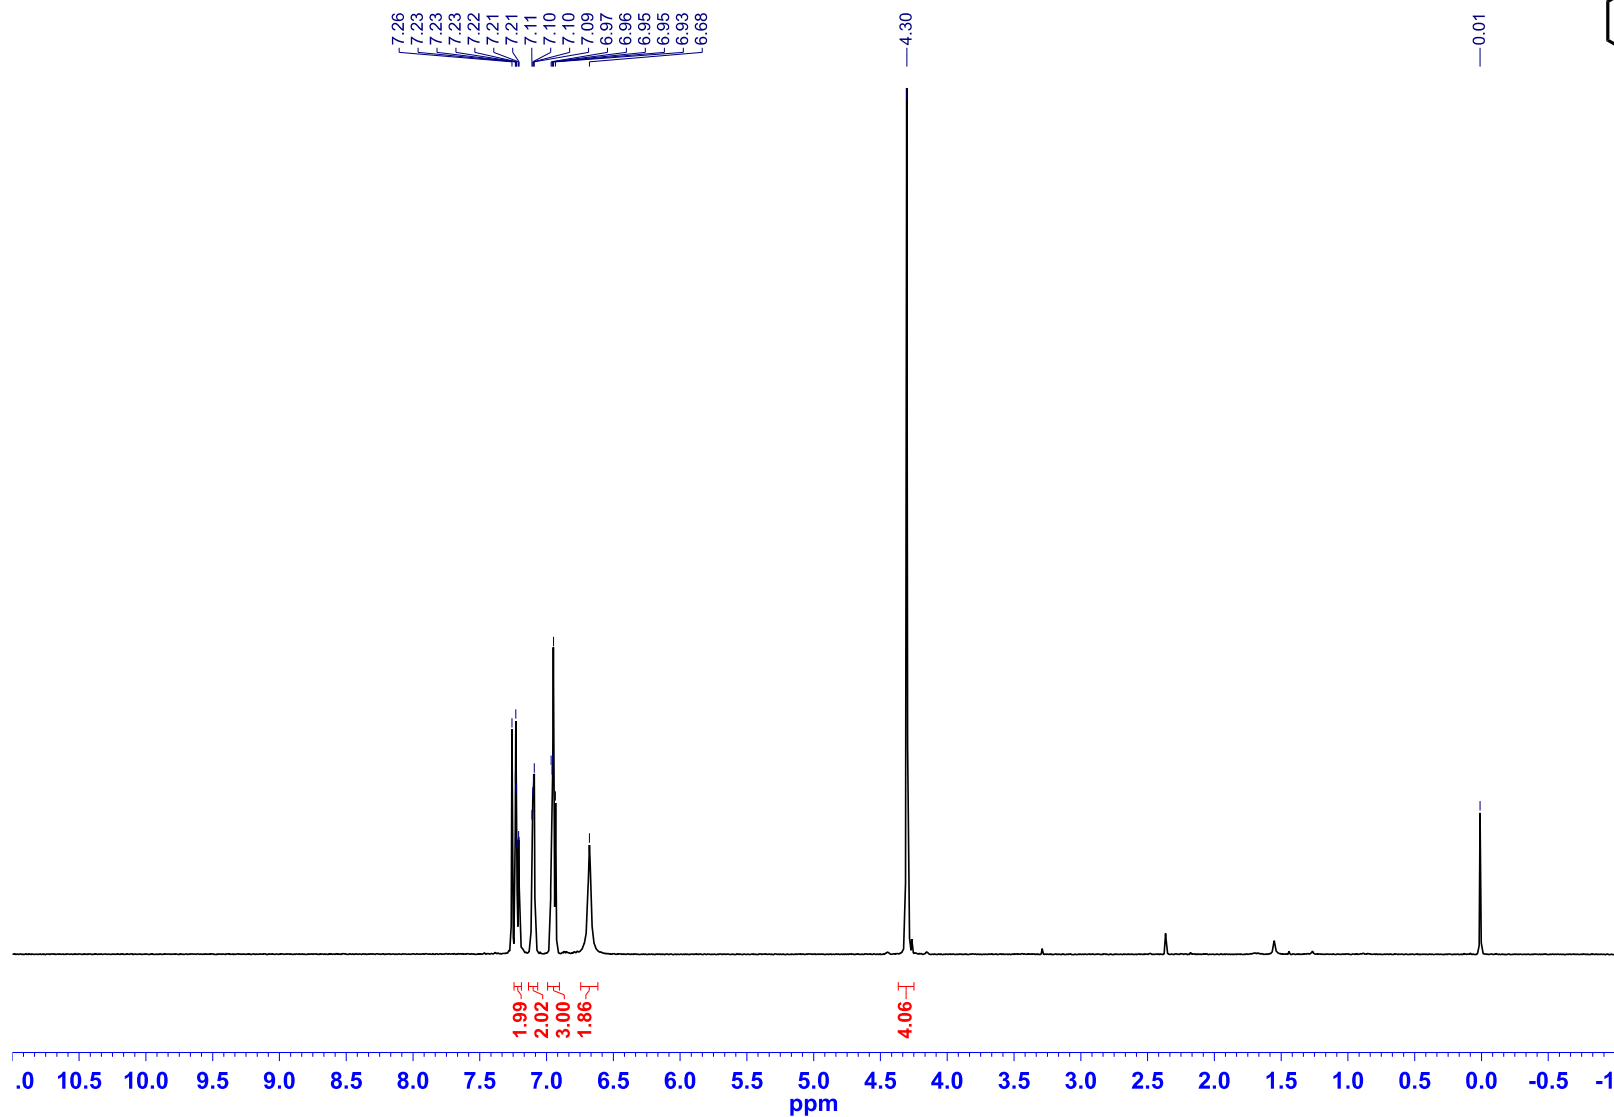

$^{13}\text{C}$  NMR (125.8 MHz,  $\text{CDCl}_3$ ) of 2-(2,3-dihydrobenzo[1,4]dioxin-5-yl)-1-methyl-2,3-dihydro-1*H*-1,3,2-benzodiazaborole (**5n**)

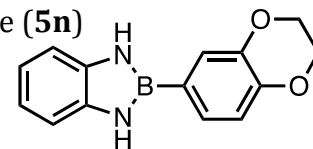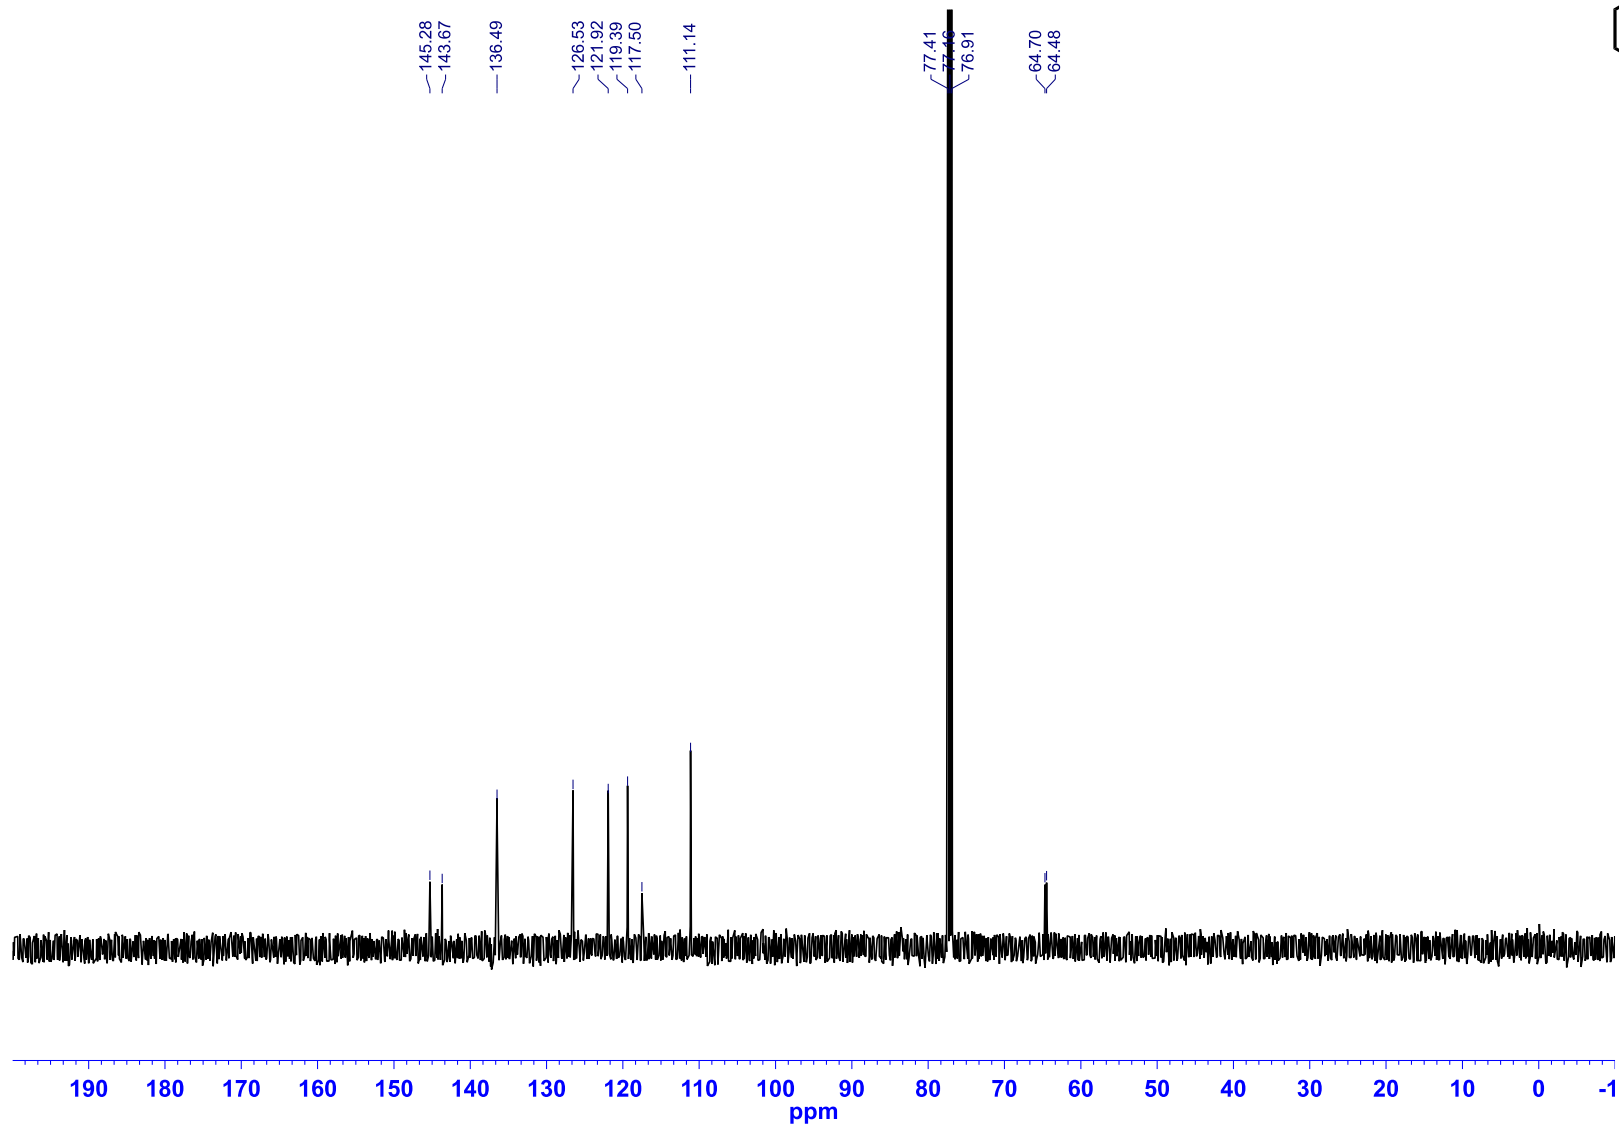

$^{11}\text{B}$  NMR (128.4 MHz, MeCN) of 2-(2,3-dihydrobenzo[1,4]dioxin-5-yl)-1-methyl-2,3-dihydro-1*H*-1,3,2-benzodiazaborole (**5n**)

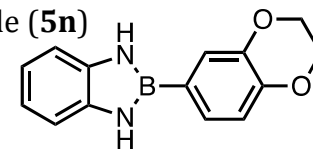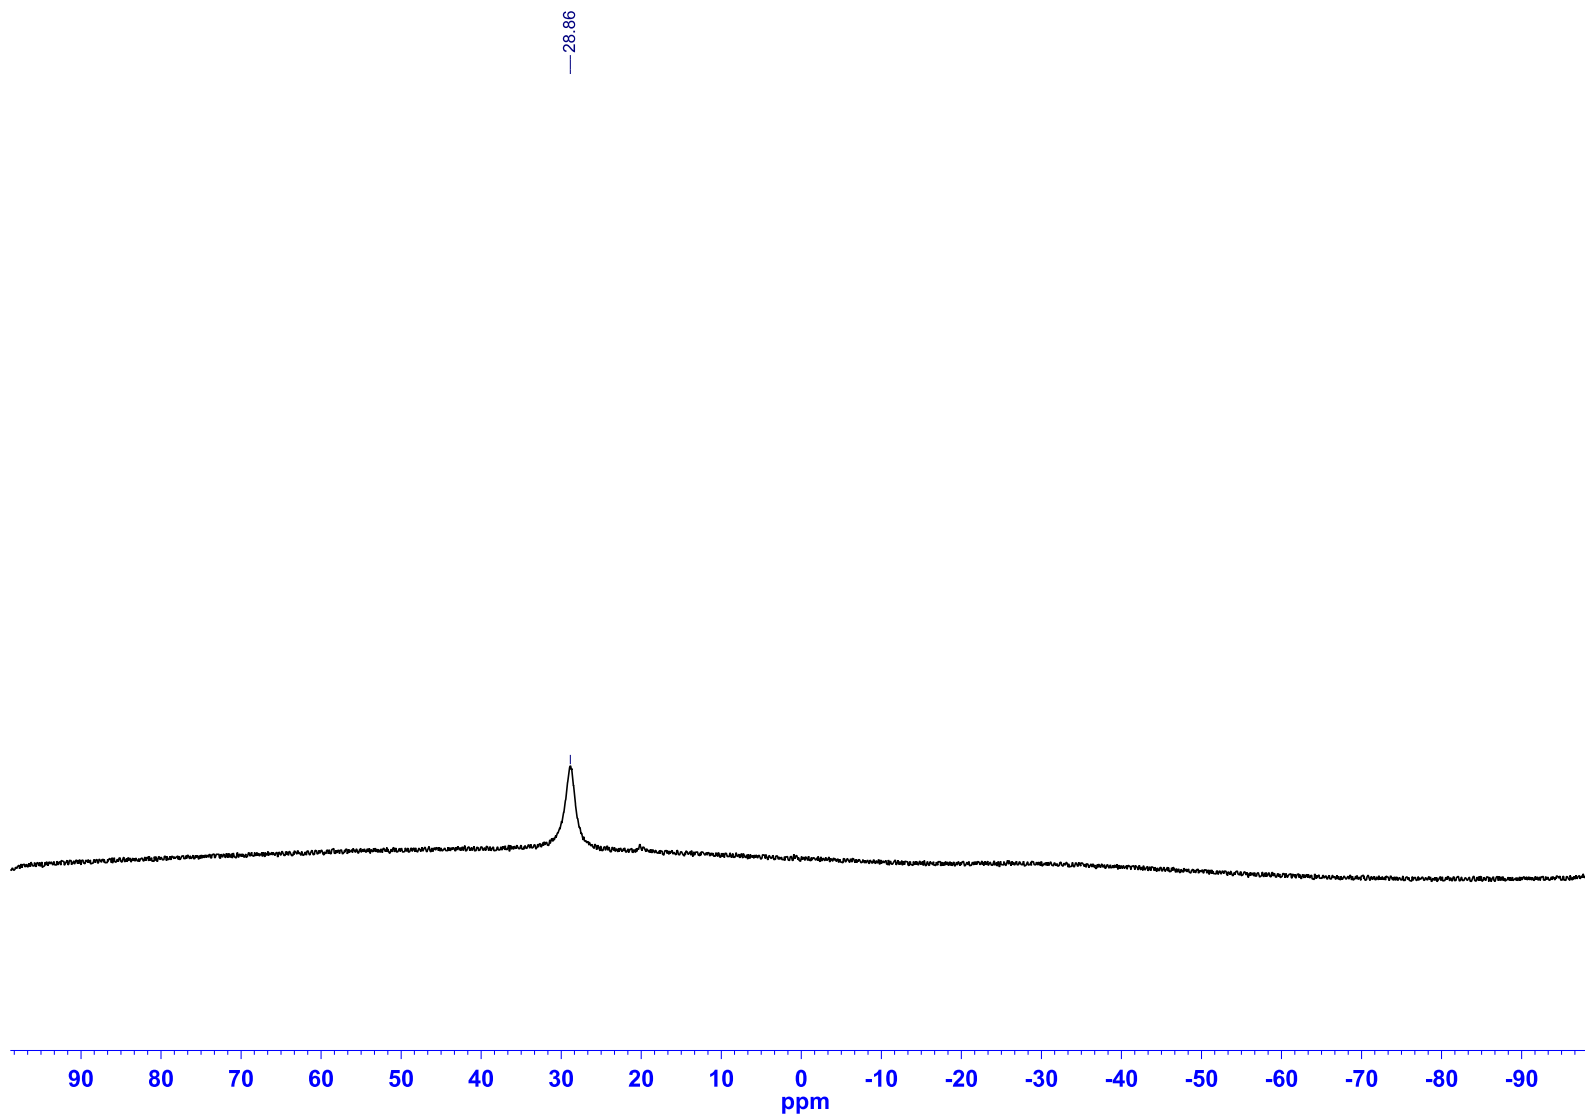

$^1\text{H}$  NMR (500.4 MHz,  $\text{DMSO-}d_6$ ) of 2-(3-nitrophenyl)-2,3-dihydro-1*H*-1,3,2-benzodiazaborole (**5o**)

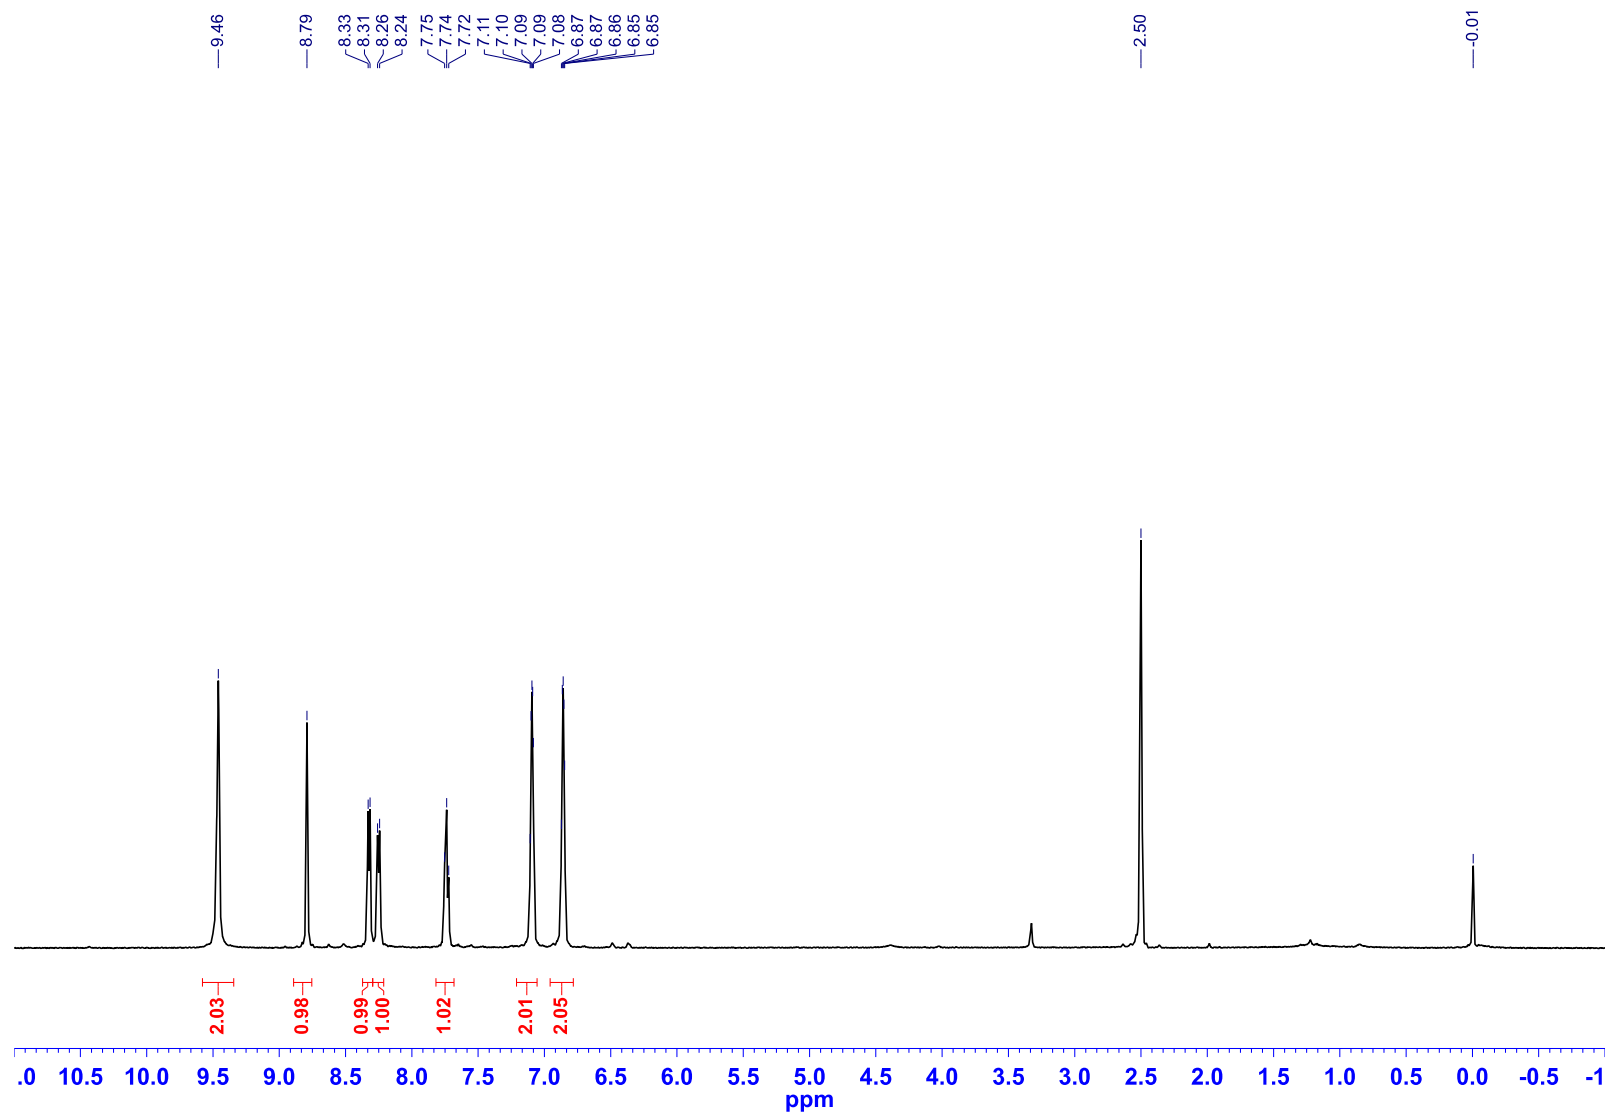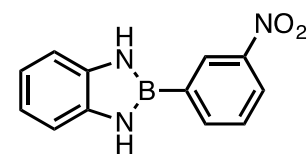

$^{13}\text{C}$  NMR (125.8 MHz,  $\text{DMSO-}d_6$ ) of 2-(3-nitrophenyl)-2,3-dihydro-1*H*-1,3,2-benzodiazaborole (**5o**)

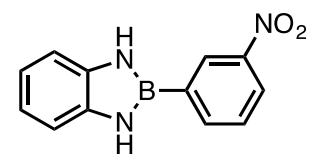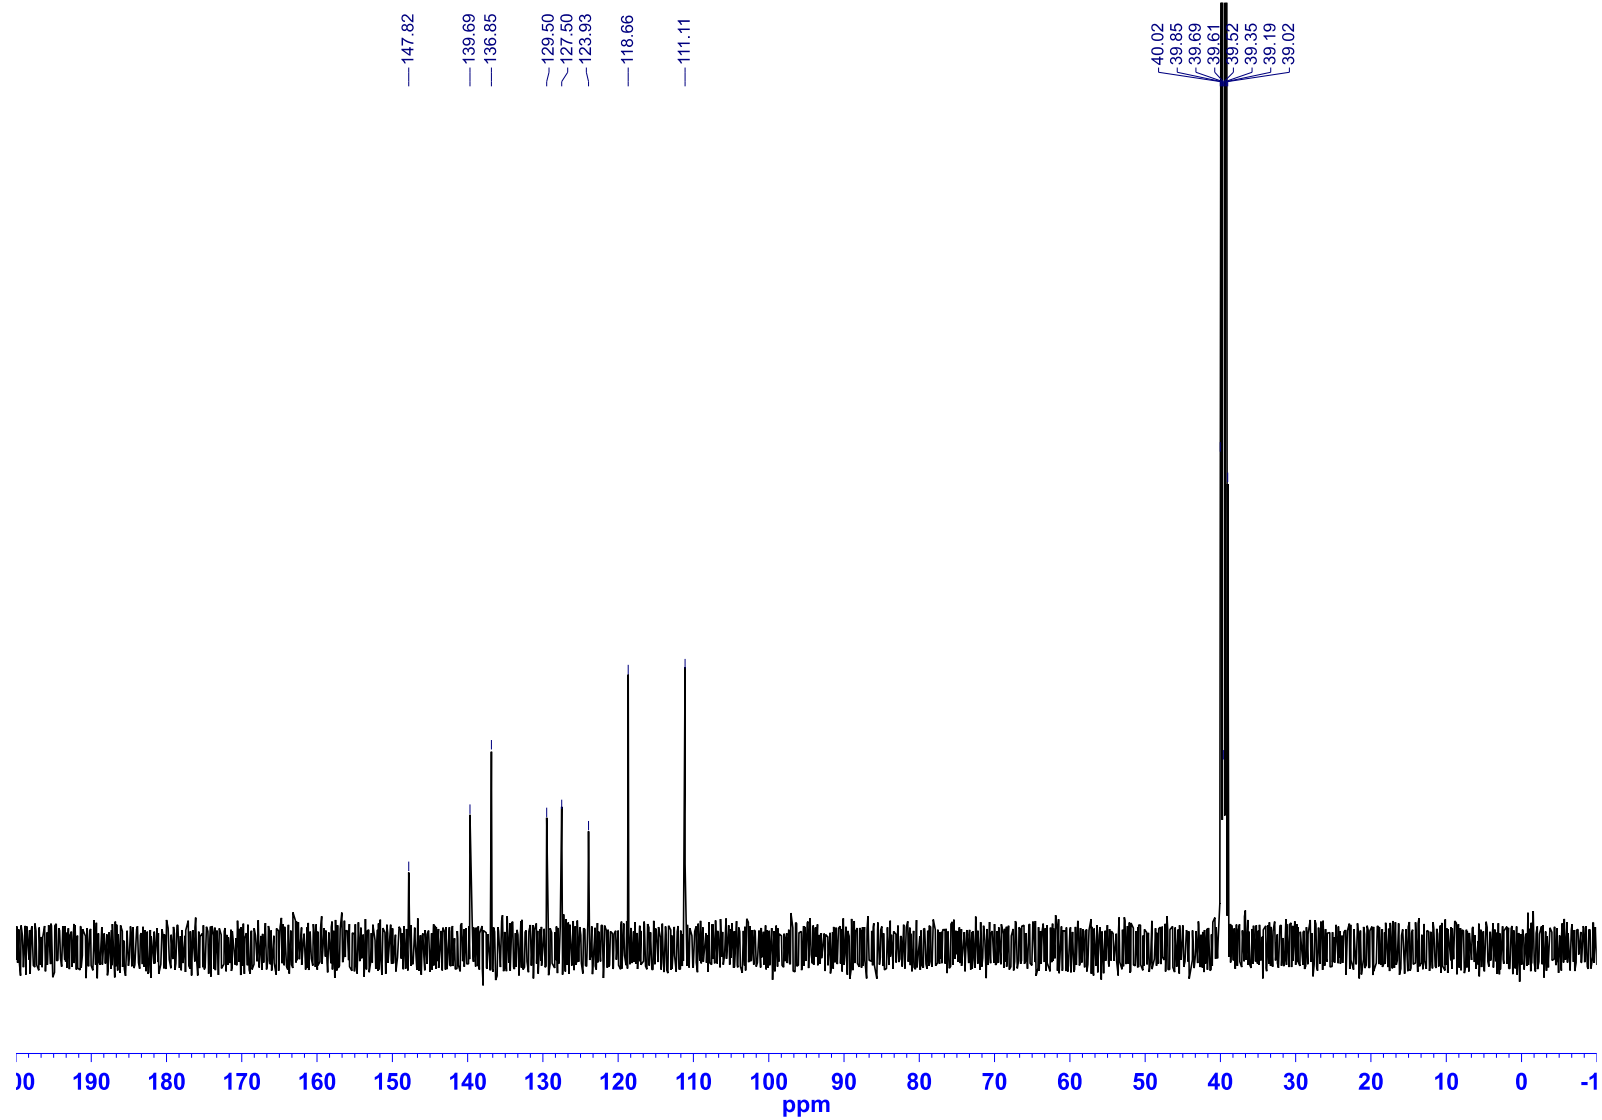



$^{11}\text{B}$  NMR (128.4 MHz, MeCN) of 2-(3-nitrophenyl)-2,3-dihydro-1*H*-1,3,2-benzodiazaborole (**5o**)



—28.34

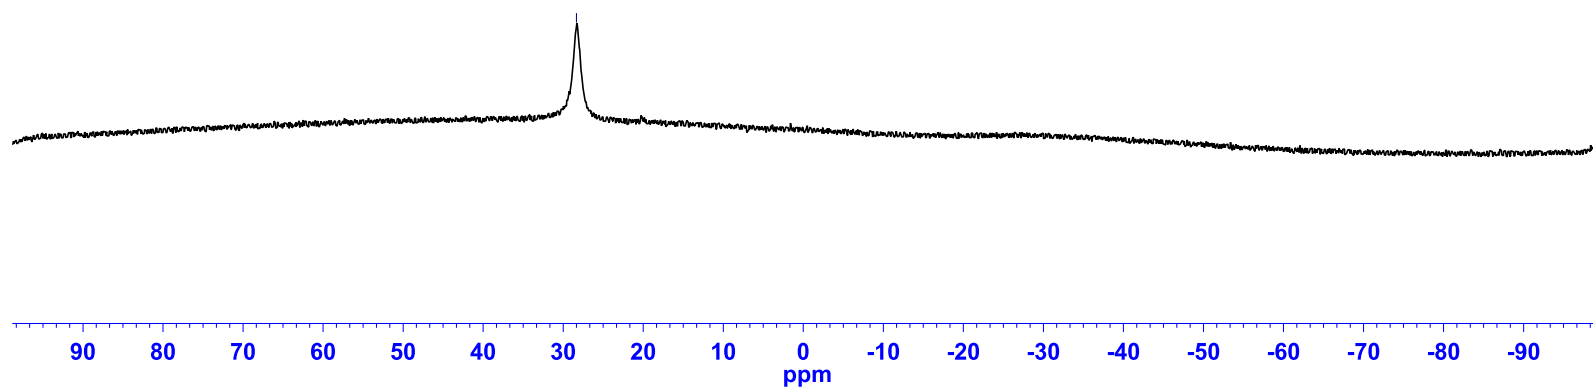

$^1\text{H}$  NMR (500.4 MHz,  $\text{CDCl}_3$ ) of 2-(3-cyanophenyl)-2,3-dihydro-1*H*-1,3,2-benzodiazaborole (**5p**)

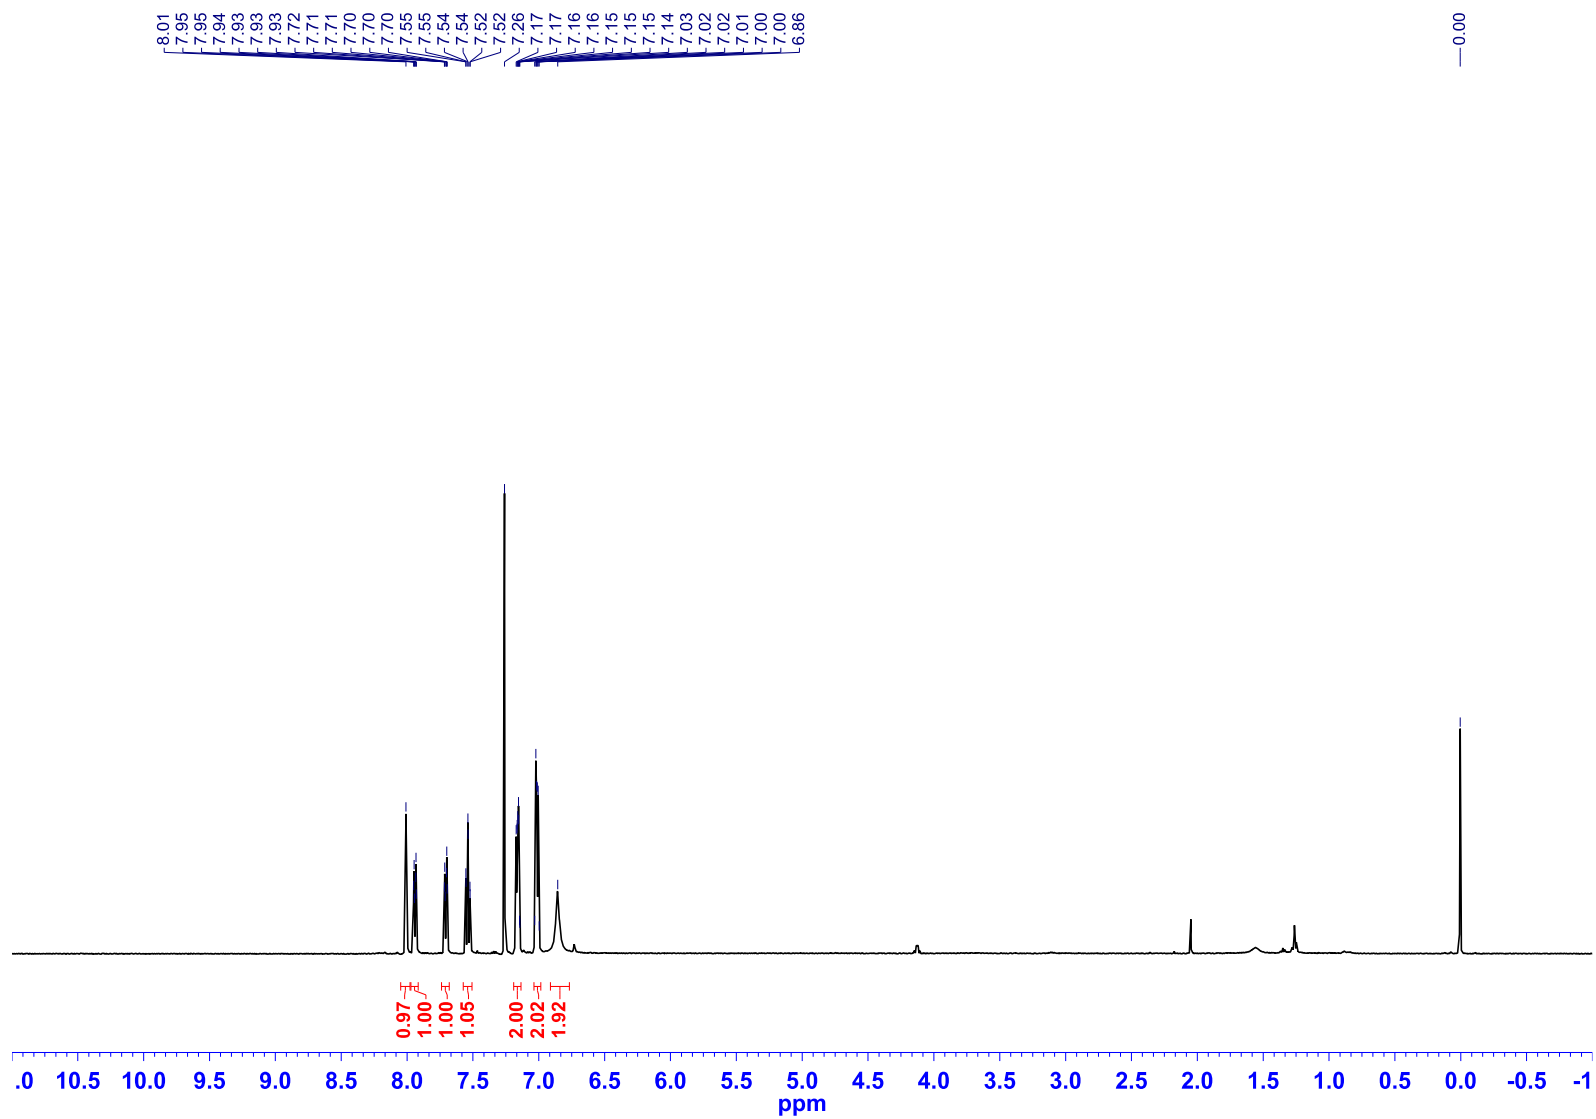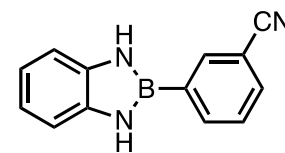

$^{13}\text{C}$  NMR (125.8 MHz,  $\text{CDCl}_3$ ) of 2-(3-cyanophenyl)-2,3-dihydro-1*H*-1,3,2-benzodiazaborole (**5p**)

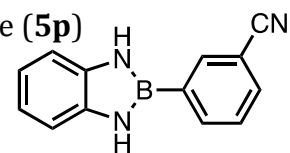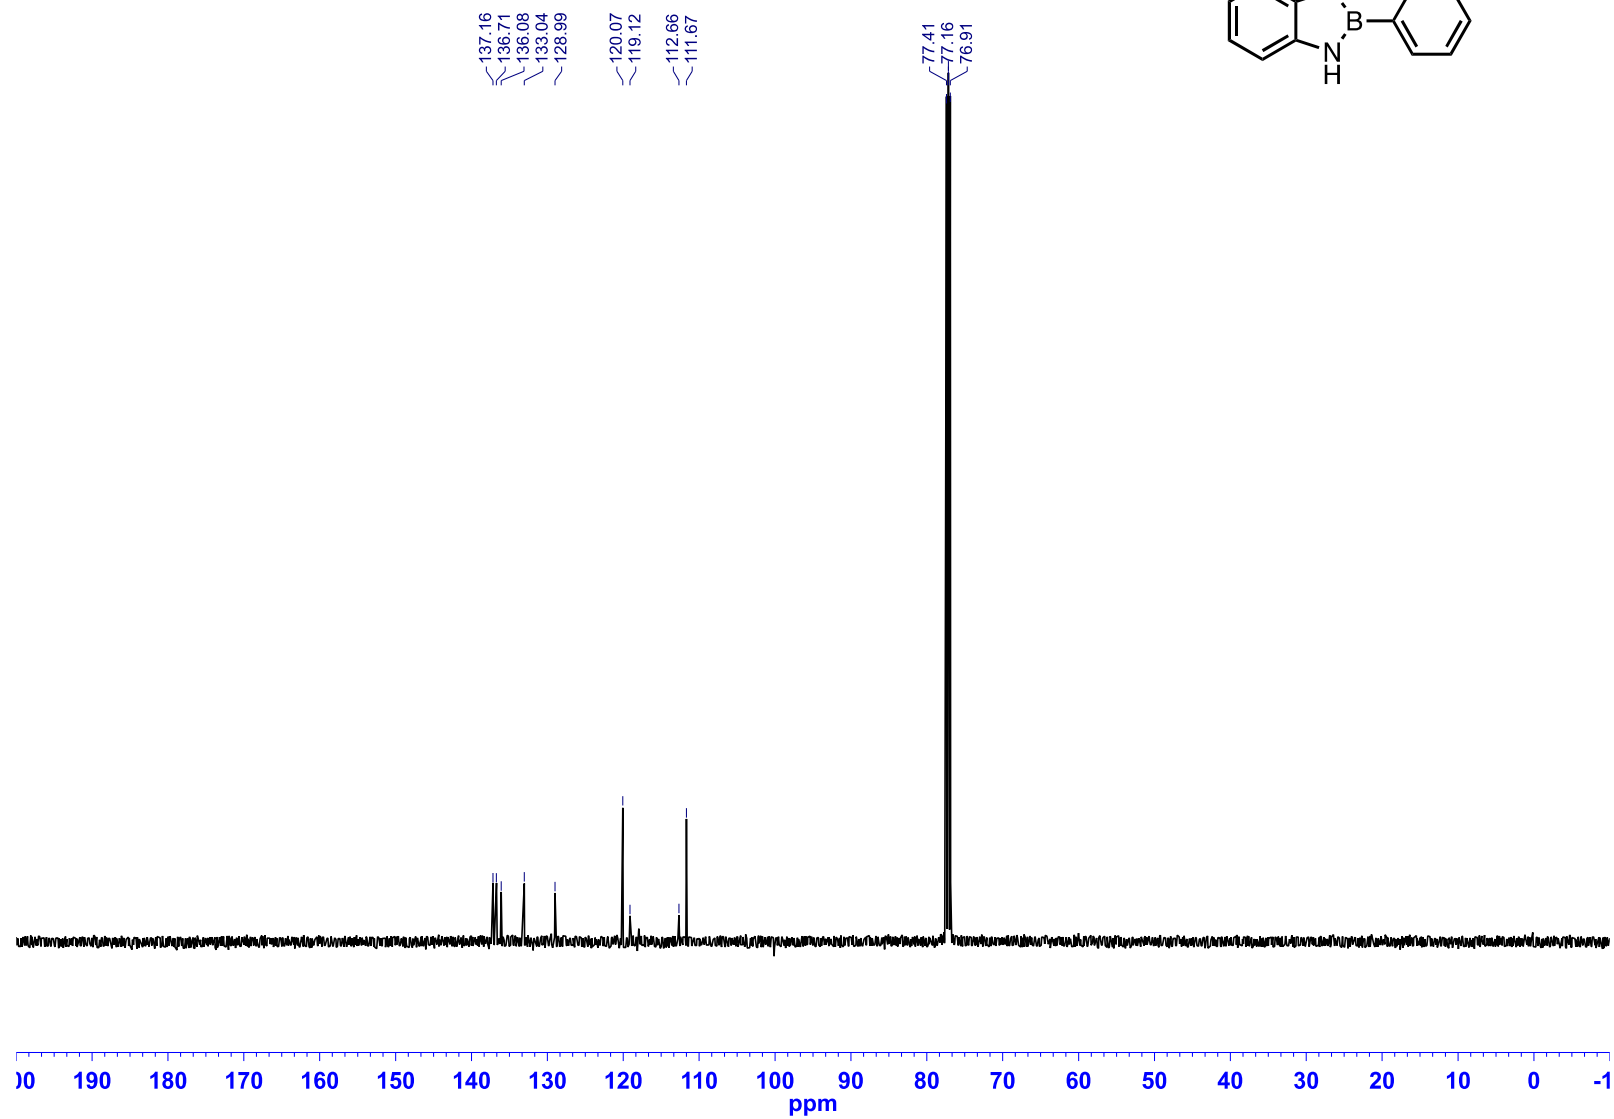

$^{11}\text{B}$  NMR (128.4 MHz,  $\text{CDCl}_3$ ) of 2-(3-cyanophenyl)-2,3-dihydro-1*H*-1,3,2-benzodiazaborole (**5p**)

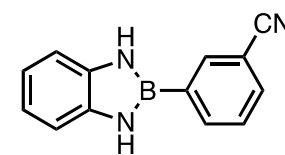

—27.69

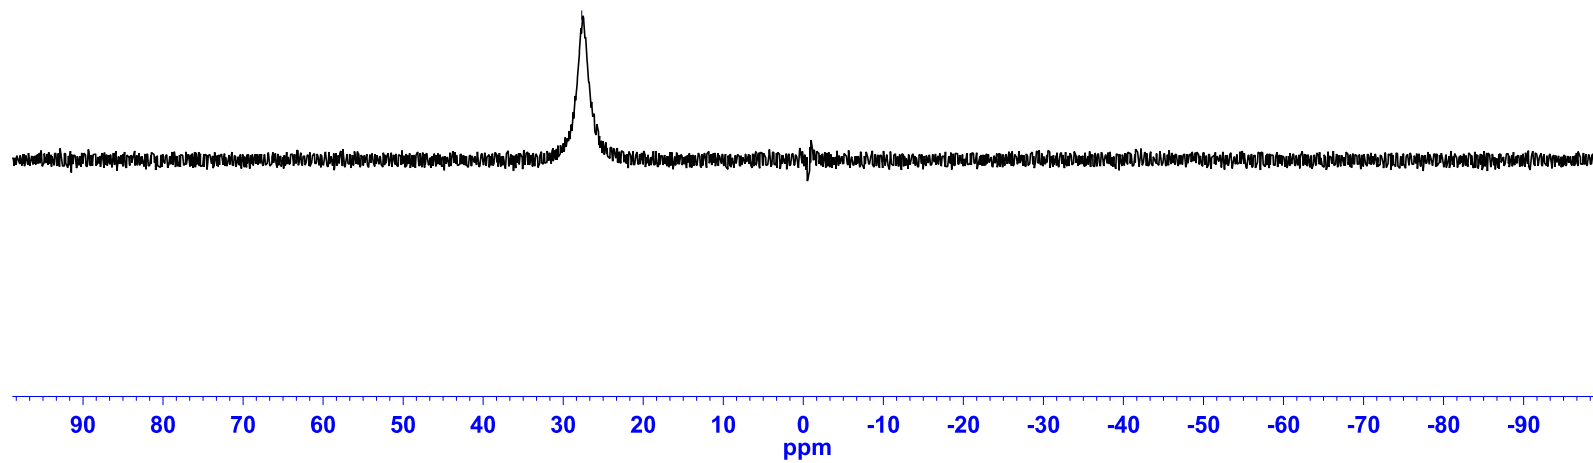

$^1\text{H}$  NMR (500.4 MHz,  $\text{CDCl}_3$ ) of 2-(3-thienyl)-2,3-dihydro-1*H*-1,3,2-benzodiazaborole (**5q**)

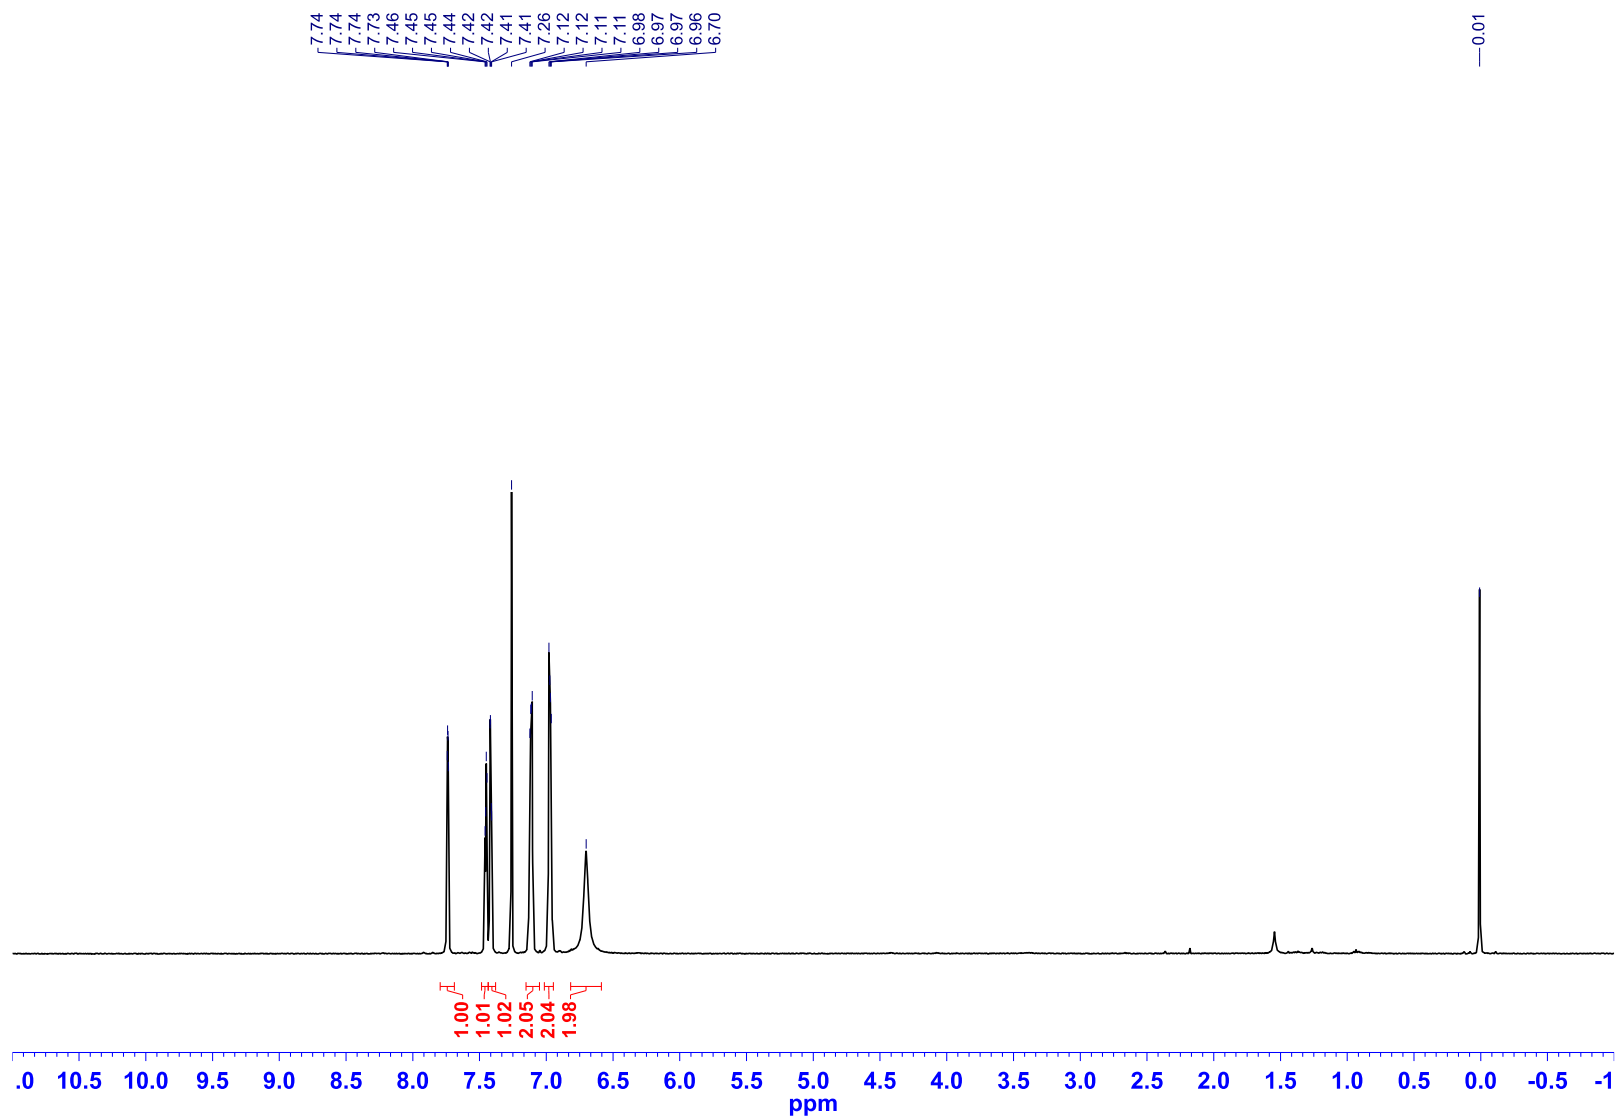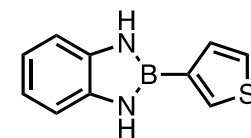

$^{13}\text{C}$  NMR (125.8 MHz,  $\text{CDCl}_3$ ) of 2-(3-thienyl)-2,3-dihydro-1*H*-1,3,2-benzodiazaborole (**5q**)

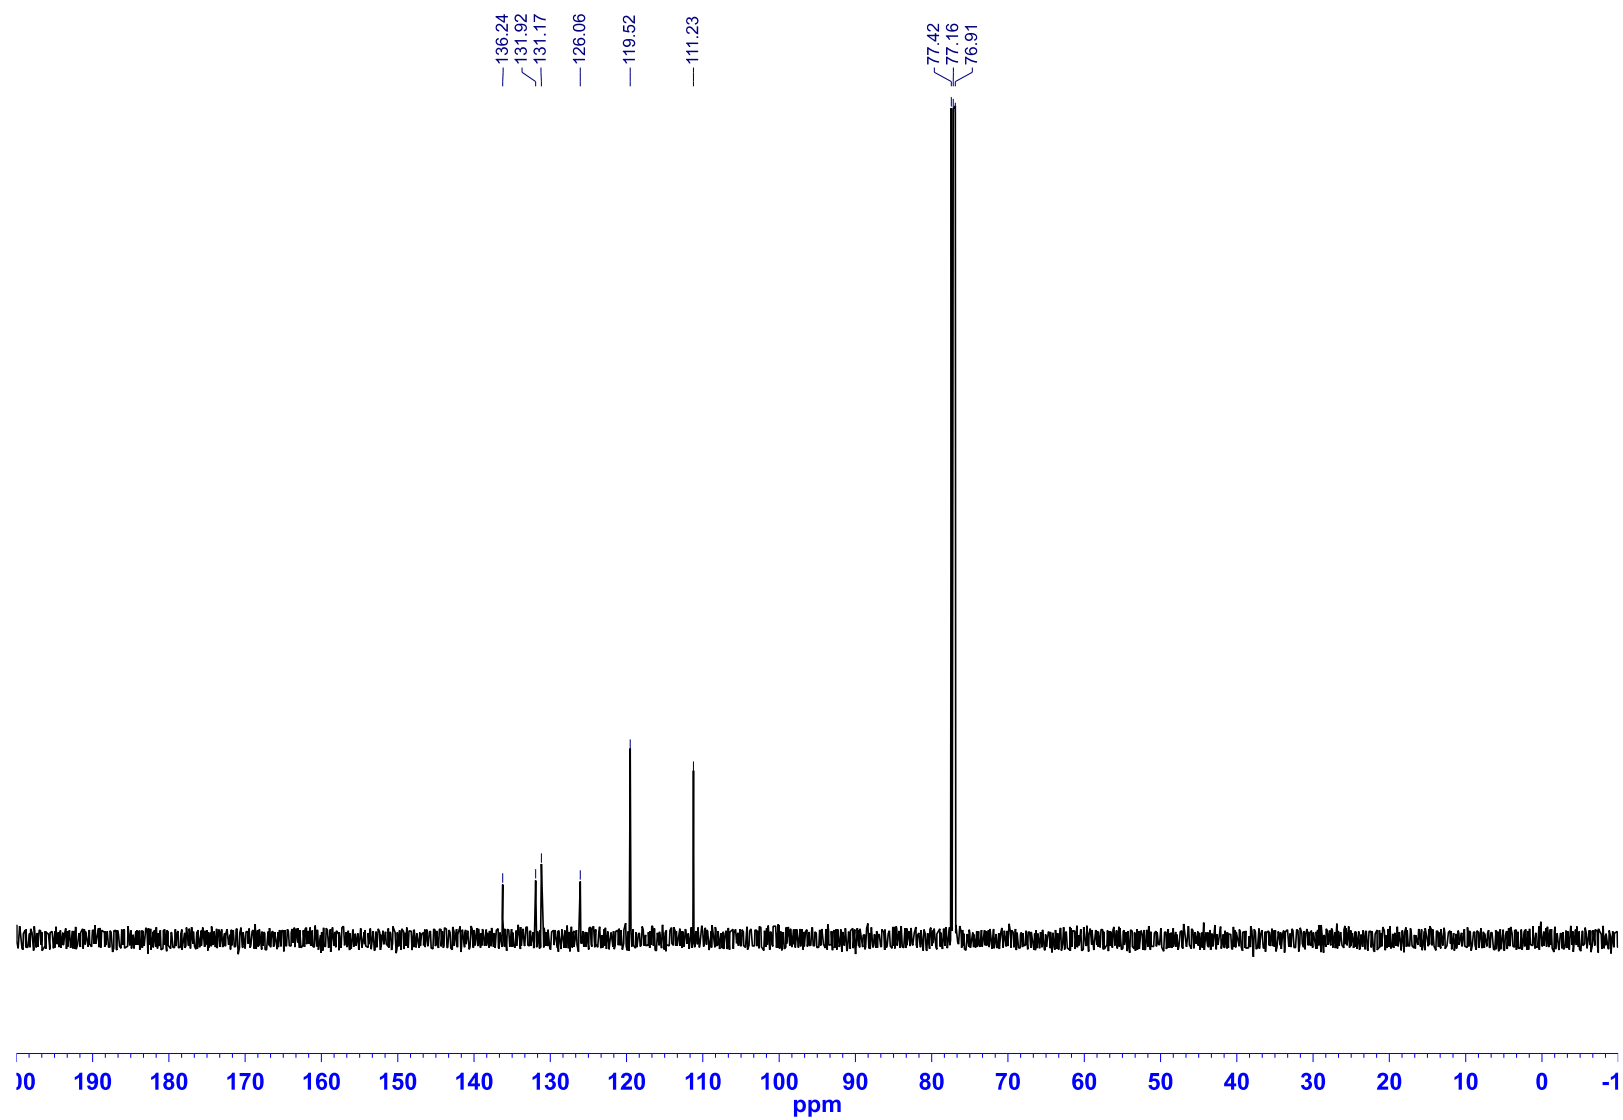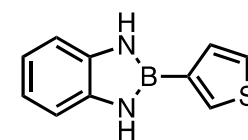

$^{11}\text{B}$  NMR (128.4 MHz, MeCN) of 2-(3-thienyl)-2,3-dihydro-1*H*-1,3,2-benzodiazaborole (**5q**)



— 26.82

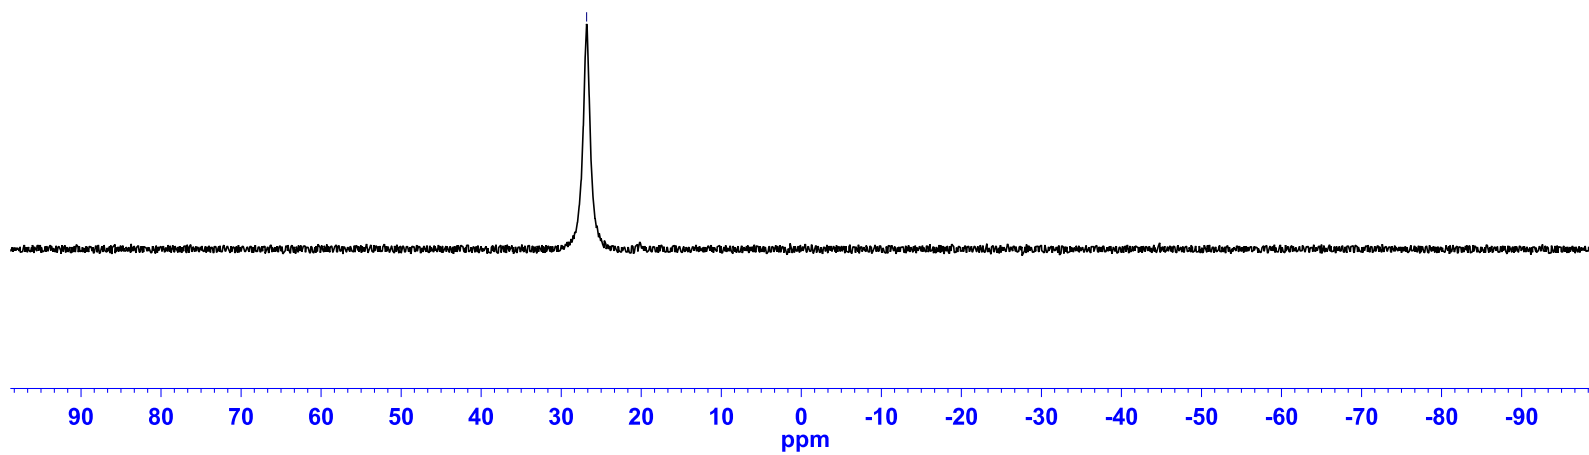

$^1\text{H}$  NMR (500.4 MHz,  $\text{CDCl}_3$ ) of 2-(2-benzofuranyl)-2,3-dihydro-1*H*-1,3,2-benzodiazaborole (**5r**)

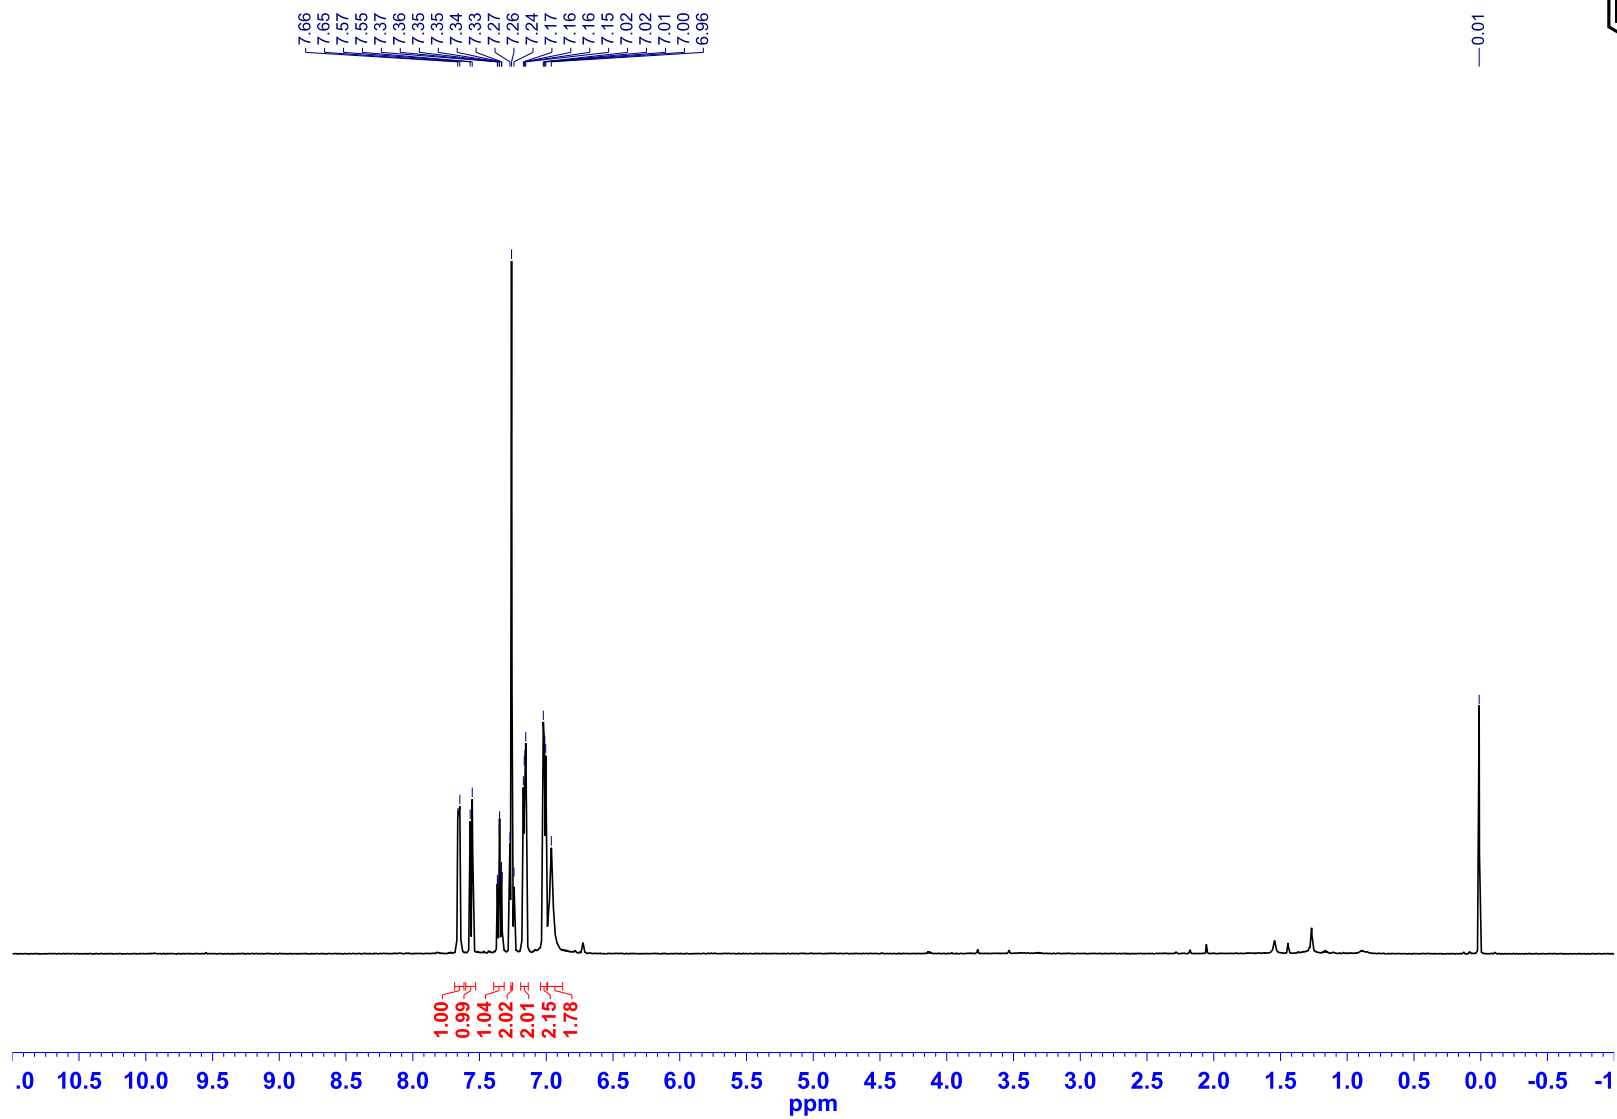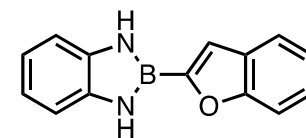



$^{13}\text{C}$  NMR (125.8 MHz,  $\text{DMSO-}d_6$ ) of 2-(2-benzofuranyl)-2,3-dihydro-1*H*-1,3,2-benzodiazaborole (**5r**)

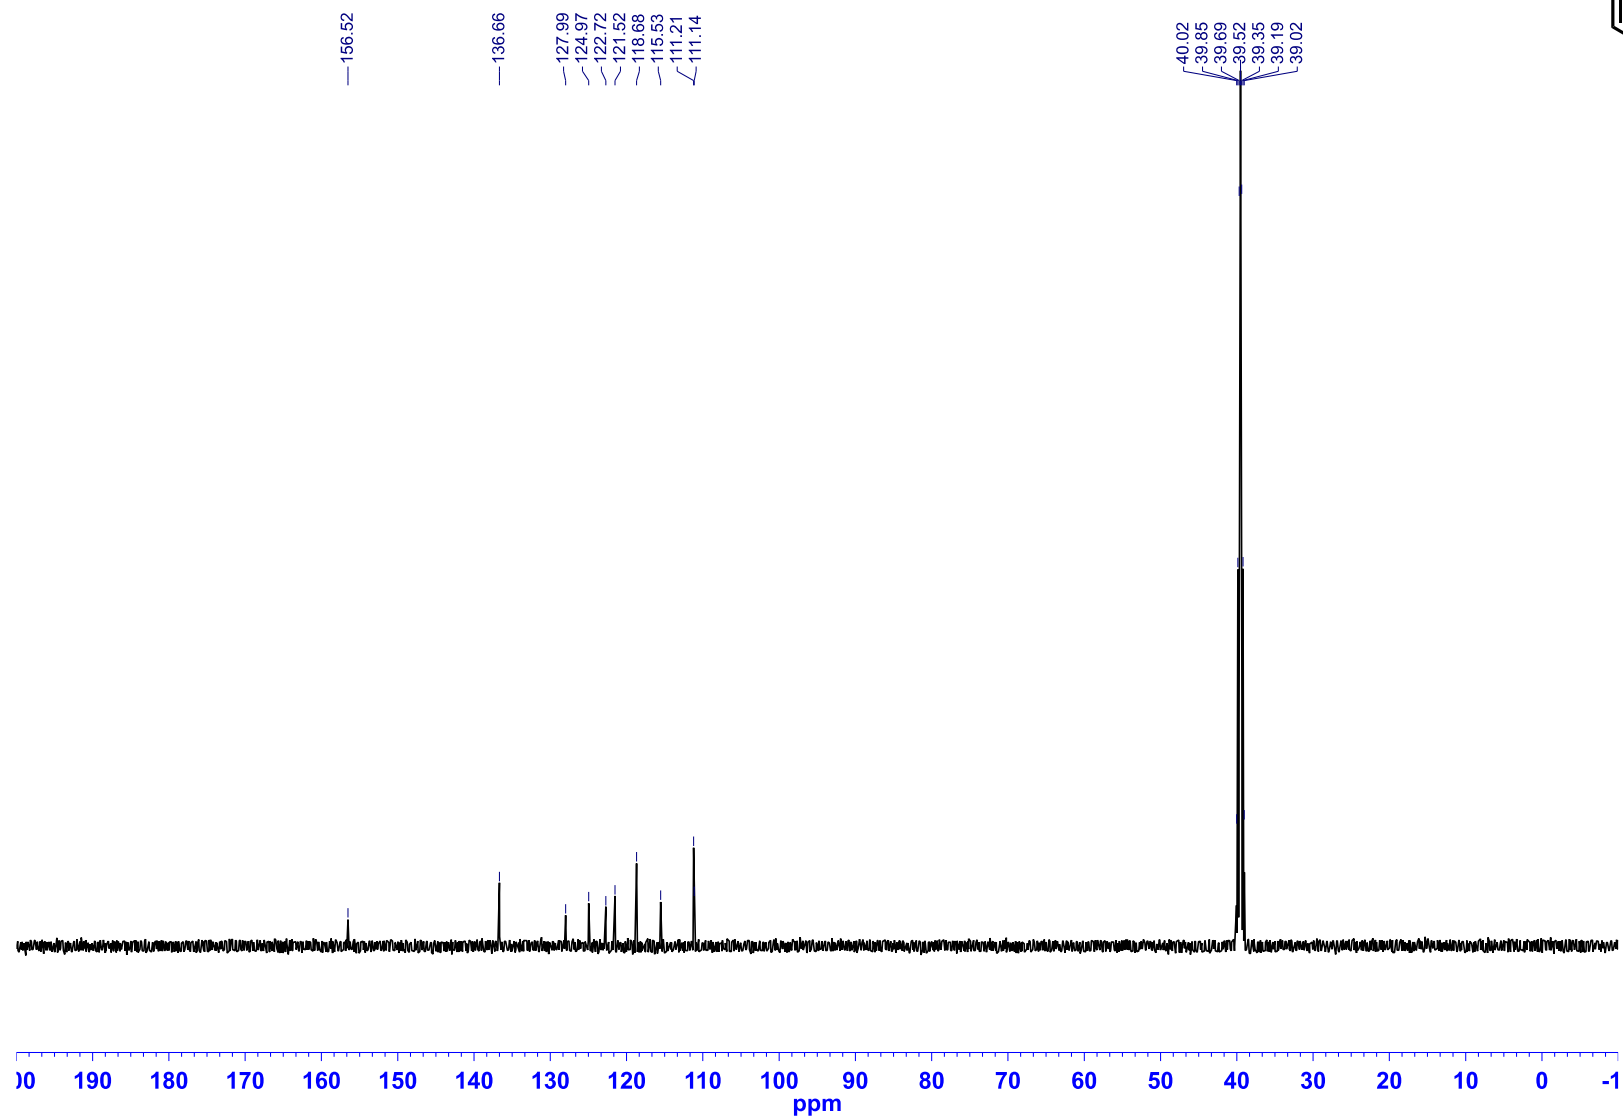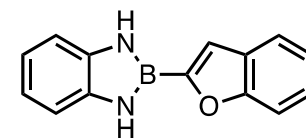

$^{11}\text{B}$  NMR (128.4 MHz, MeCN) of 2-(2-benzofuranyl)-2,3-dihydro-1*H*-1,3,2-benzodiazaborole (**5r**)



— 24.82

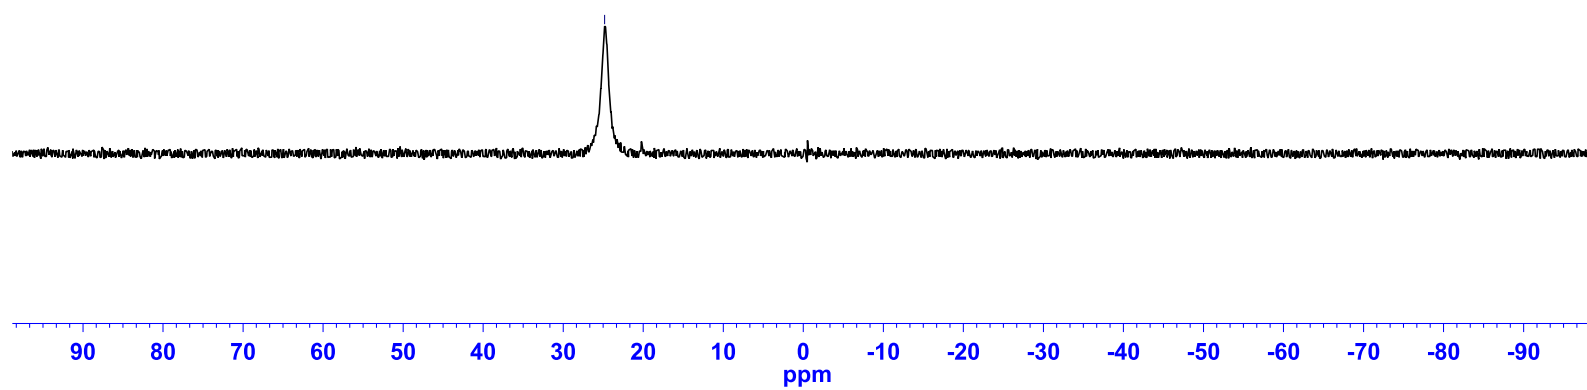

$^1\text{H}$  NMR (500.4 MHz,  $\text{CDCl}_3$ ) of 2-(2-furyl)-1-methyl-2,3-dihydro-1*H*-1,3,2-benzodiazaborole (**5s**)

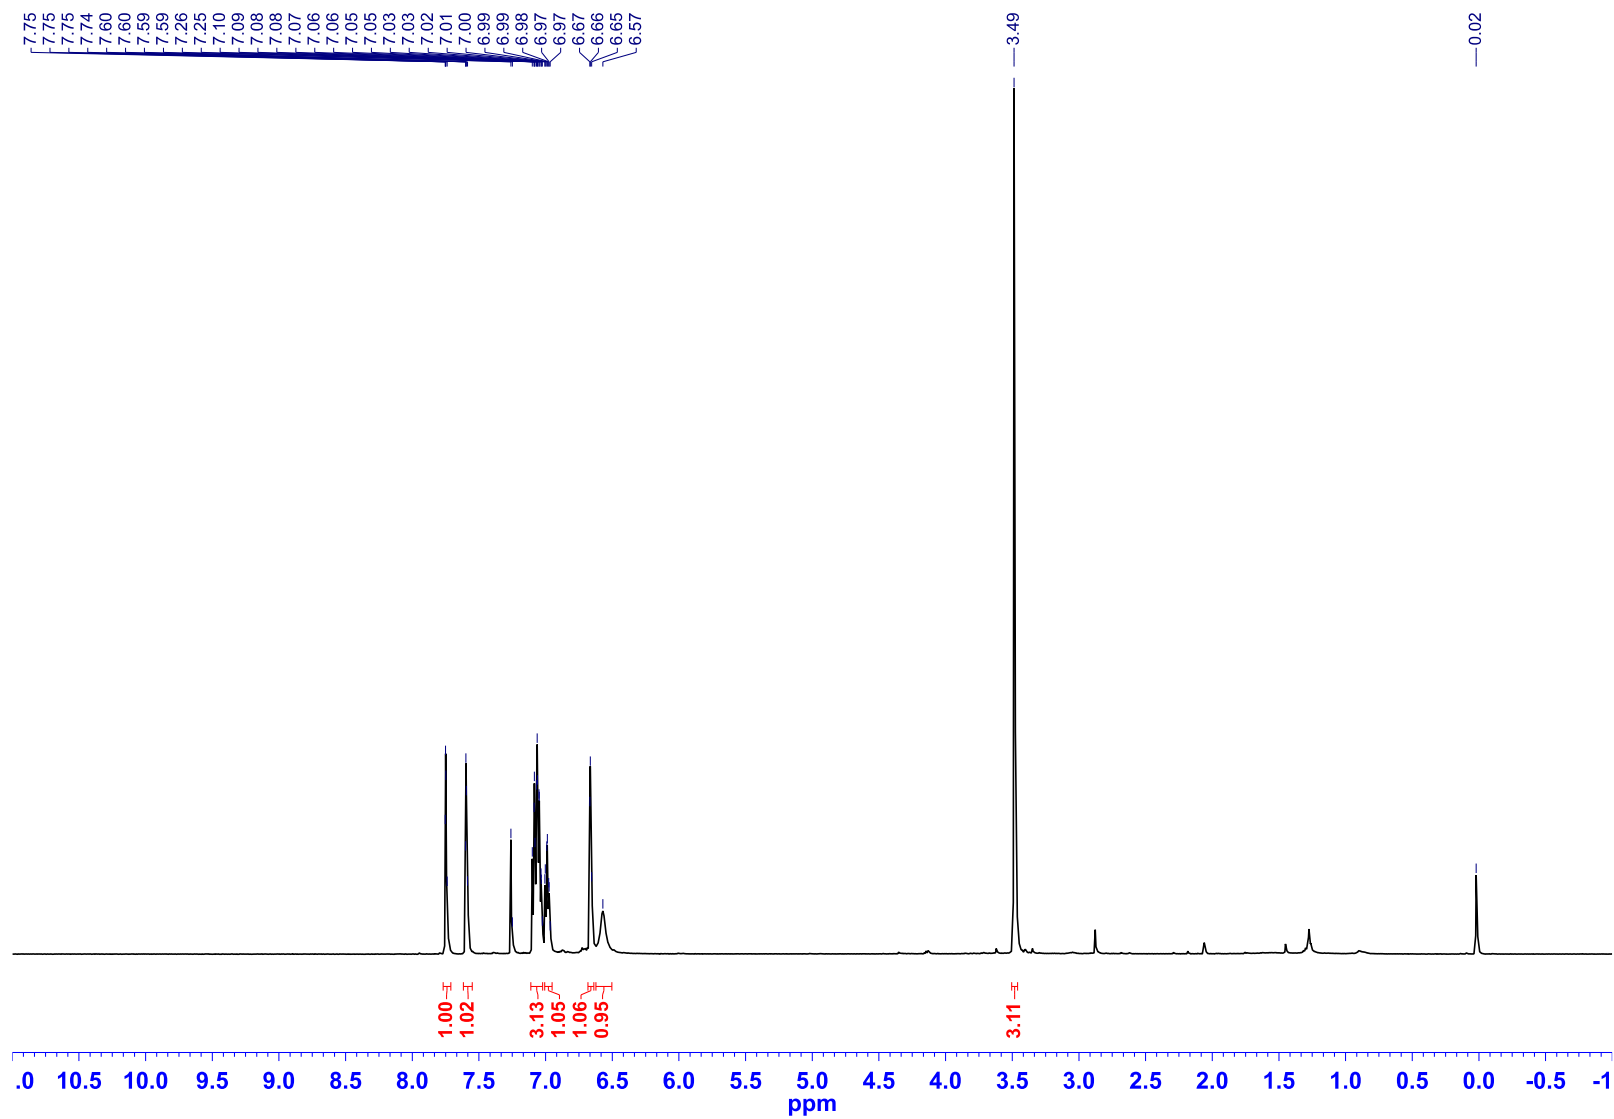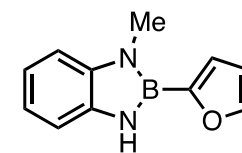

$^{13}\text{C}$  NMR (125.8 MHz,  $\text{CDCl}_3$ ) of 2-(2-furyl)-1-methyl-2,3-dihydro-1*H*-1,3,2-benzodiazaborole (**5s**)

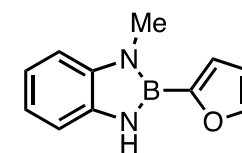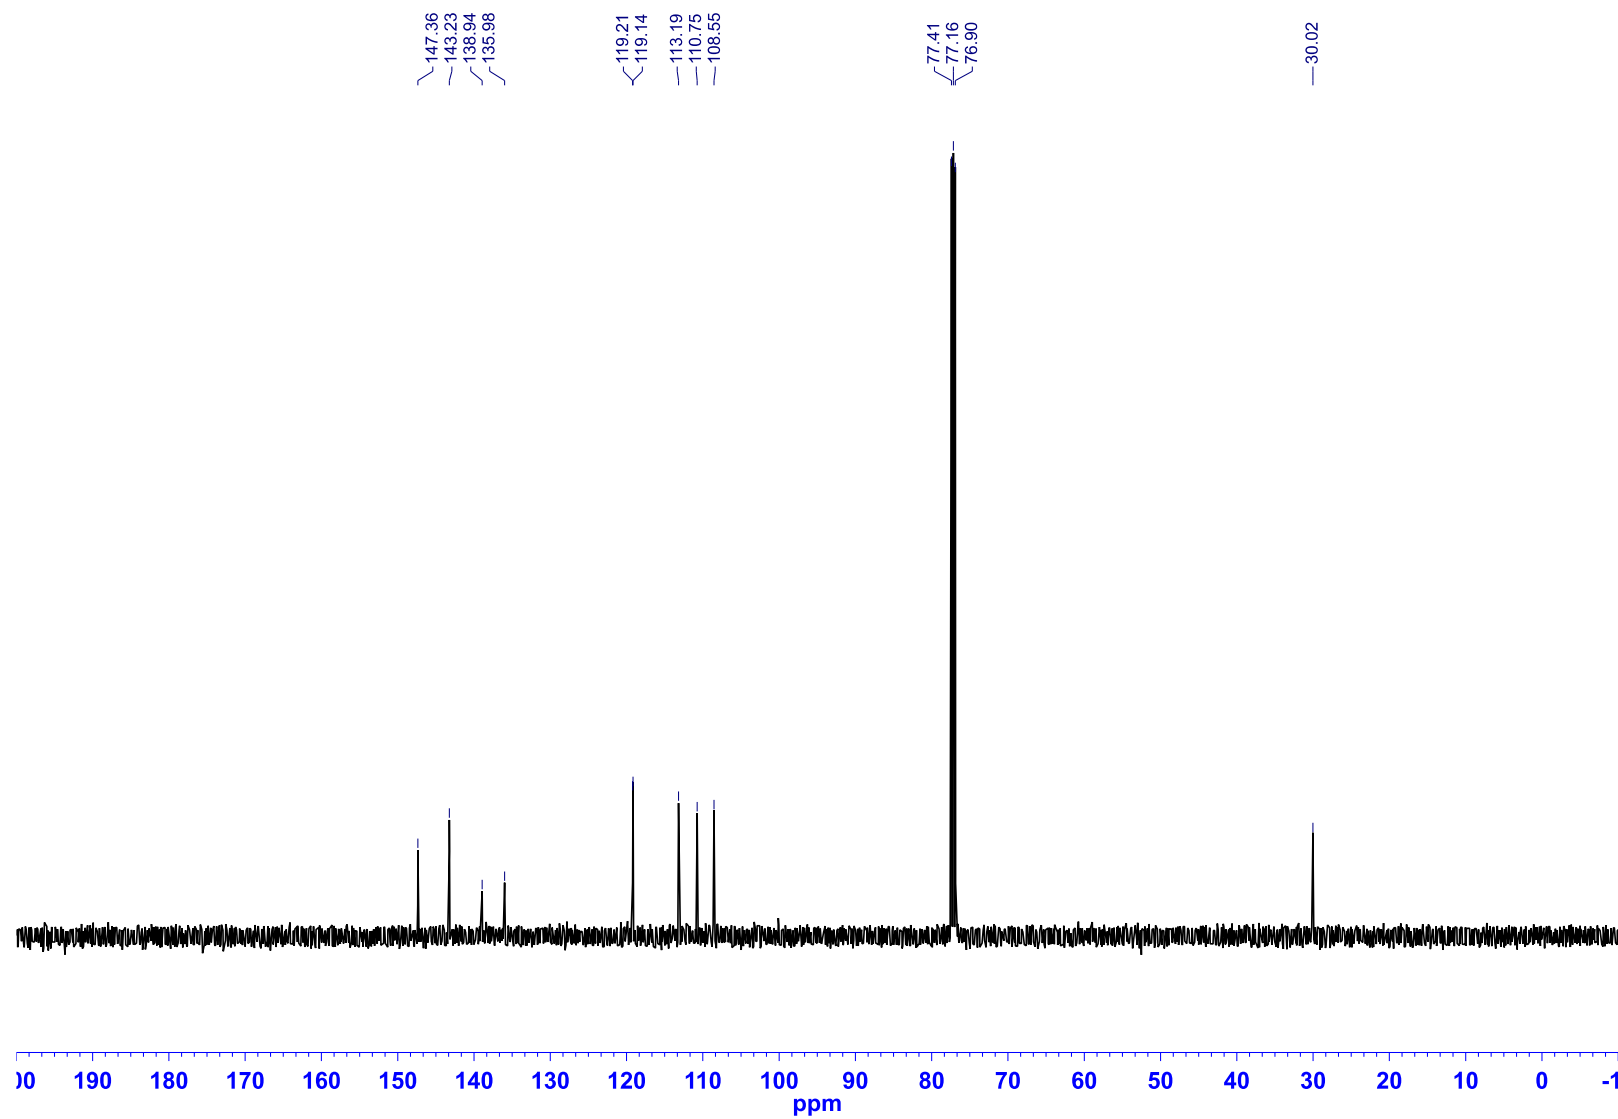

$^{11}\text{B}$  NMR (128.4 MHz, MeCN) of 2-(2-furyl)-1-methyl-2,3-dihydro-1*H*-1,3,2-benzodiazaborole (**5s**)

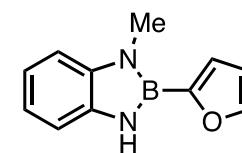

—24.50

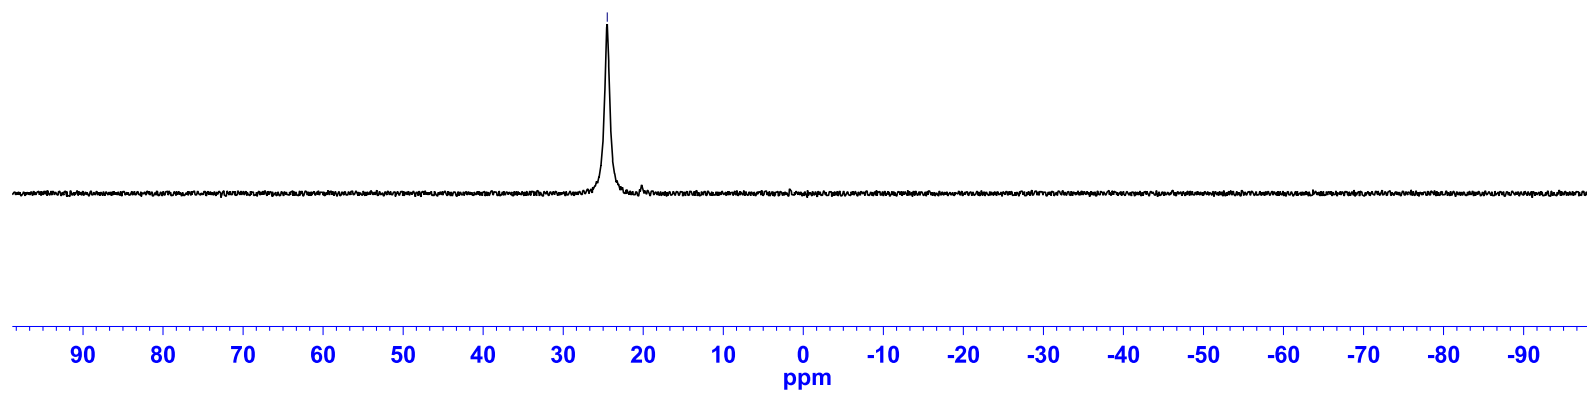

$^1\text{H}$  NMR (500.4 MHz,  $\text{CDCl}_3$  with 1% TMS) of 5-methyl-2-phenyl-2,3-dihydro-1*H*-1,3,2-benzodiazaborole (**5u**)

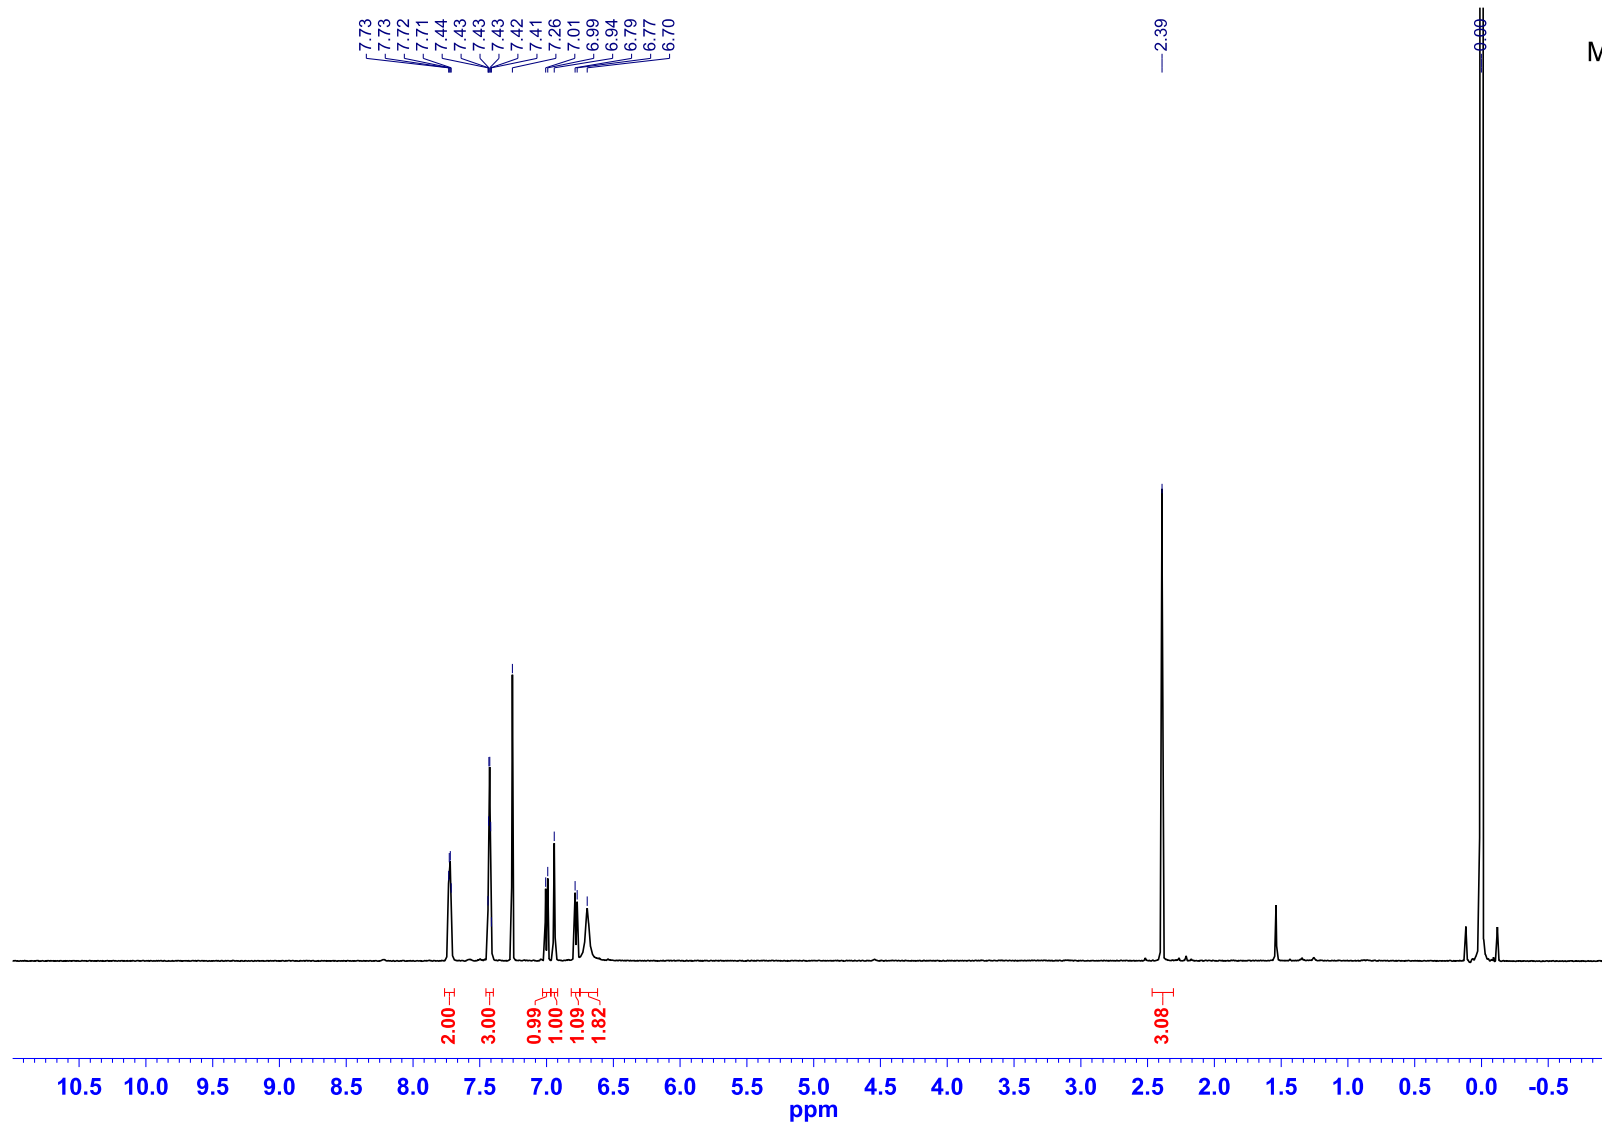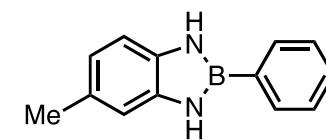

$^{13}\text{C}$  NMR (125.8 MHz,  $\text{CDCl}_3$ ) of 5-methyl-2-phenyl-2,3-dihydro-1*H*-1,3,2-benzodiazaborole (**5u**)

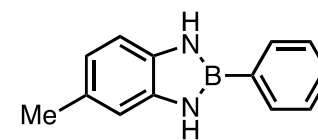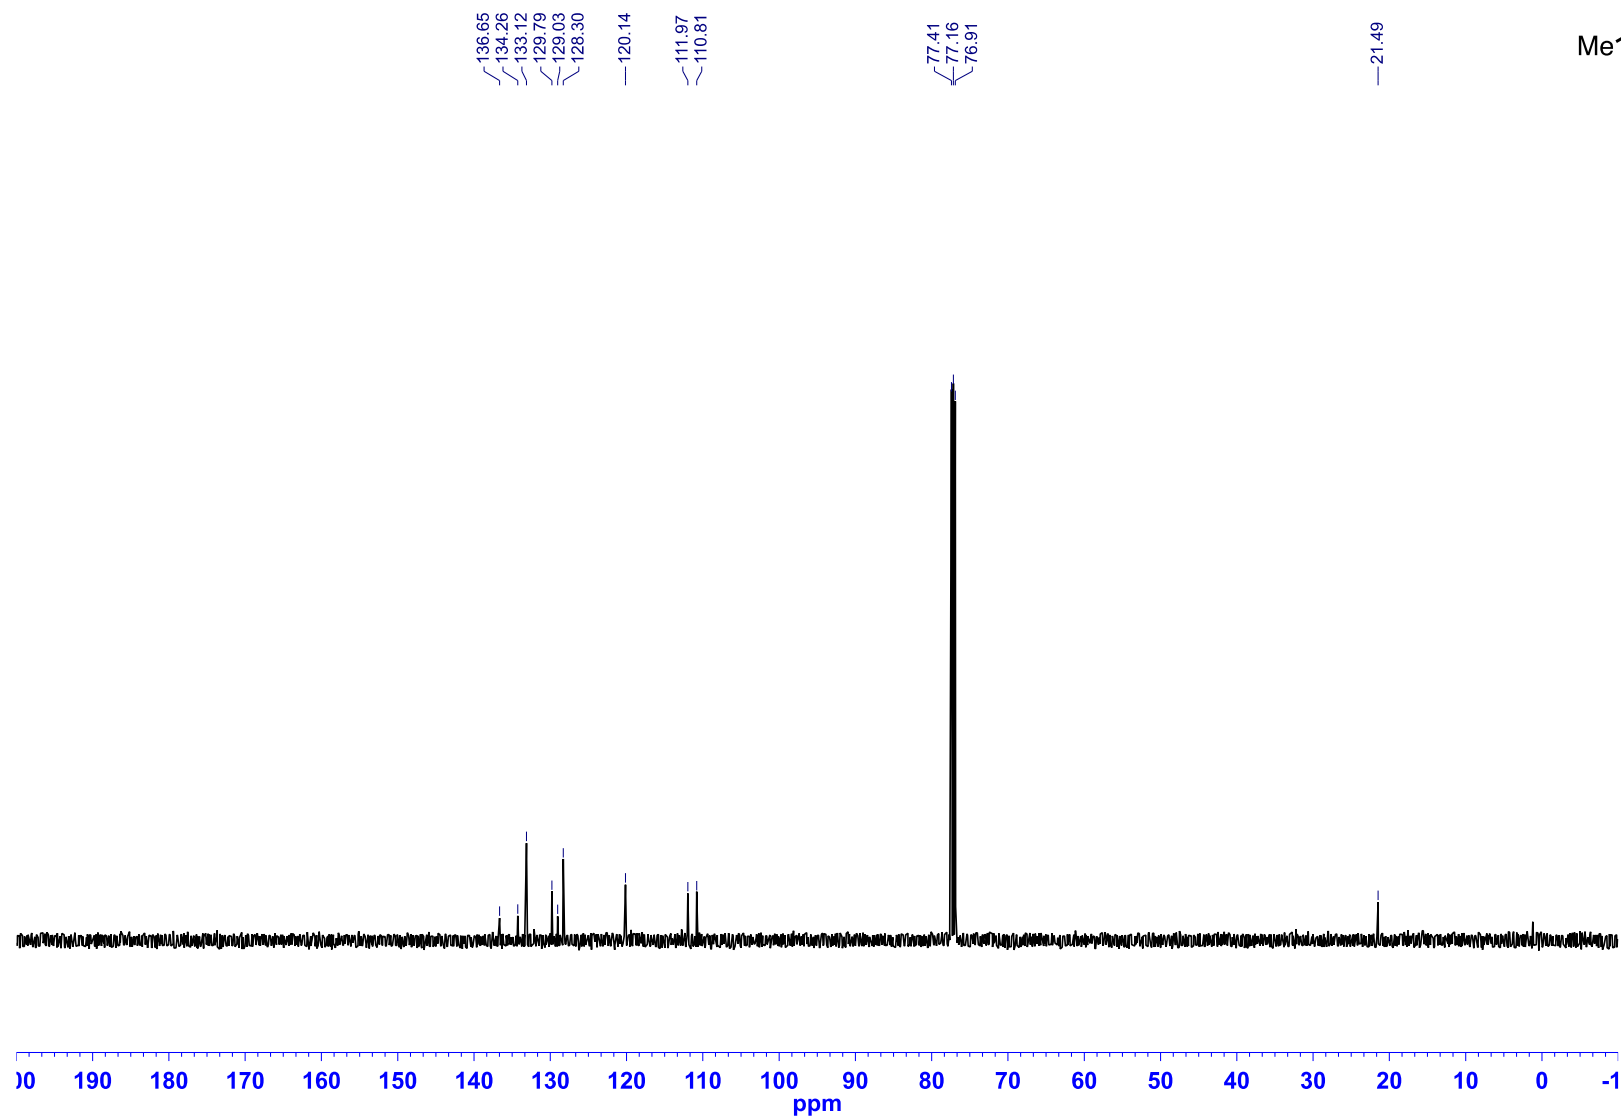

$^{11}\text{B}$  NMR (128.4 MHz, MeCN) of 5-methyl-2-phenyl-2,3-dihydro-1*H*-1,3,2-benzodiazaborole (**5u**)



—29.15

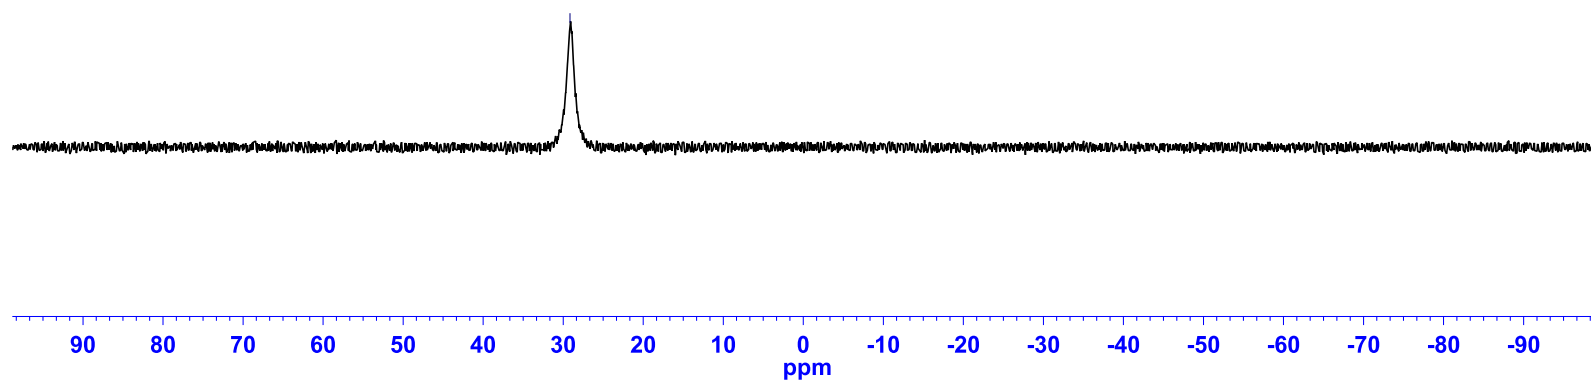



$^1\text{H}$  NMR (500.4 MHz,  $\text{CDCl}_3$ ) of 5-fluoro-2-phenyl-2,3-dihydro-1*H*-1,3,2-benzodiazaborole (**5v**)

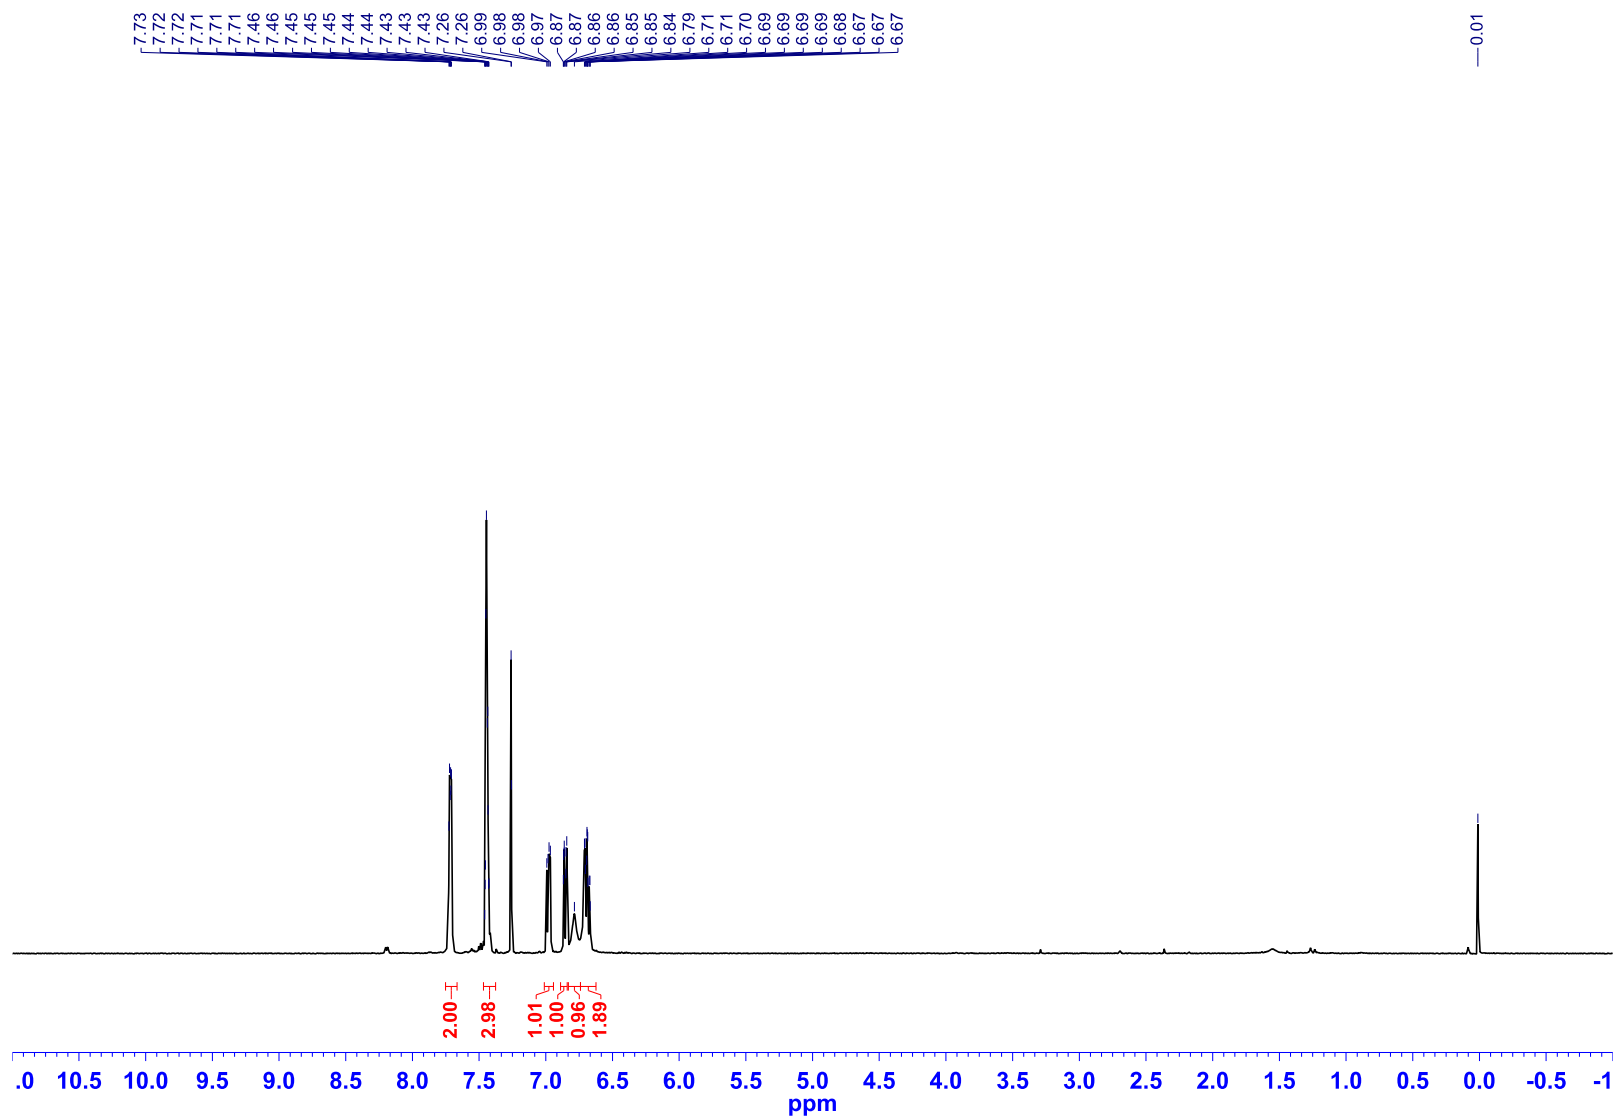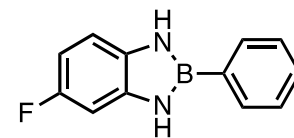

$^{13}\text{C}$  NMR (125.8 MHz,  $\text{CDCl}_3$ ) of 5-fluoro-2-phenyl-2,3-dihydro-1*H*-1,3,2-benzodiazaborole (**5v**)

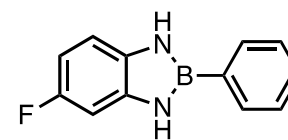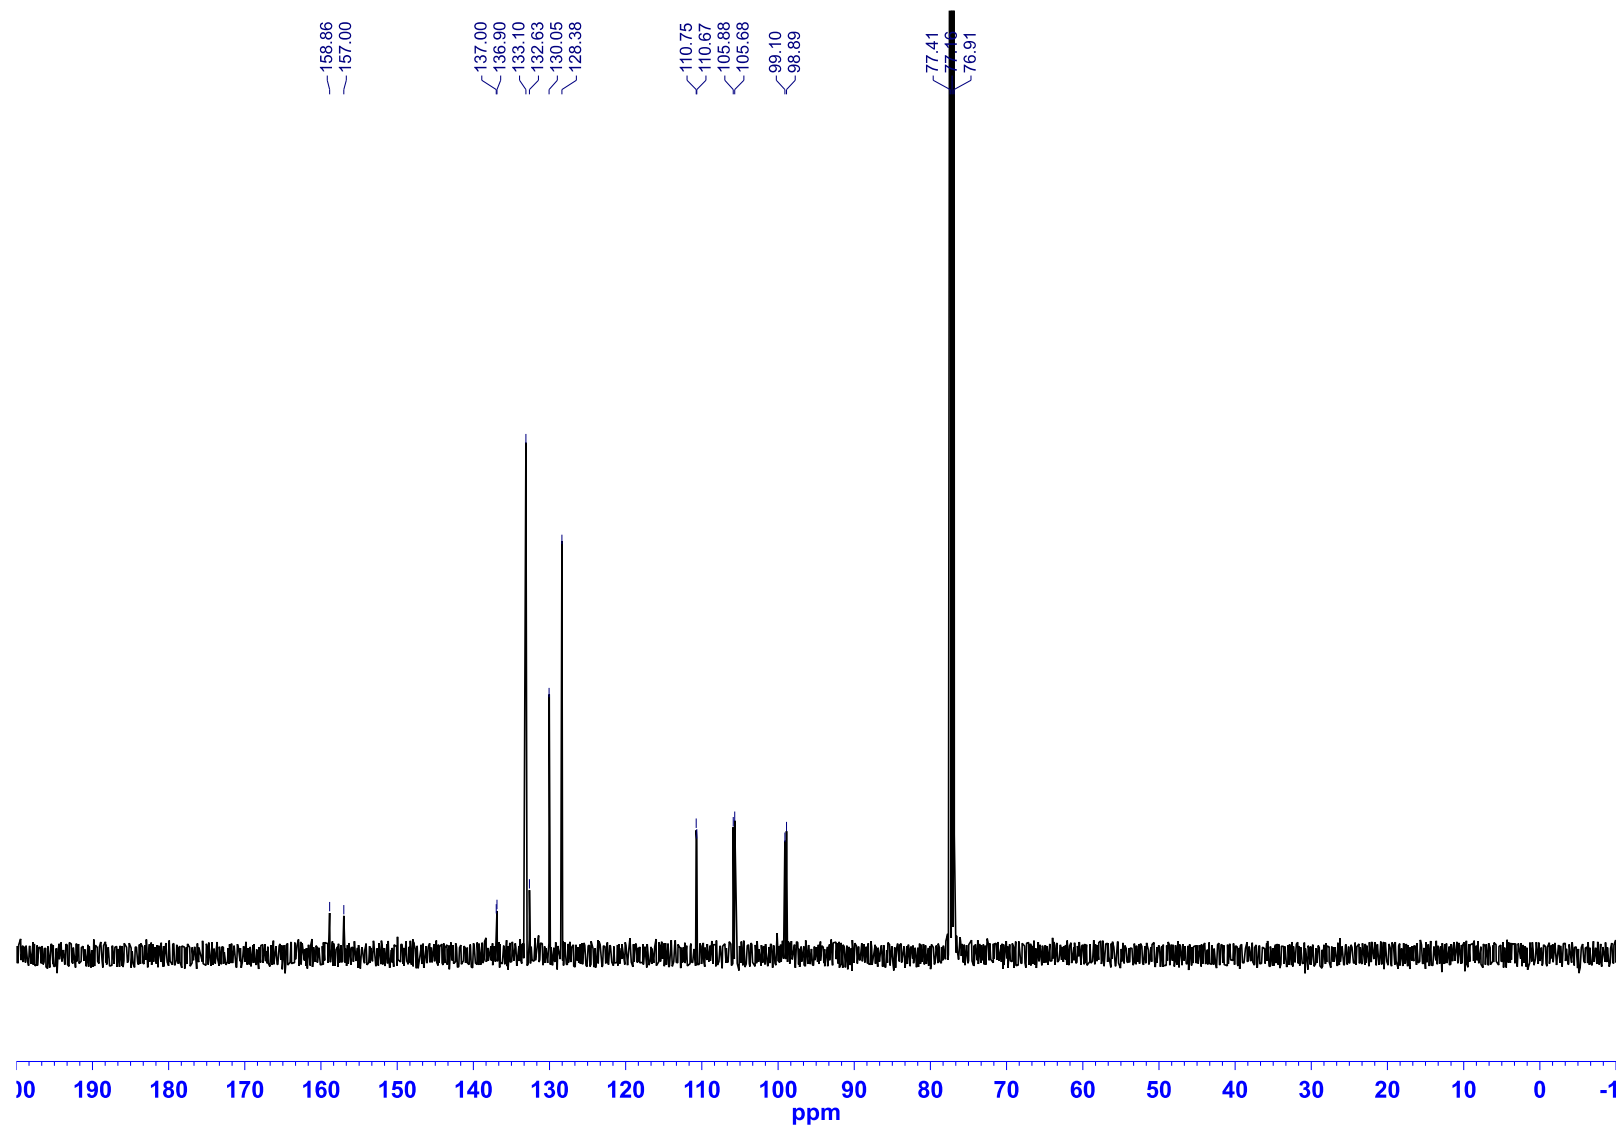

$^{11}\text{B}$  NMR (128.4 MHz, MeCN) of 5-fluoro-2-phenyl-2,3-dihydro-1*H*-1,3,2-benzodiazaborole (**5v**)

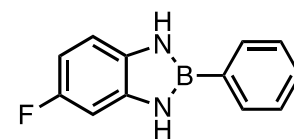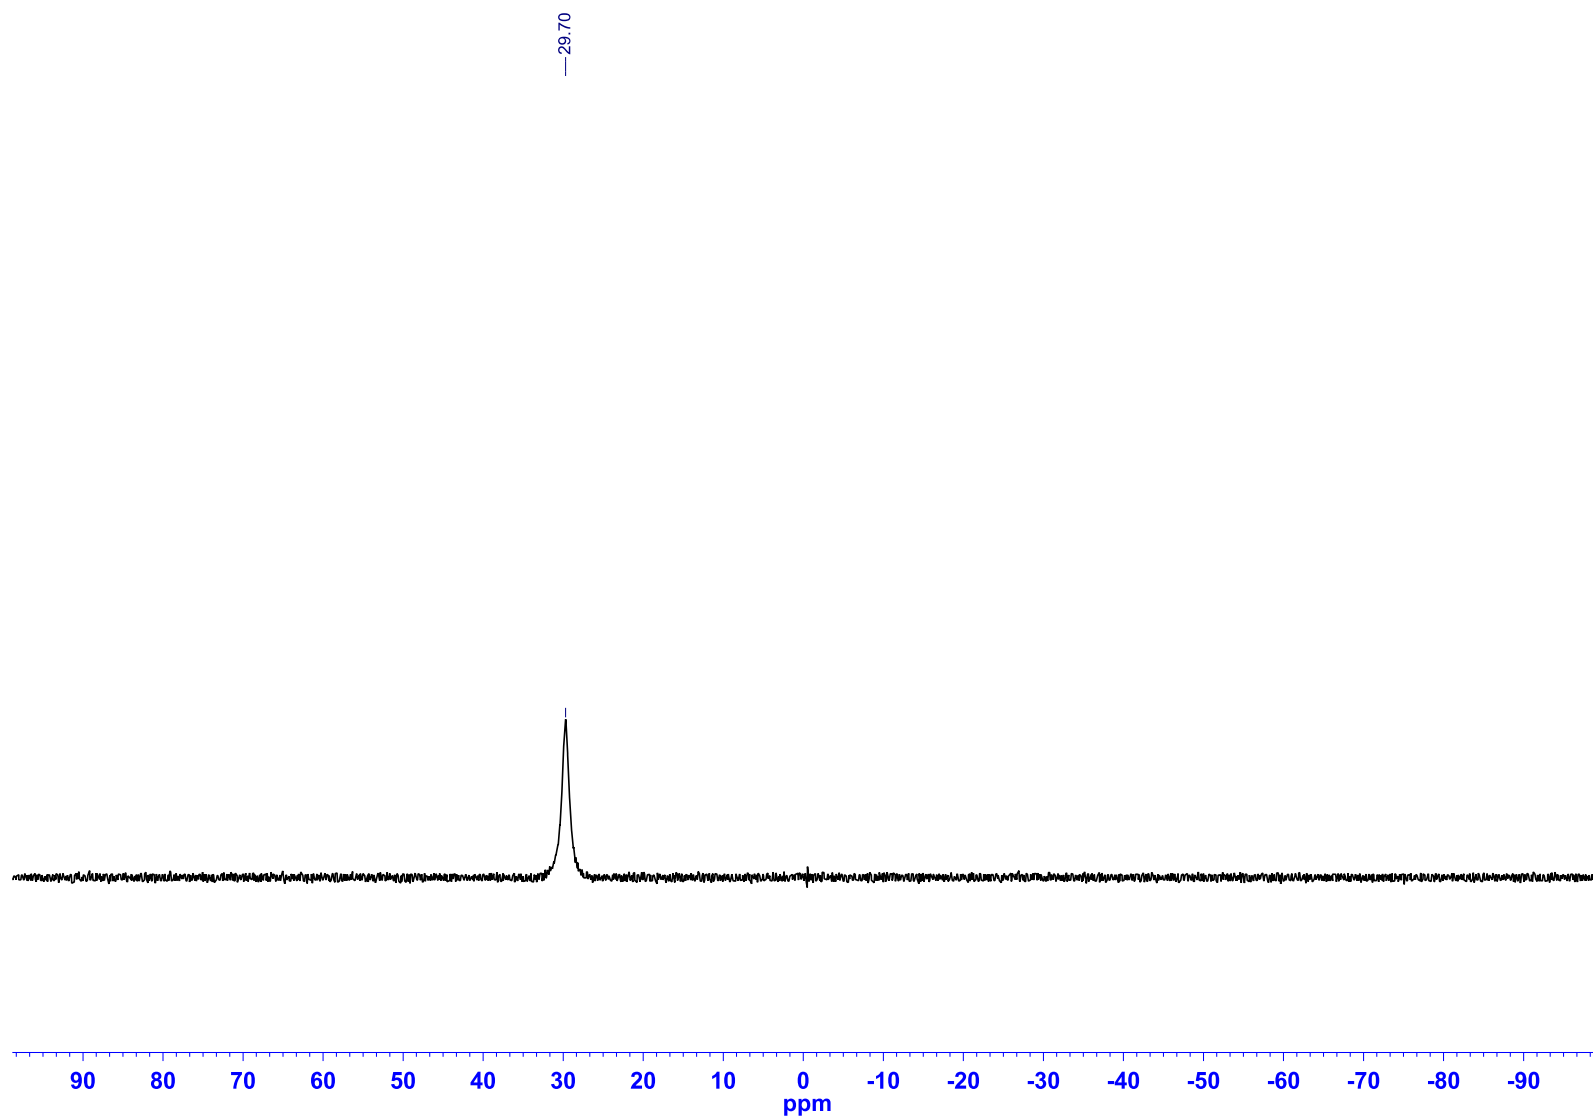

$^{19}\text{F}$  NMR (282.4 MHz,  $\text{CDCl}_3$ ) of 5-fluoro-2-phenyl-2,3-dihydro-1*H*-1,3,2-benzodiazaborole (**5v**)

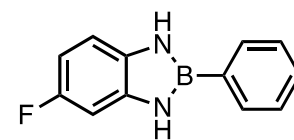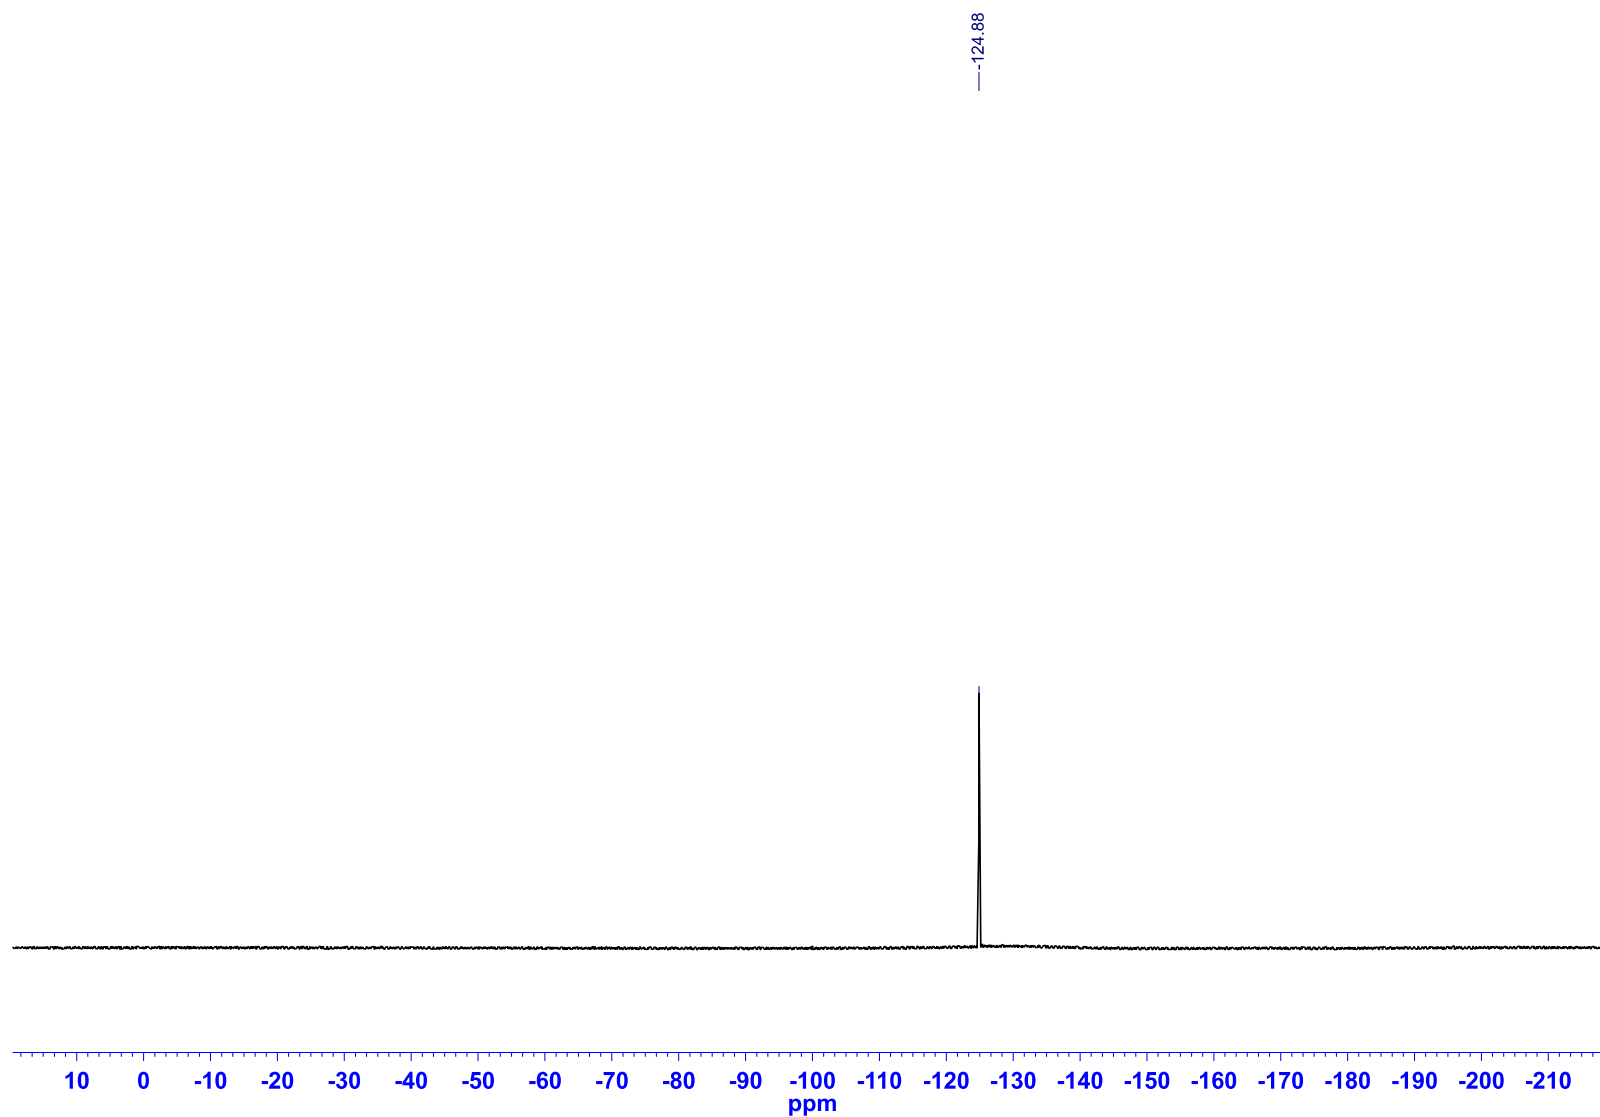

$^1\text{H}$  NMR (500.4 MHz,  $\text{CDCl}_3$ ) of 5-bromo-2-phenyl-2,3-dihydro-1*H*-1,3,2-benzodiazaborole (**5w**)

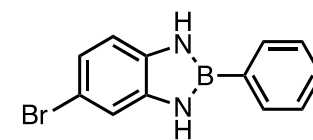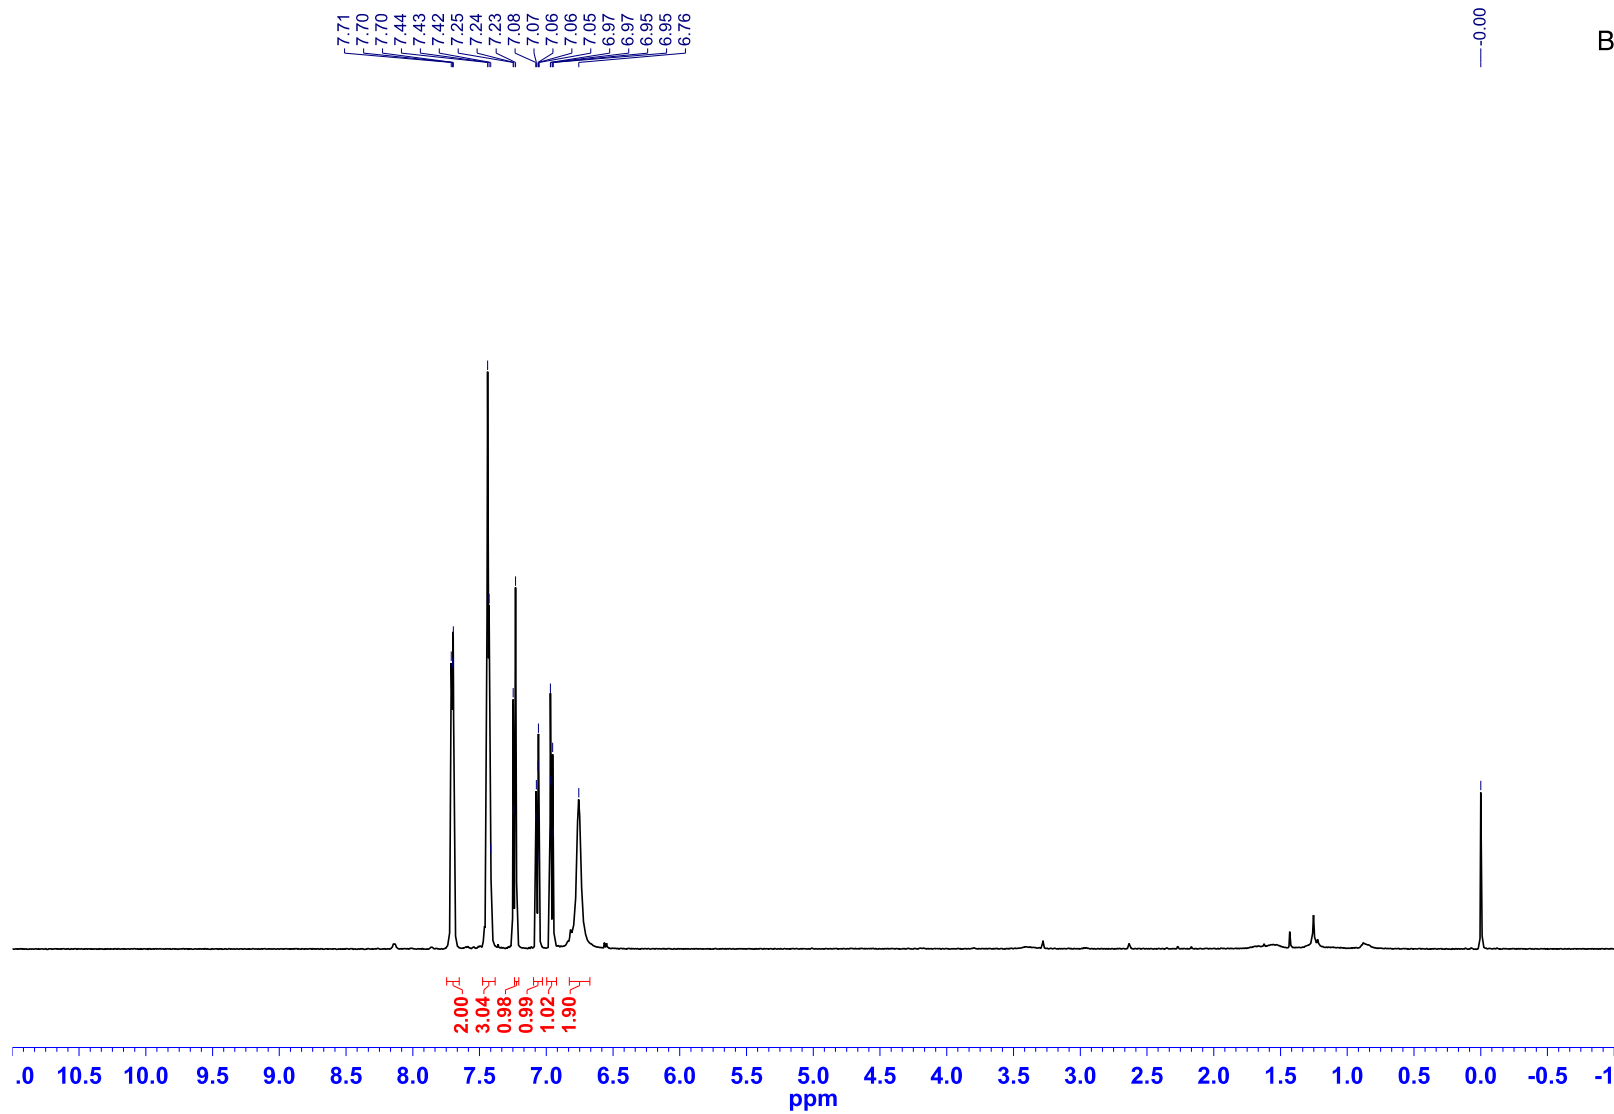

$^{13}\text{C}$  NMR (125.8 MHz,  $\text{CDCl}_3$ ) of 5-bromo-2-phenyl-2,3-dihydro-1*H*-1,3,2-benzodiazaborole (**5w**)

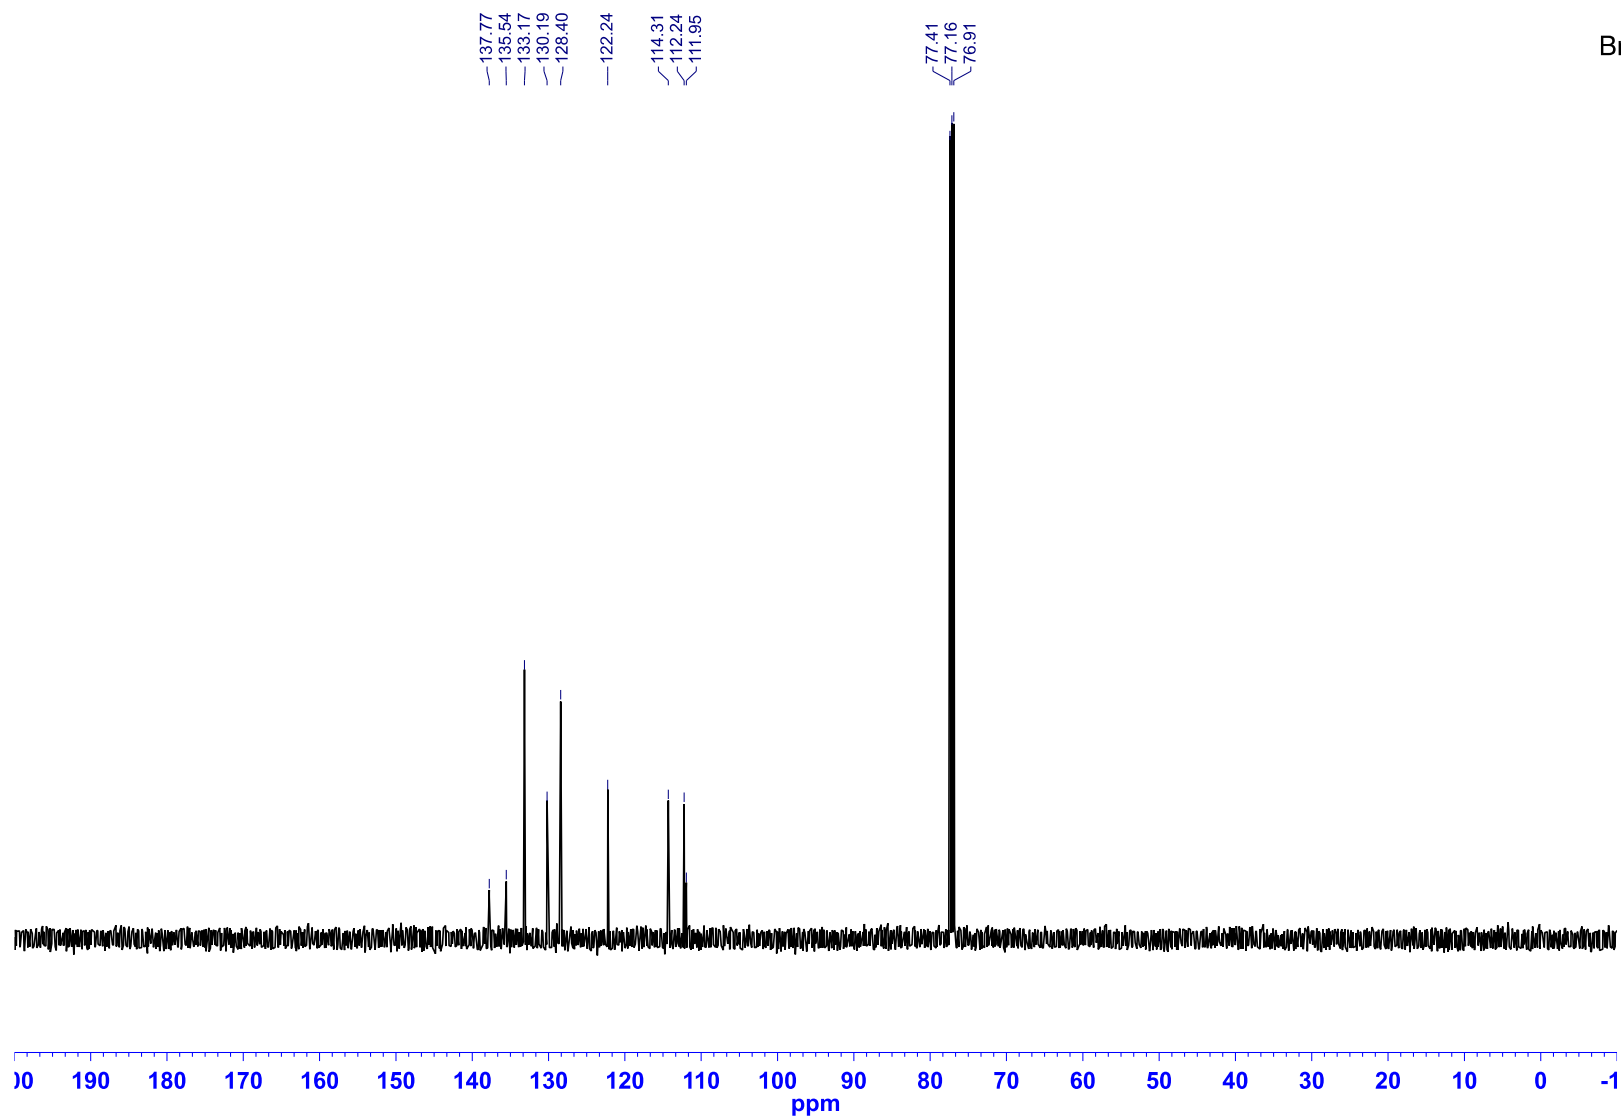

$^{11}\text{B}$  NMR (128.4 MHz, MeCN) of 5-bromo-2-phenyl-2,3-dihydro-1*H*-1,3,2-benzodiazaborole (**5w**)

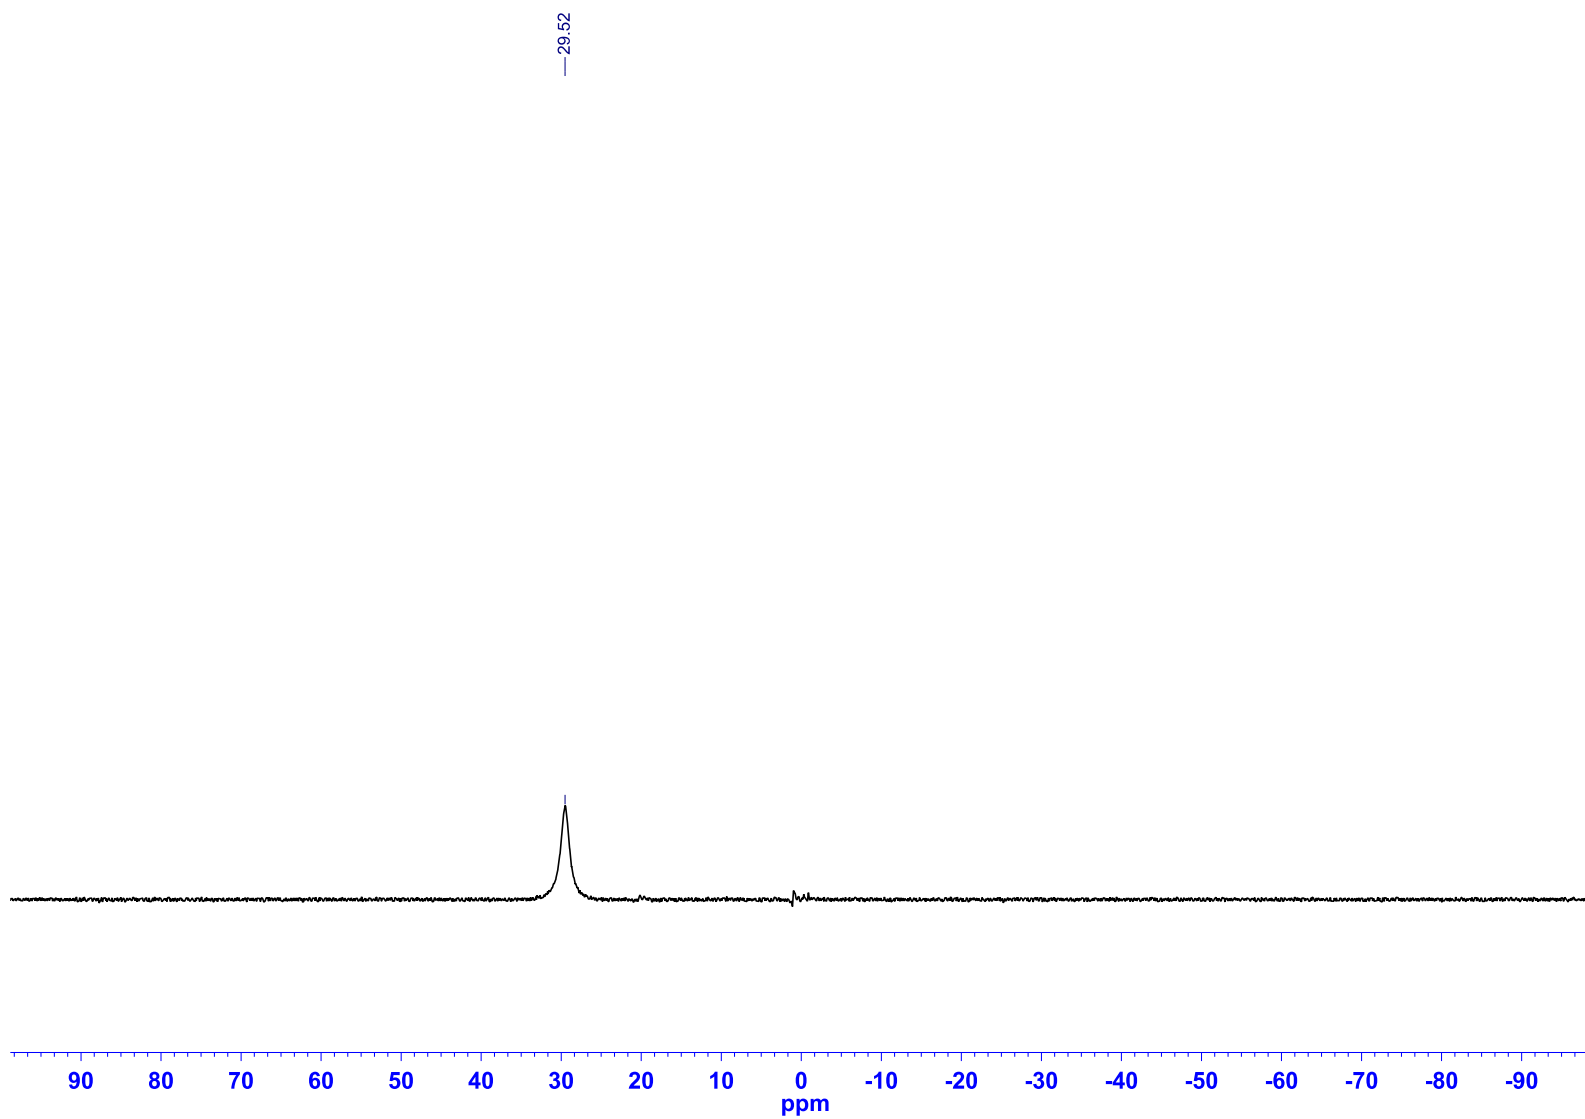

$^1\text{H}$  NMR (500.4 MHz,  $\text{DMSO-}d_6$ ) of 5-phenylcarbonyl-2-phenyl-2,3-dihydro-1*H*-1,3,2-benzodiazaborole (**5x**)

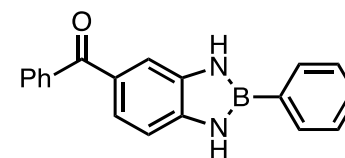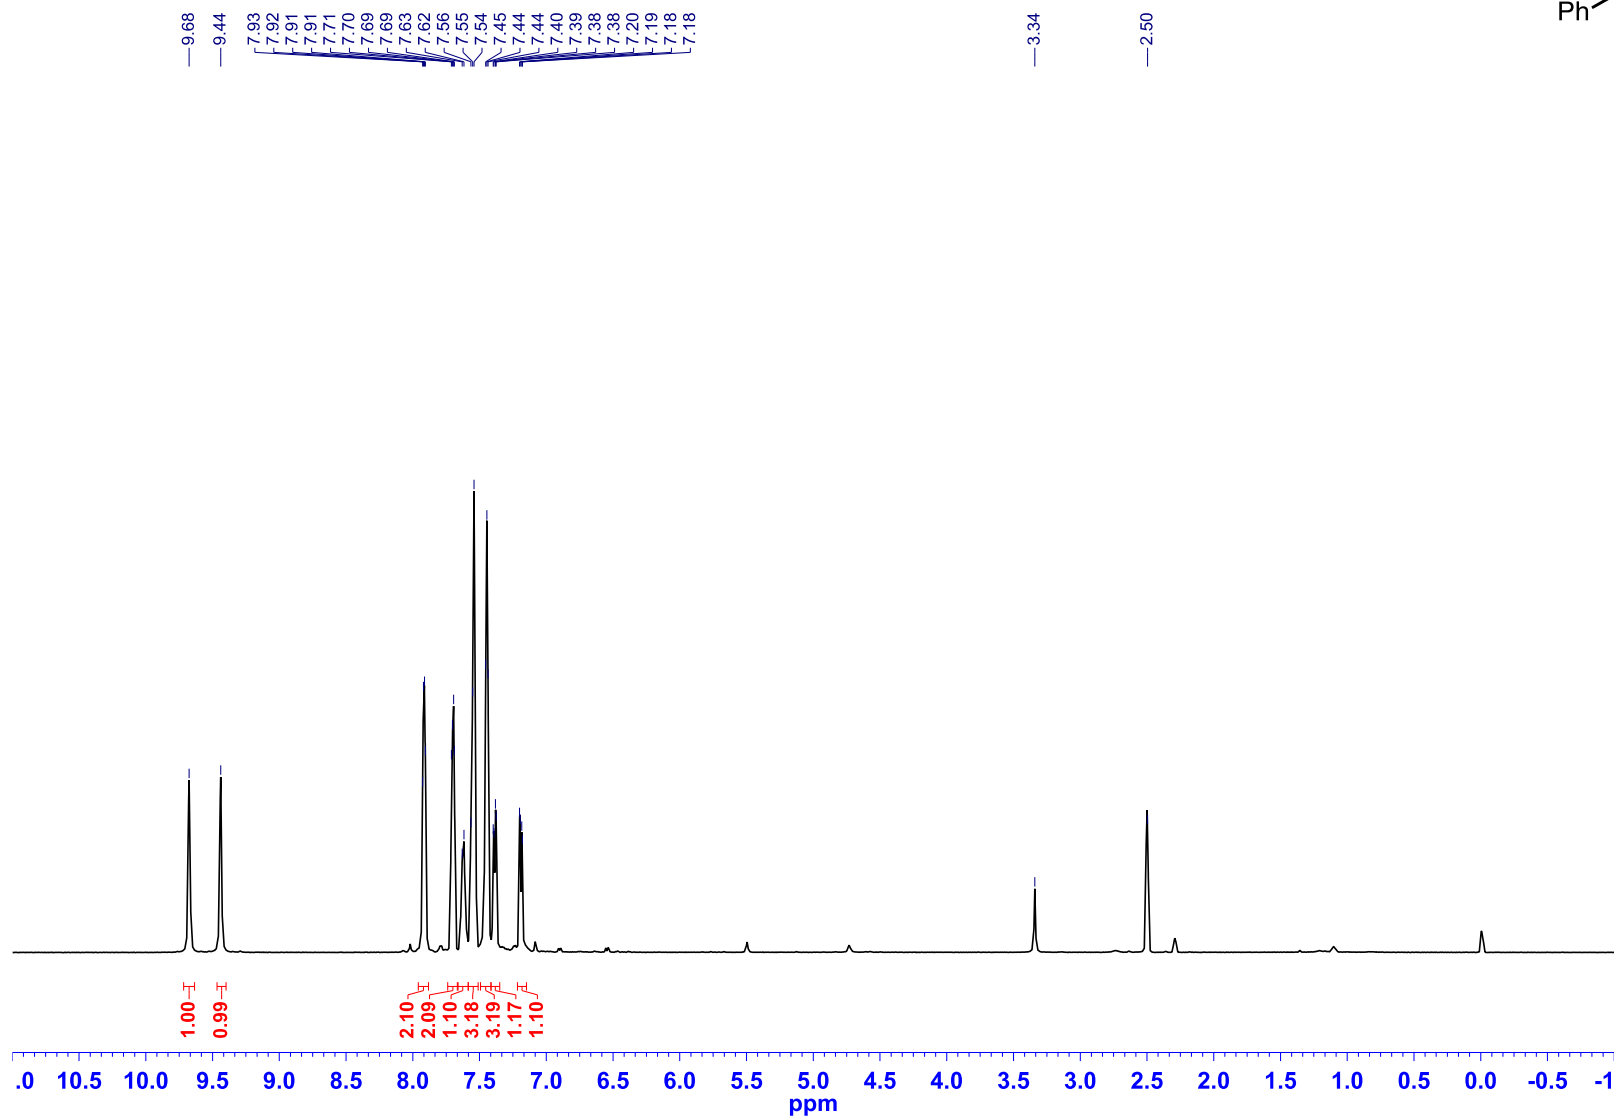



$^{13}\text{C}$  NMR (125.8 MHz,  $\text{DMSO-}d_6$ ) of 5-phenylcarbonyl-2-phenyl-2,3-dihydro-1*H*-1,3,2-benzodiazaborole (**5x**)

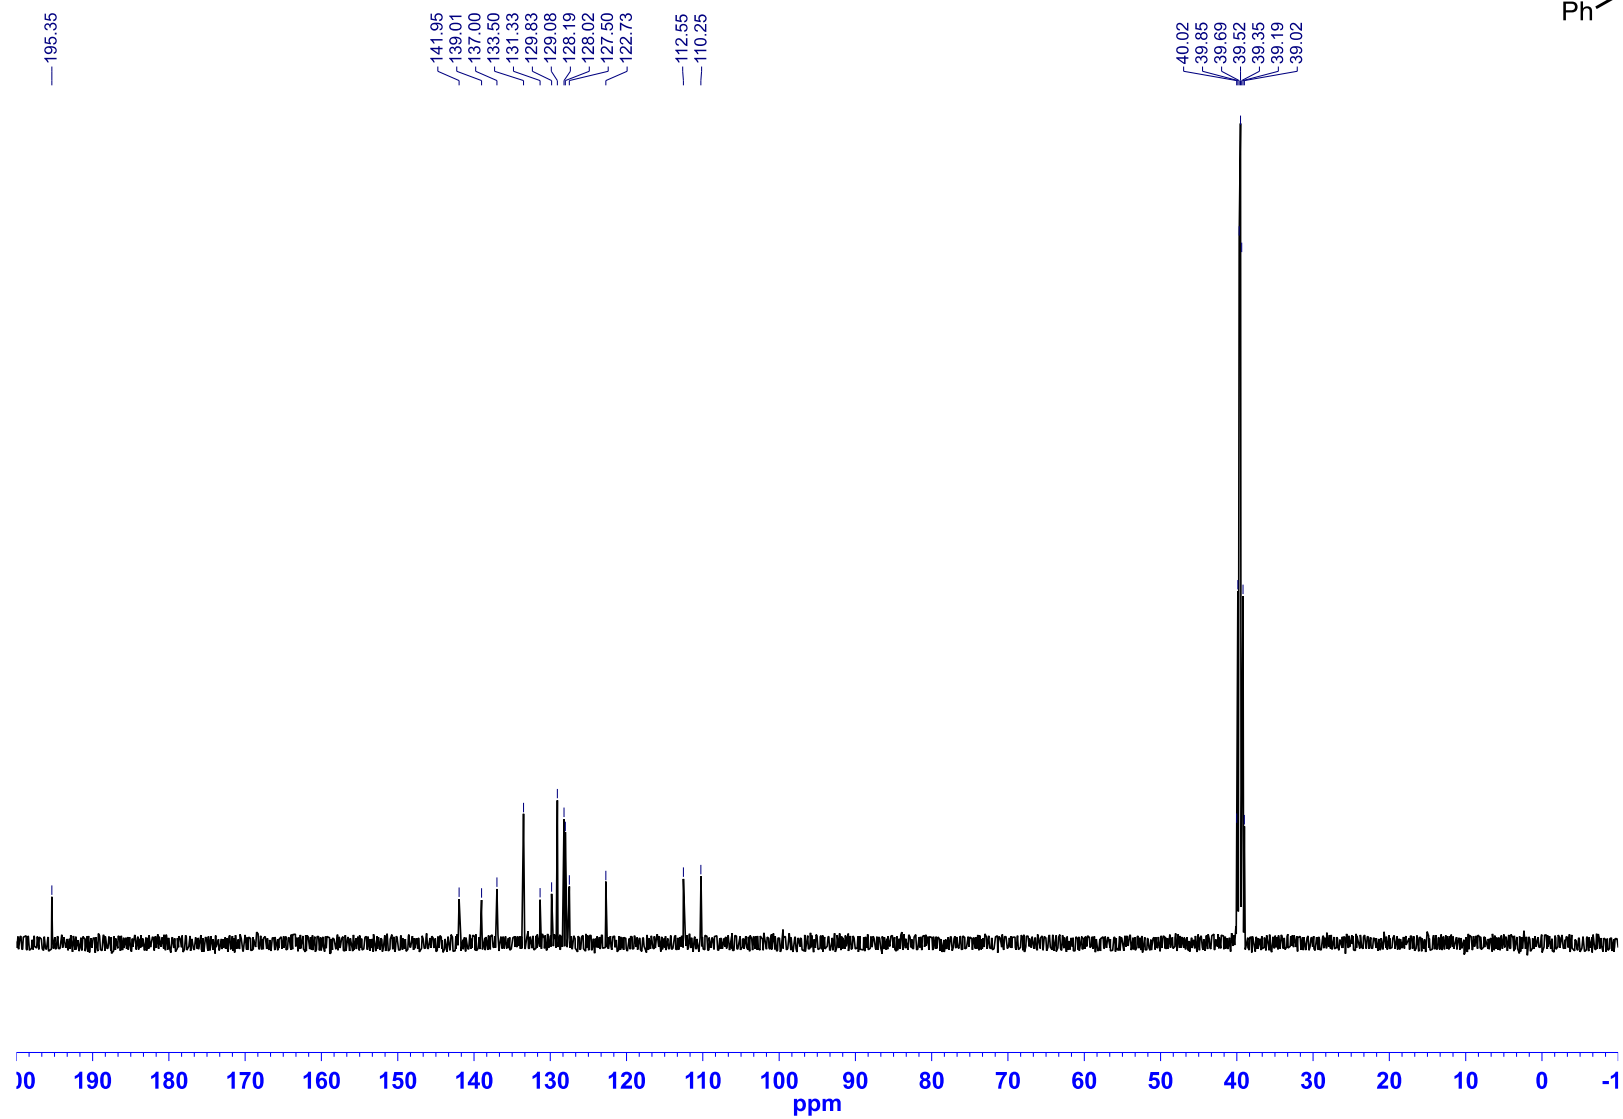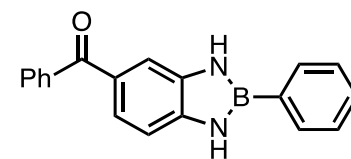

$^{11}\text{B}$  NMR (128.4 MHz, MeCN) of 5-phenylcarbonyl-2-phenyl-2,3-dihydro-1*H*-1,3,2-benzodiazaborole (**5x**)

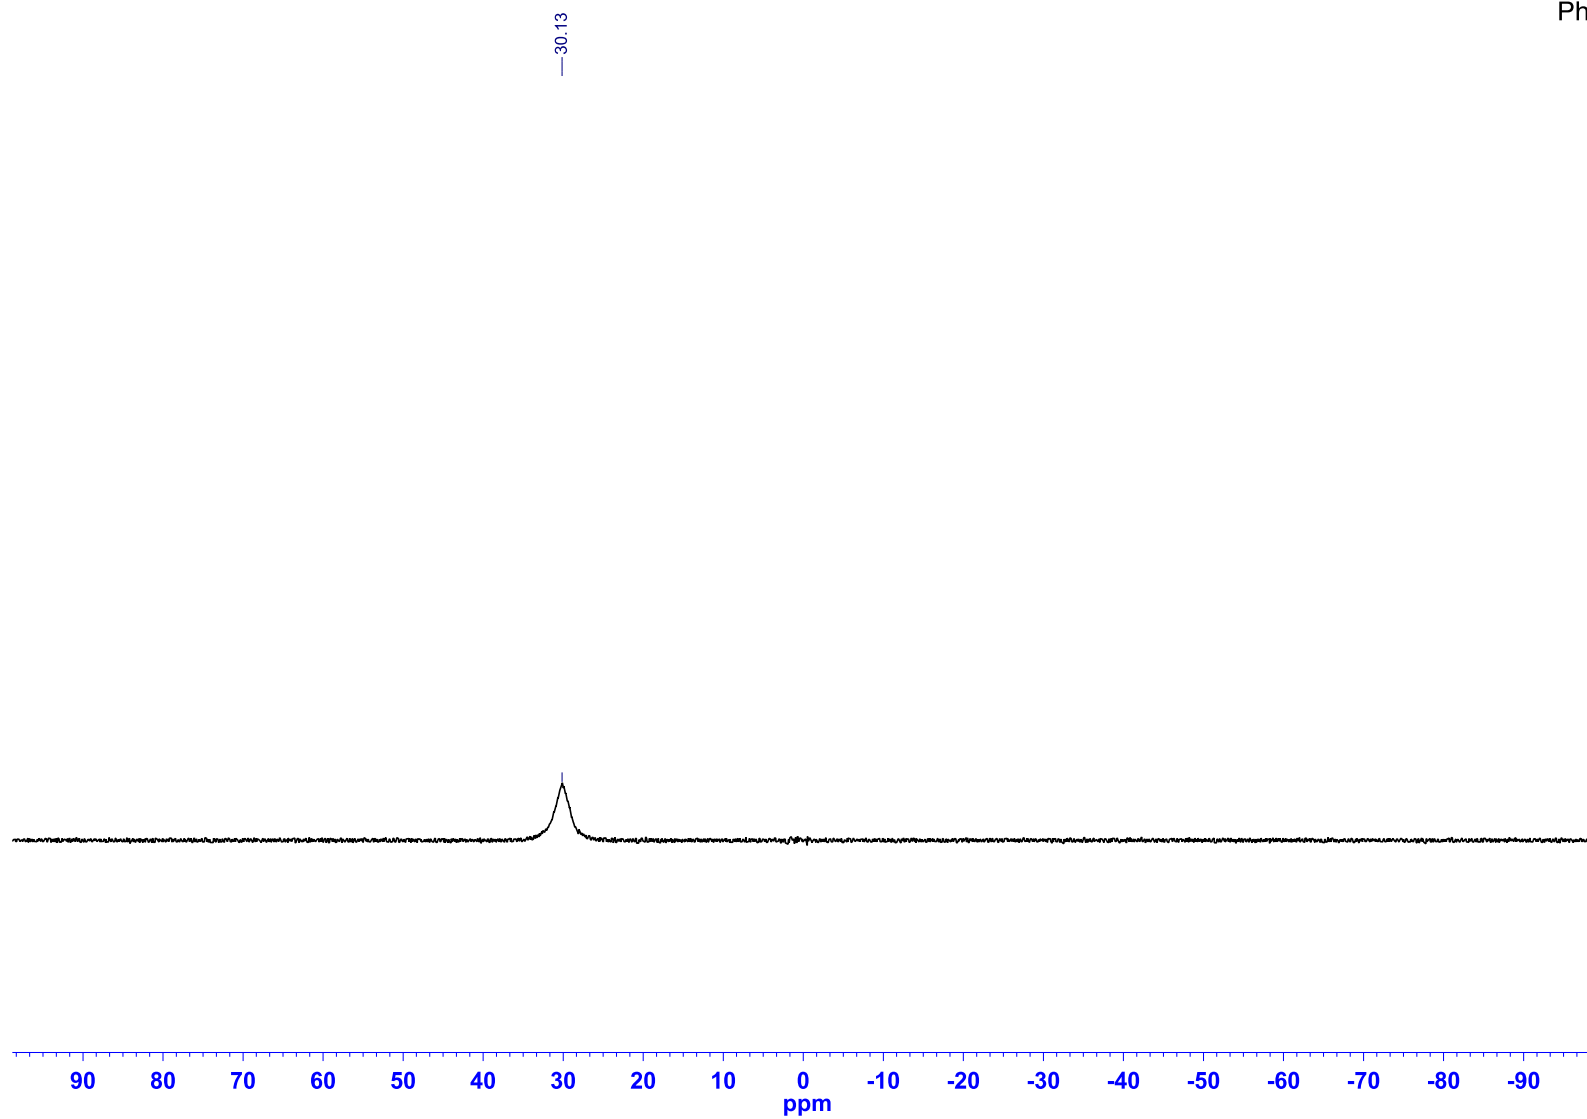

$^1\text{H}$  NMR (500.4 MHz,  $\text{DMSO-}d_6$ ) of 5-nitro-2-phenyl-2,3-dihydro-1*H*-1,3,2-benzodiazaborole (**5y**)

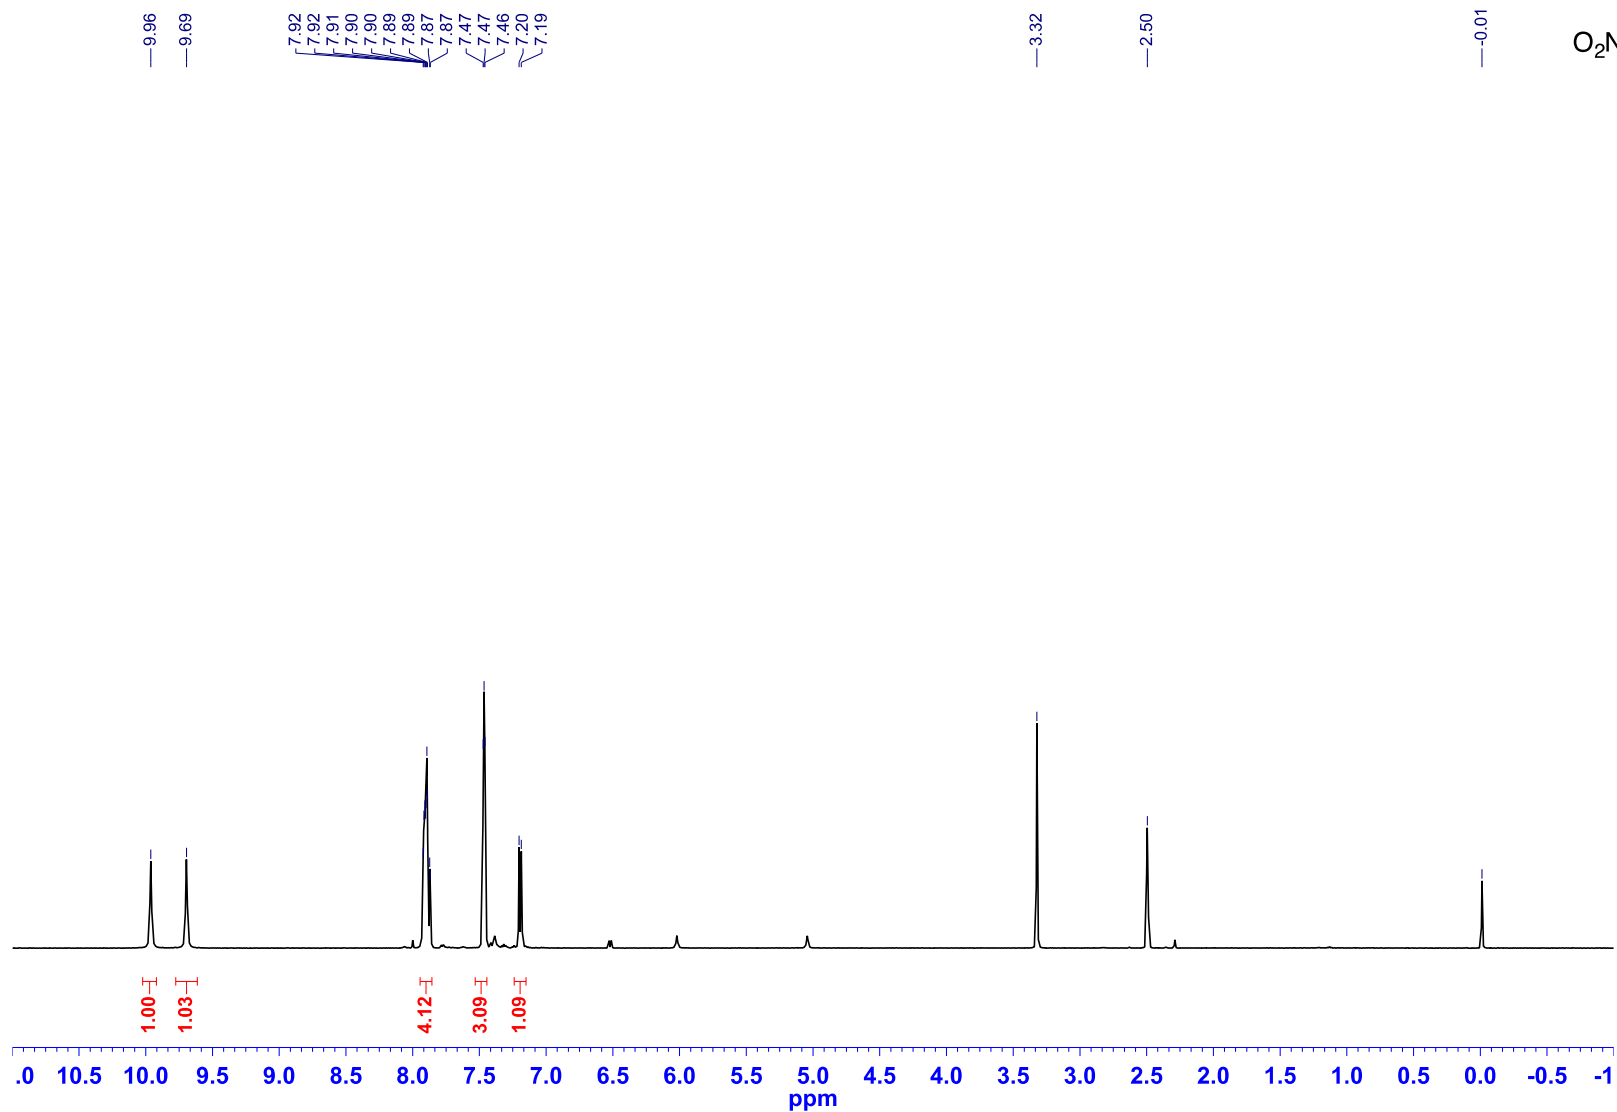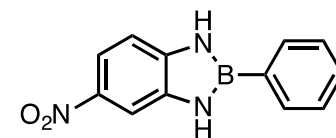

$^{13}\text{C}$  NMR (125.8 MHz,  $\text{DMSO-}d_6$ ) of 5-nitro-2-phenyl-2,3-dihydro-1*H*-1,3,2-benzodiazaborole (**5y**)

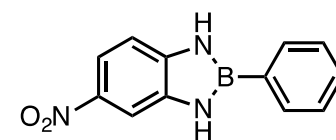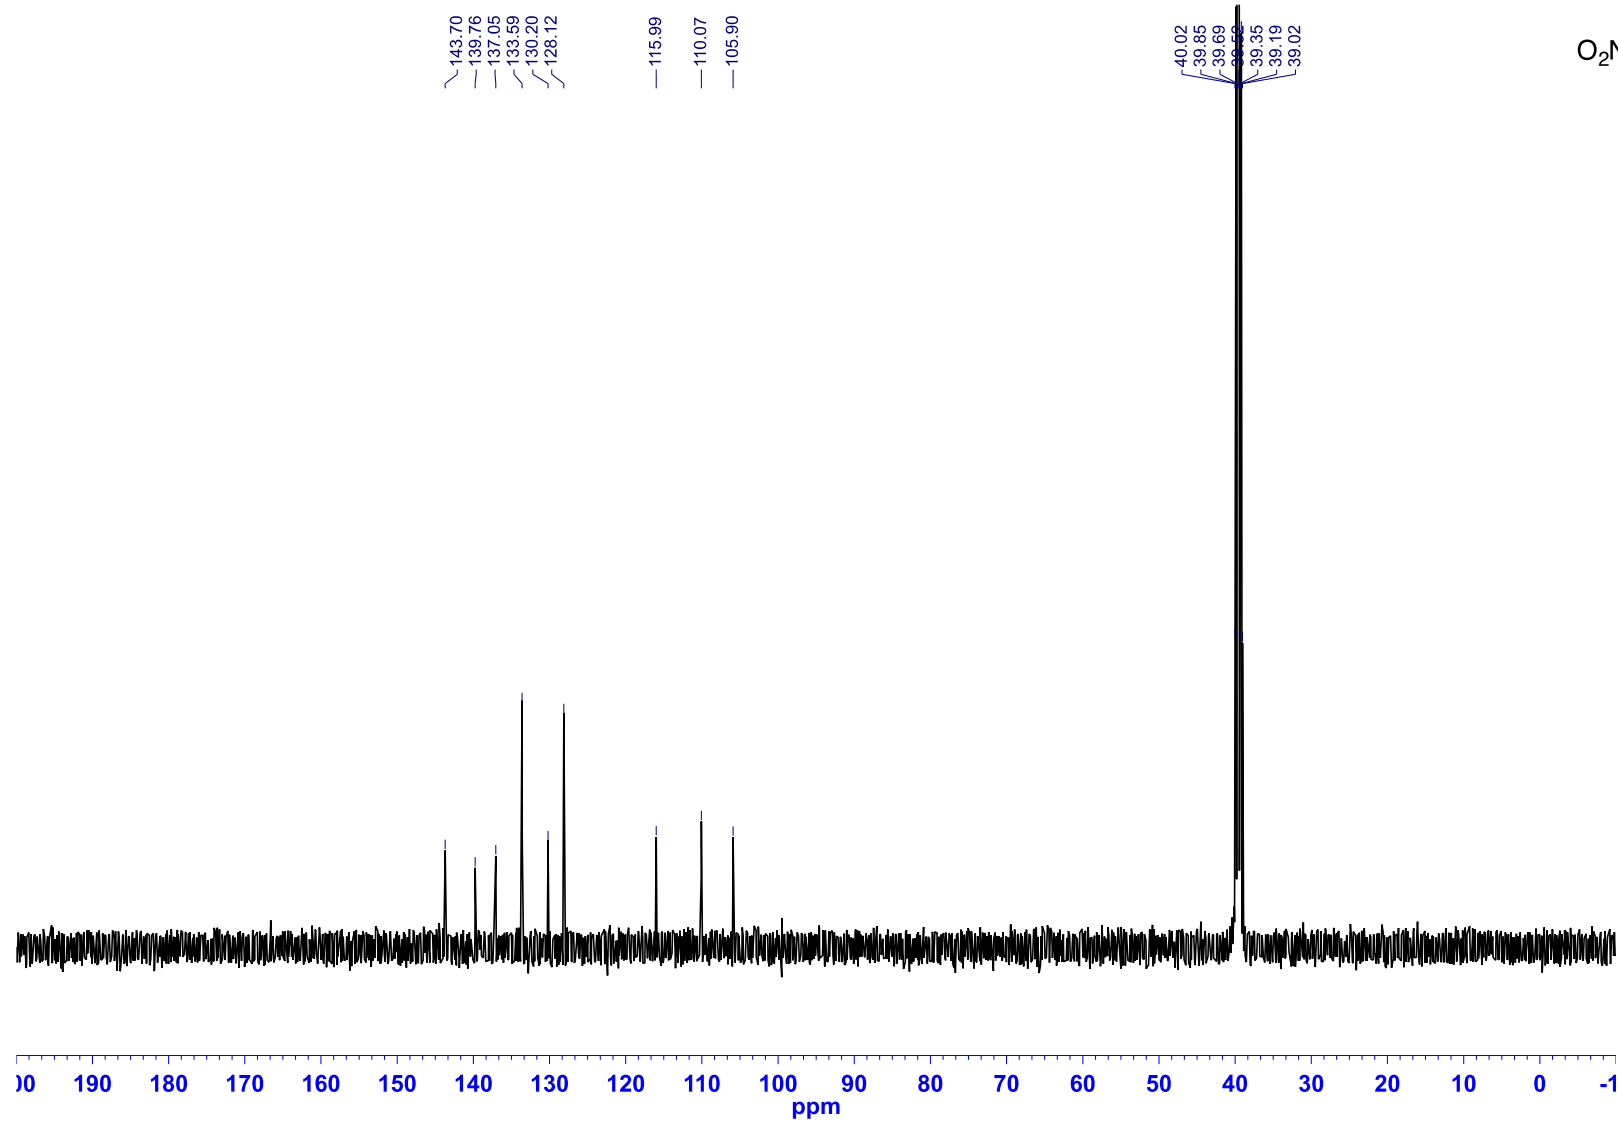

$^{11}\text{B}$  NMR (128.4 MHz, MeCN) of 5-nitro-2-phenyl-2,3-dihydro-1*H*-1,3,2-benzodiazaborole (**5y**)

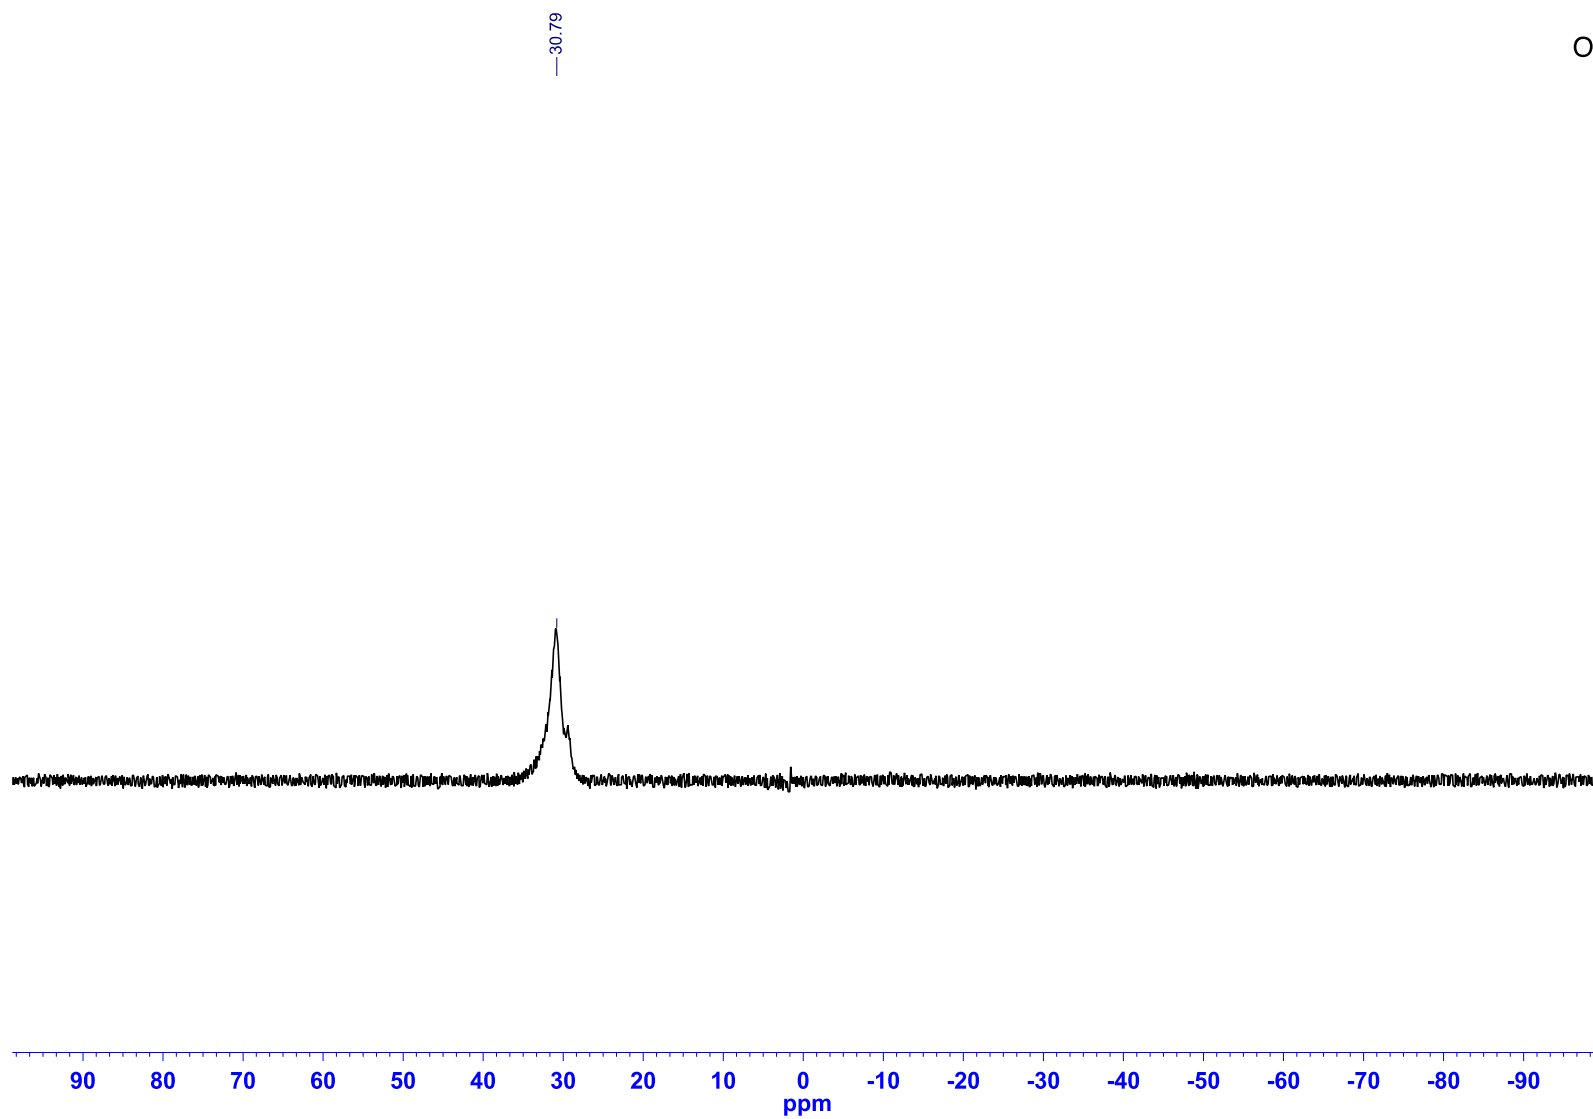

$^1\text{H}$  NMR (500.4 MHz,  $\text{DMSO-}d_6$ ) of 2-phenyl-2,3-dihydro-1*H*-1,3,2-naphthodiazaborole (**5z**)

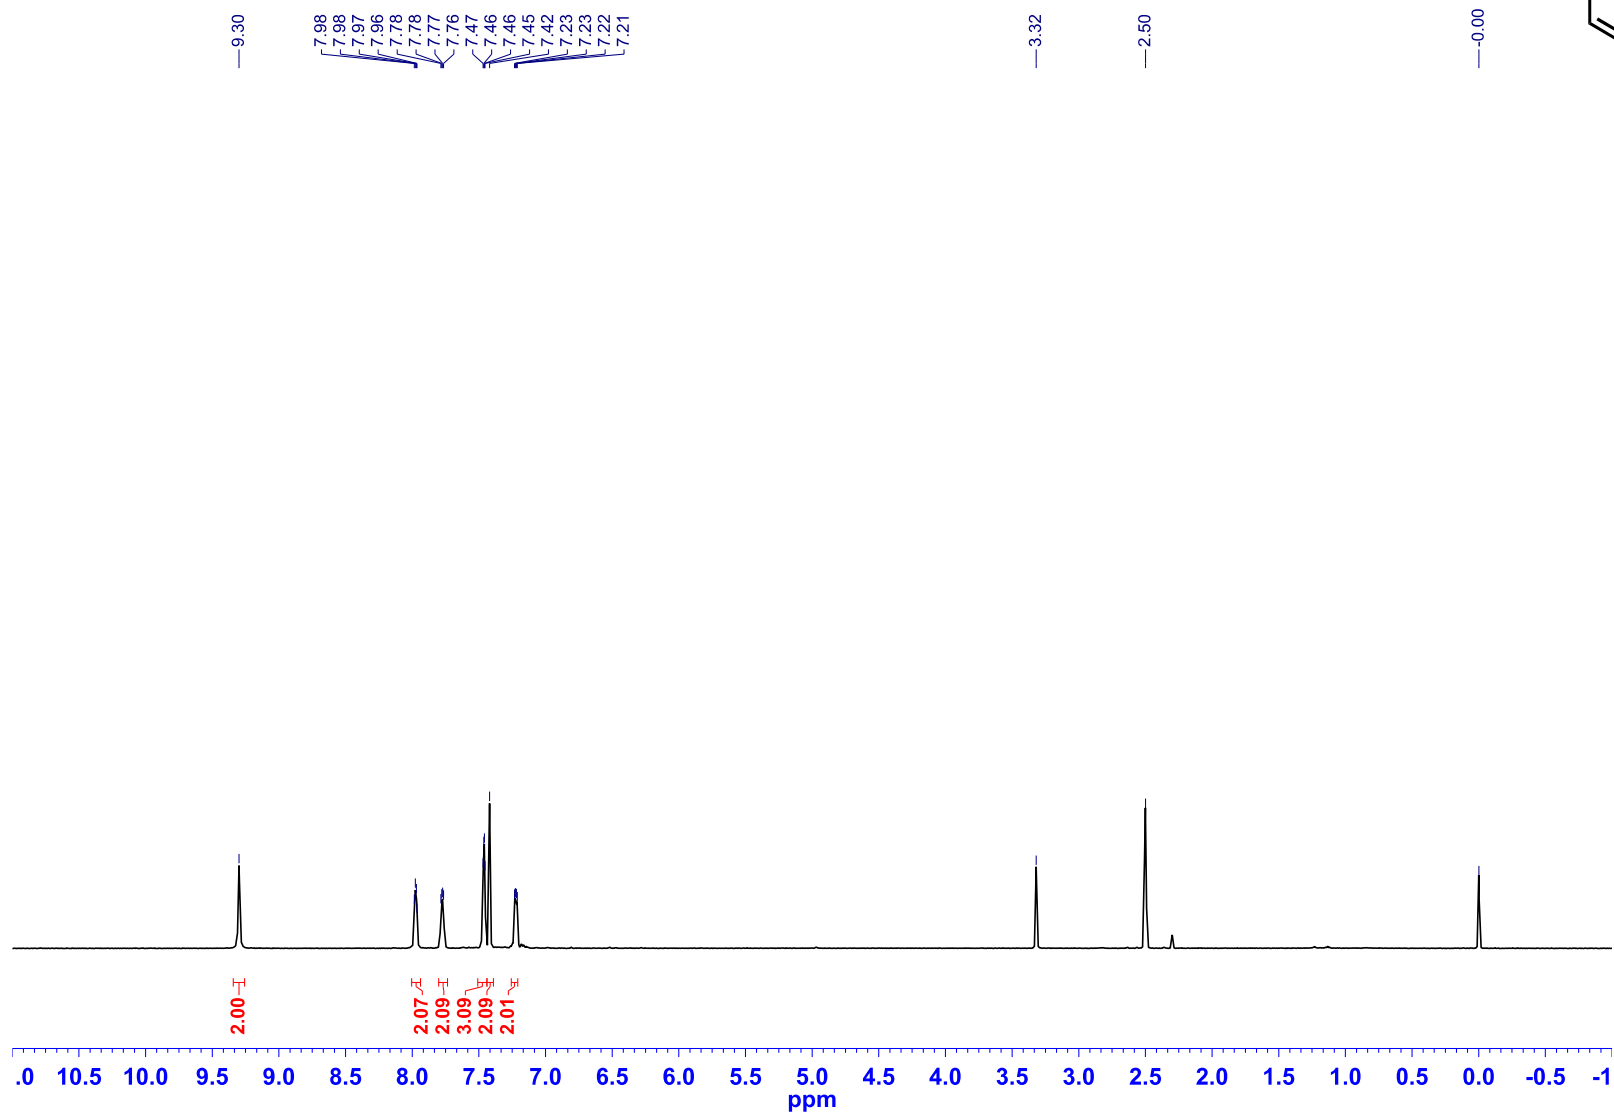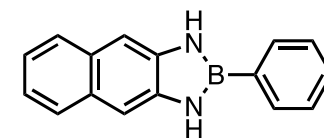

$^{13}\text{C}$  NMR (125.8 MHz,  $\text{DMSO-}d_6$ ) of 2-phenyl-2,3-dihydro-1*H*-1,3,2-naphthodiazaborole (**5z**)

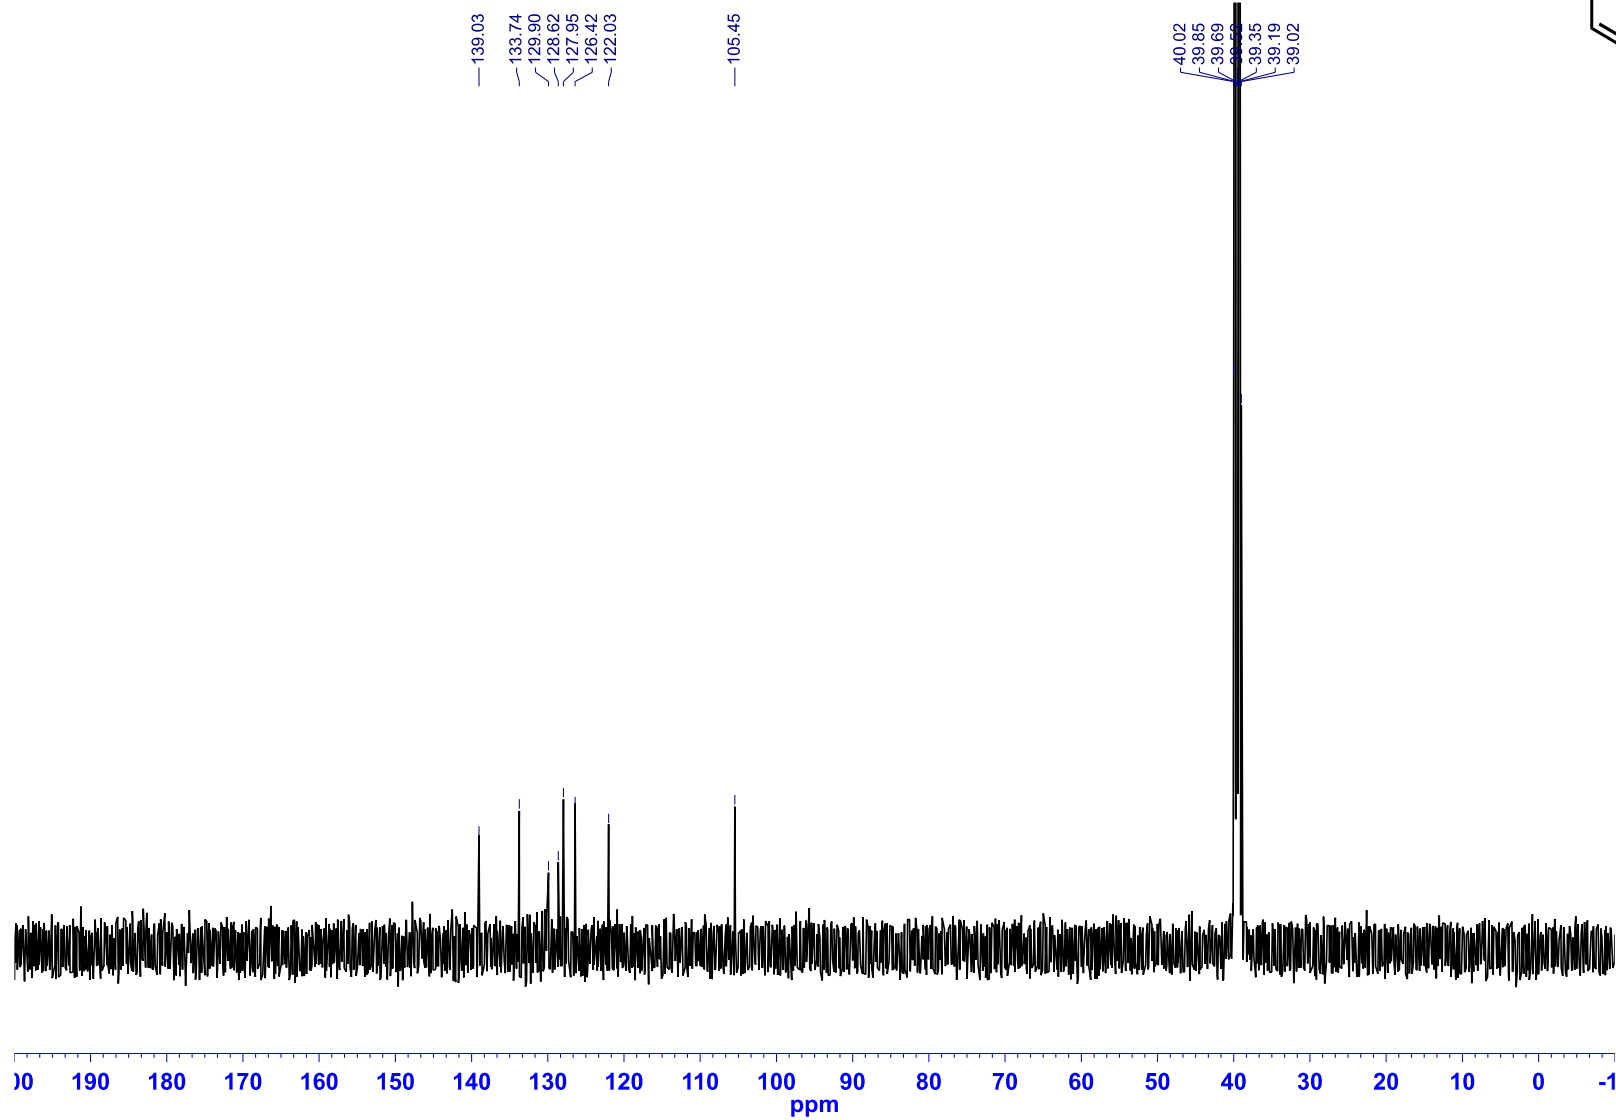

$^{11}\text{B}$  NMR (128.4 MHz, MeCN) of 2-phenyl-2,3-dihydro-1*H*-1,3,2-naphthodiazaborole (**5z**)

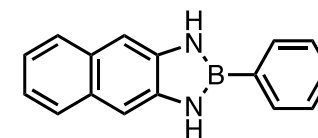

—31.00

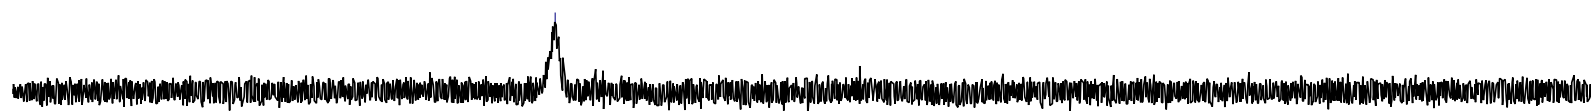

90 80 70 60 50 40 30 20 10 0 ppm -10 -20 -30 -40 -50 -60 -70 -80 -90



$^1\text{H}$  NMR (500.4 MHz,  $\text{CDCl}_3$ ) of (*E*)-2-(1-propenyl)-2,3-dihydro-1*H*-1,3,2-benzodiazaborole (**6a**)

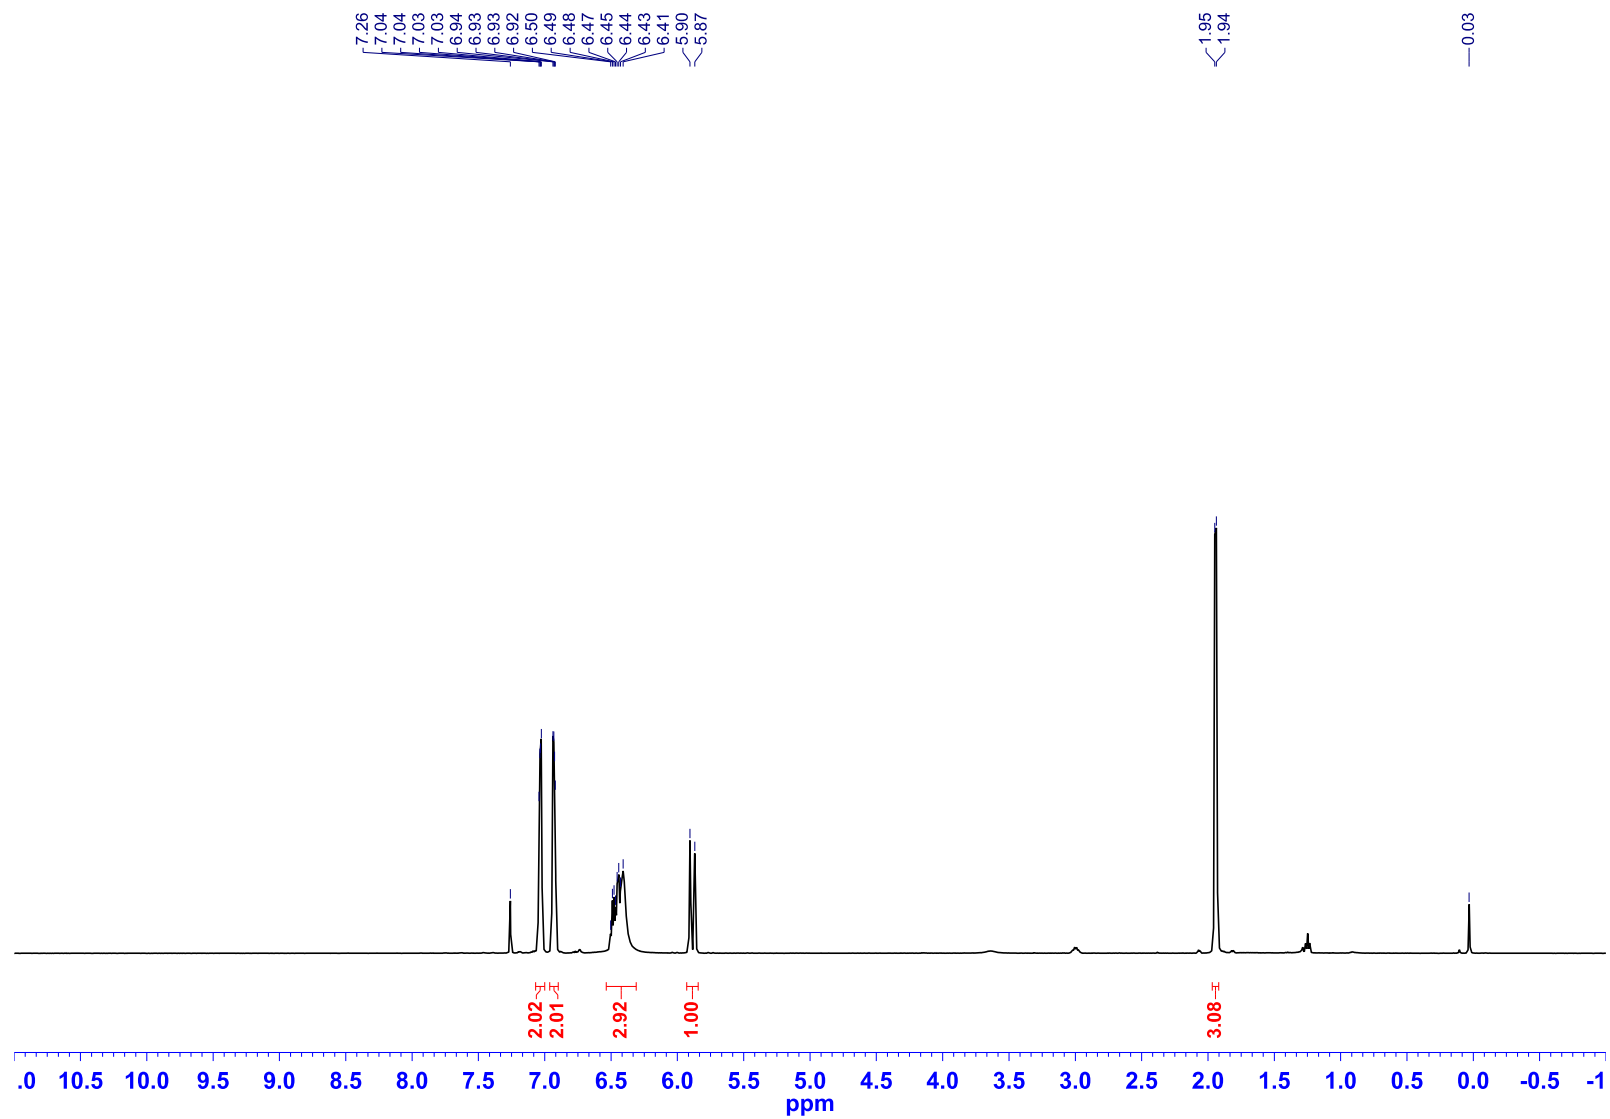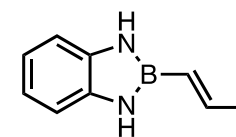

$^{13}\text{C}$  NMR (125.8 MHz,  $\text{CDCl}_3$ ) of (*E*)-2-(1-propenyl)-2,3-dihydro-1*H*-1,3,2-benzodiazaborole (**6a**)

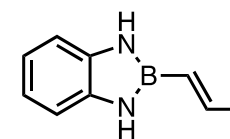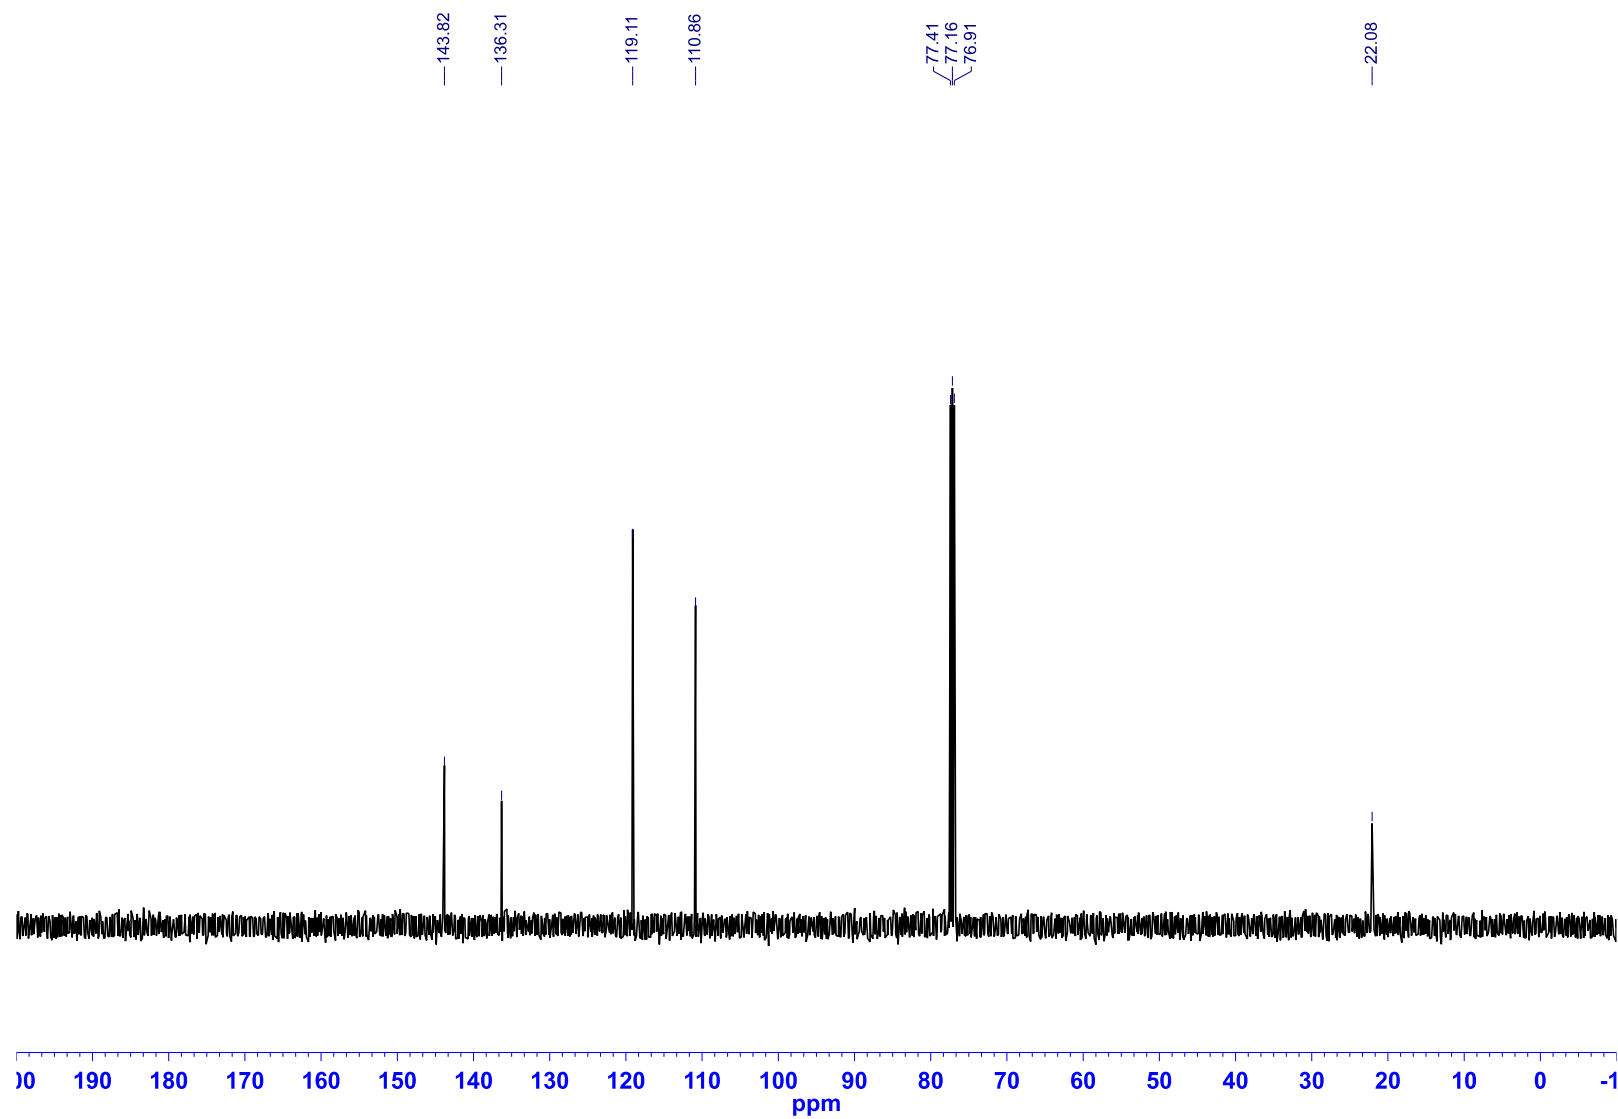

$^{11}\text{B}$  NMR (128.4 MHz,  $\text{CDCl}_3$ ) of (*E*)-2-(1-propenyl)-2,3-dihydro-1*H*-1,3,2-benzodiazaborole (**6a**)

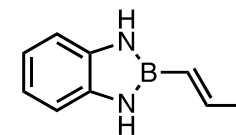

—26.92

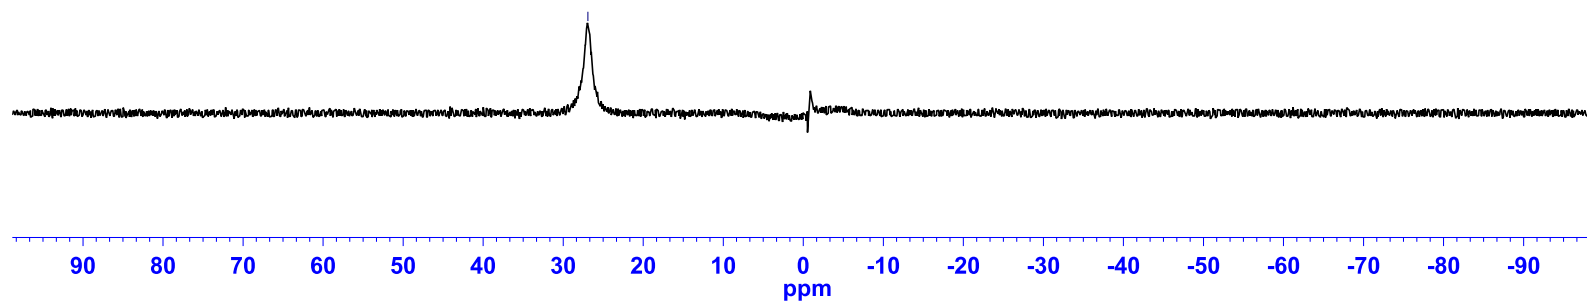

$^1\text{H}$  NMR (500.4 MHz,  $\text{CDCl}_3$ ) of 2-(1-cyclohexenyl)-2,3-dihydro-1*H*-1,3,2-benzodiazaborole (**6b**)

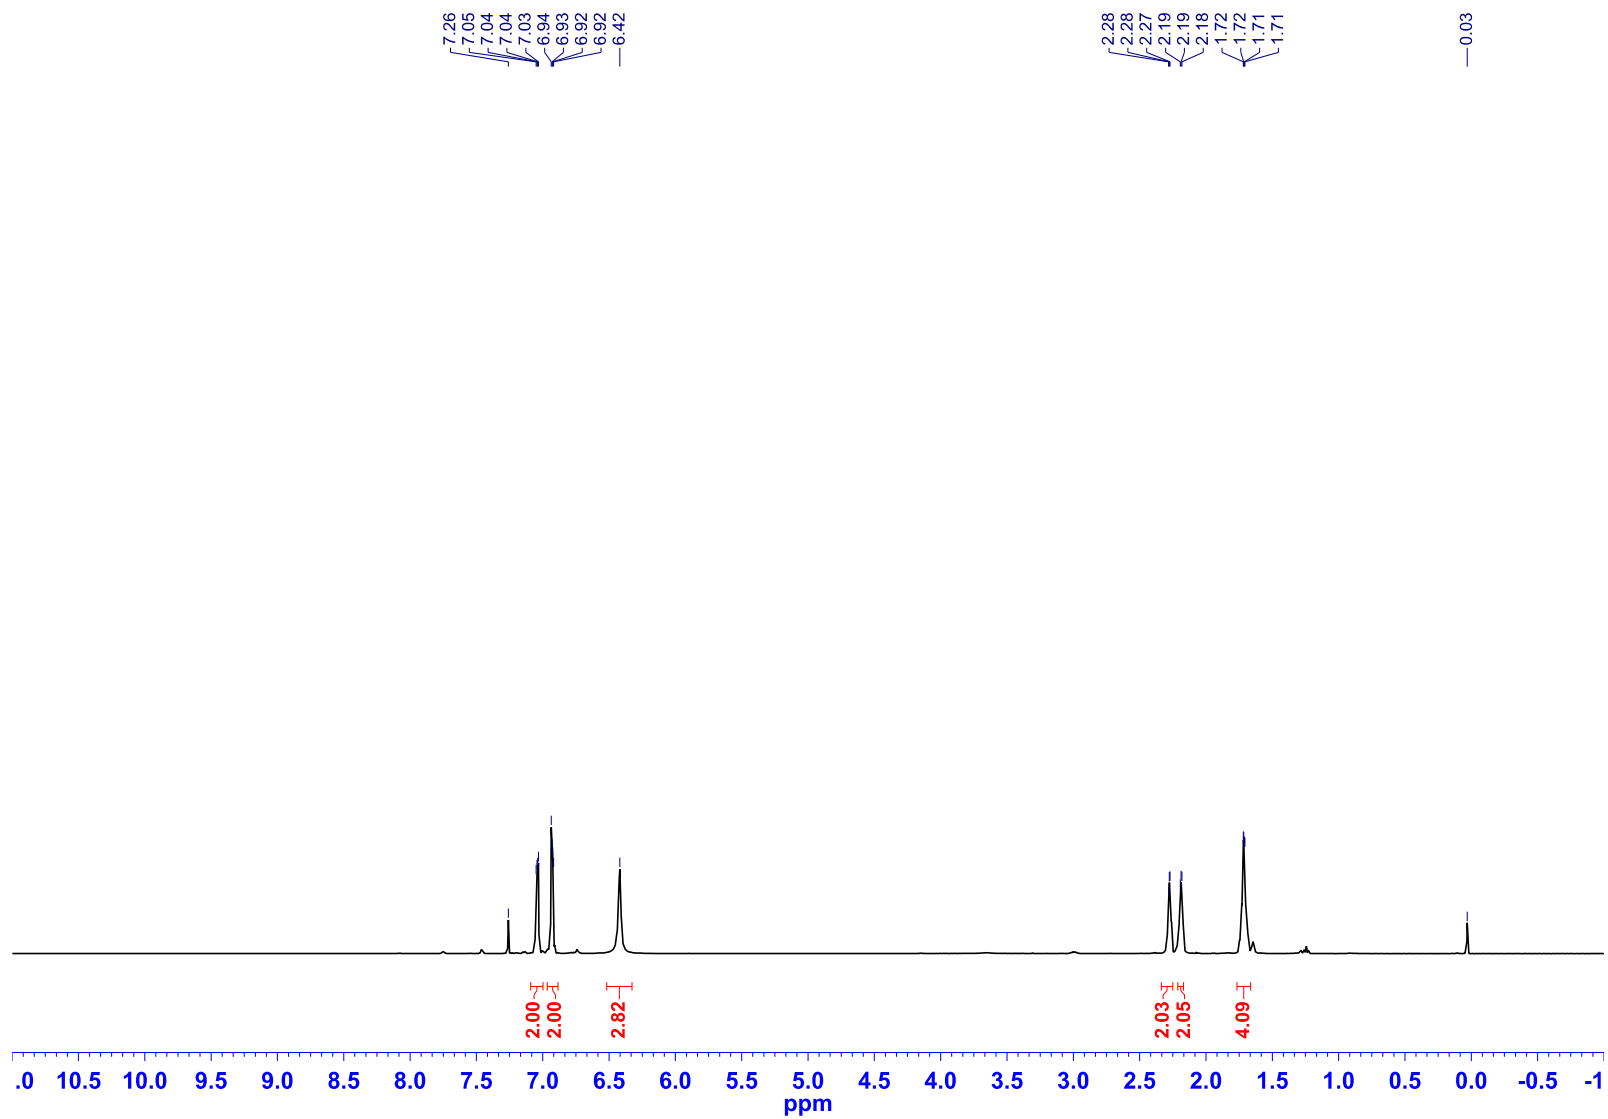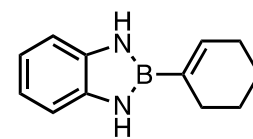

$^{13}\text{C}$  NMR (125.8 MHz,  $\text{CDCl}_3$ ) of 2-(1-cyclohexenyl)-2,3-dihydro-1*H*-1,3,2-benzodiazaborole (**6b**)

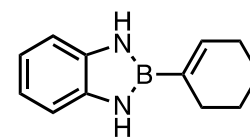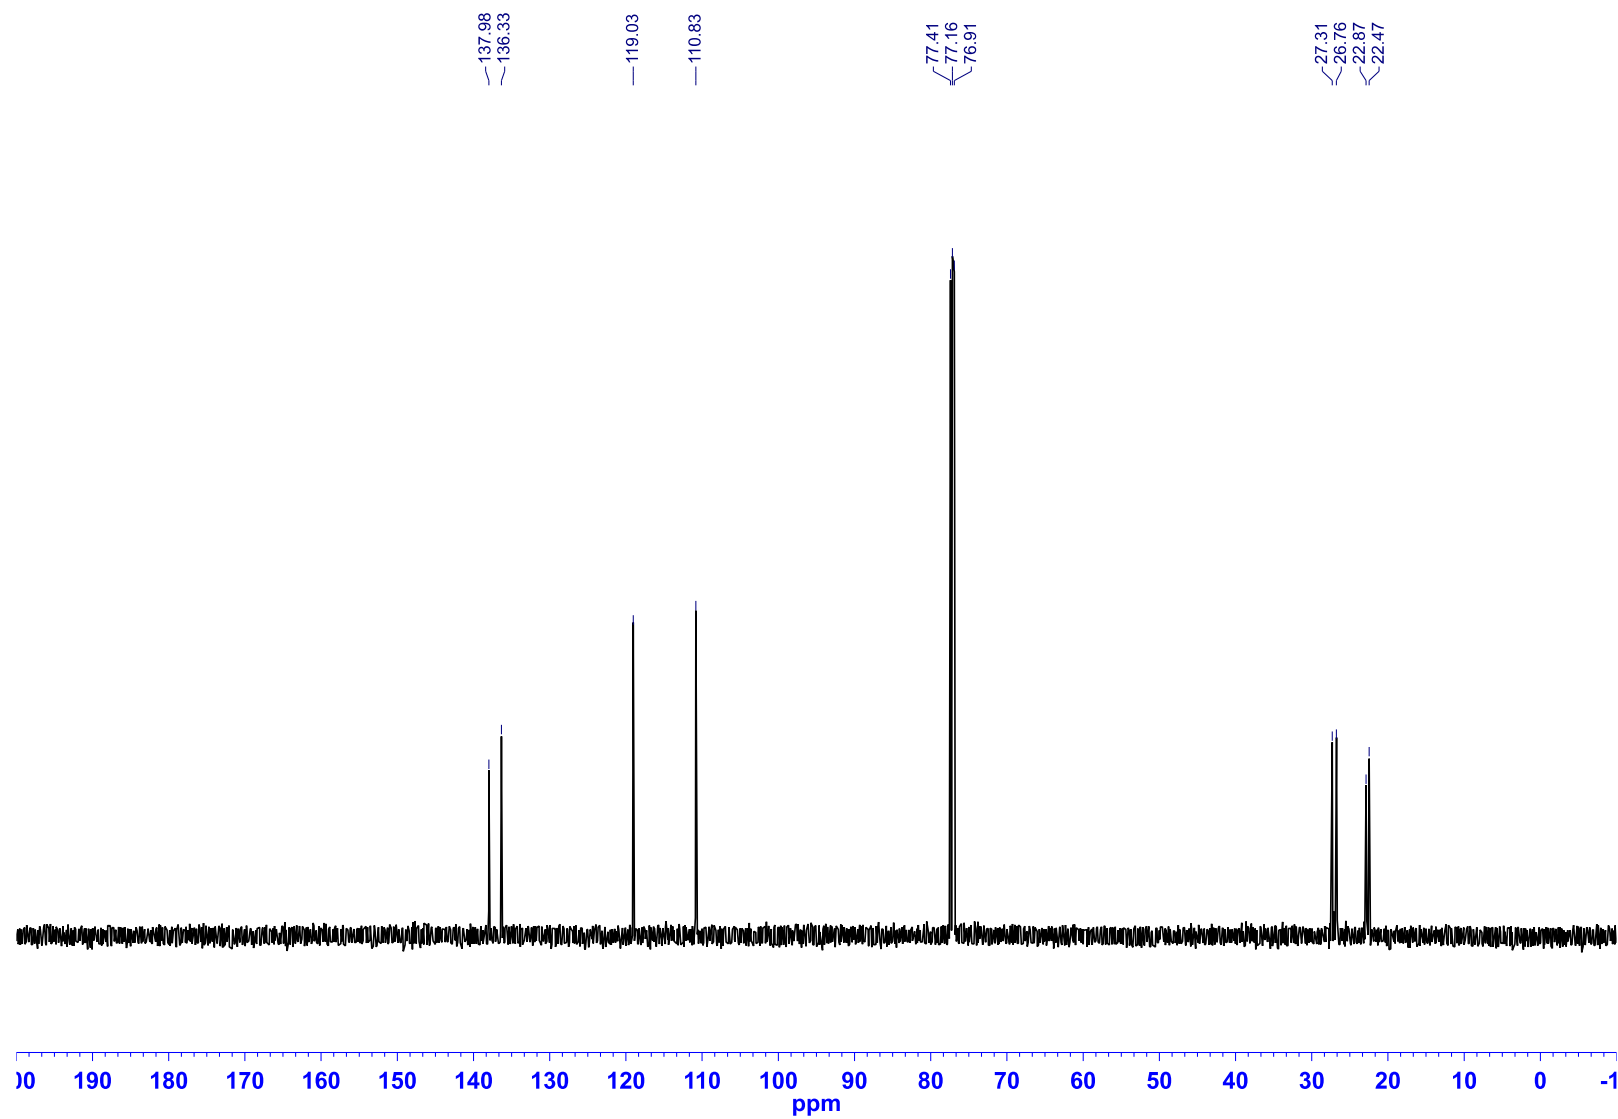

$^{11}\text{B}$  NMR (128.4 MHz,  $\text{CDCl}_3$ ) of 2-(1-cyclohexenyl)-2,3-dihydro-1*H*-1,3,2-benzodiazaborole (**6b**)

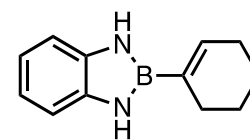

—27.83

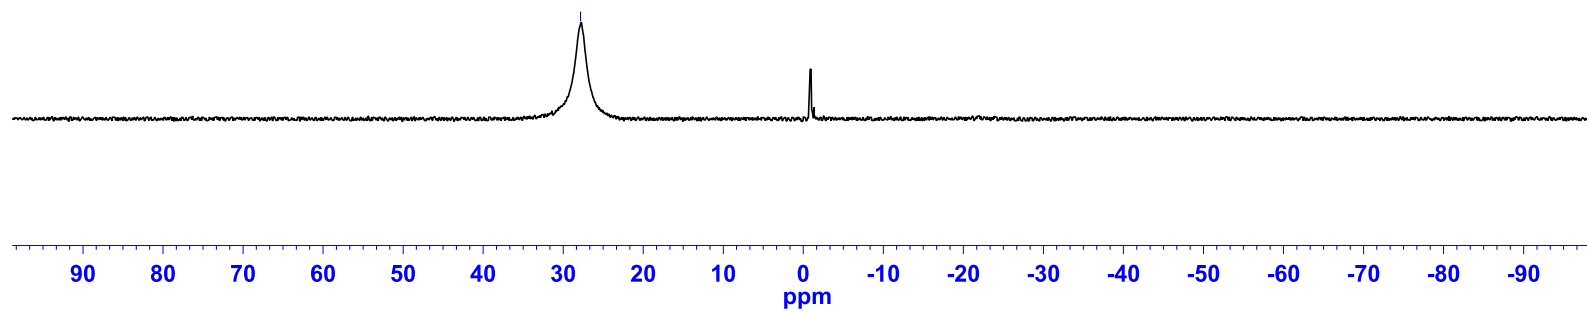

$^1\text{H}$  NMR (500.4 MHz,  $\text{CDCl}_3$ ) of 2-vinyl-2,3-dihydro-1*H*-1,3,2-benzodiazaborole (**6c**)

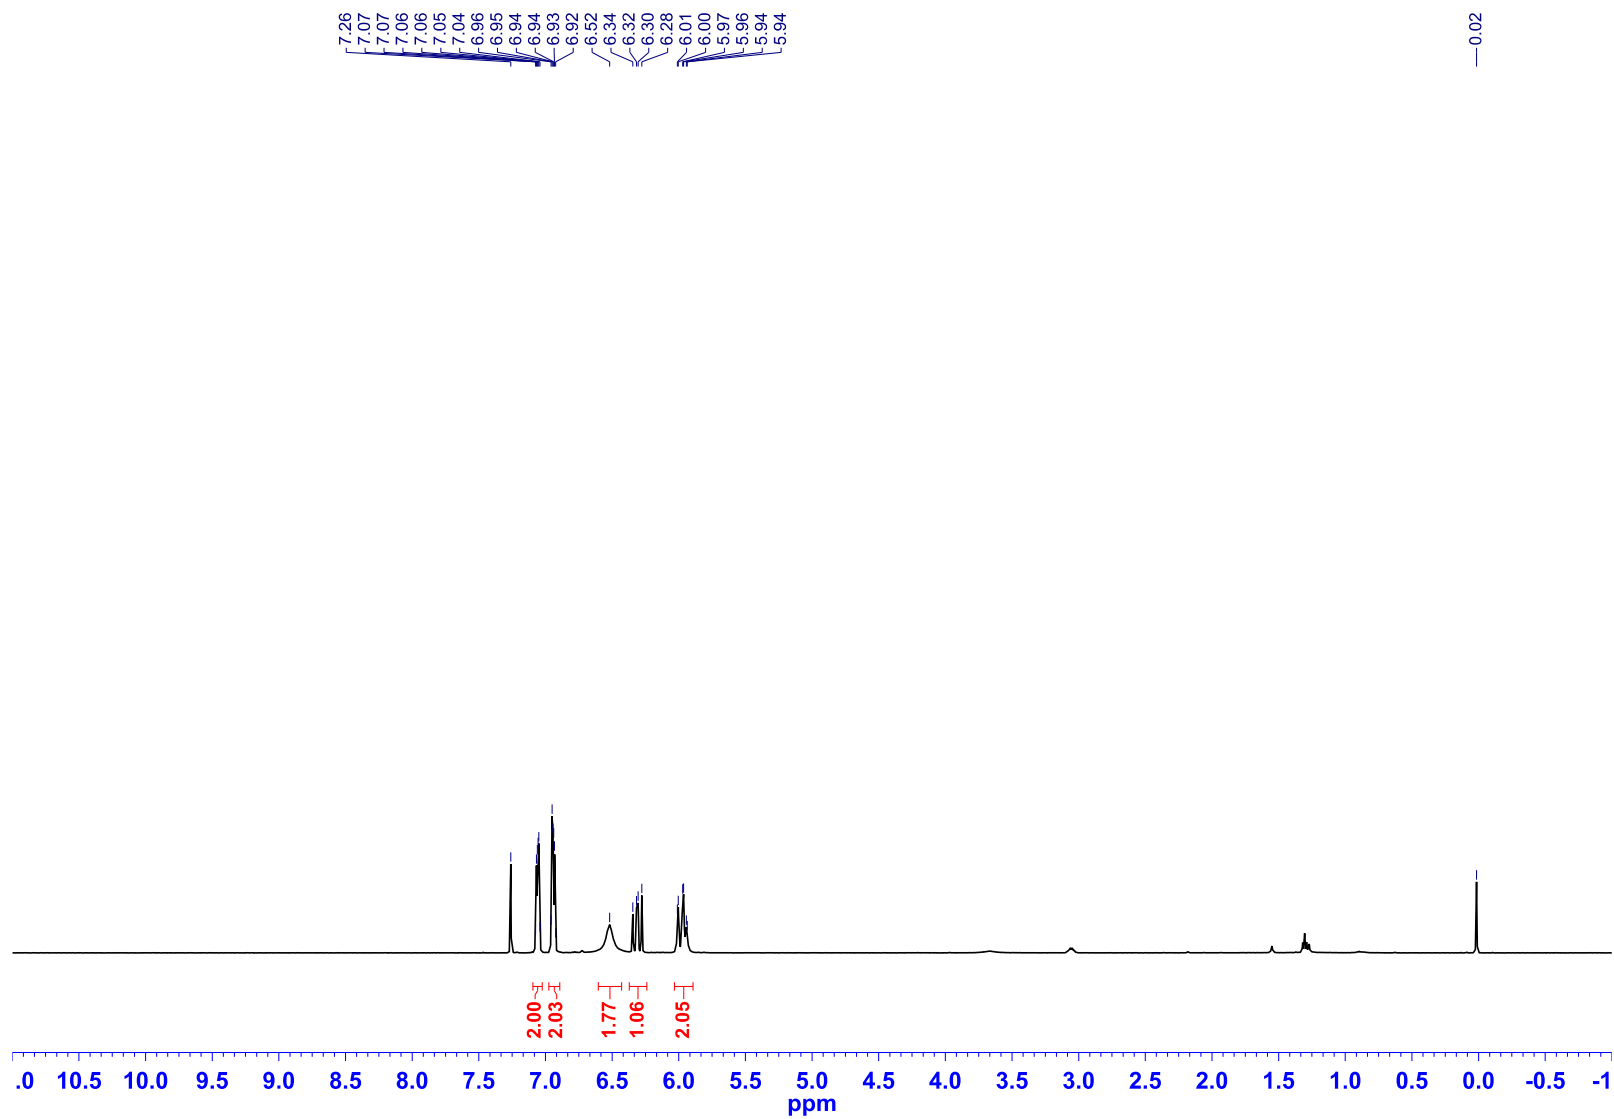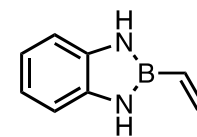

$^{13}\text{C}$  NMR (125.8 MHz,  $\text{CDCl}_3$ ) of 2-vinyl-2,3-dihydro-1*H*-1,3,2-benzodiazaborole (**6c**)

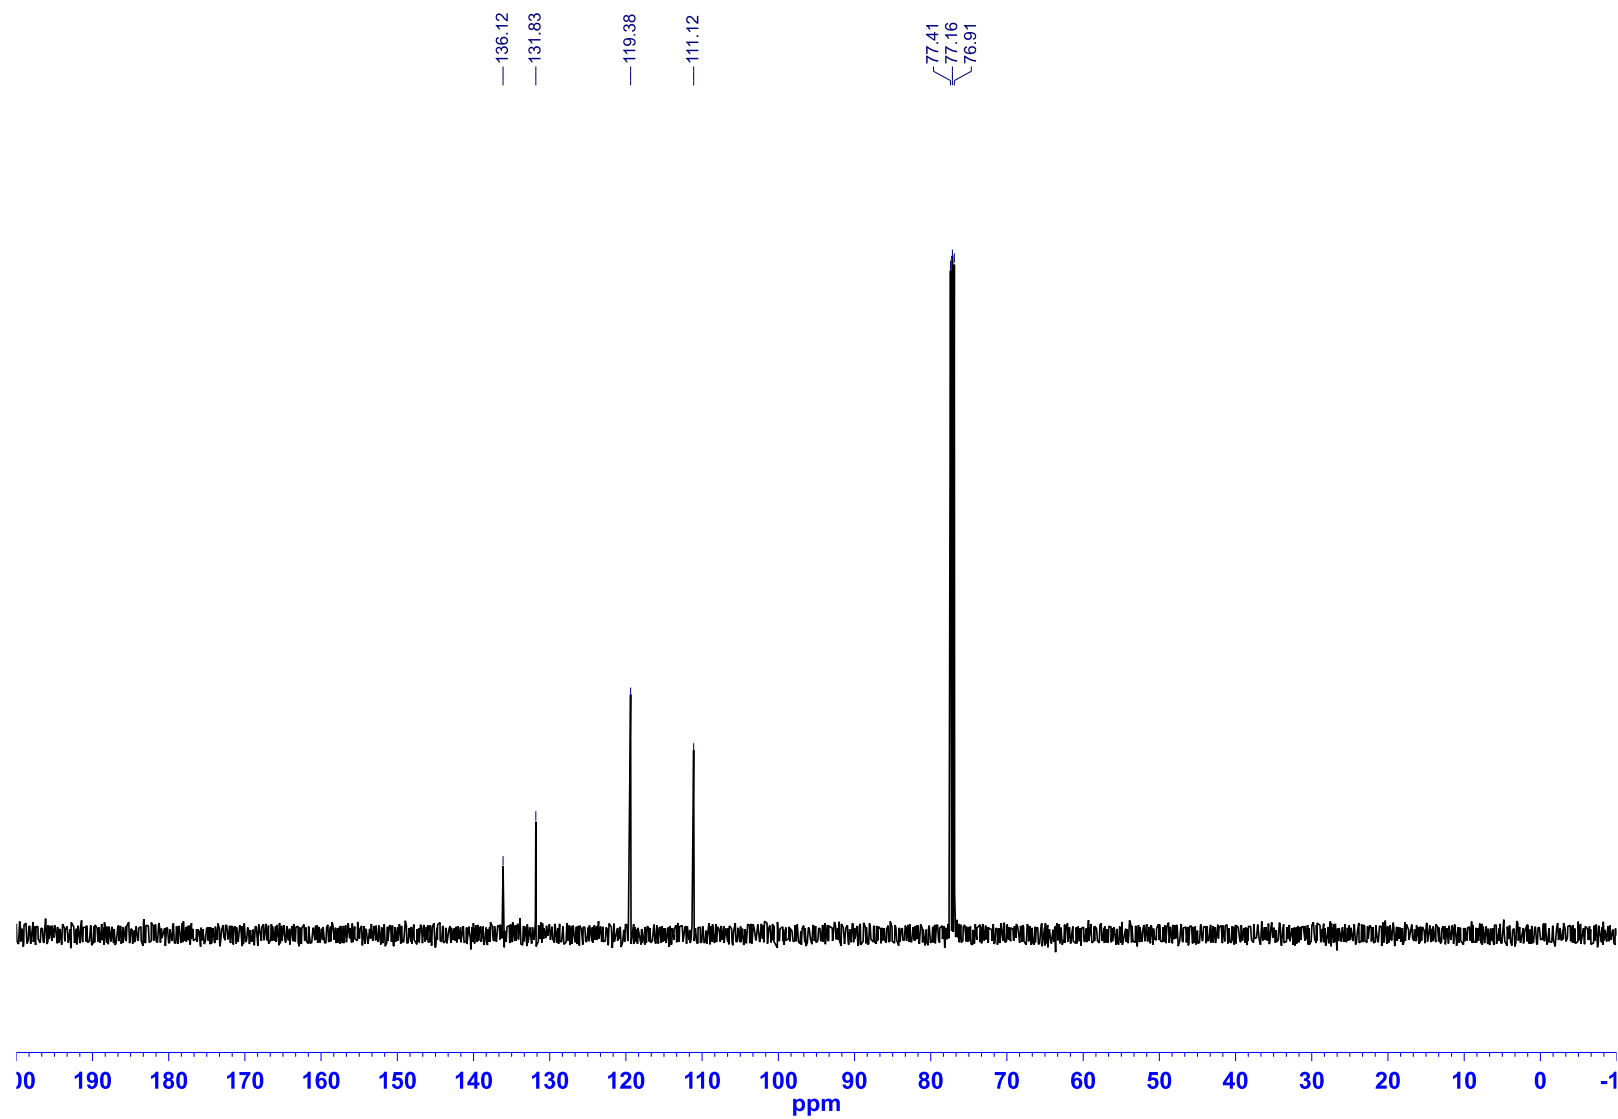



$^{11}\text{B}$  NMR (128.4 MHz, MeCN) of 2-vinyl-2,3-dihydro-1*H*-1,3,2-benzodiazaborole (**6c**)

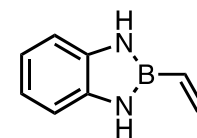

-27.47

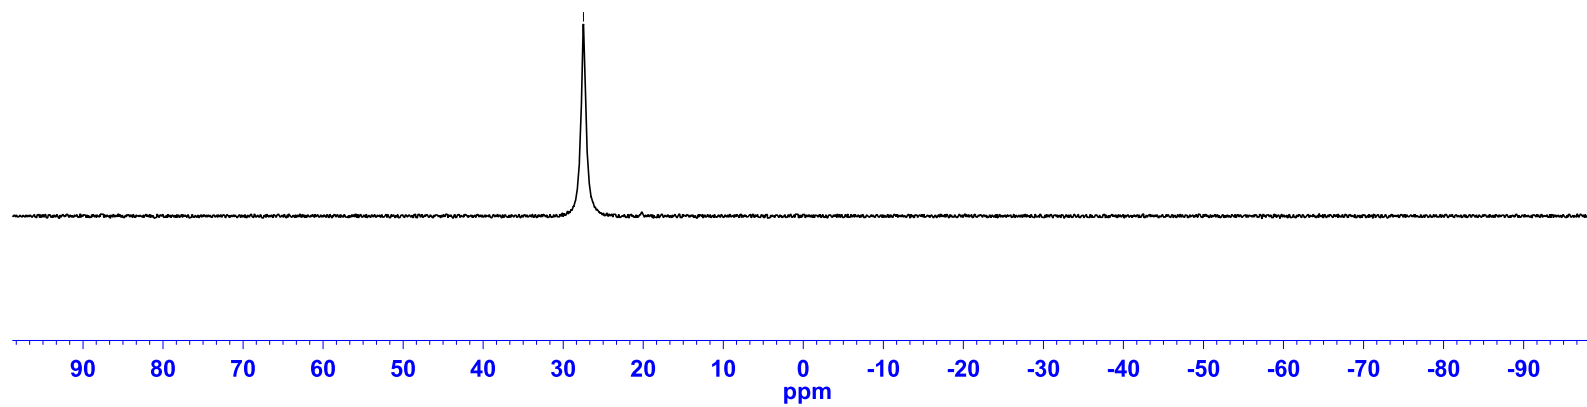

$^1\text{H}$  NMR (500.4 MHz,  $\text{CDCl}_3$ ) of 2-(1-propynyl)-2,3-dihydro-1*H*-1,3,2-benzodiazaborole (**6d**)

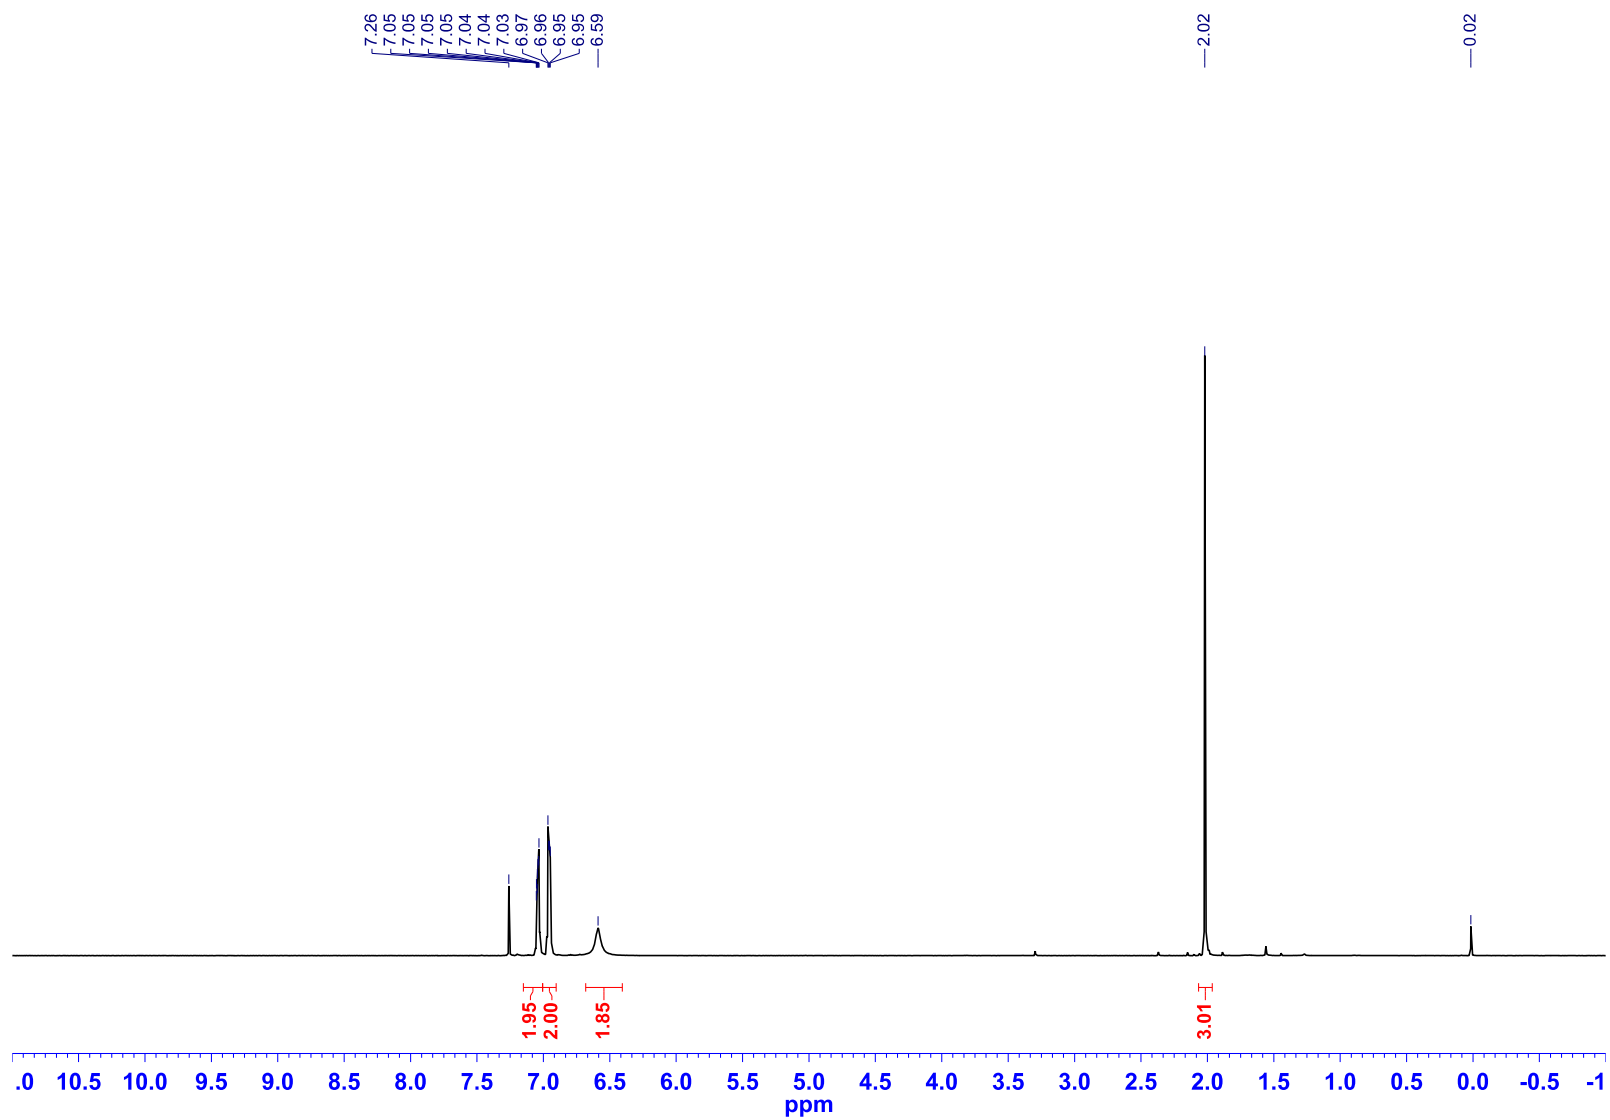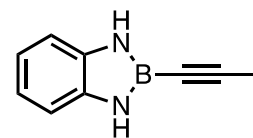

$^{13}\text{C}$  NMR (125.8 MHz,  $\text{CDCl}_3$ ) of 2-(1-propynyl)-2,3-dihydro-1*H*-1,3,2-benzodiazaborole (**6d**)

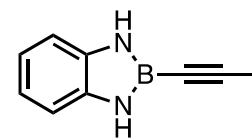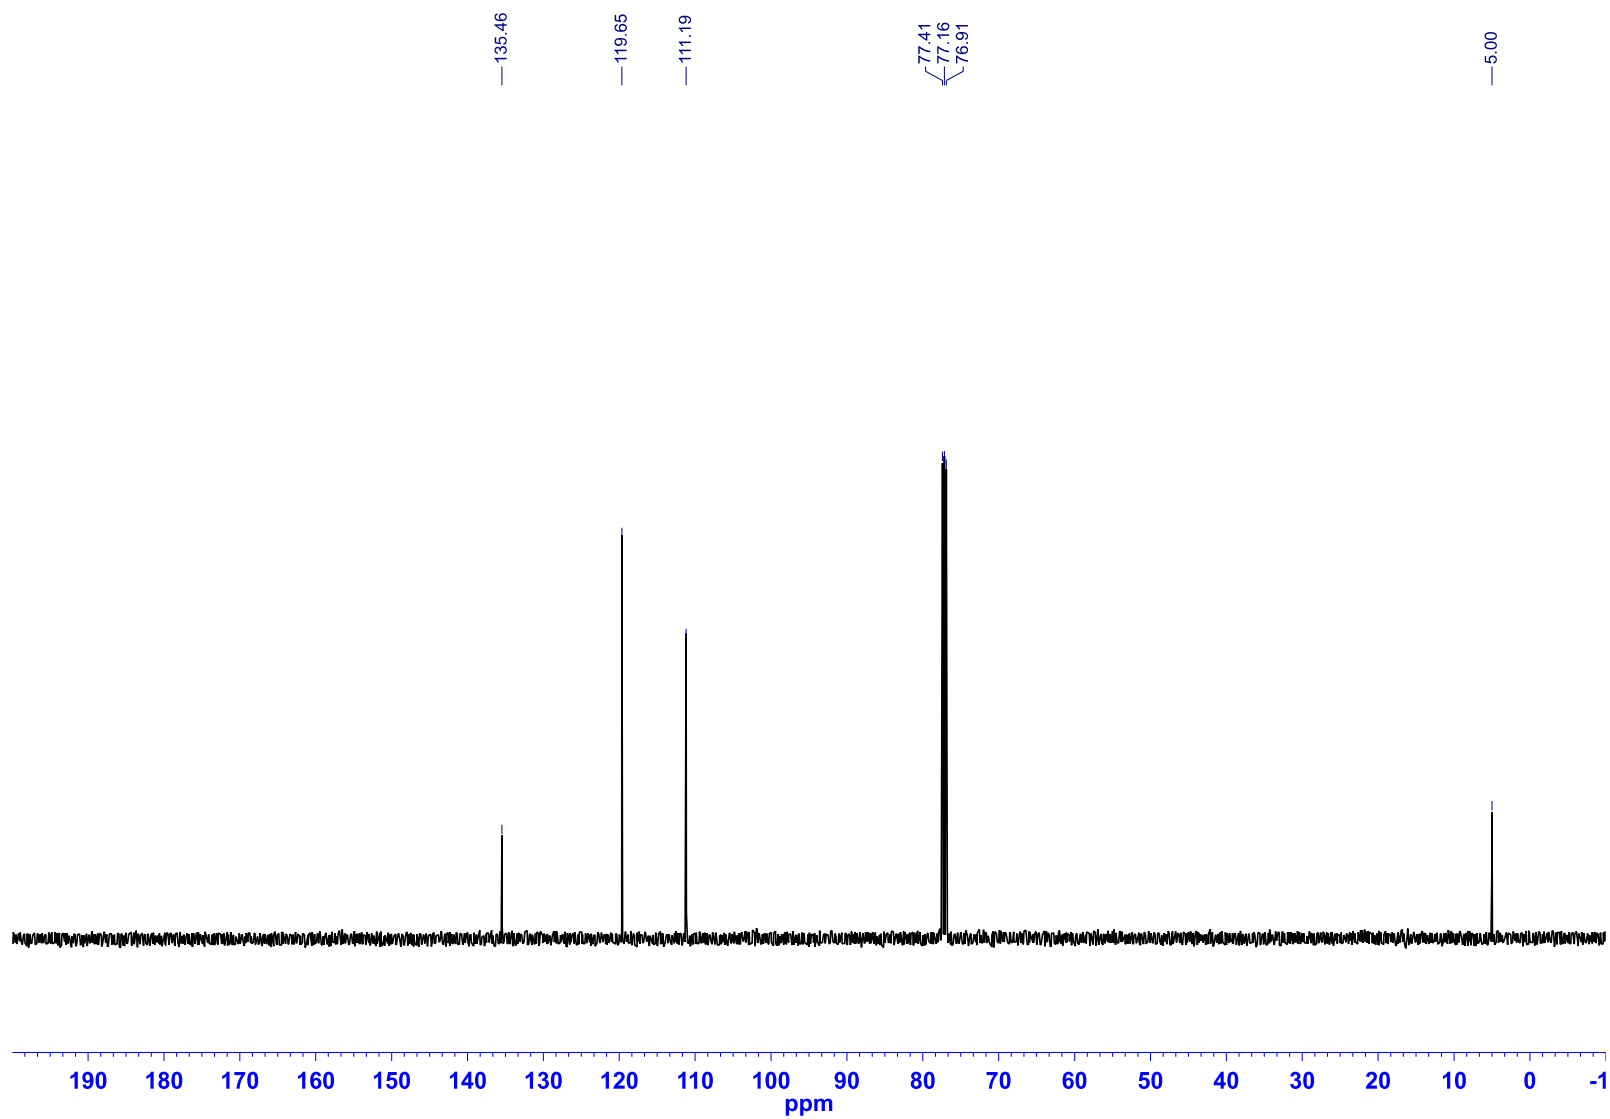

$^{11}\text{B}$  NMR (128.4 MHz, MeCN) of 2-(1-propynyl)-2,3-dihydro-1*H*-1,3,2-benzodiazaborole (**6d**)

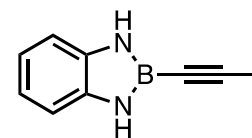

—20.19

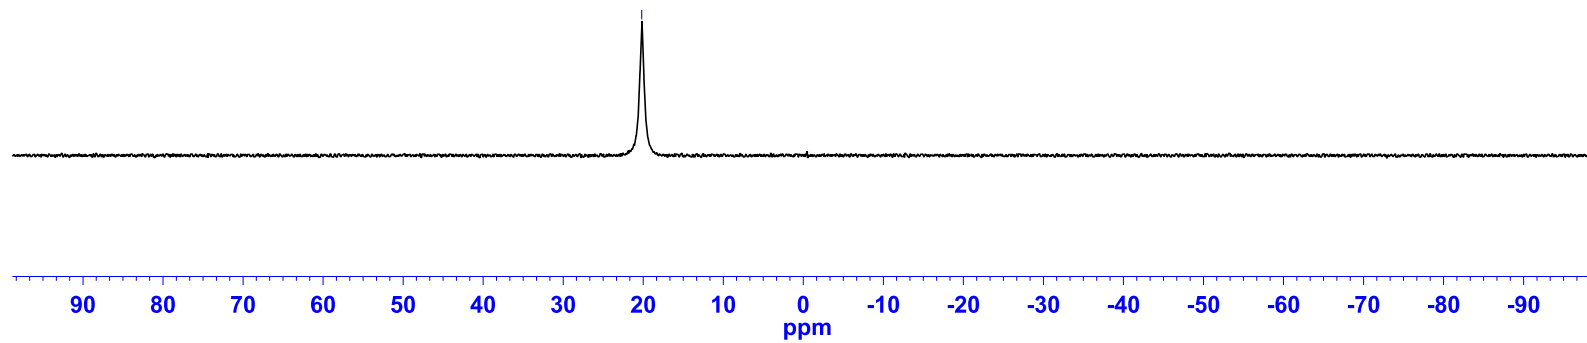

$^1\text{H}$  NMR (500.4 MHz,  $\text{CDCl}_3$ ) of 1-methyl-2-vinyl-2,3-dihydro-1*H*-1,3,2-benzodiazaborole (**6e**)

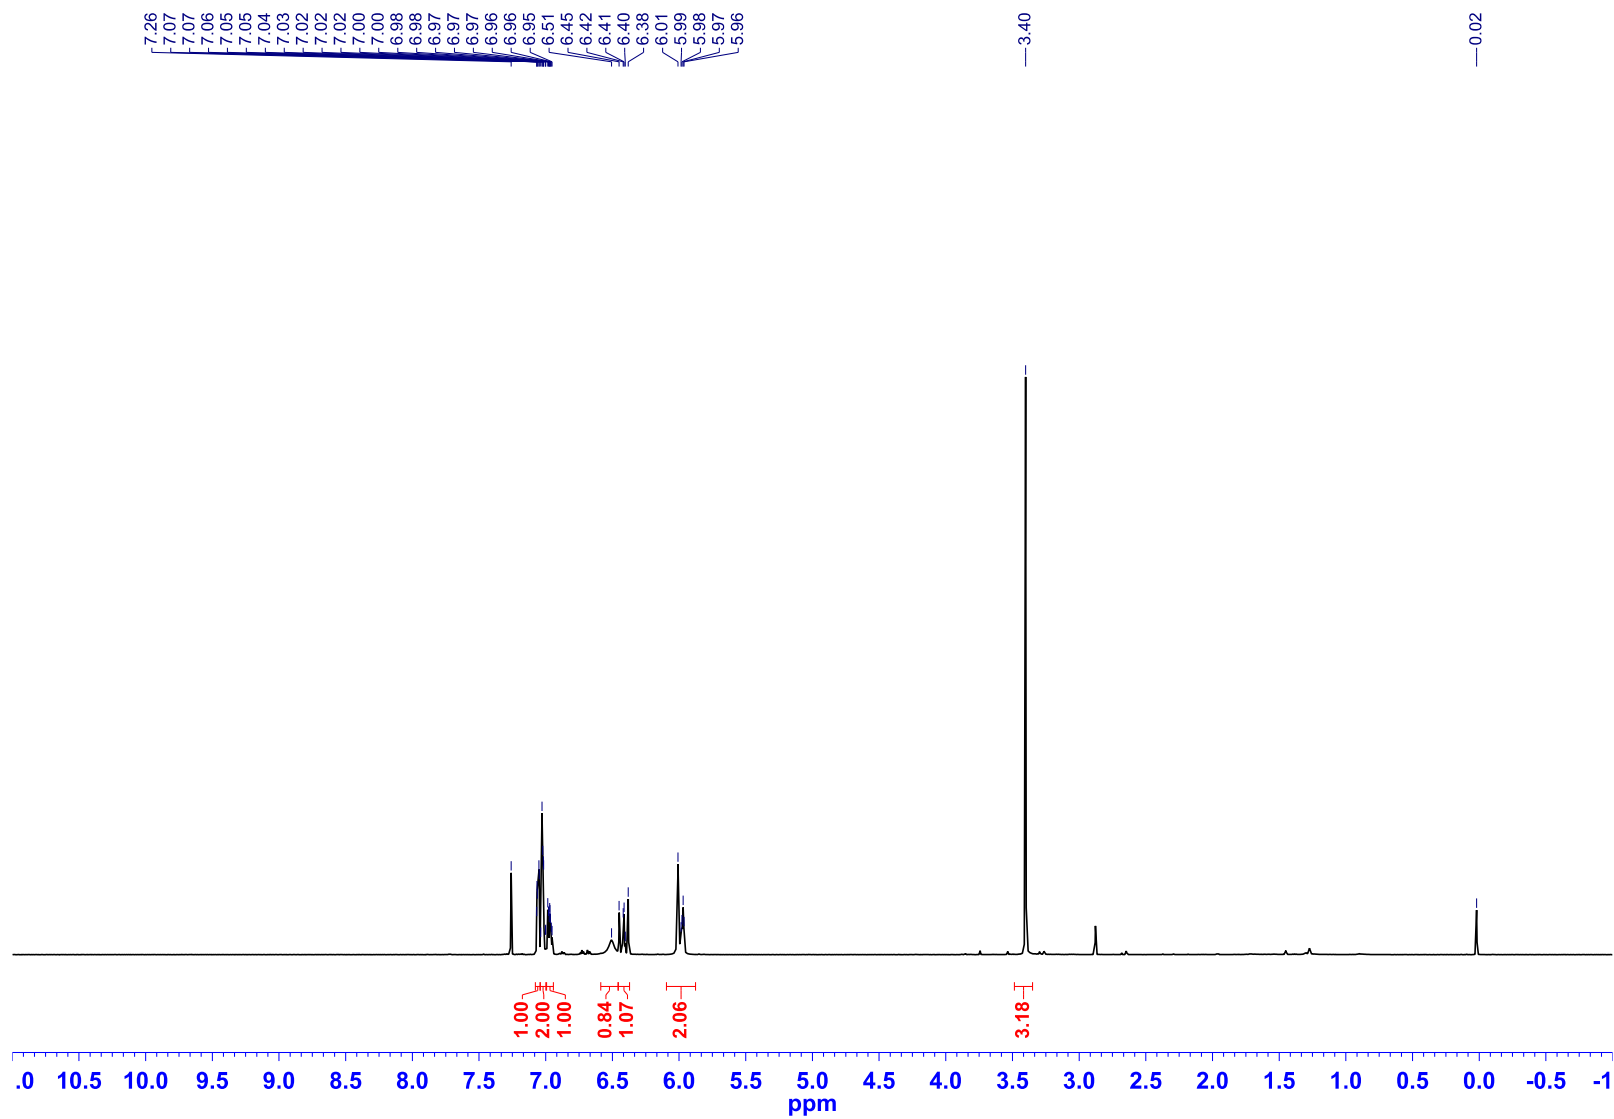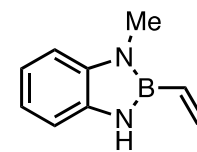

$^{13}\text{C}$  NMR (125.8 MHz,  $\text{CDCl}_3$ ) of 1-methyl-2-vinyl-2,3-dihydro-1*H*-1,3,2-benzodiazaborole (**6e**)

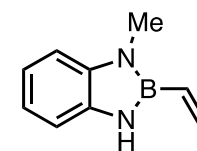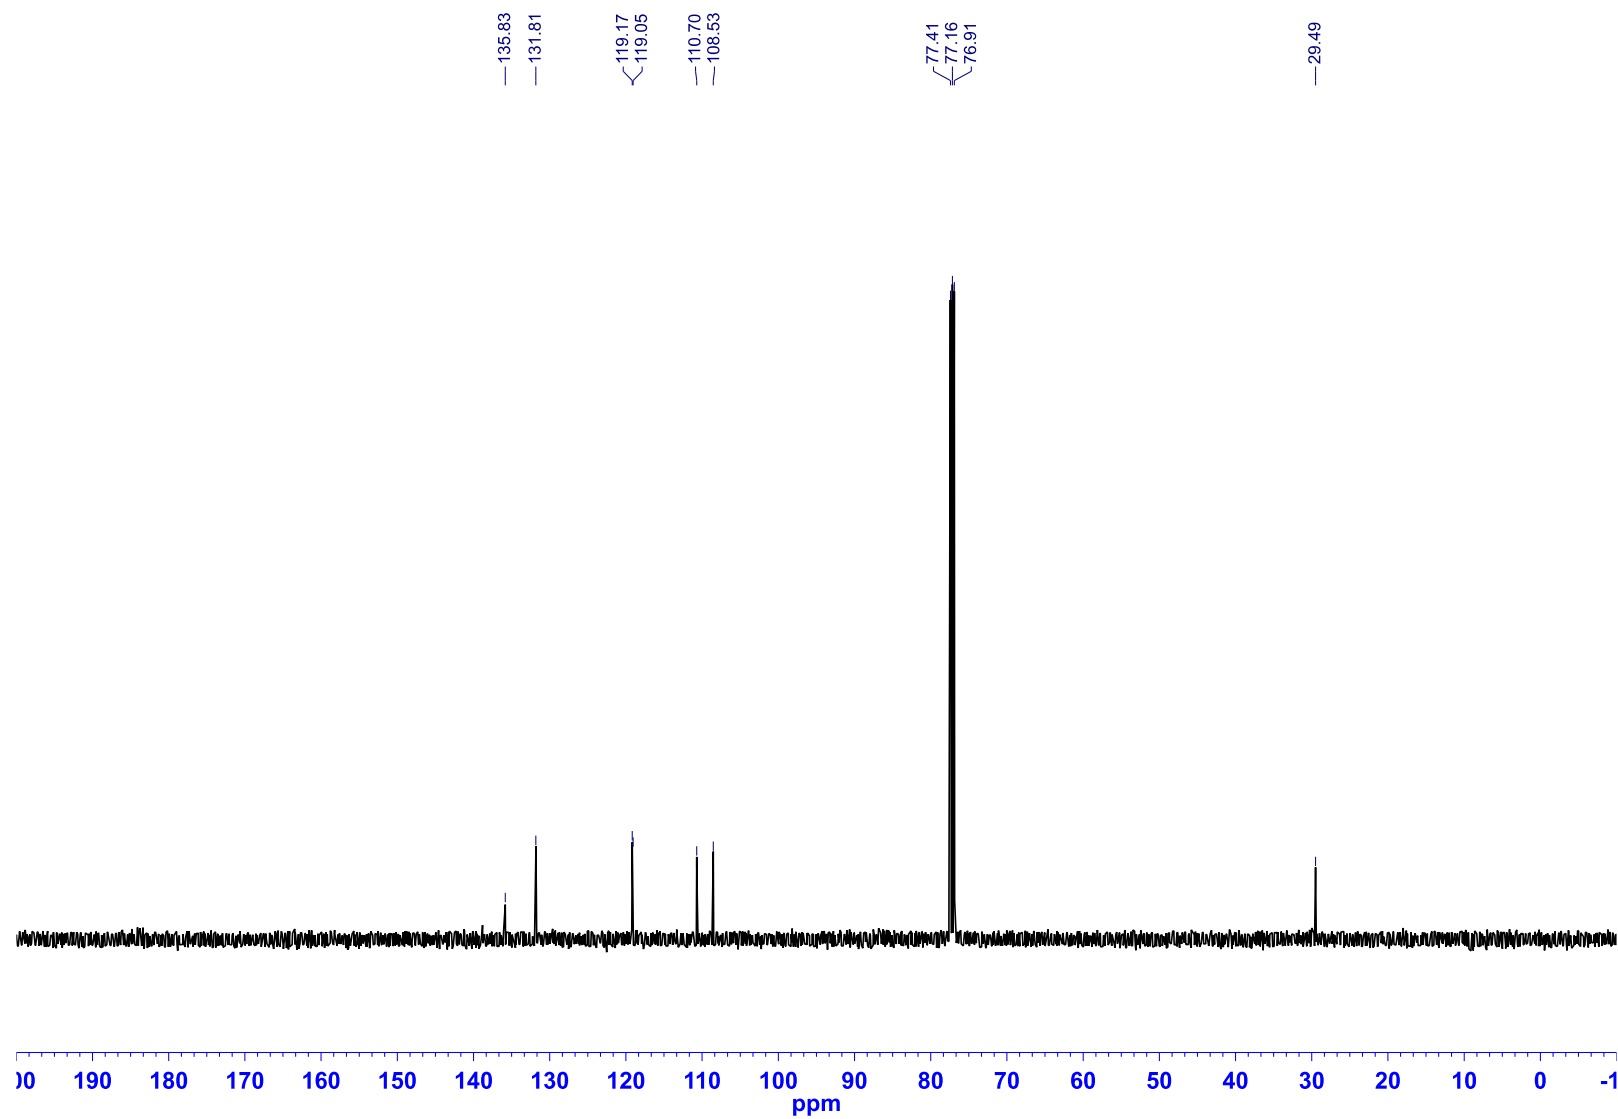

$^{11}\text{B}$  NMR (128.4 MHz, MeCN) of 1-methyl-2-vinyl-2,3-dihydro-1*H*-1,3,2-benzodiazaborole (**6e**)

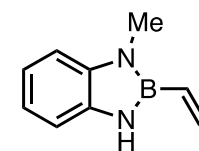

-27.47

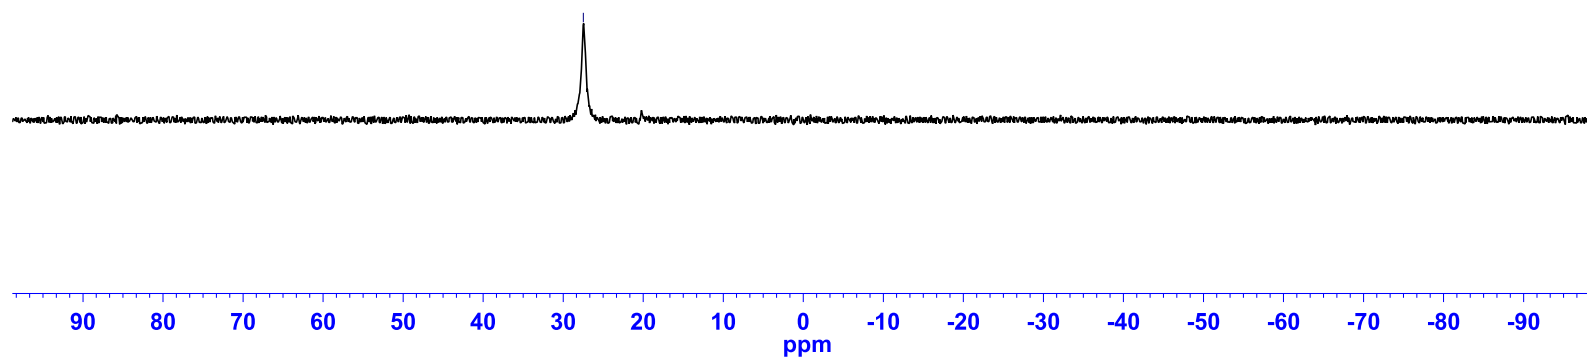

<sup>1</sup>H NMR (500.4 MHz, CDCl<sub>3</sub>) of (*E*)-1-methyl-2-(1-propenyl)-2,3-dihydro-1*H*-1,3,2-benzodiazaborole (**6f**)

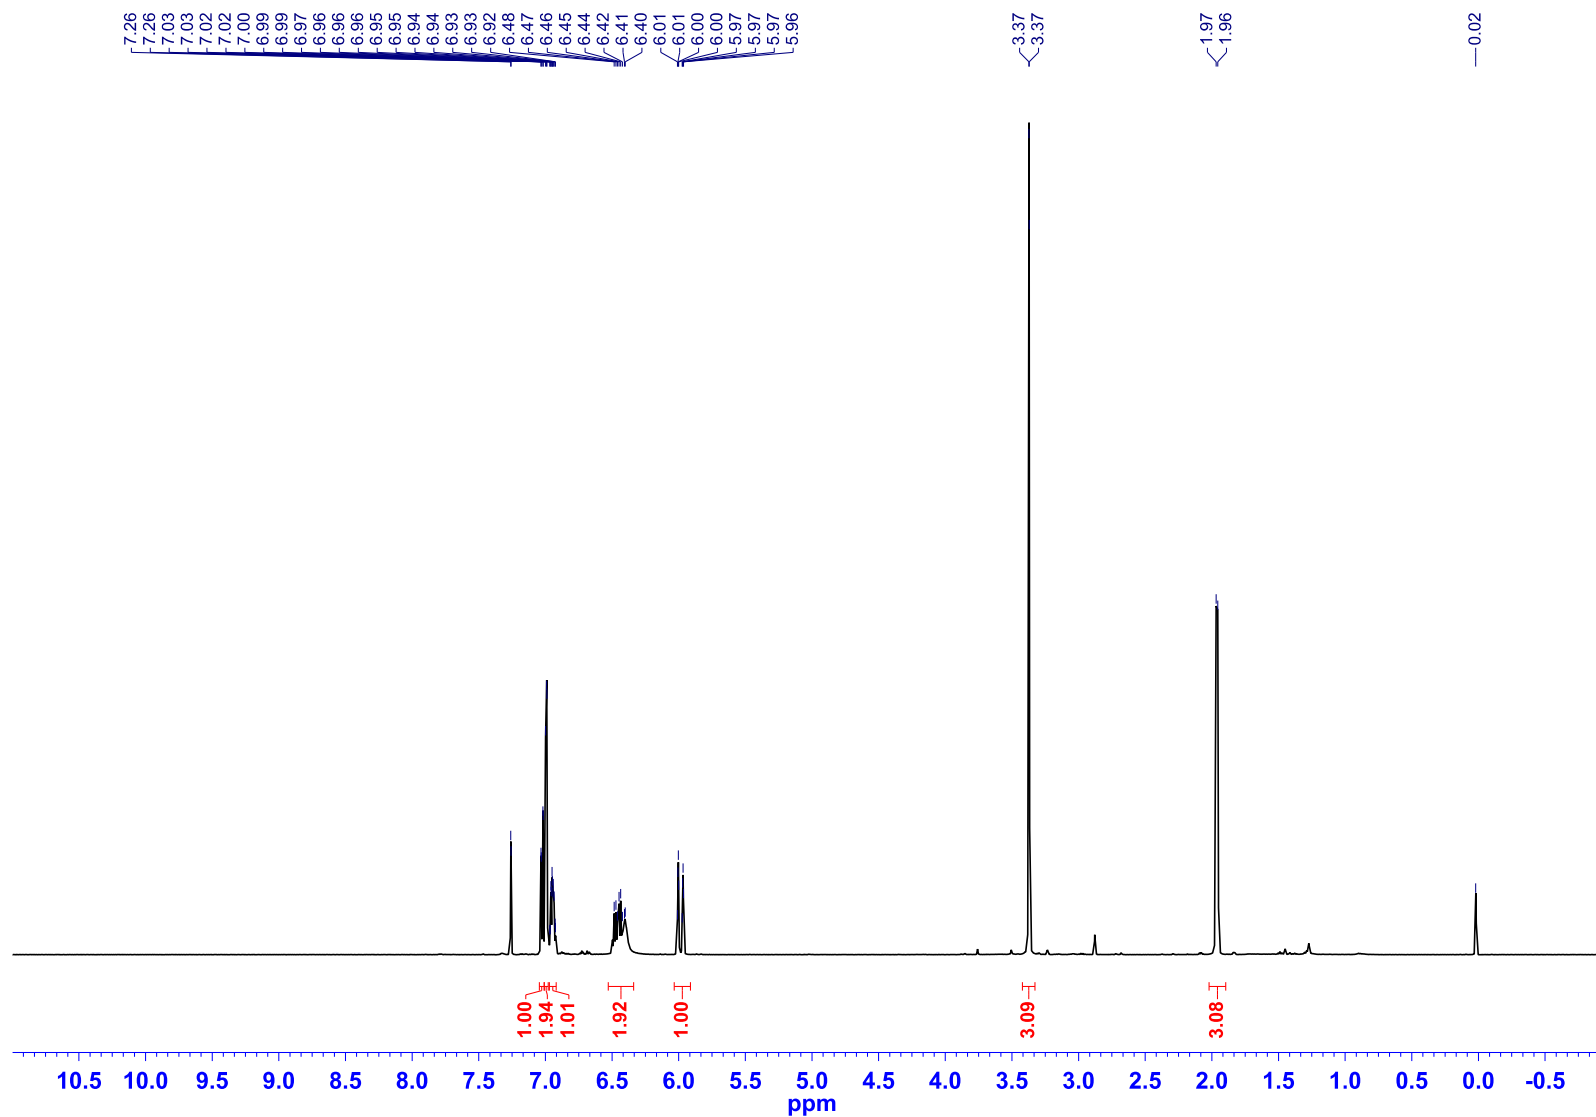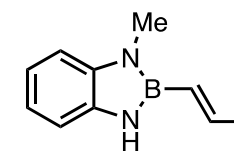



$^{13}\text{C}$  NMR (125.8 MHz,  $\text{CDCl}_3$ ) of (*E*)-1-methyl-2-(1-propenyl)-2,3-dihydro-1*H*-1,3,2-benzodiazaborole (**6f**)

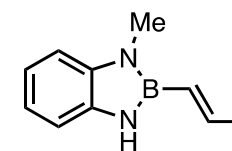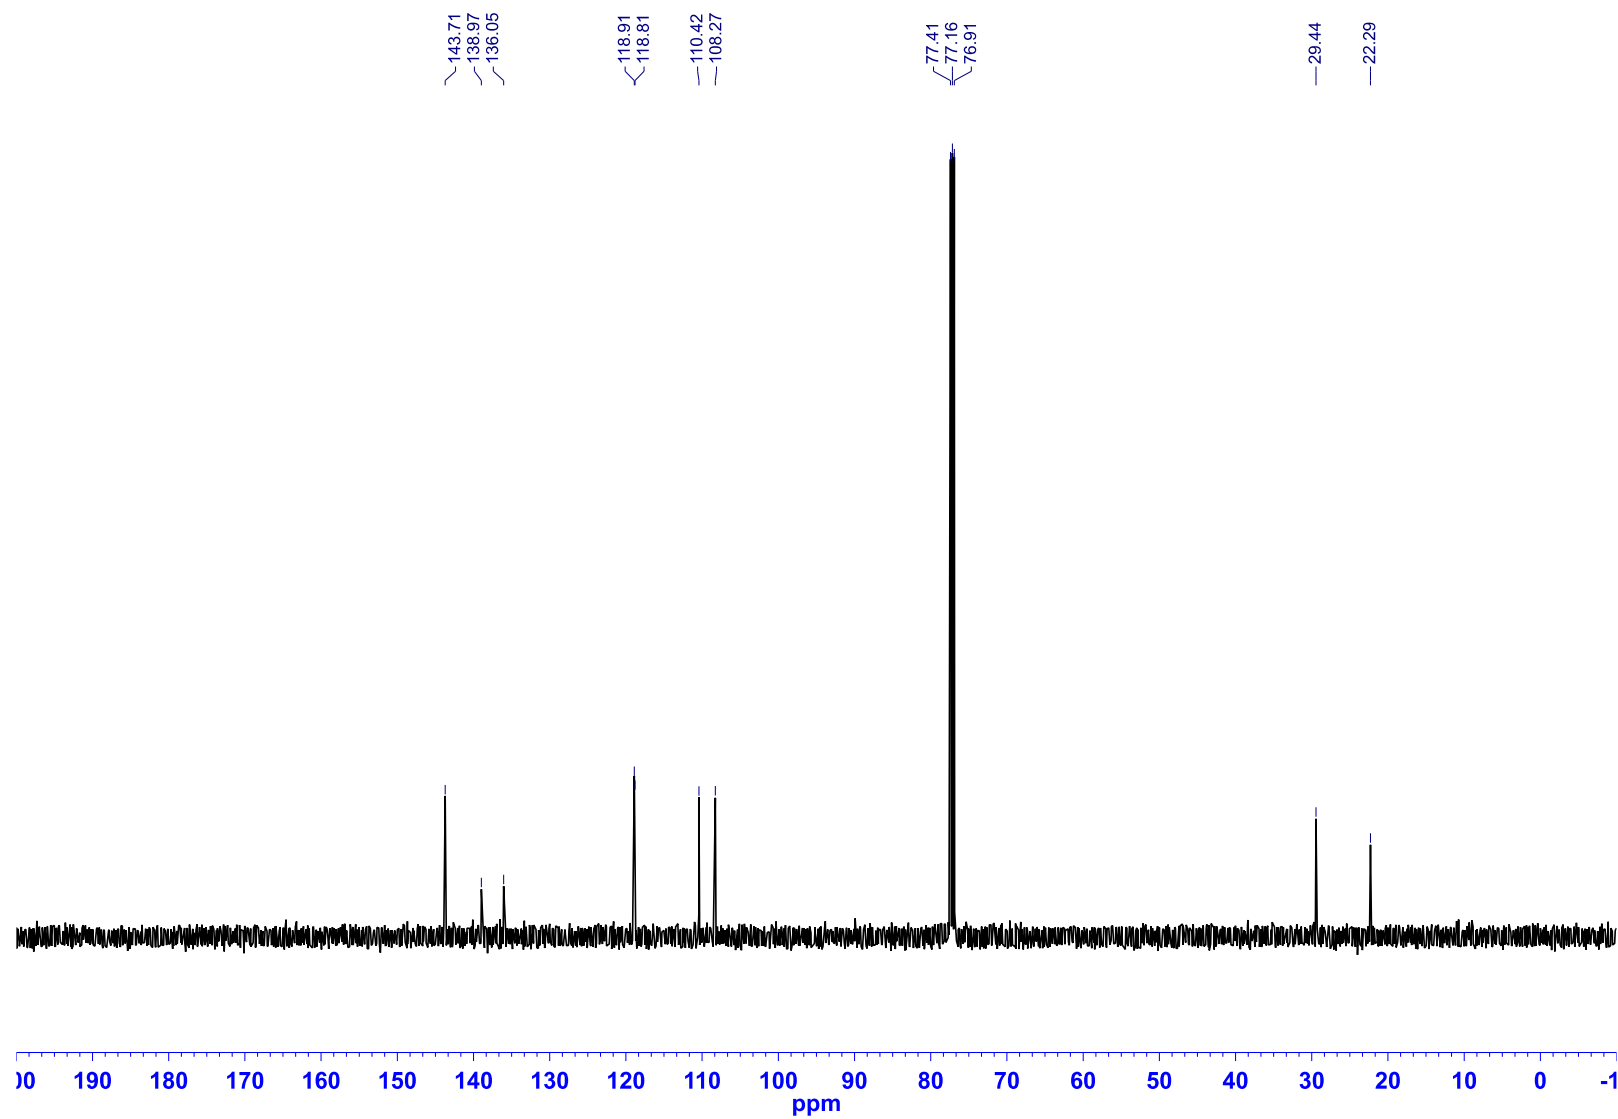

$^{11}\text{B}$  NMR (128.4 MHz, MeCN) of (*E*)-1-methyl-2-(1-propenyl)-2,3-dihydro-1*H*-1,3,2-benzodiazaborole (**6f**)

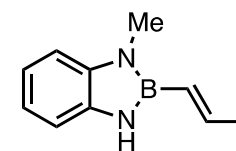

—27.52

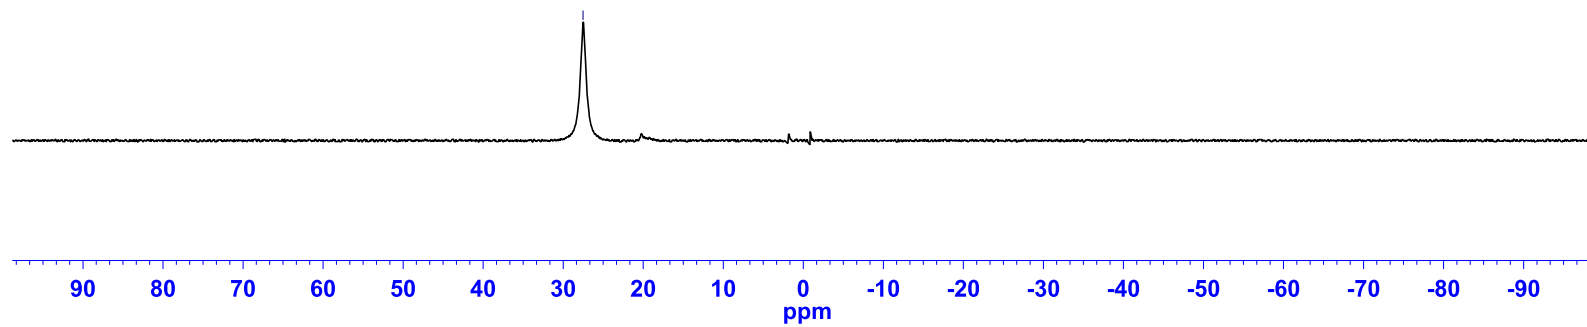

$^1\text{H}$  NMR (500.4 MHz,  $\text{CDCl}_3$ ) of 1-phenyl-2-vinyl-2,3-dihydro-1*H*-1,3,2-benzodiazaborole (**6g**)

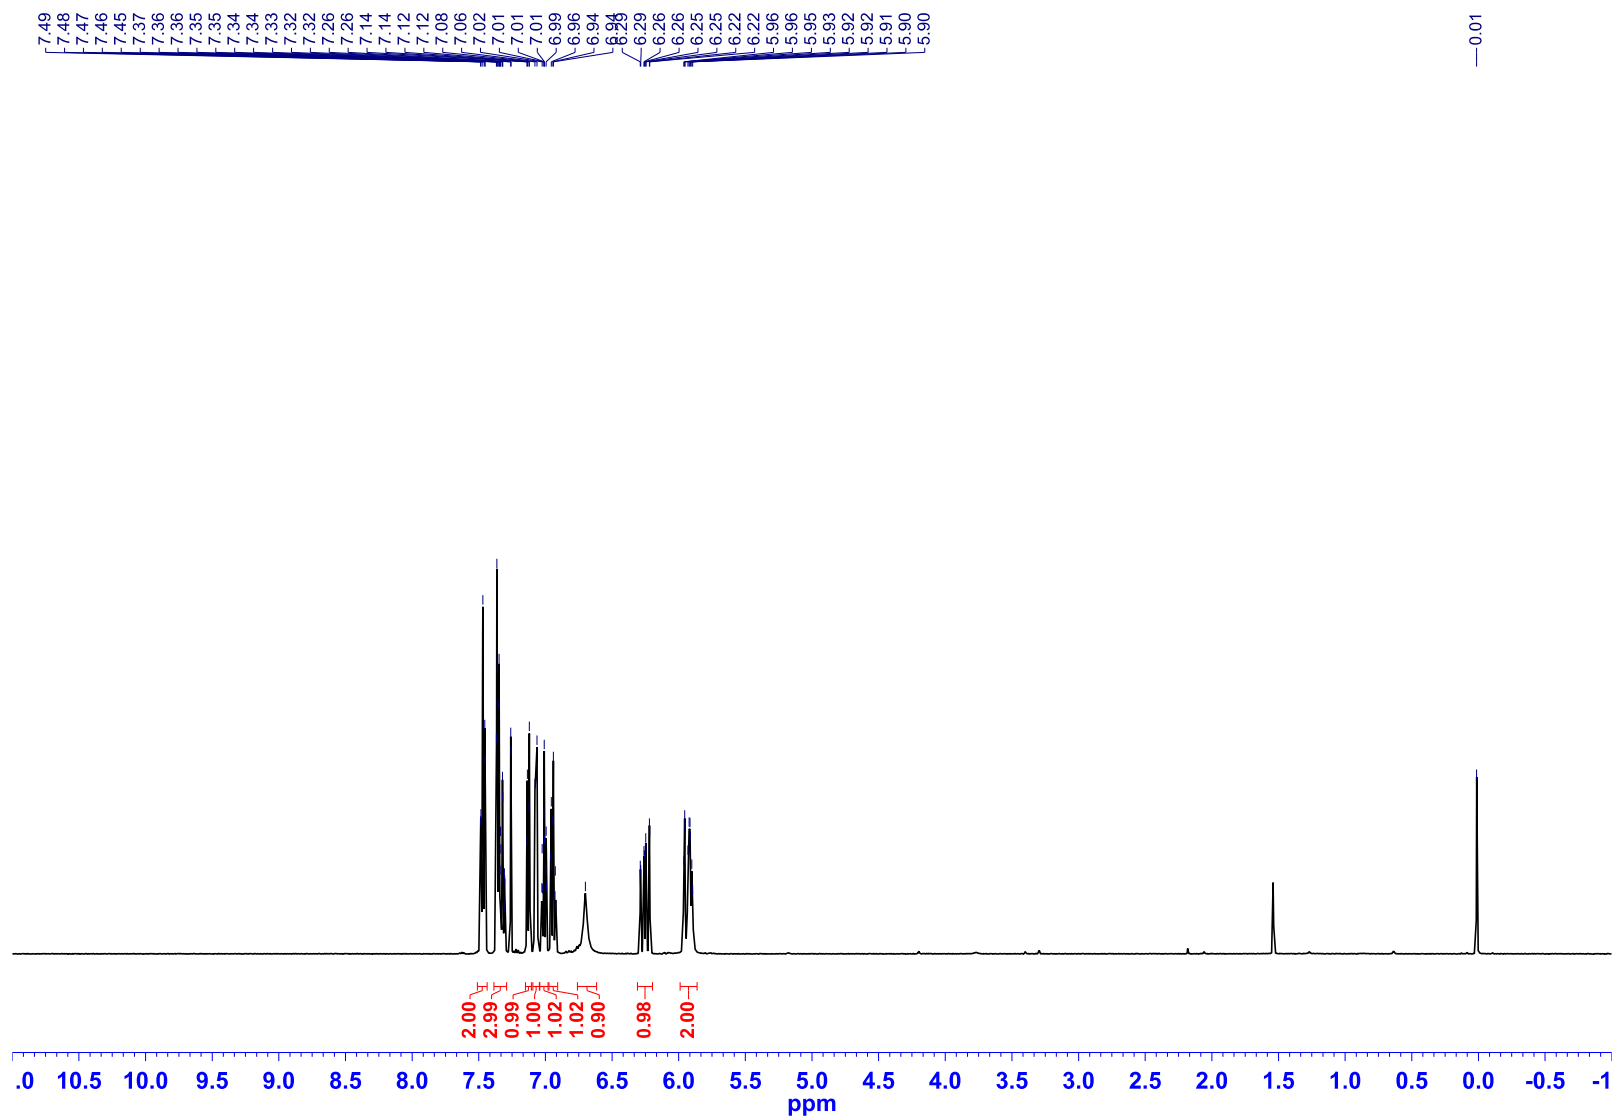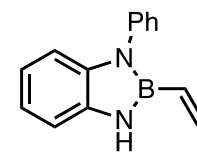

$^{13}\text{C}$  NMR (125.8 MHz,  $\text{CDCl}_3$ ) of 1-phenyl-2-vinyl-2,3-dihydro-1*H*-1,3,2-benzodiazaborole (**6g**)

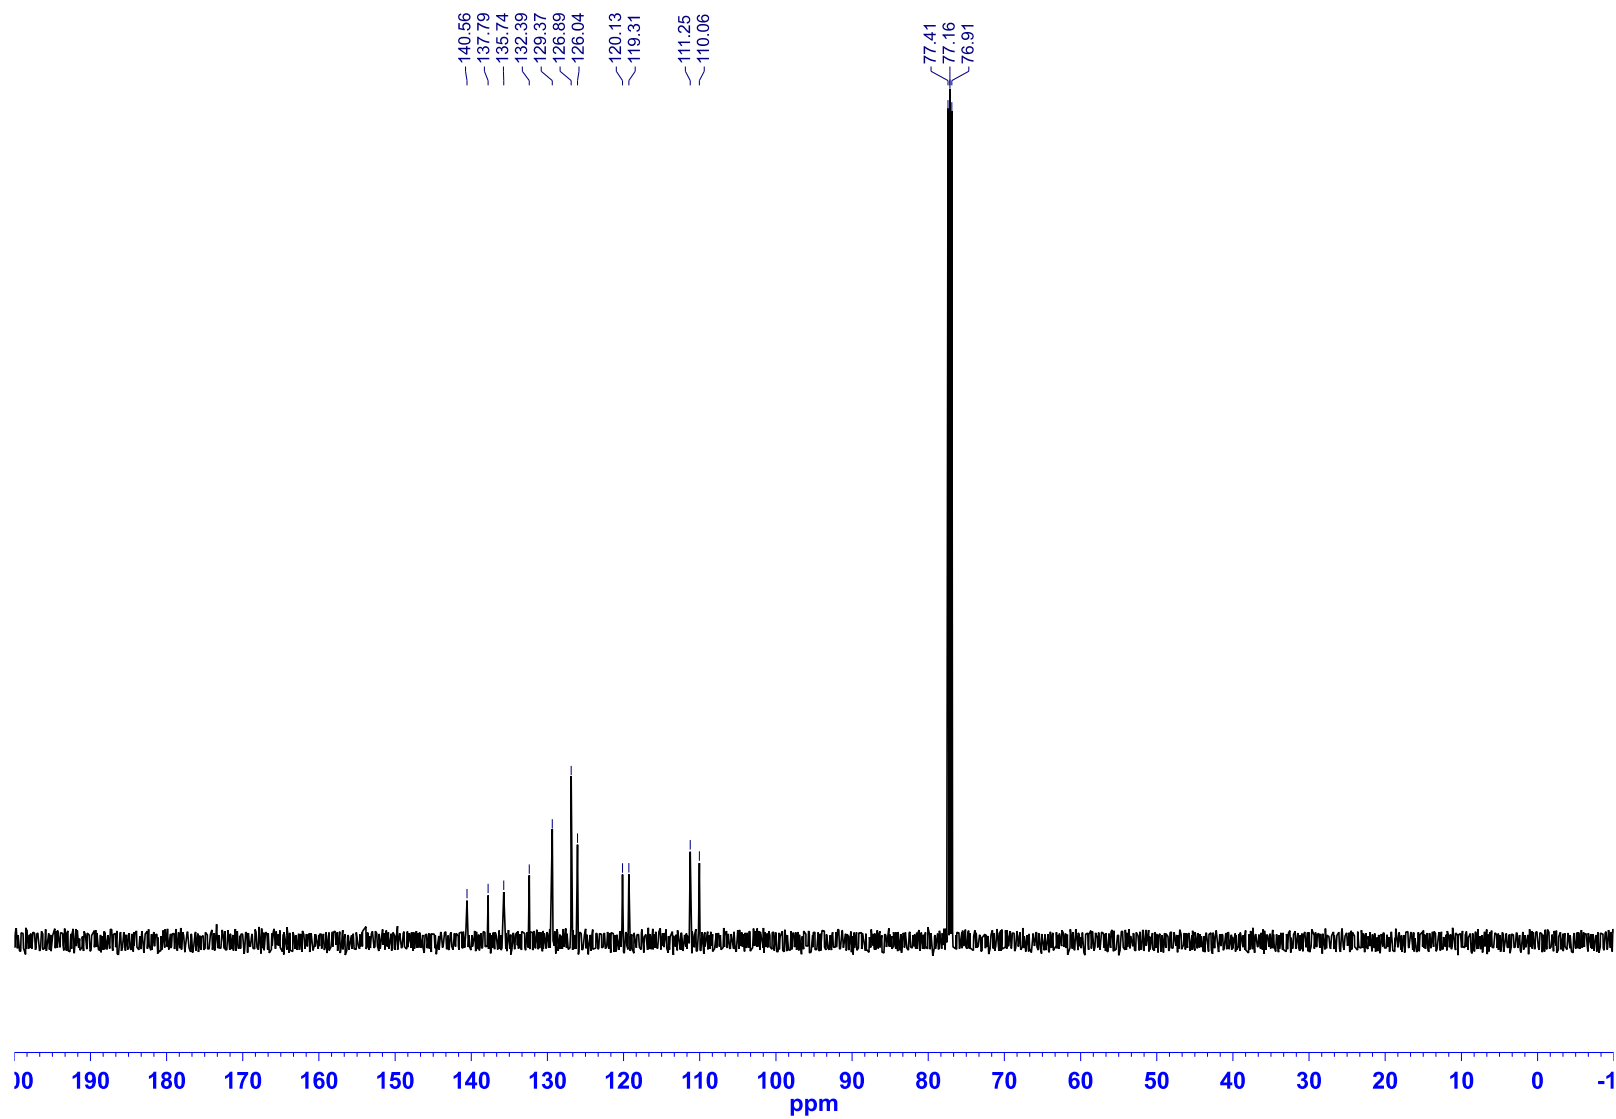

$^{11}\text{B}$  NMR (128.4 MHz, MeCN) of 1-phenyl-2-vinyl-2,3-dihydro-1*H*-1,3,2-benzodiazaborole (**6g**)

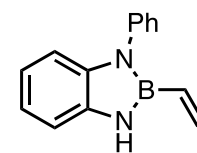

-27.46

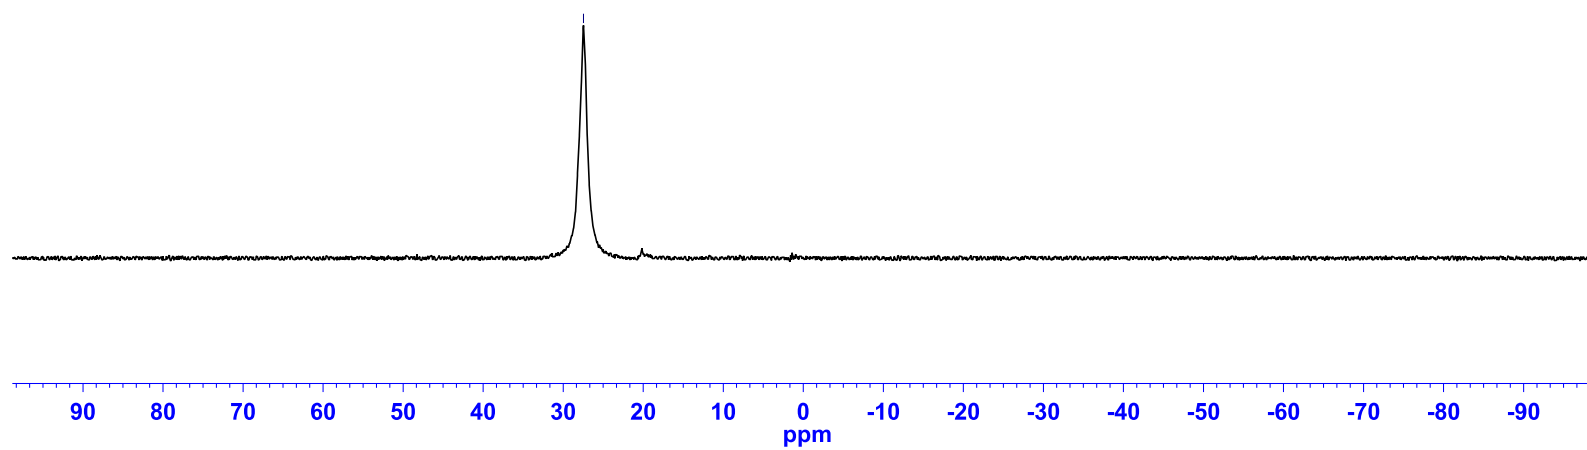

$^1\text{H}$  NMR (500.4 MHz,  $\text{CDCl}_3$ ) of (*E*)-1-phenyl-2-(1-propenyl)-2,3-dihydro-1*H*-1,3,2-benzodiazaborole (**6h**)

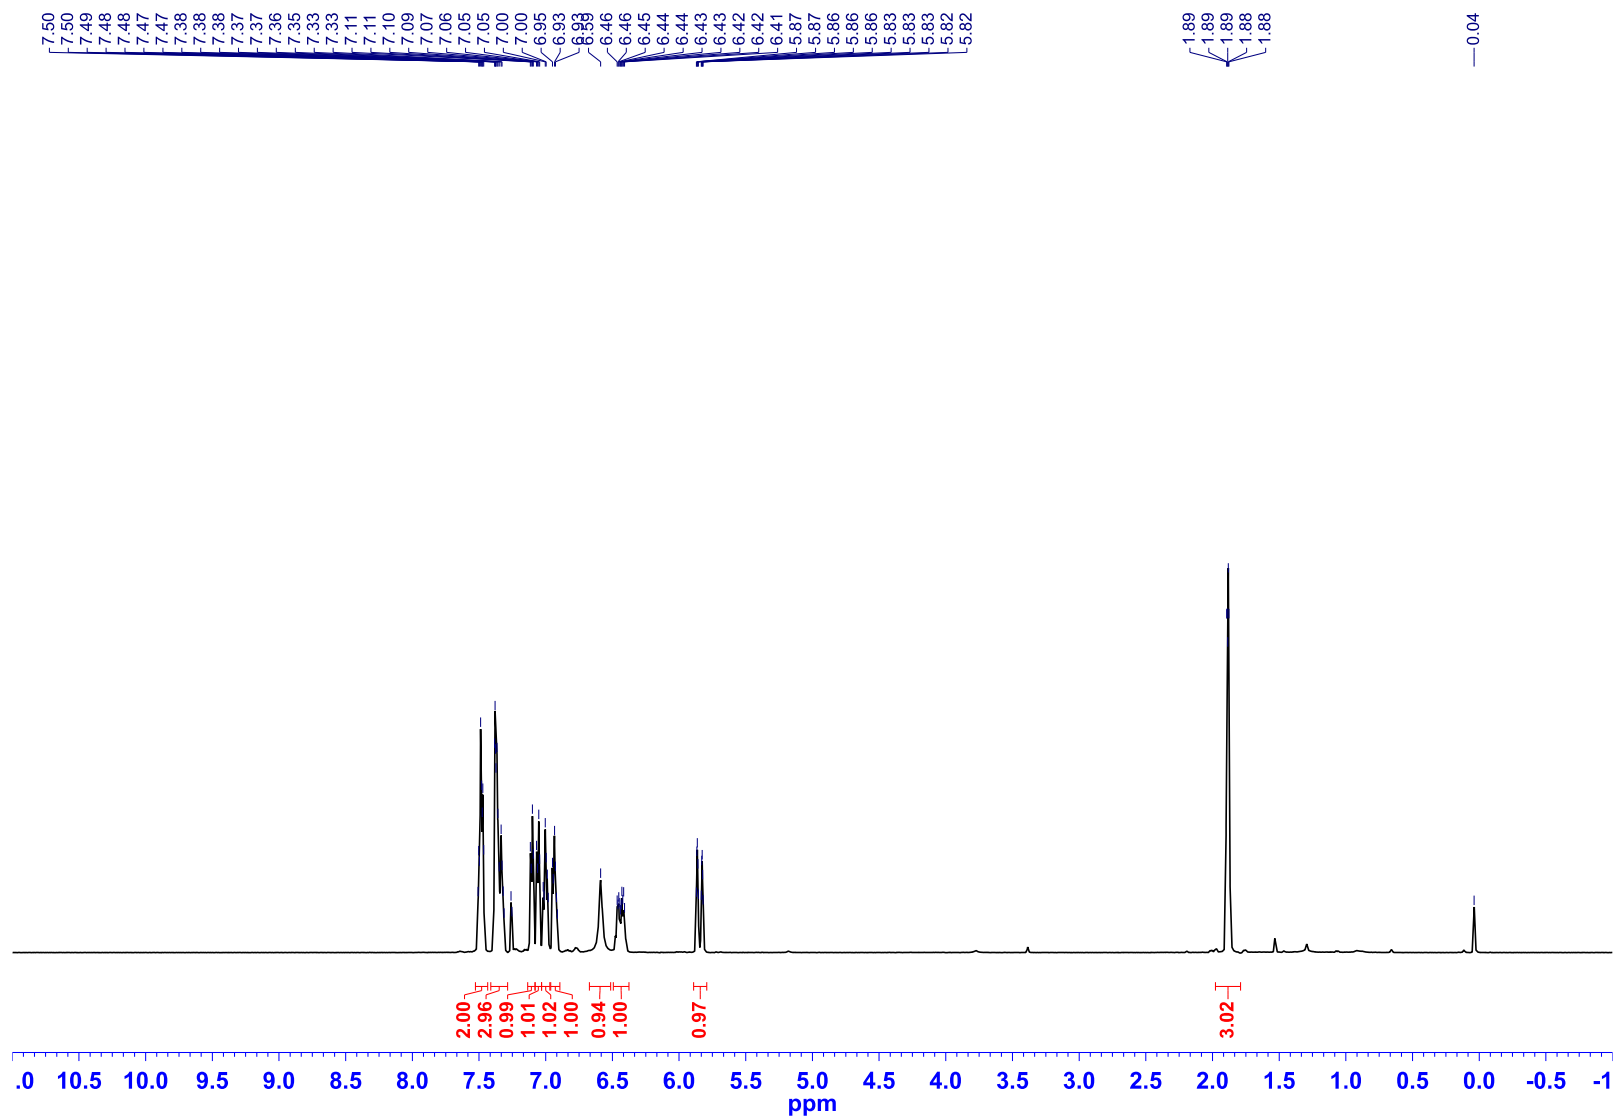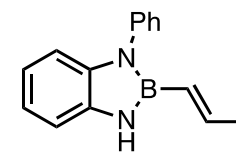

$^{13}\text{C}$  NMR (125.8 MHz,  $\text{CDCl}_3$ ) of (*E*)-1-phenyl-2-(1-propenyl)-2,3-dihydro-1*H*-1,3,2-benzodiazaborole (**6h**)

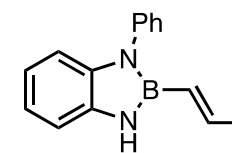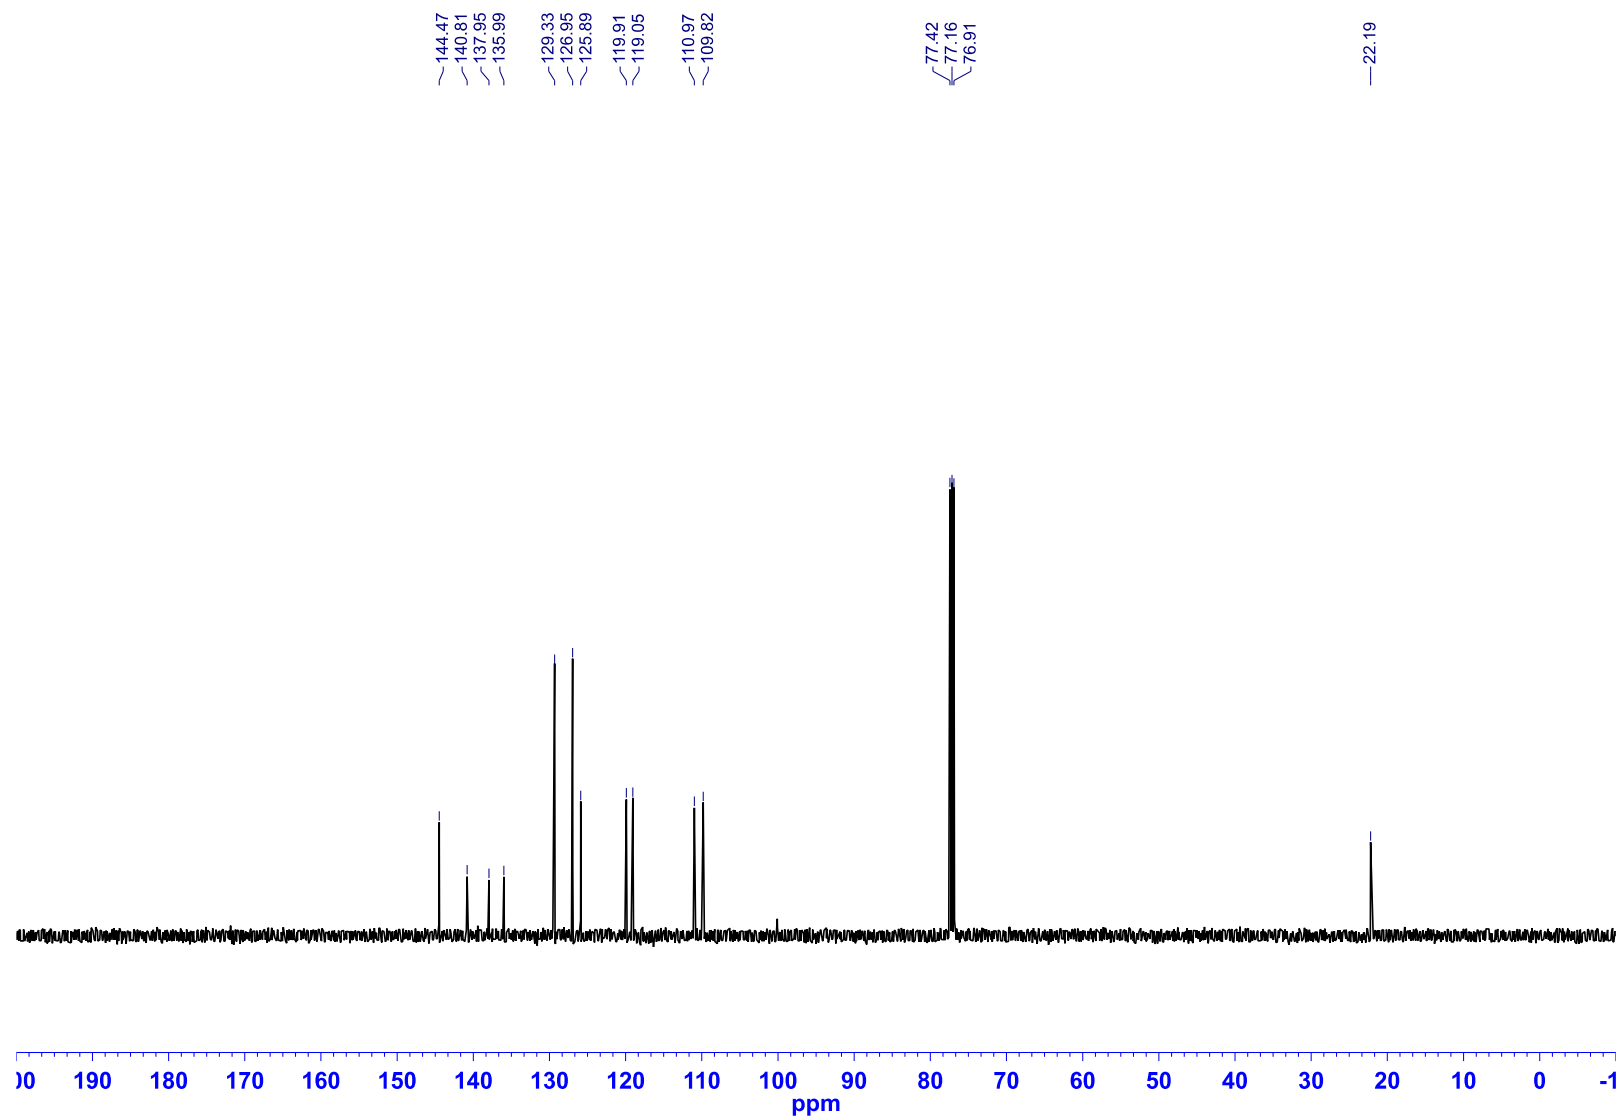

$^{11}\text{B}$  NMR (128.4 MHz,  $\text{CDCl}_3$ ) of (*E*)-1-phenyl-2-(1-propenyl)-2,3-dihydro-1*H*-1,3,2-benzodiazaborole (**6h**)

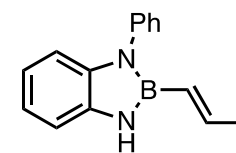

—26.86

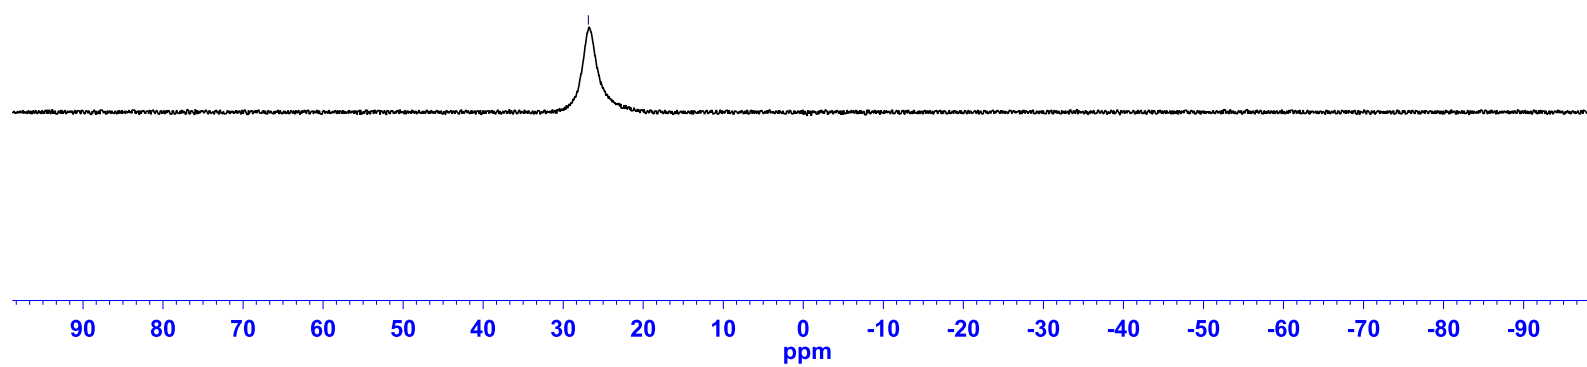



$^1\text{H}$  NMR (500.4 MHz,  $\text{CDCl}_3$ ) of 2-methyl-2,3-dihydro-1*H*-1,3,2-benzodiazaborole (**7a**)

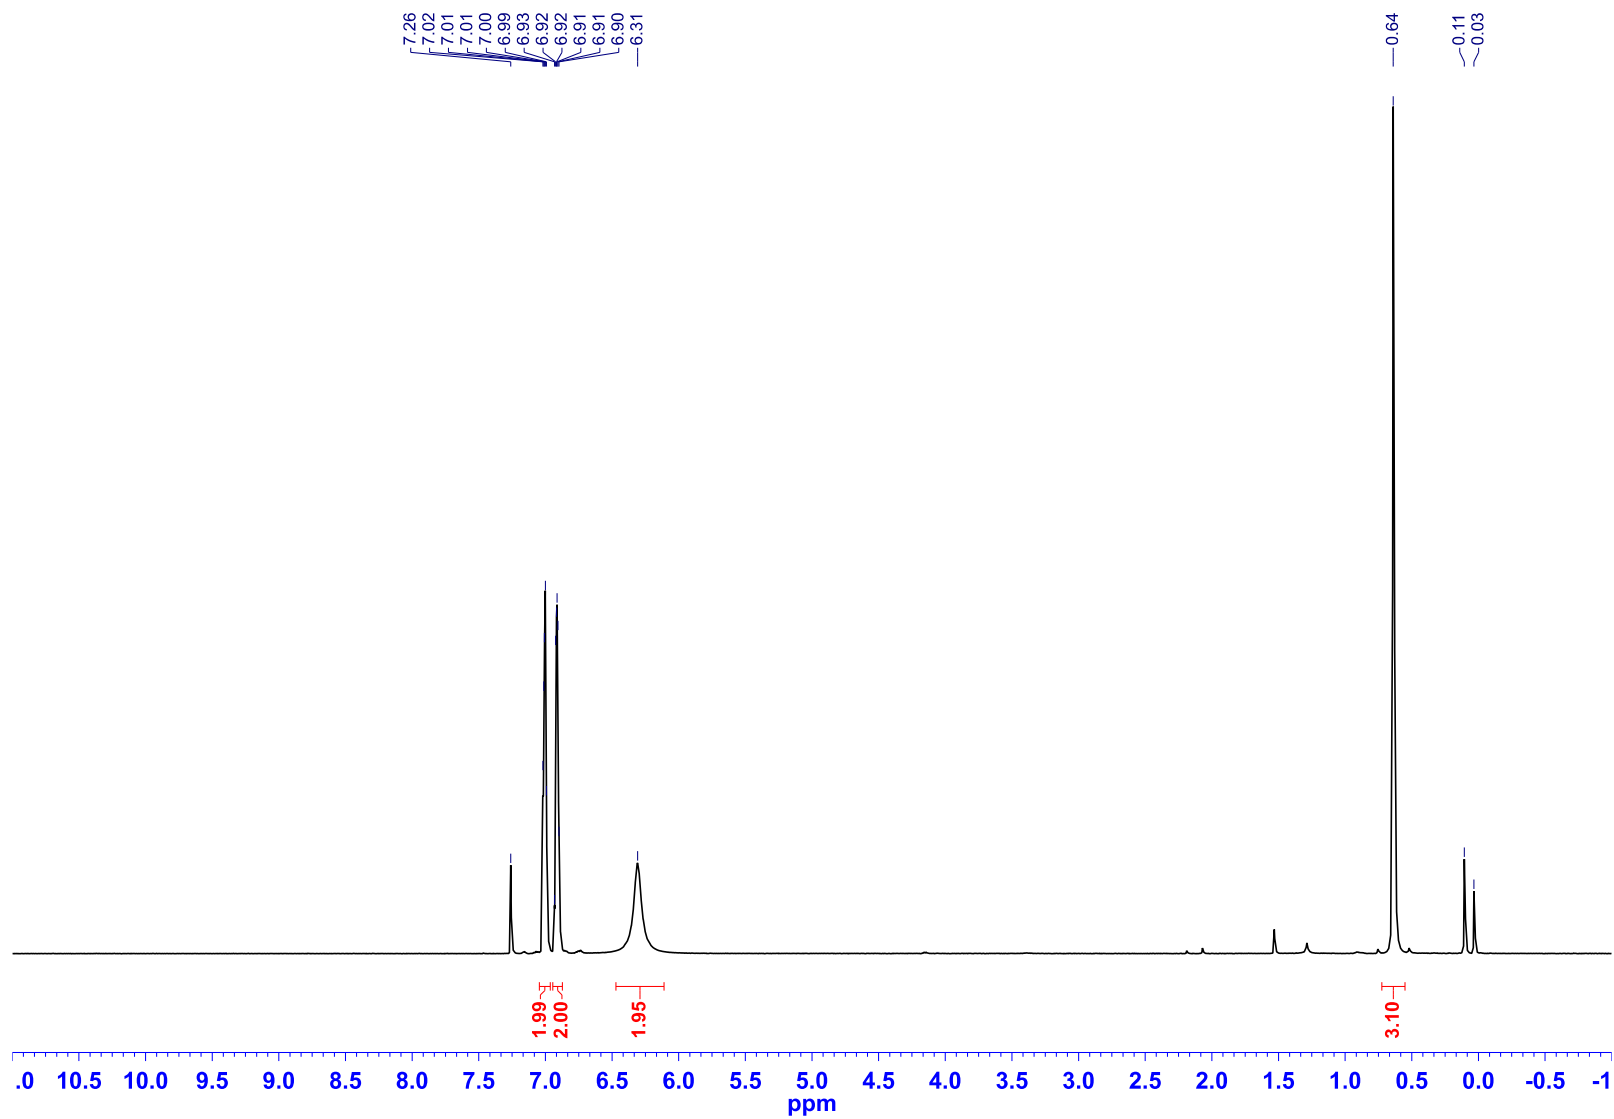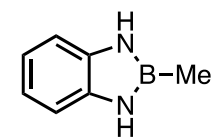

$^{13}\text{C}$  NMR (125.8 MHz,  $\text{CDCl}_3$ ) of 2-methyl-2,3-dihydro-1*H*-1,3,2-benzodiazaborole (**7a**)

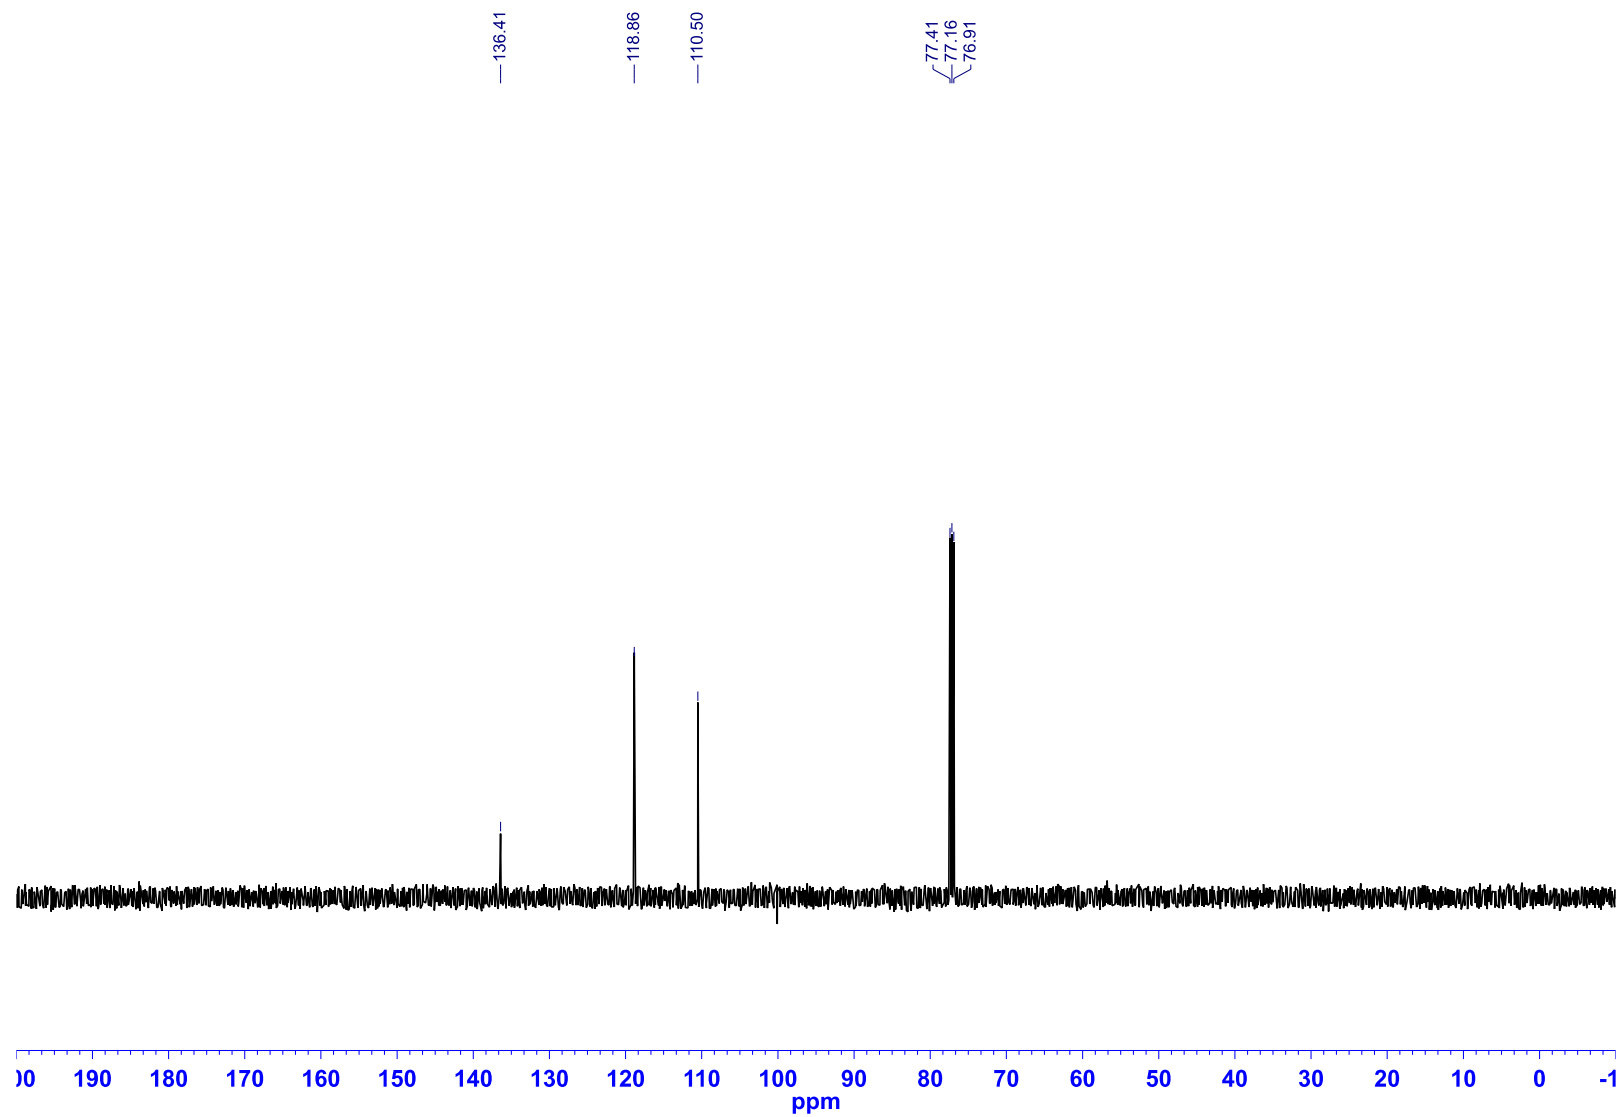

$^{11}\text{B}$  NMR (128.4 MHz,  $\text{CDCl}_3$ ) of 2-methyl-2,3-dihydro-1*H*-1,3,2-benzodiazaborole (**7a**)

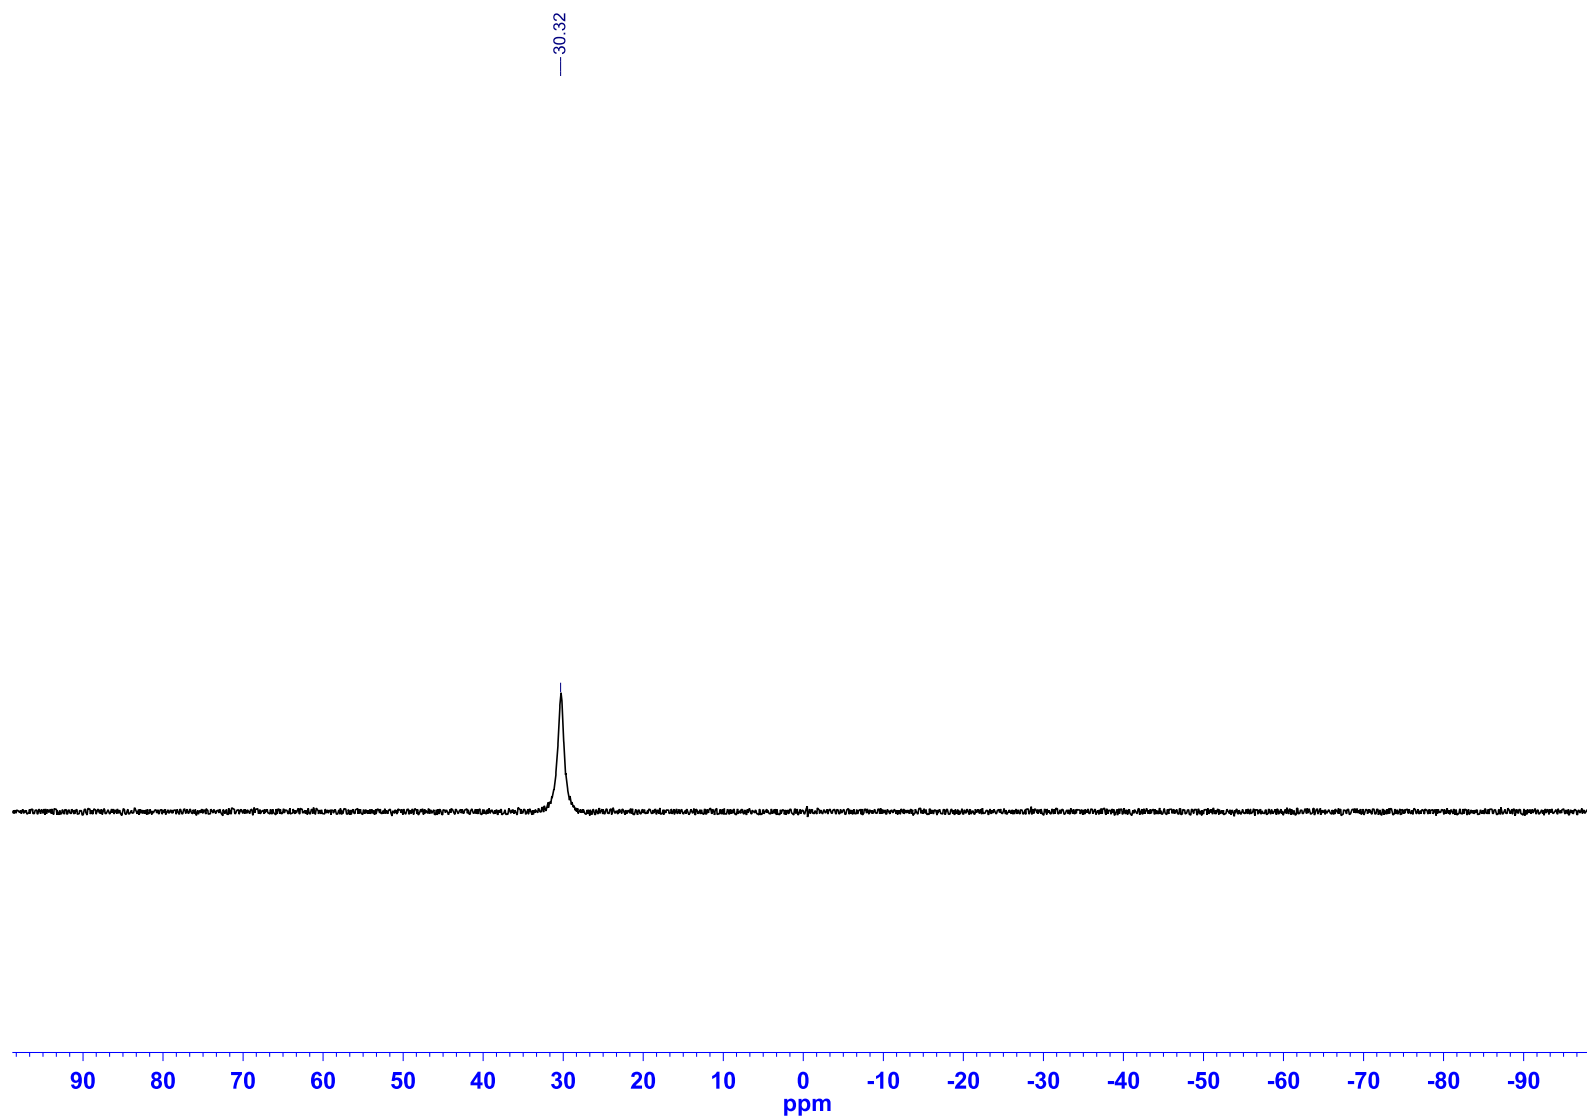

$^1\text{H}$  NMR (500.4 MHz,  $\text{CDCl}_3$ ) of 2-isopropyl-2,3-dihydro-1*H*-1,3,2-benzodiazaborole (**7b**)

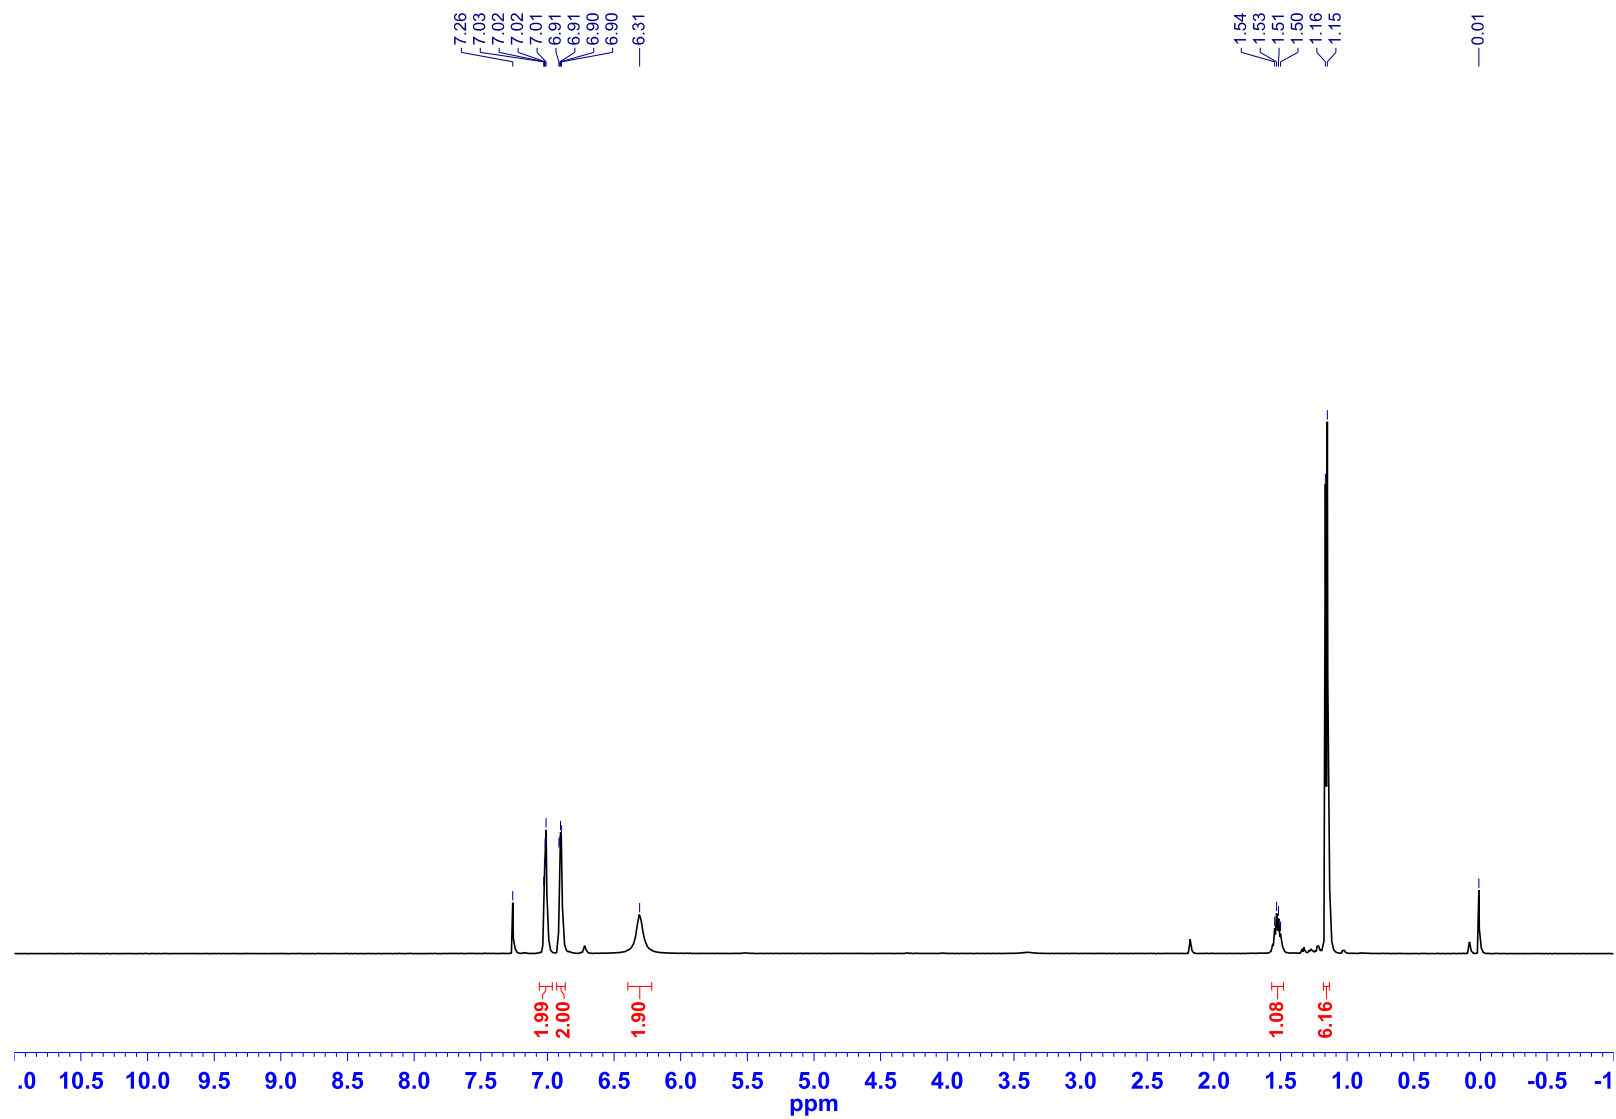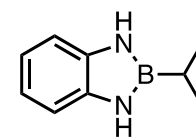

$^{13}\text{C}$  NMR (125.8 MHz,  $\text{CDCl}_3$ ) of 2-isopropyl-2,3-dihydro-1*H*-1,3,2-benzodiazaborole (**7b**)

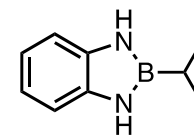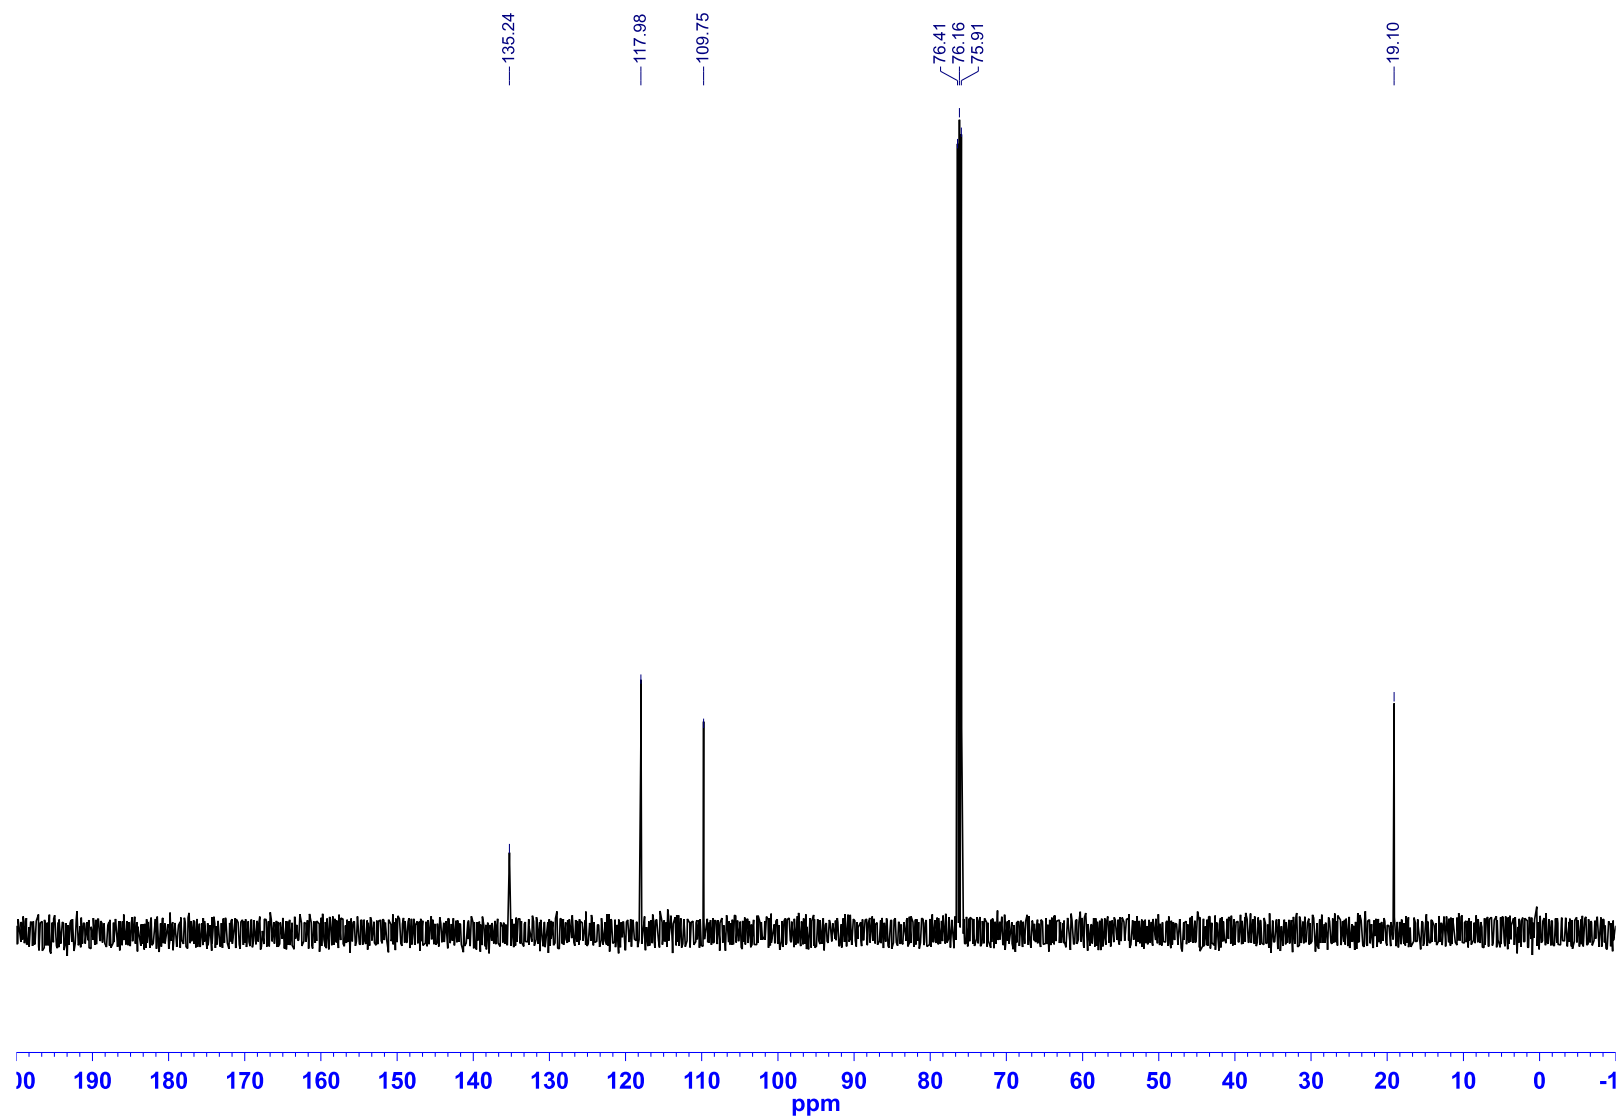

$^{11}\text{B}$  NMR (128.4 MHz,  $\text{CDCl}_3$ ) of 2-isopropyl-2,3-dihydro-1*H*-1,3,2-benzodiazaborole (**7b**)

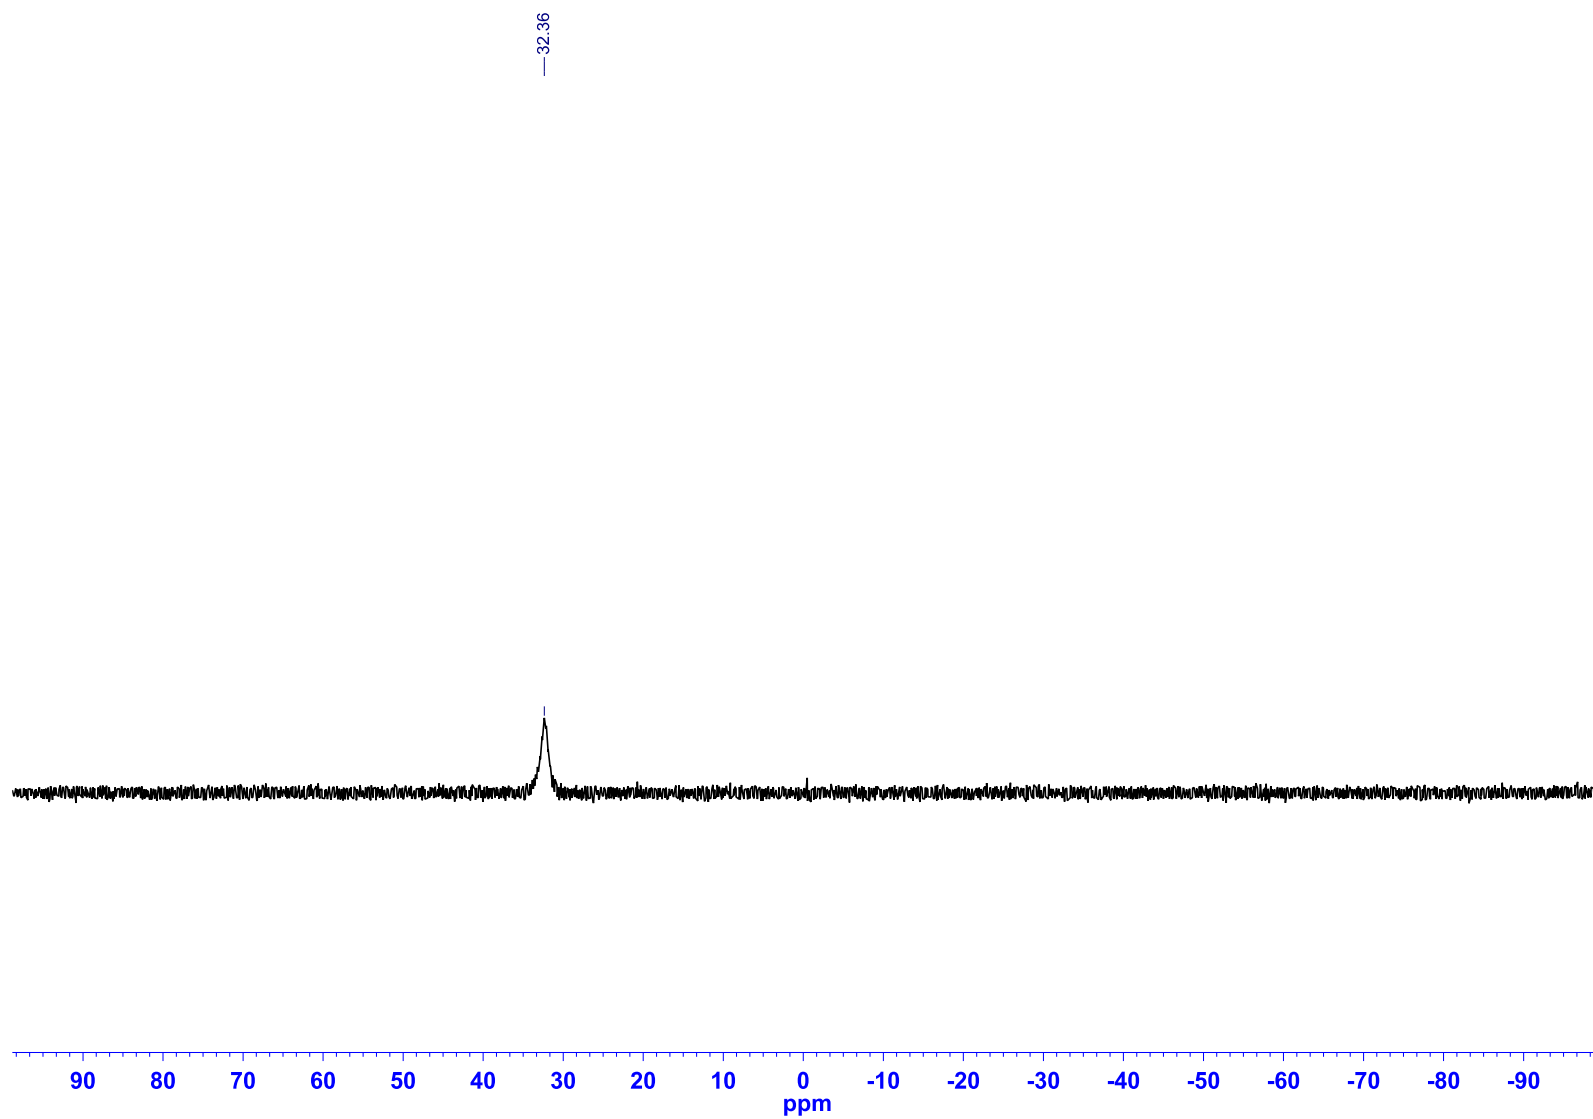

$^1\text{H}$  NMR (500.4 MHz,  $\text{CDCl}_3$ ) of 2-cyclopropyl-2,3-dihydro-1*H*-1,3,2-benzodiazaborole (**7c**)

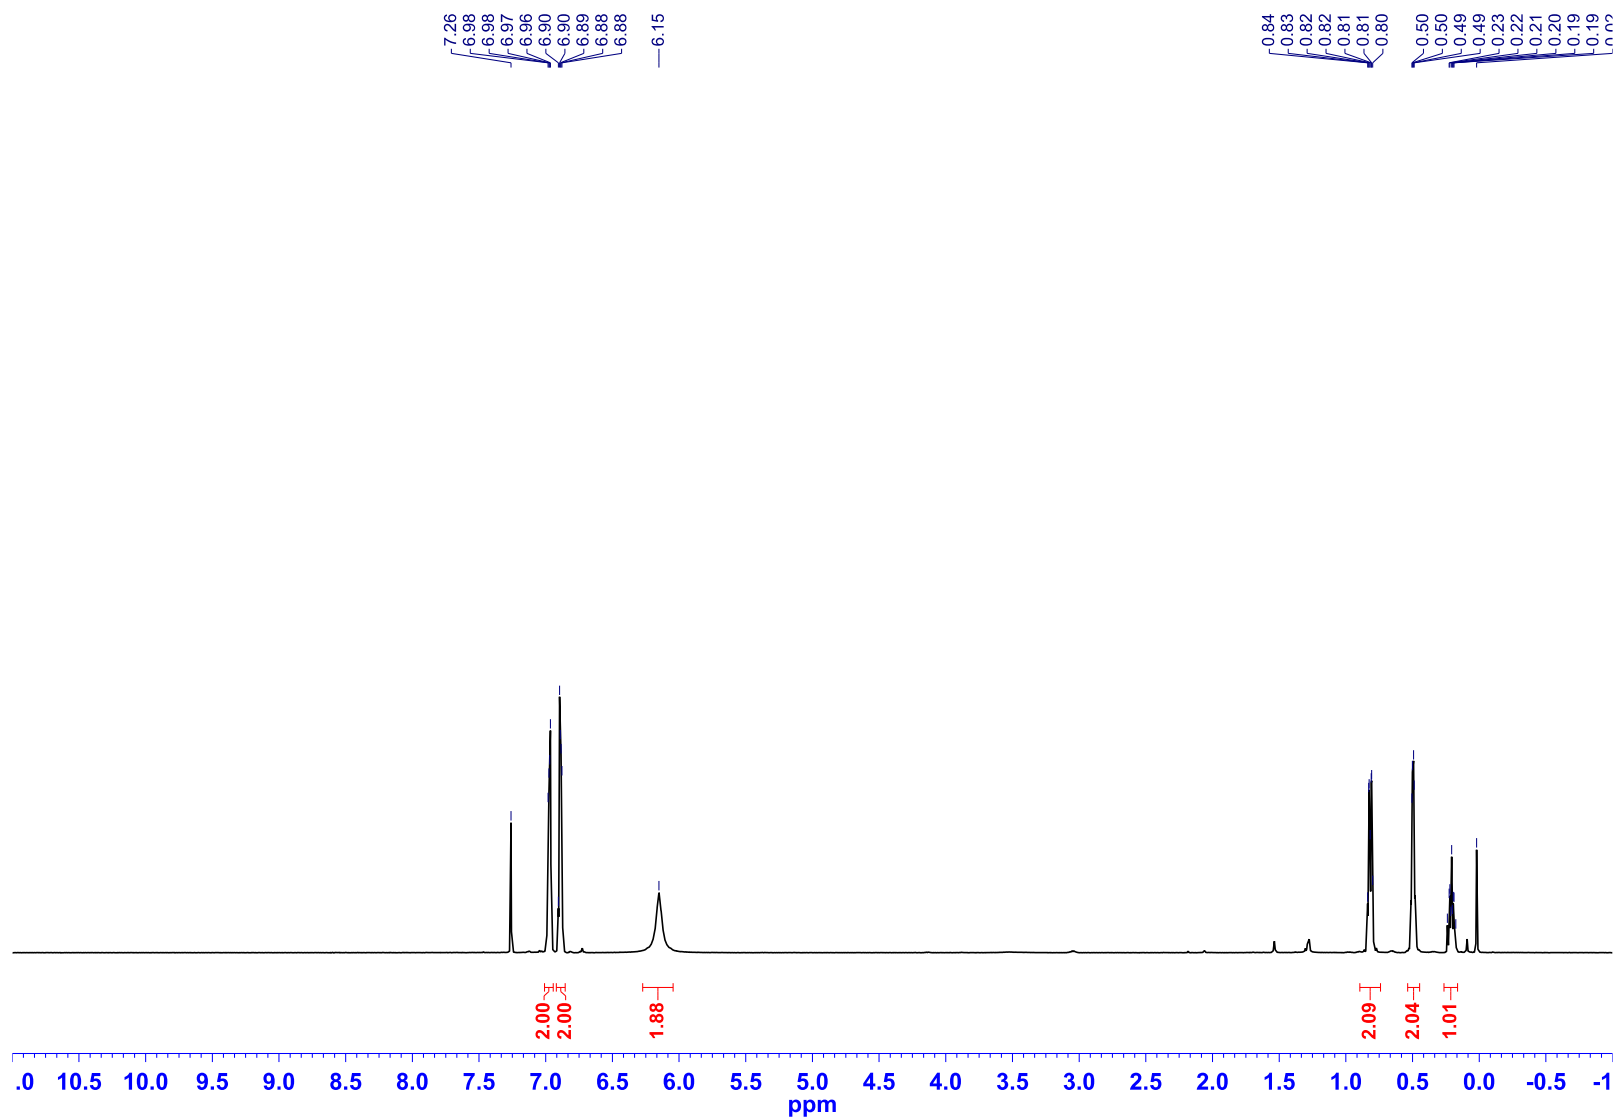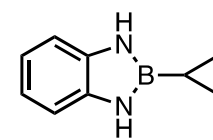

$^{13}\text{C}$  NMR (125.8 MHz,  $\text{CDCl}_3$ ) of 2-cyclopropyl-2,3-dihydro-1H-1,3,2-benzodiazaborole (**7c**)

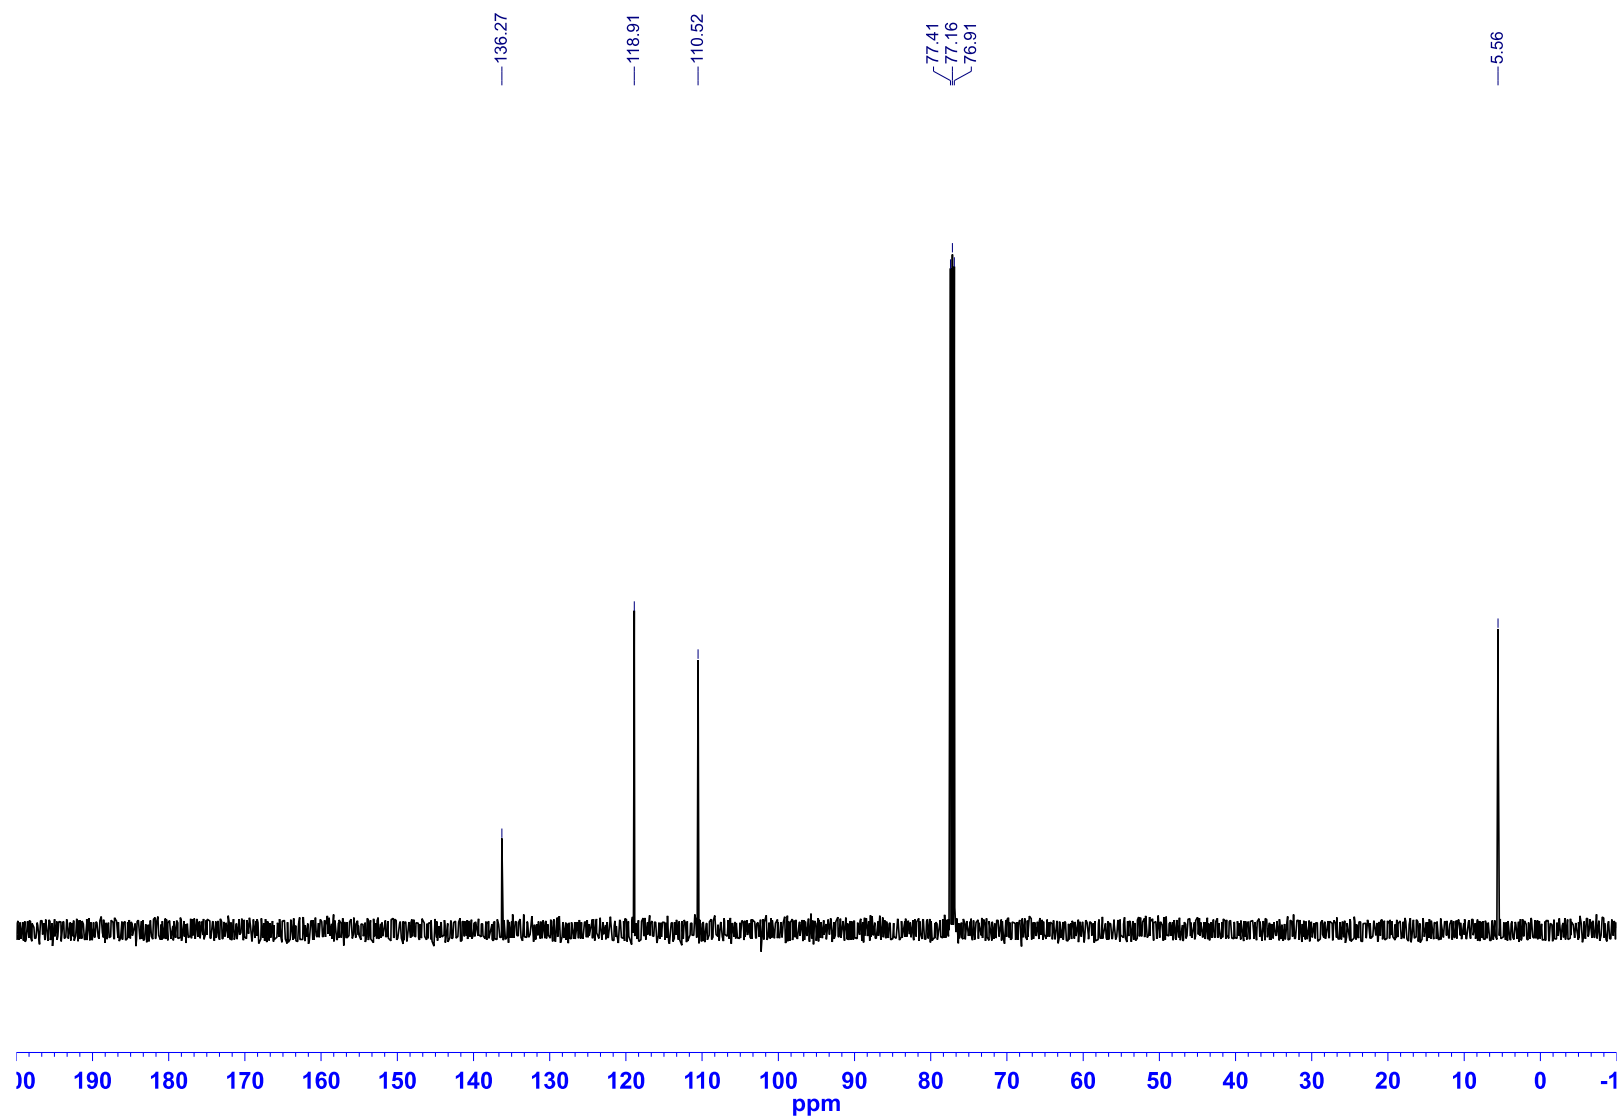



$^{11}\text{B}$  NMR (128.4 MHz, MeCN) of 2-cyclopropyl-2,3-dihydro-1*H*-1,3,2-benzodiazaborole (**7c**)

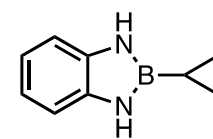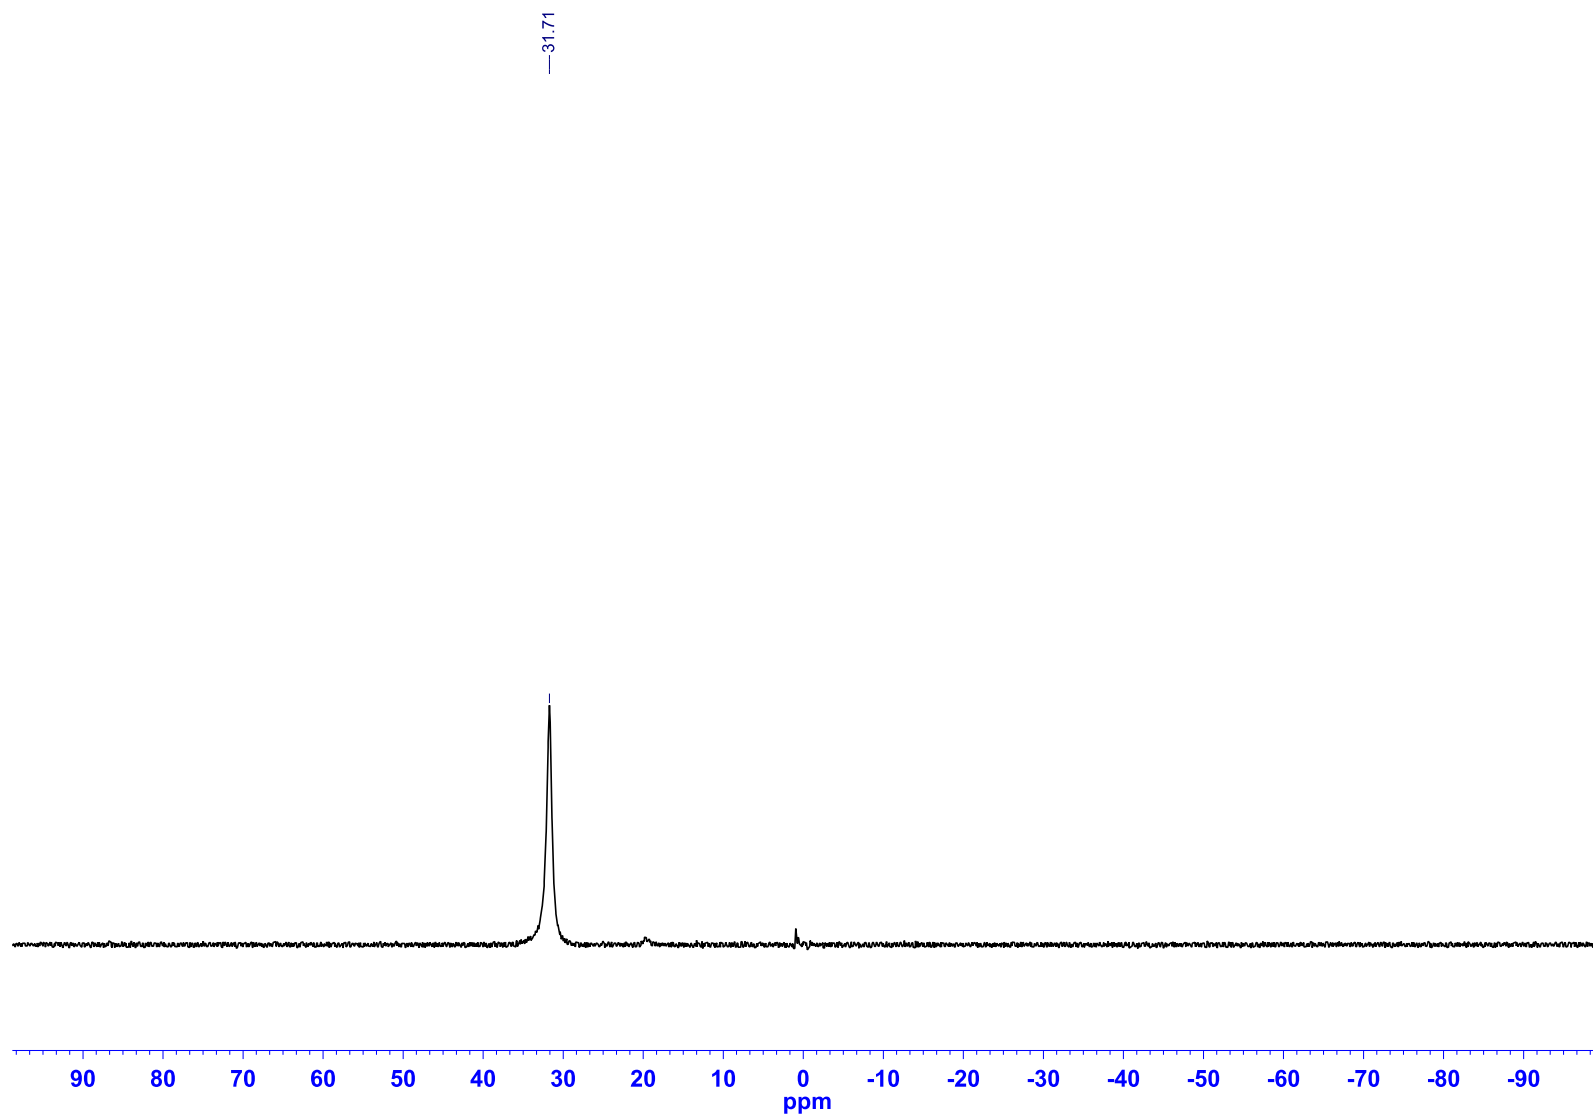

$^1\text{H}$  NMR (500.4 MHz,  $\text{CDCl}_3$ ) of 2-(*tert*-butyl)-2,3-dihydro-1*H*-1,3,2-benzodiazaborole (**7d**)

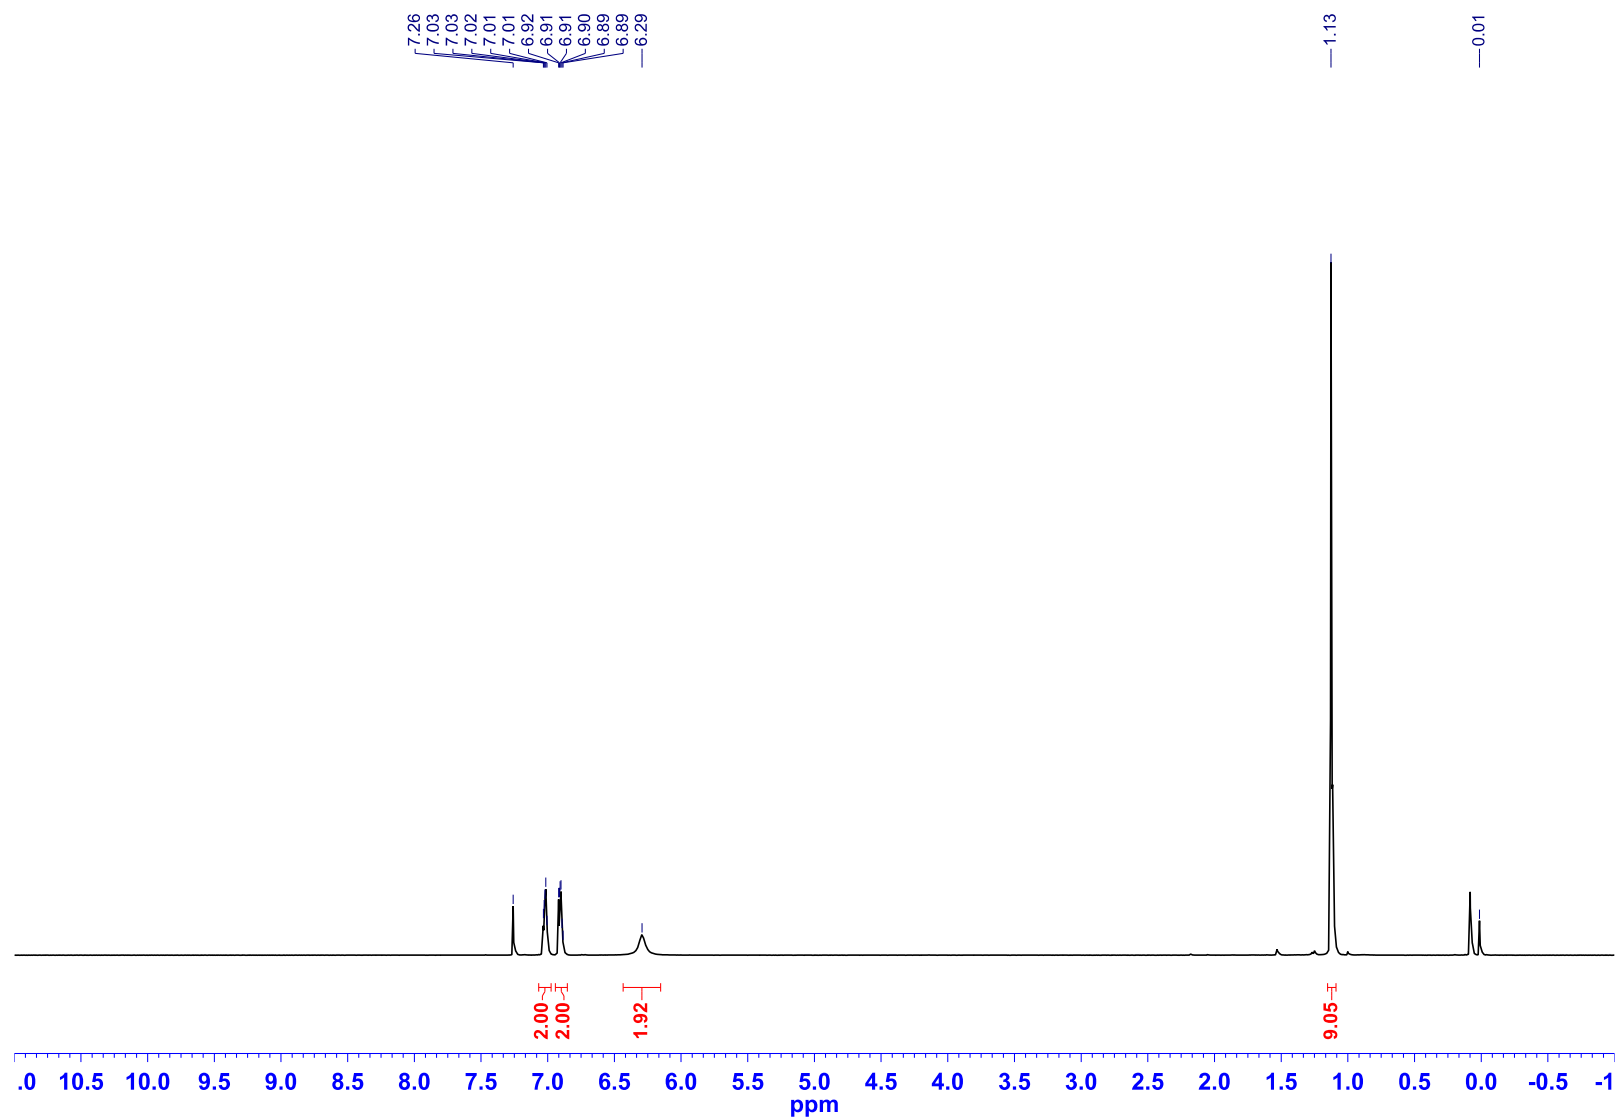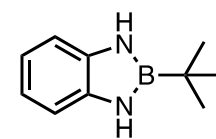

$^{13}\text{C}$  NMR (125.8 MHz,  $\text{CDCl}_3$ ) of 2-(*tert*-butyl)-2,3-dihydro-1*H*-1,3,2-benzodiazaborole (**7d**)

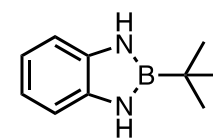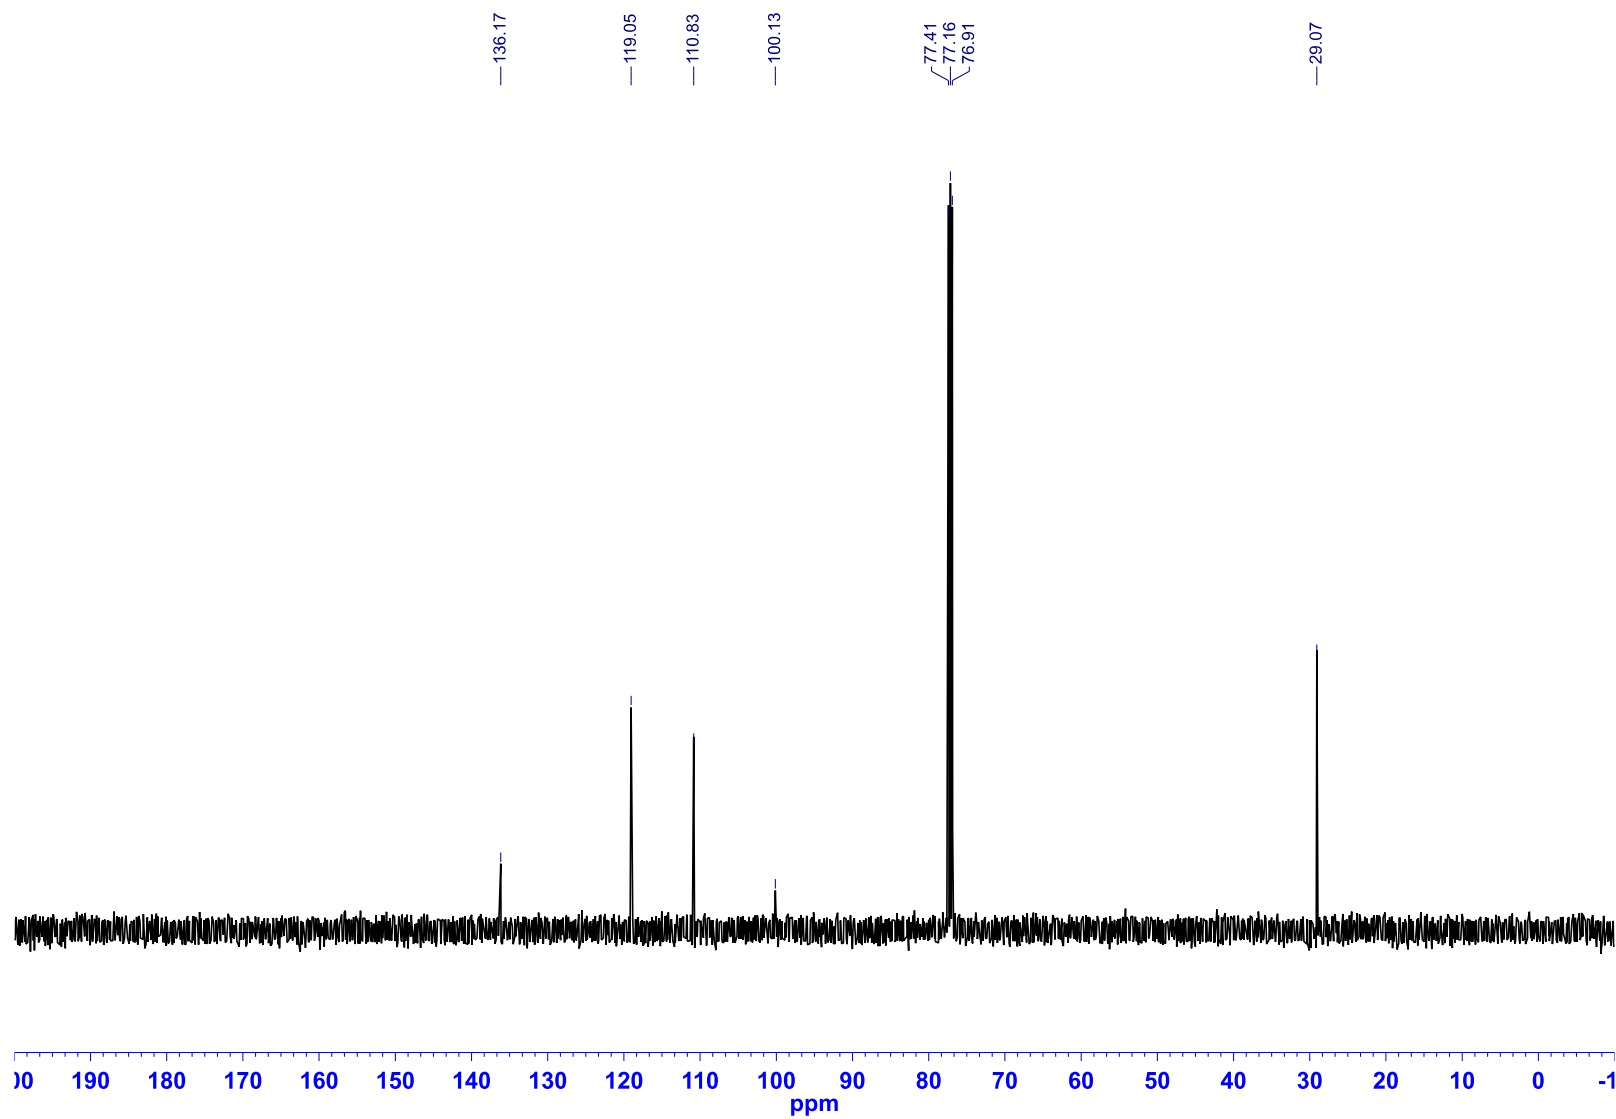

$^{11}\text{B}$  NMR (128.4 MHz,  $\text{CDCl}_3$ ) of 2-(*tert*-butyl)-2,3-dihydro-1*H*-1,3,2-benzodiazaborole (**7d**)

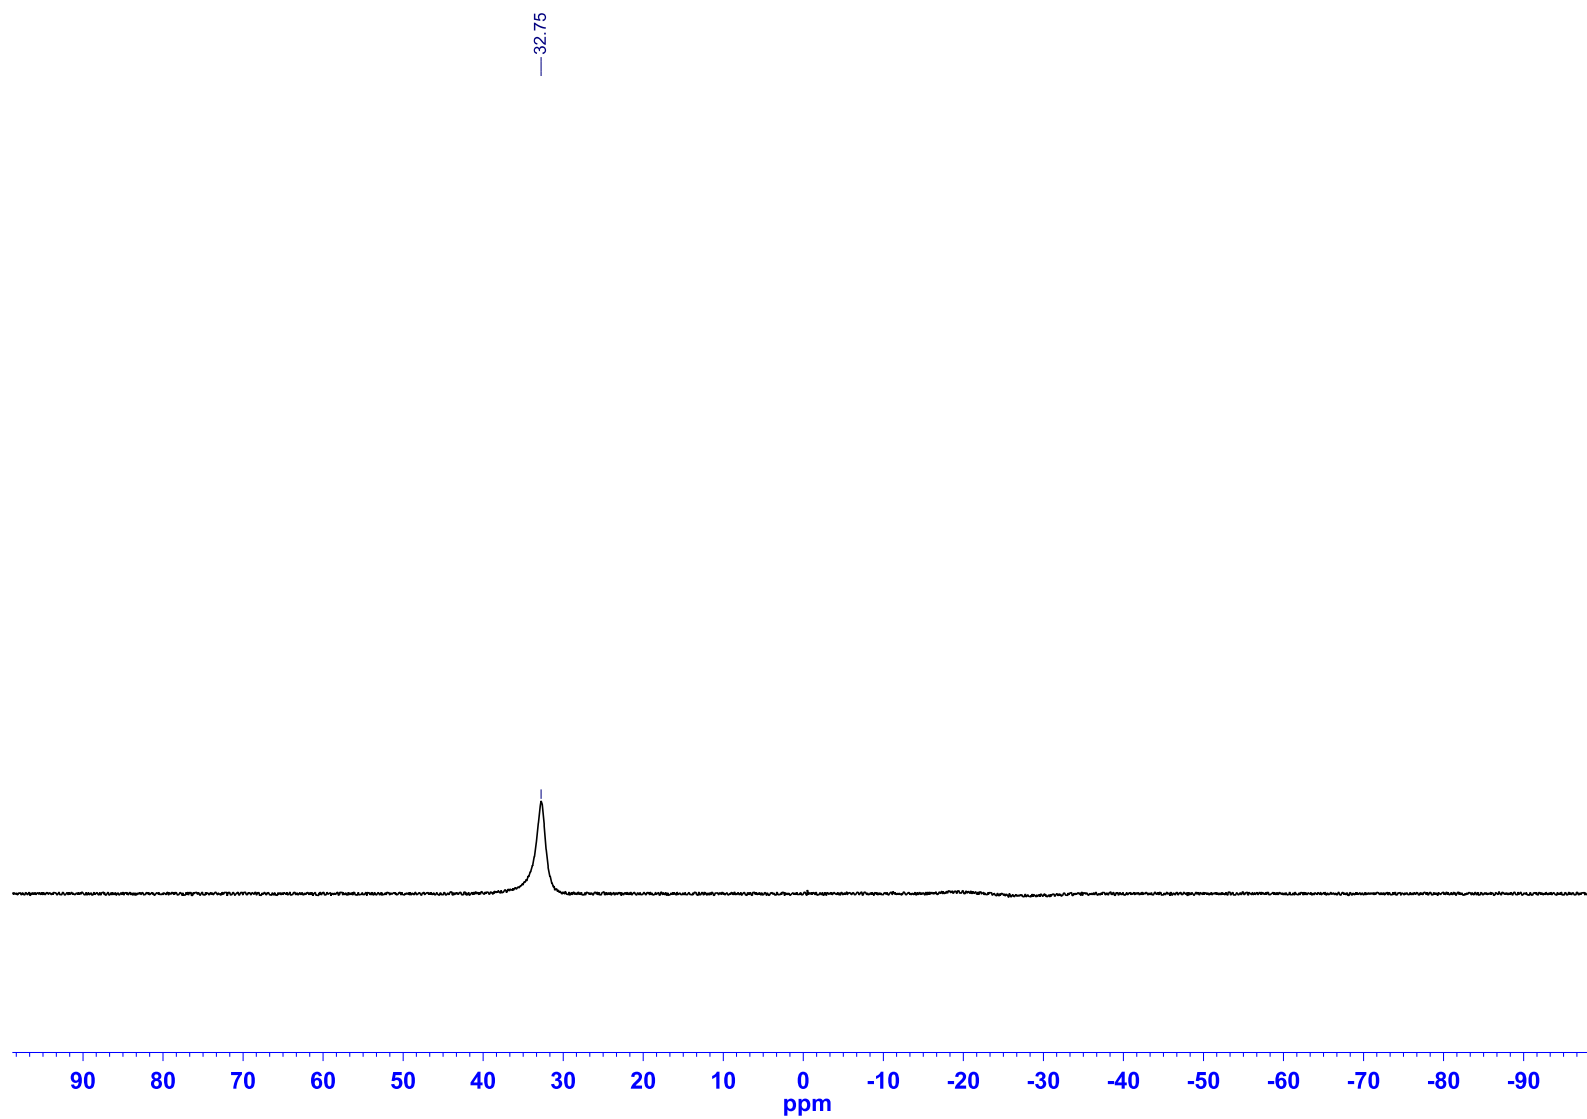

$^1\text{H}$  NMR (500.4 MHz,  $\text{CDCl}_3$ ) of 2-phenethyl-2,3-dihydro-1*H*-1,3,2-benzodiazaborole (**7e**)

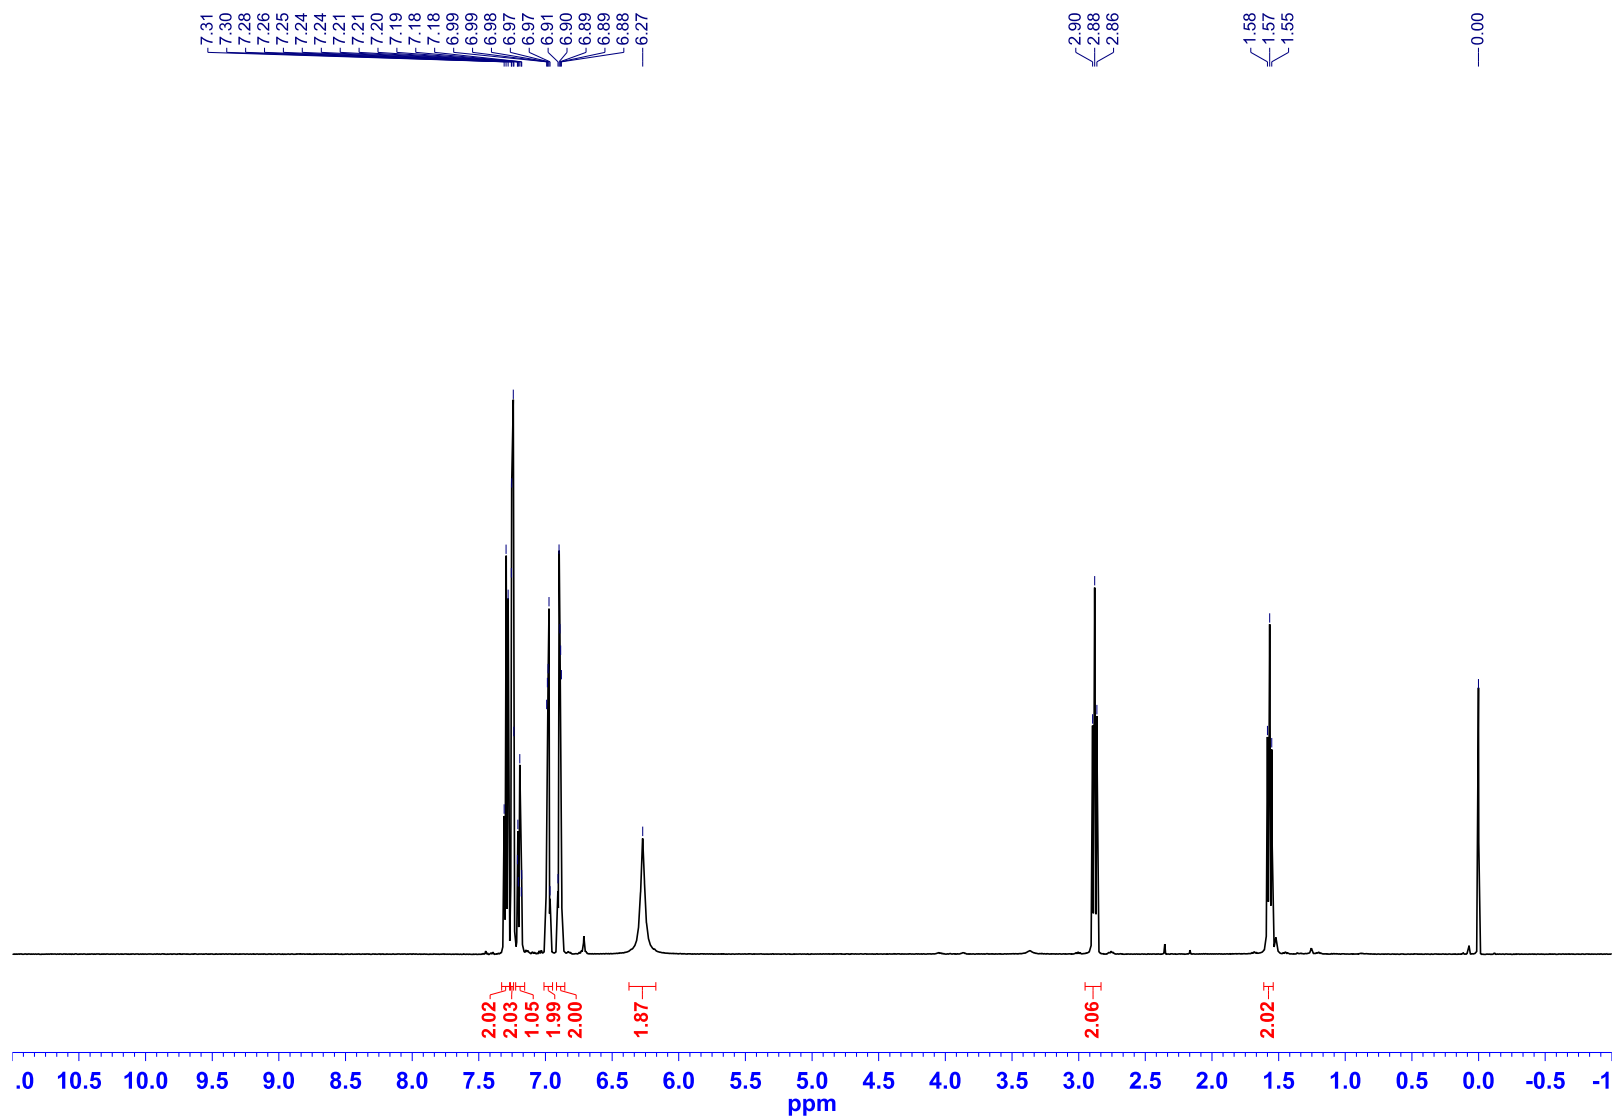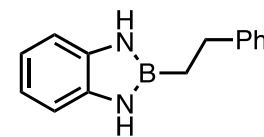

$^{13}\text{C}$  NMR (125.8 MHz,  $\text{CDCl}_3$ ) of 2-phenethyl-2,3-dihydro-1*H*-1,3,2-benzodiazaborole (**7e**)

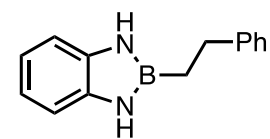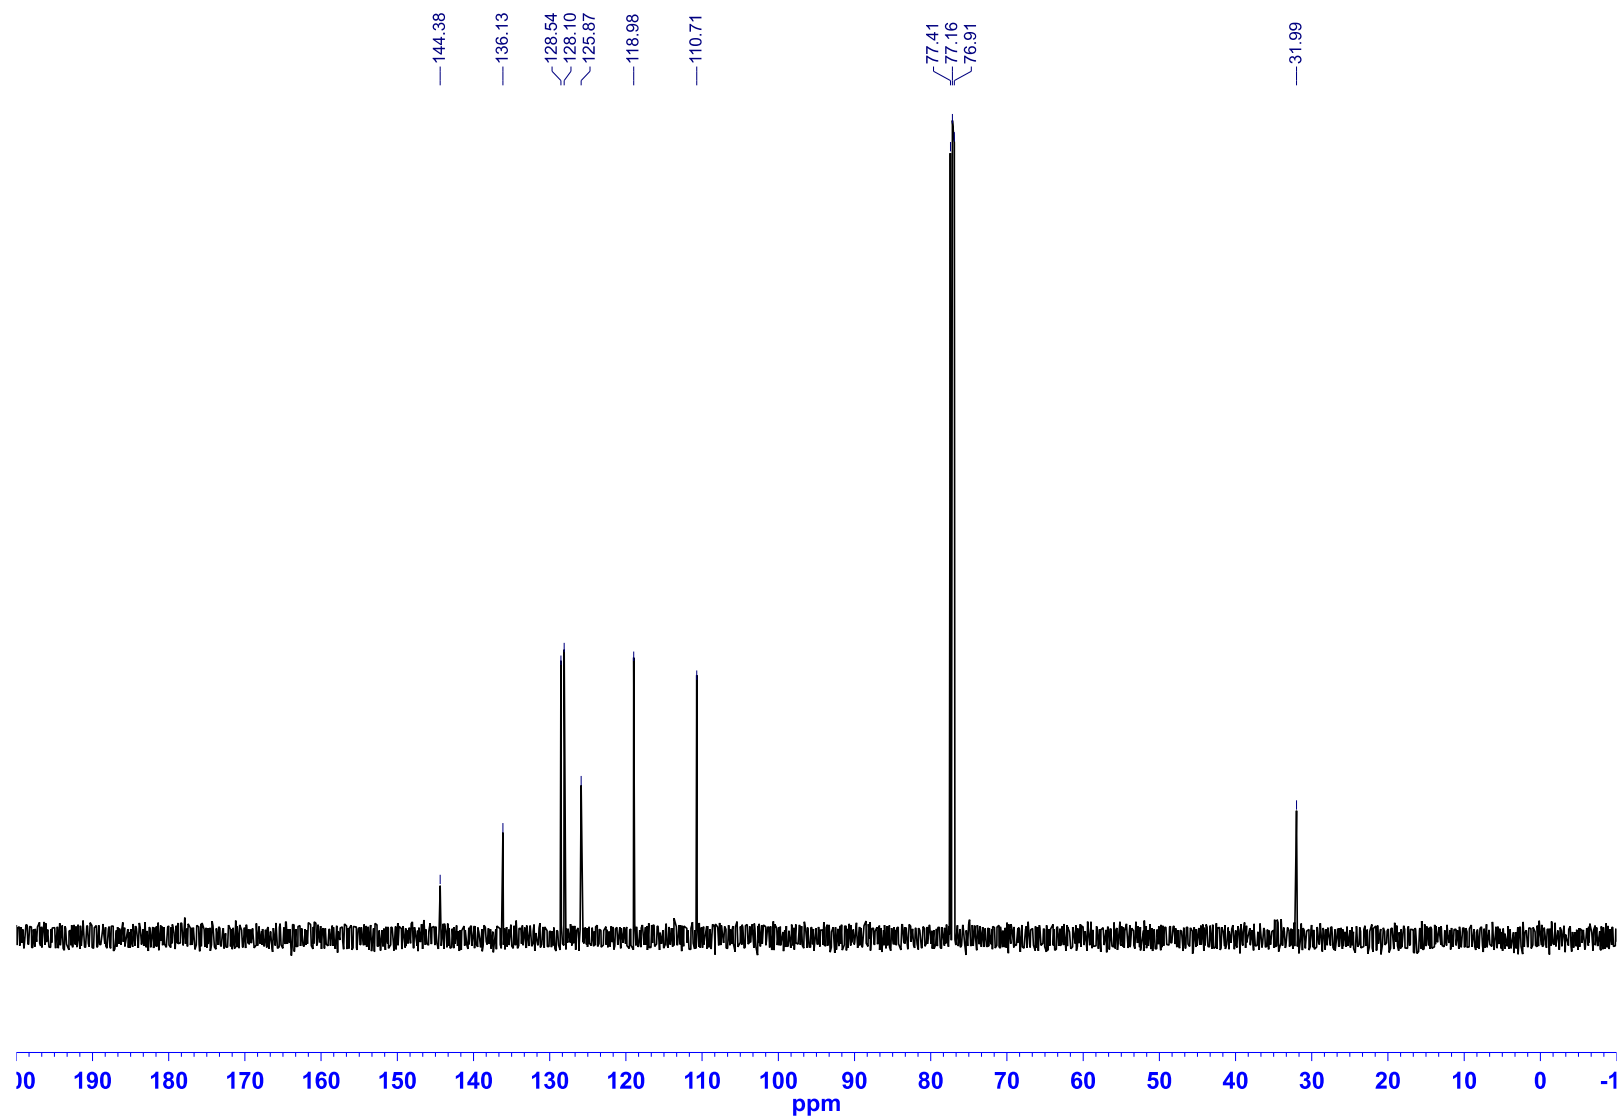

$^{11}\text{B}$  NMR (128.4 MHz, MeCN) of 2-phenethyl-2,3-dihydro-1*H*-1,3,2-benzodiazaborole (**7e**)

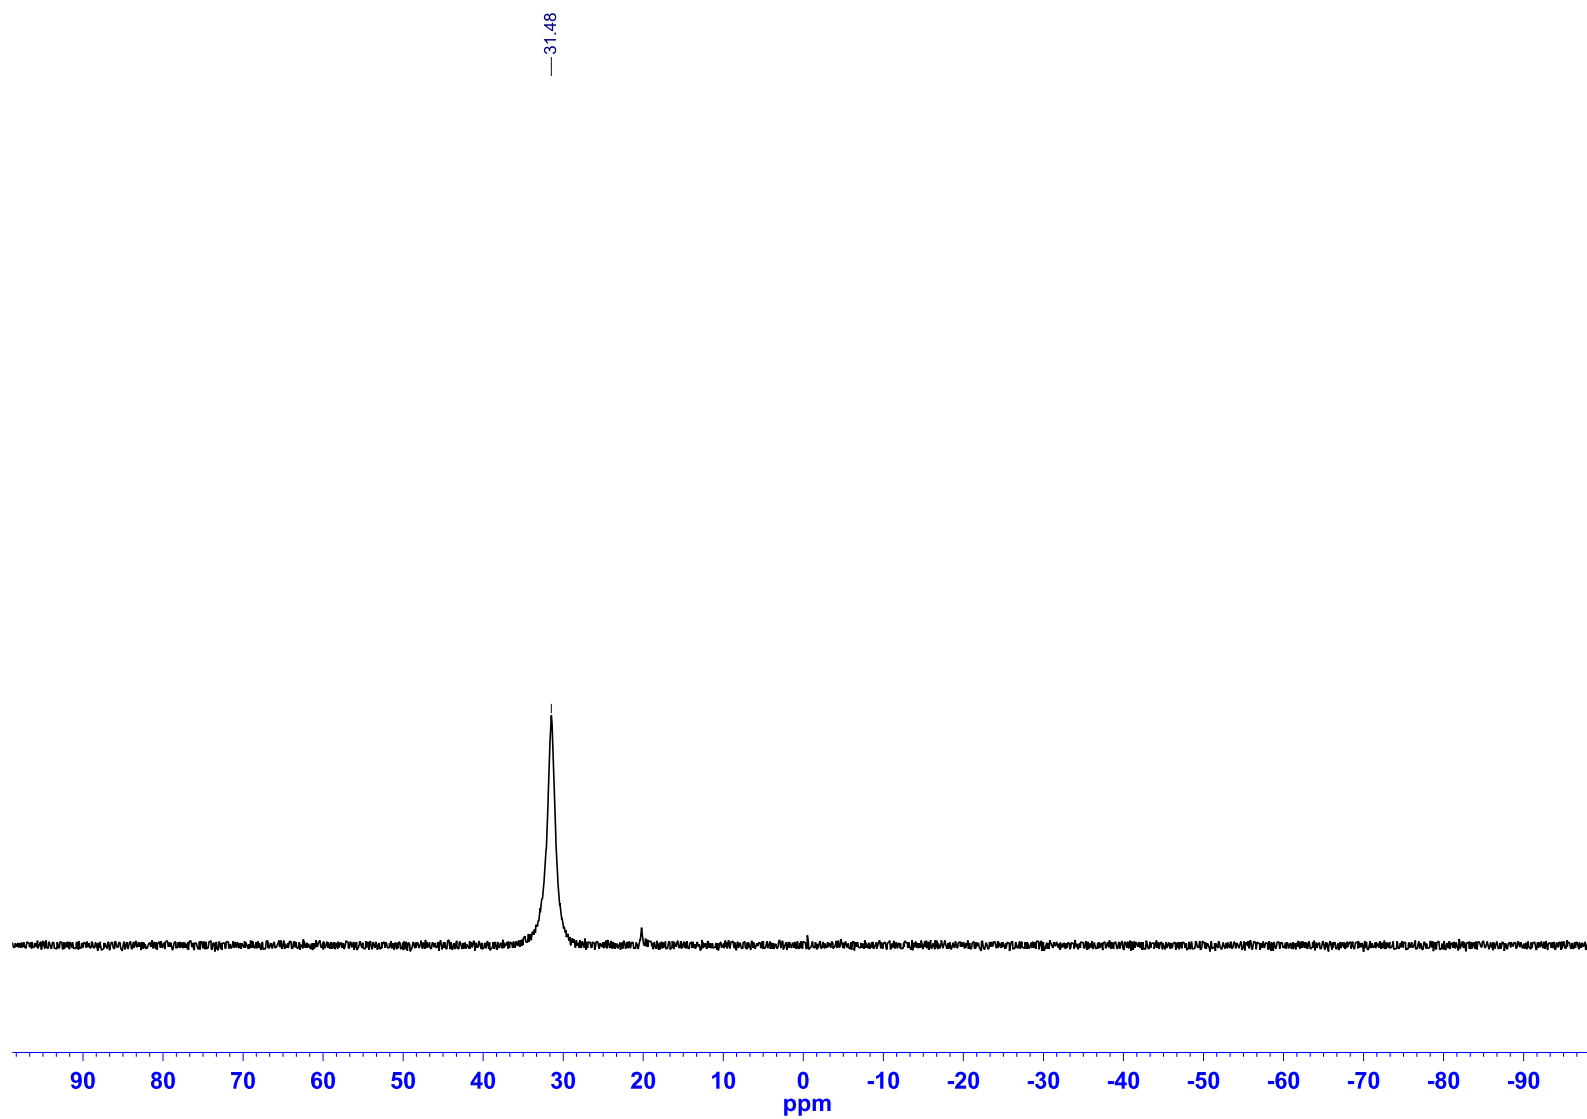

$^1\text{H}$  NMR (500.4 MHz,  $\text{CDCl}_3$ ) of 1,2-dimethyl-2,3-dihydro-1*H*-1,3,2-benzodiazaborole (**7f**)

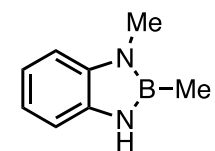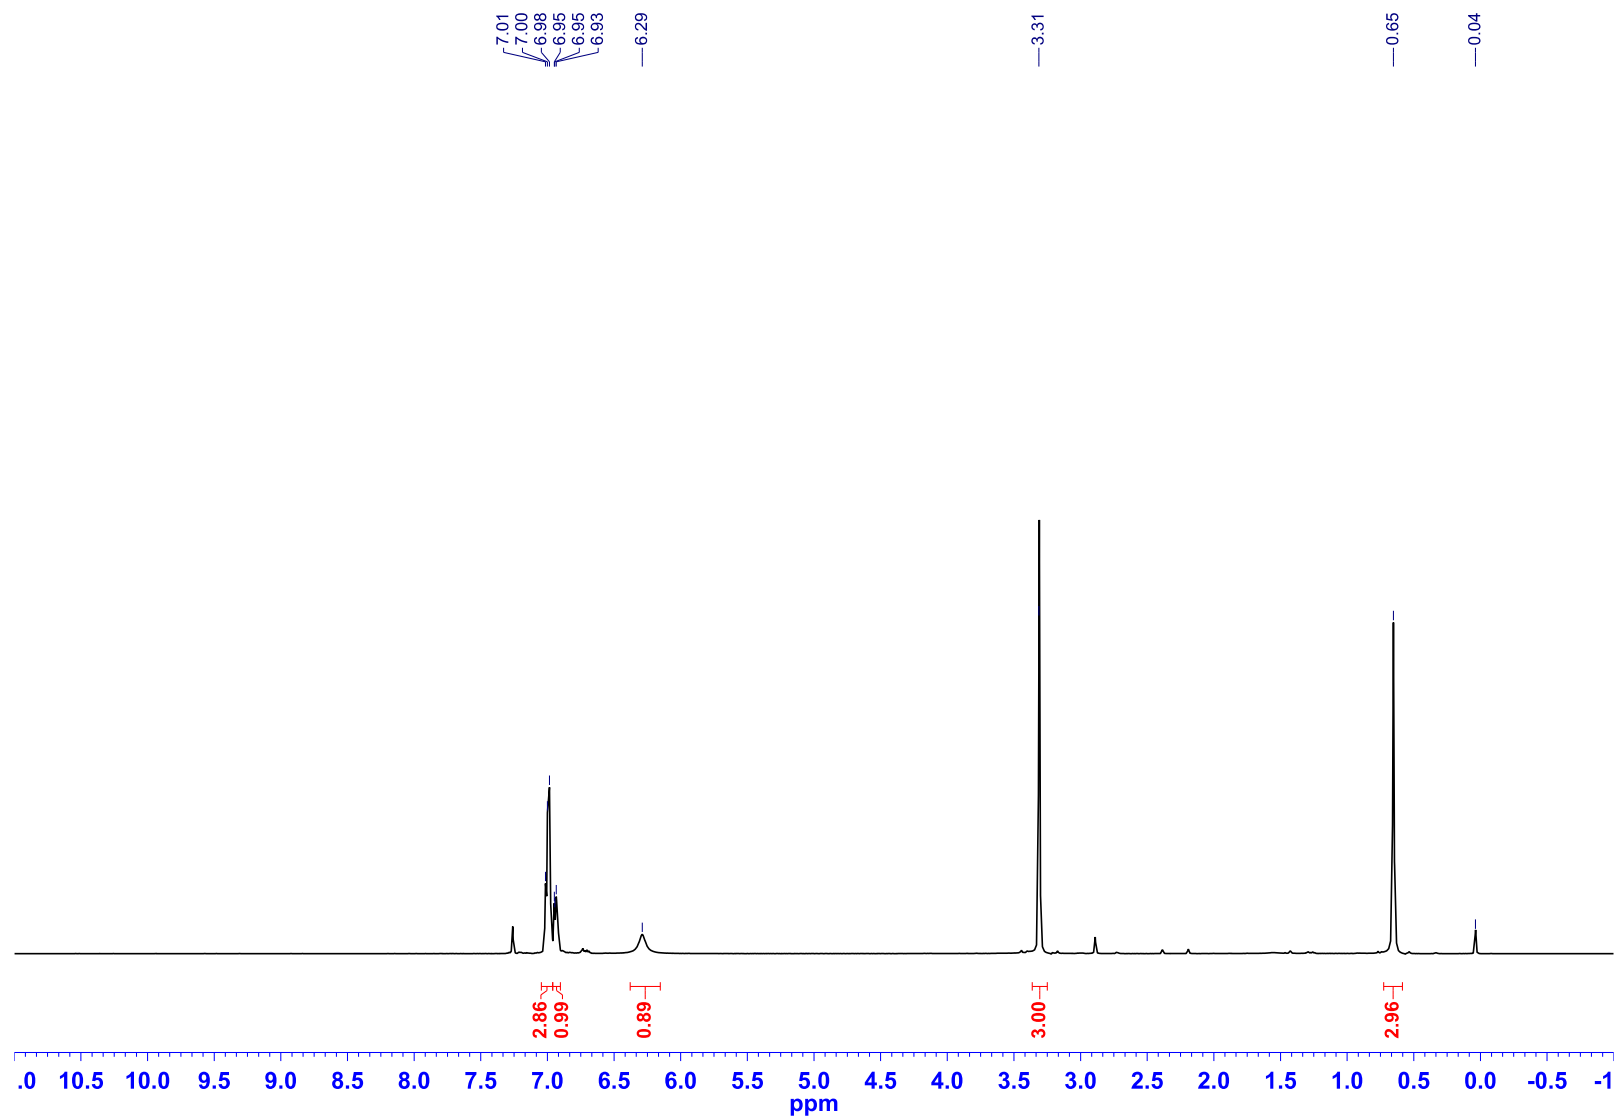



$^{13}\text{C}$  NMR (125.8 MHz,  $\text{CDCl}_3$ ) of 1,2-dimethyl-2,3-dihydro-1*H*-1,3,2-benzodiazaborole (**7f**)

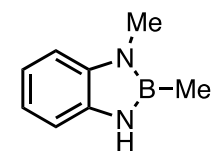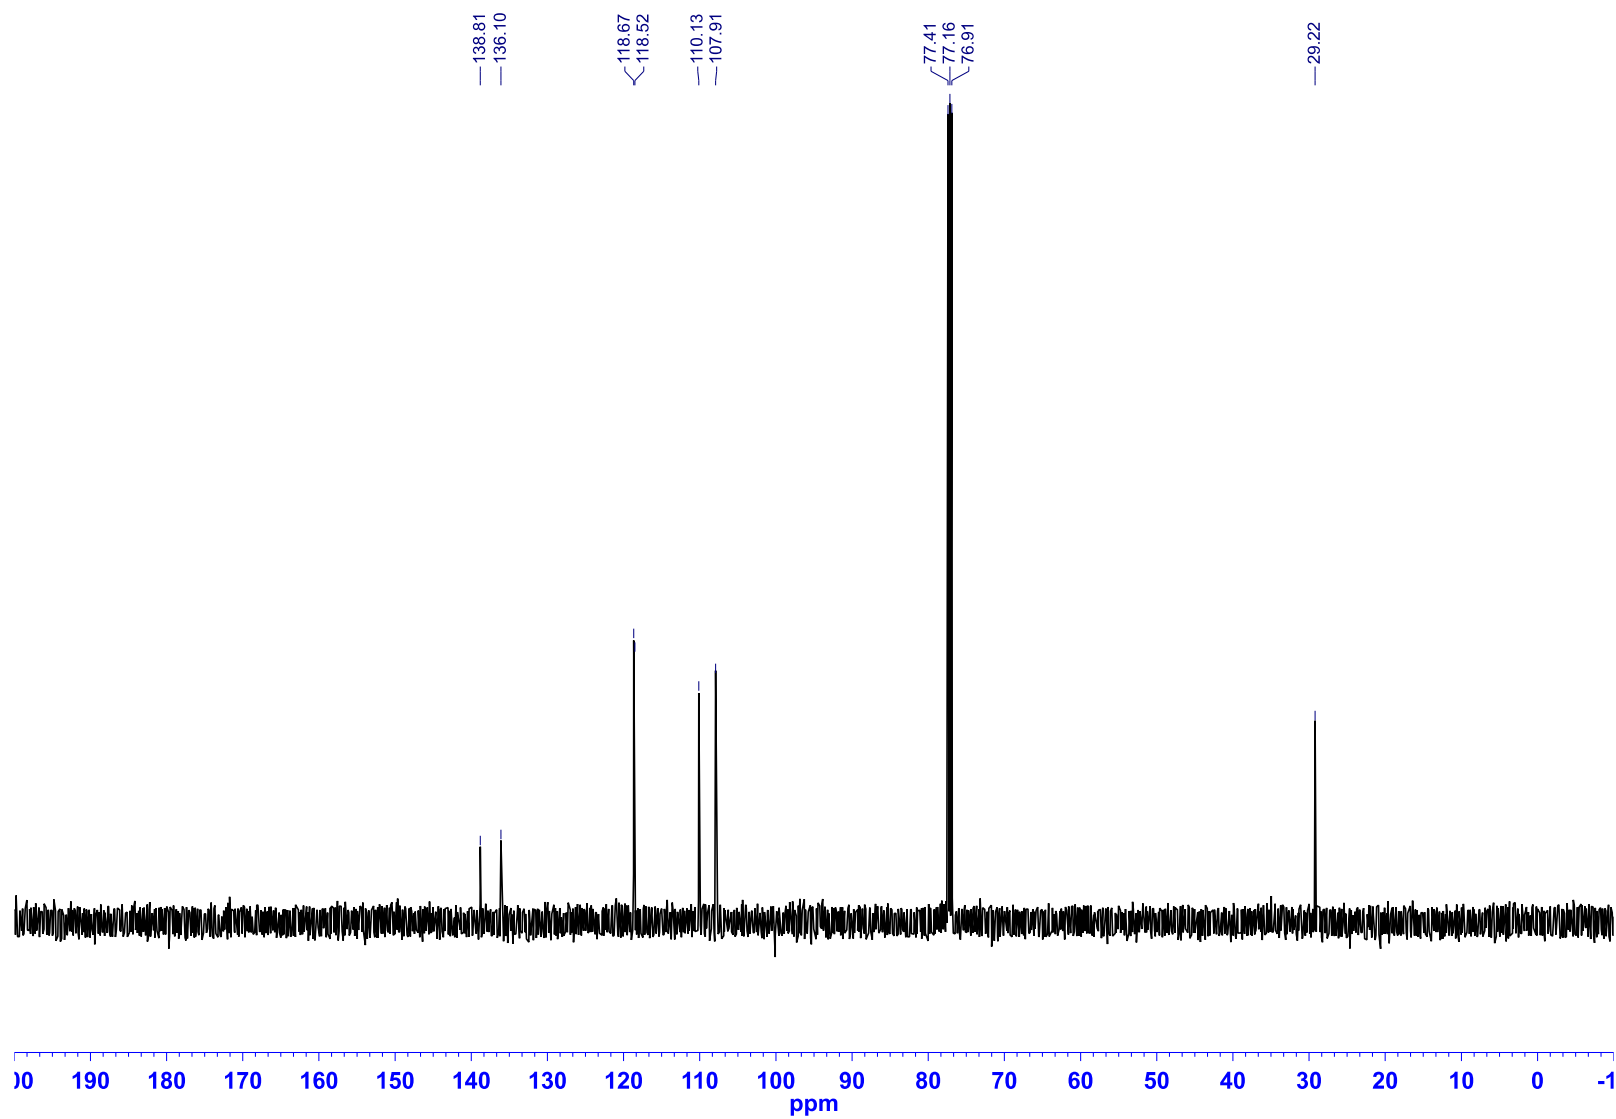

$^{11}\text{B}$  NMR (128.4 MHz, MeCN) of 1,2-dimethyl-2,3-dihydro-1*H*-1,3,2-benzodiazaborole (**7f**)

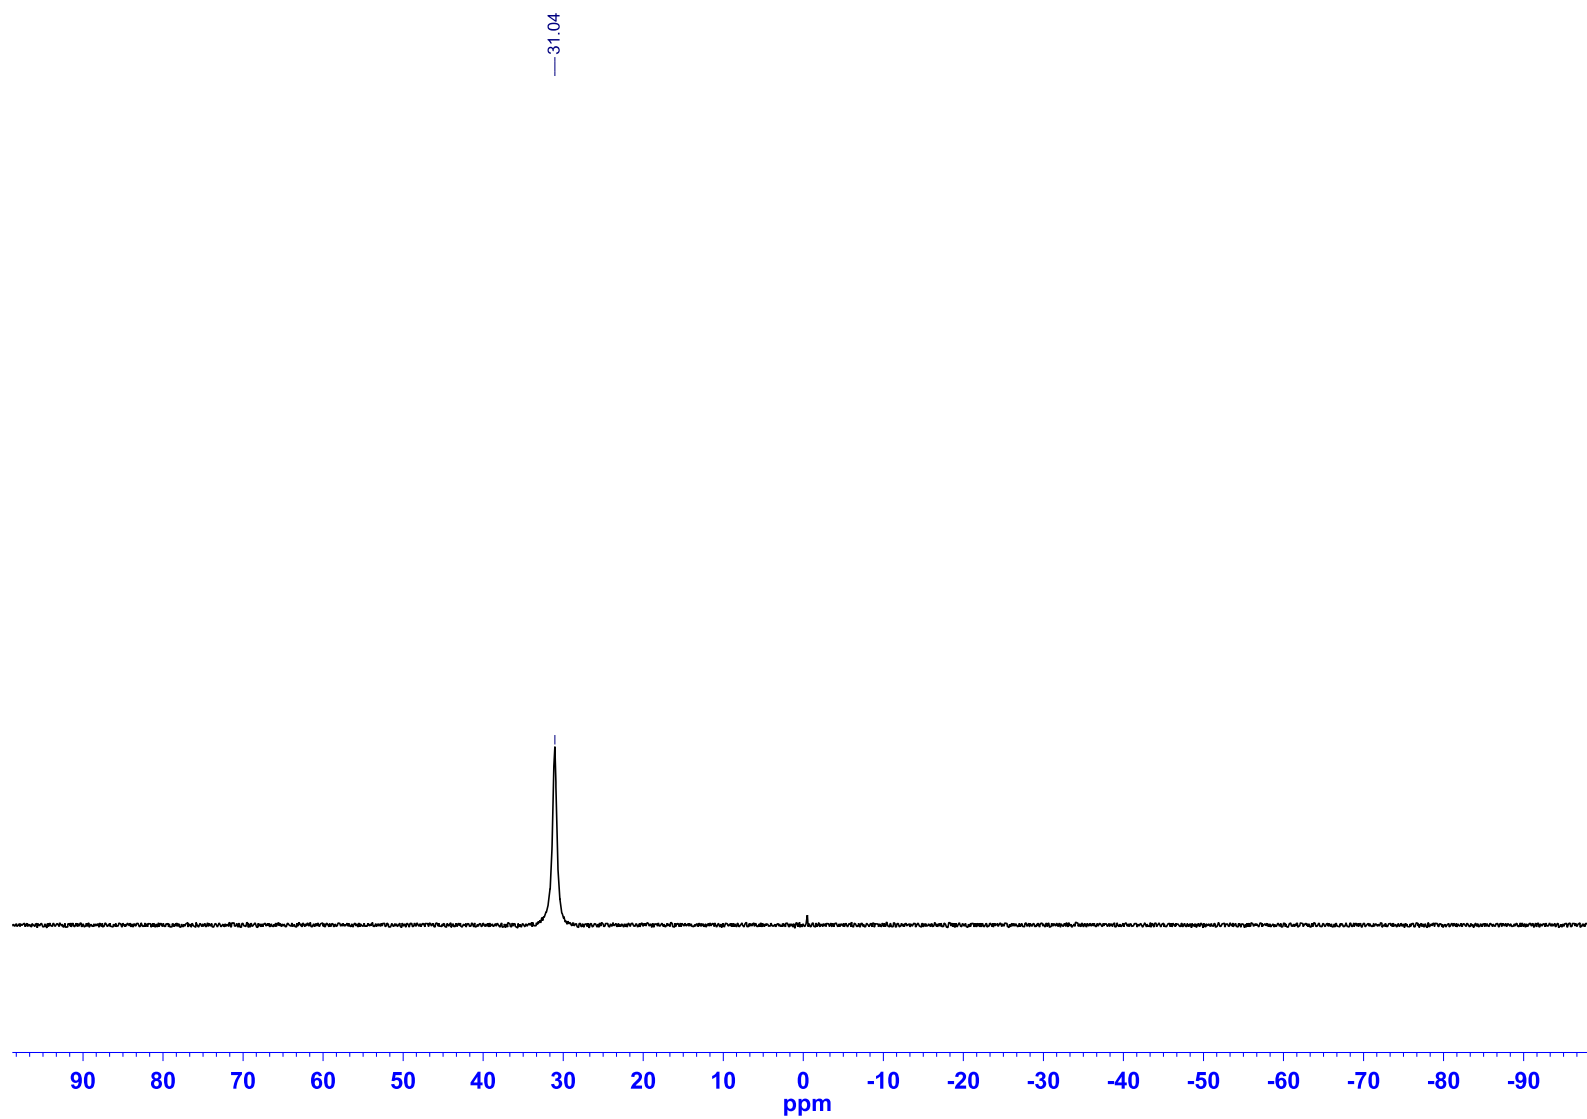

<sup>1</sup>H NMR (500.4 MHz, CDCl<sub>3</sub>) of 2-(3-chloropropyl)-1-methyl-2,3-dihydro-1*H*-1,3,2-benzodiazaborole (**7g**)

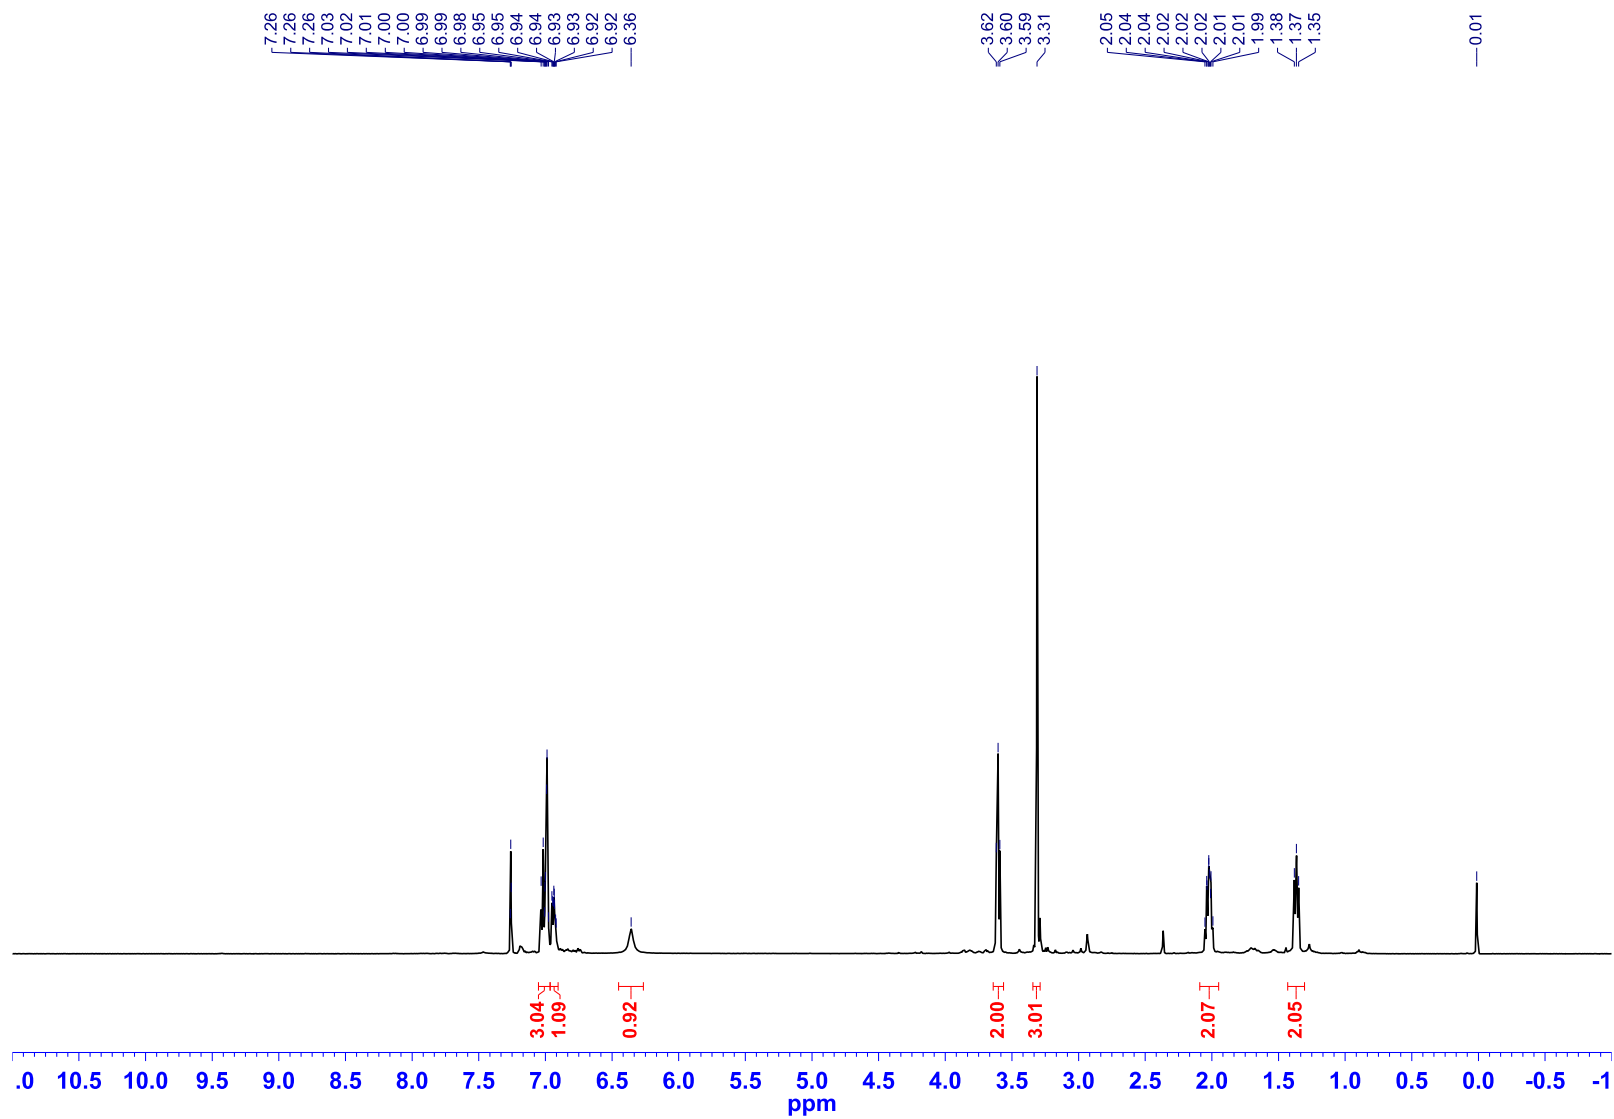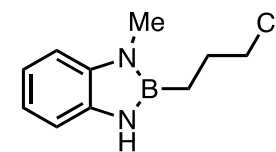

$^{13}\text{C}$  NMR (125.8 MHz,  $\text{CDCl}_3$ ) of 2-(3-chloropropyl)-1-methyl-2,3-dihydro-1*H*-1,3,2-benzodiazaborole (**7g**)

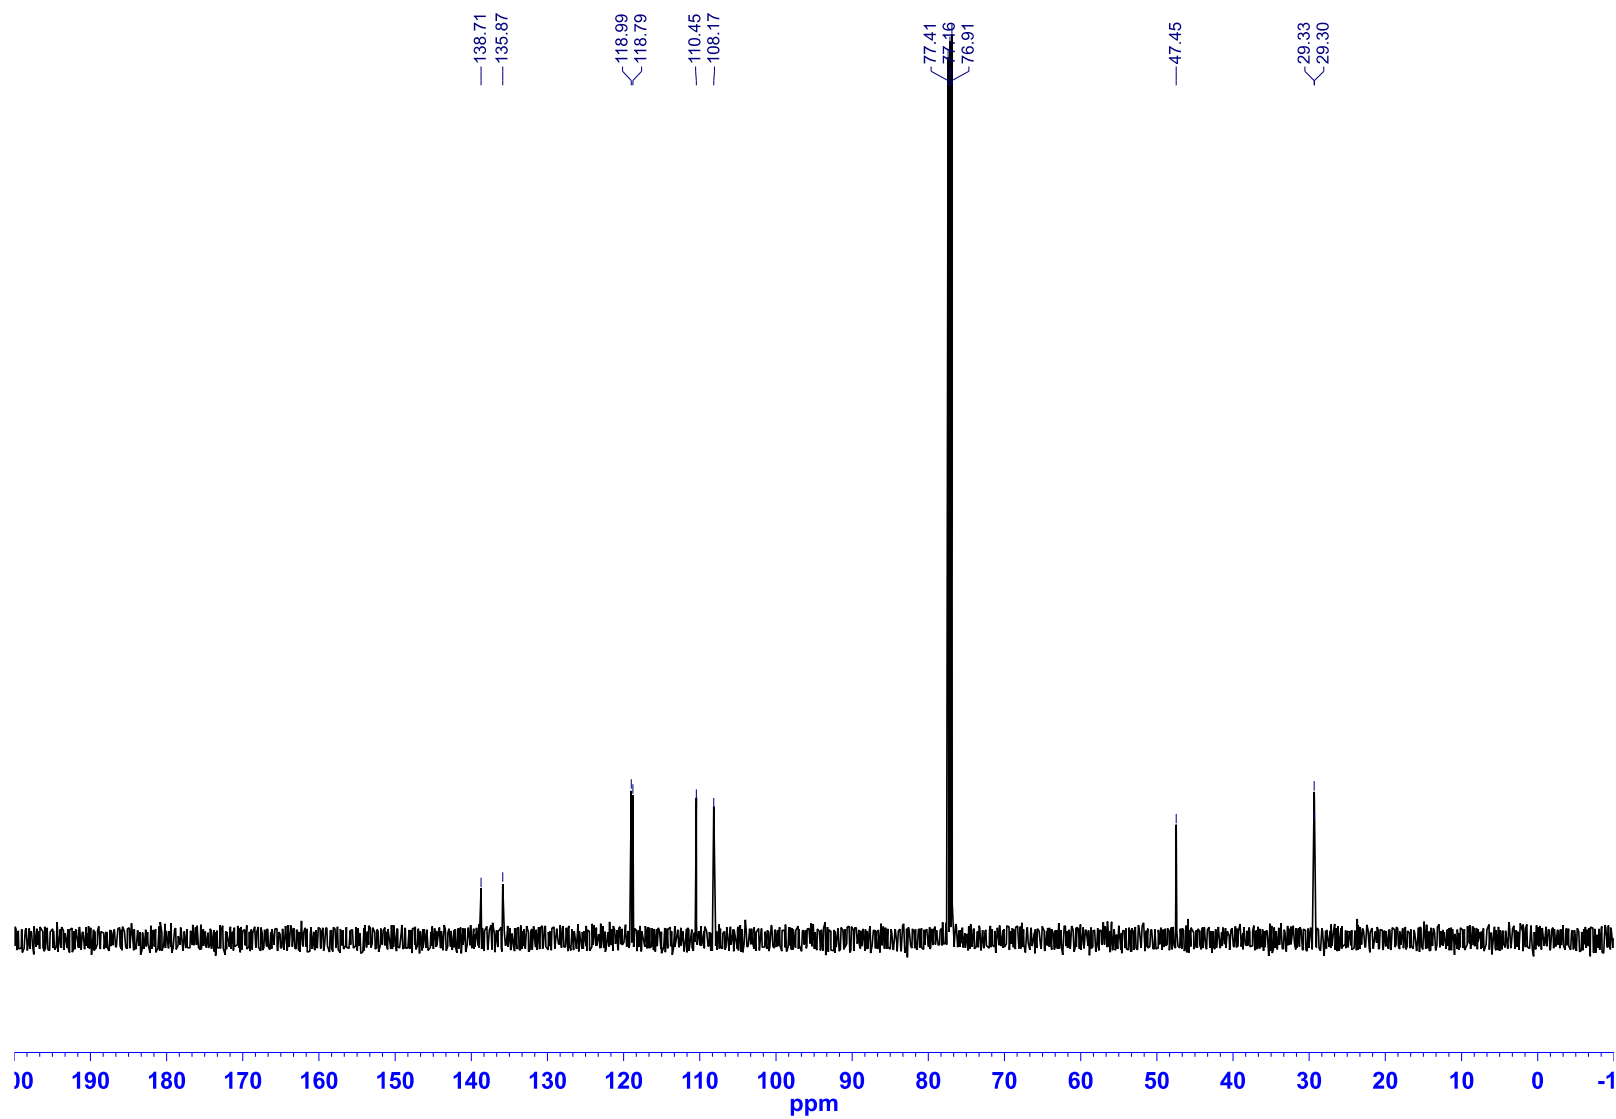

$^{11}\text{B}$  NMR (128.4 MHz,  $\text{CDCl}_3$ ) of 2-(3-chloropropyl)-1-methyl-2,3-dihydro-1*H*-1,3,2-benzodiazaborole (**7g**)

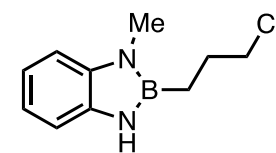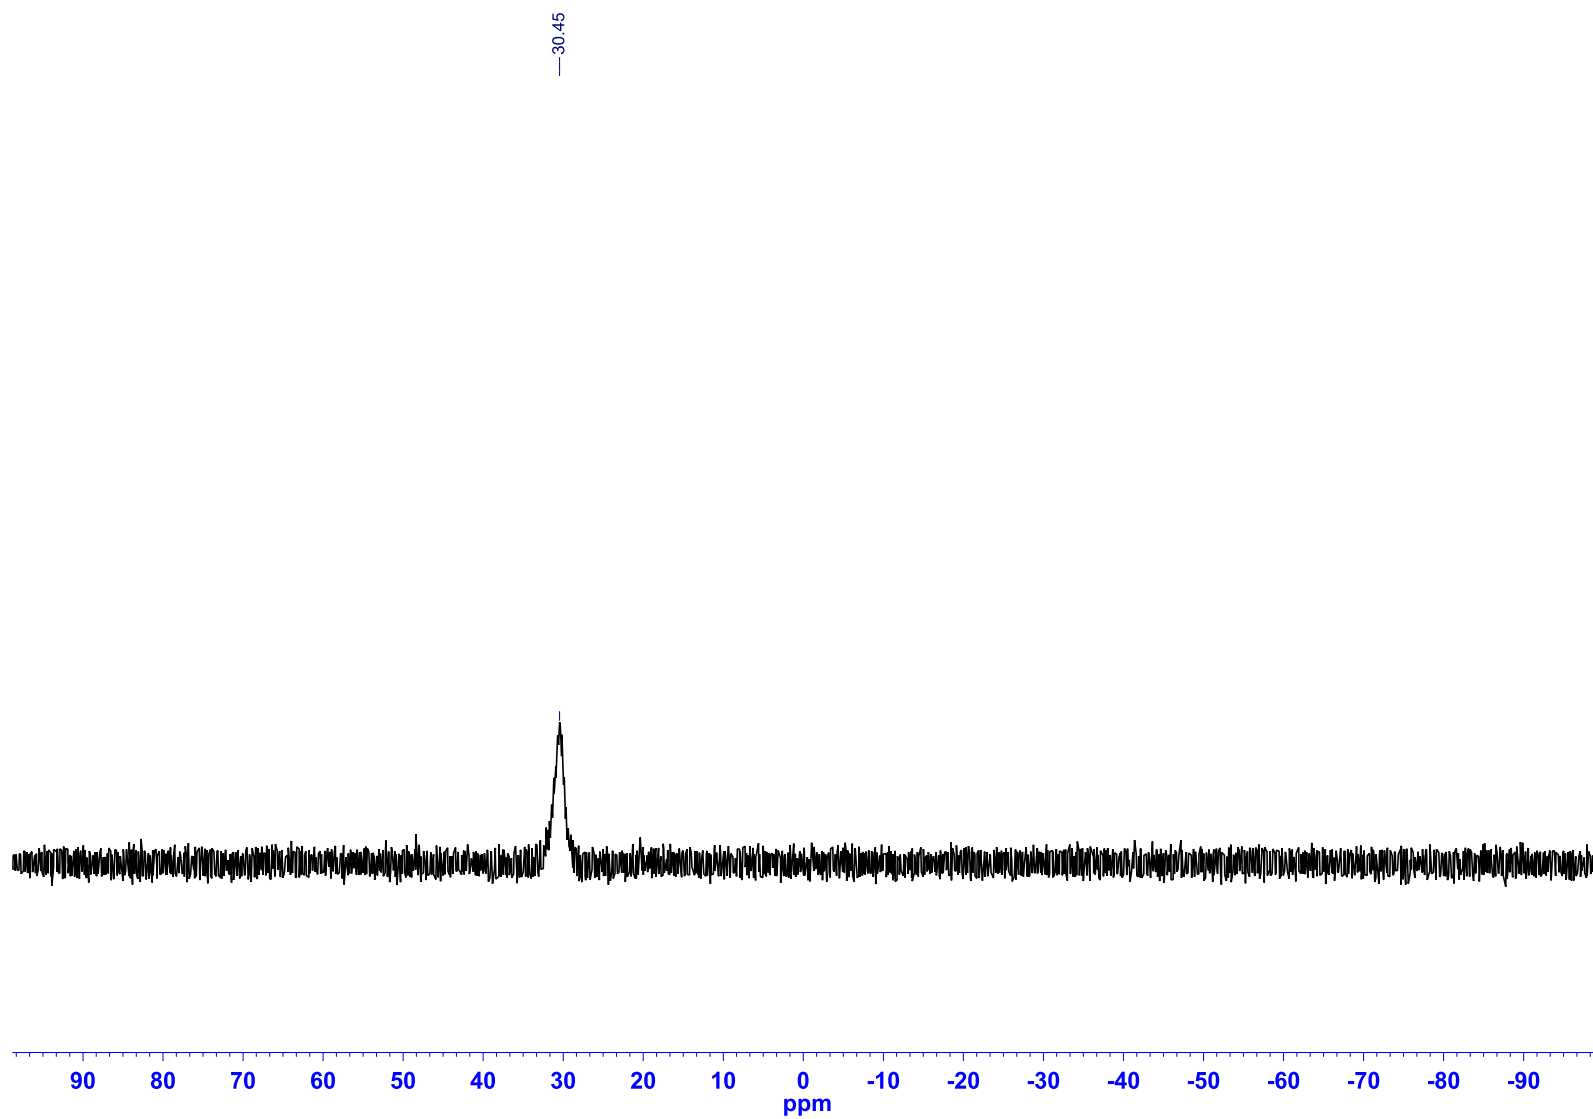

$^1\text{H}$  NMR (500.4 MHz,  $\text{CDCl}_3$ ) of 2-methyl-1-phenyl-2,3-dihydro-1*H*-1,3,2-benzodiazaborole (**7h**)

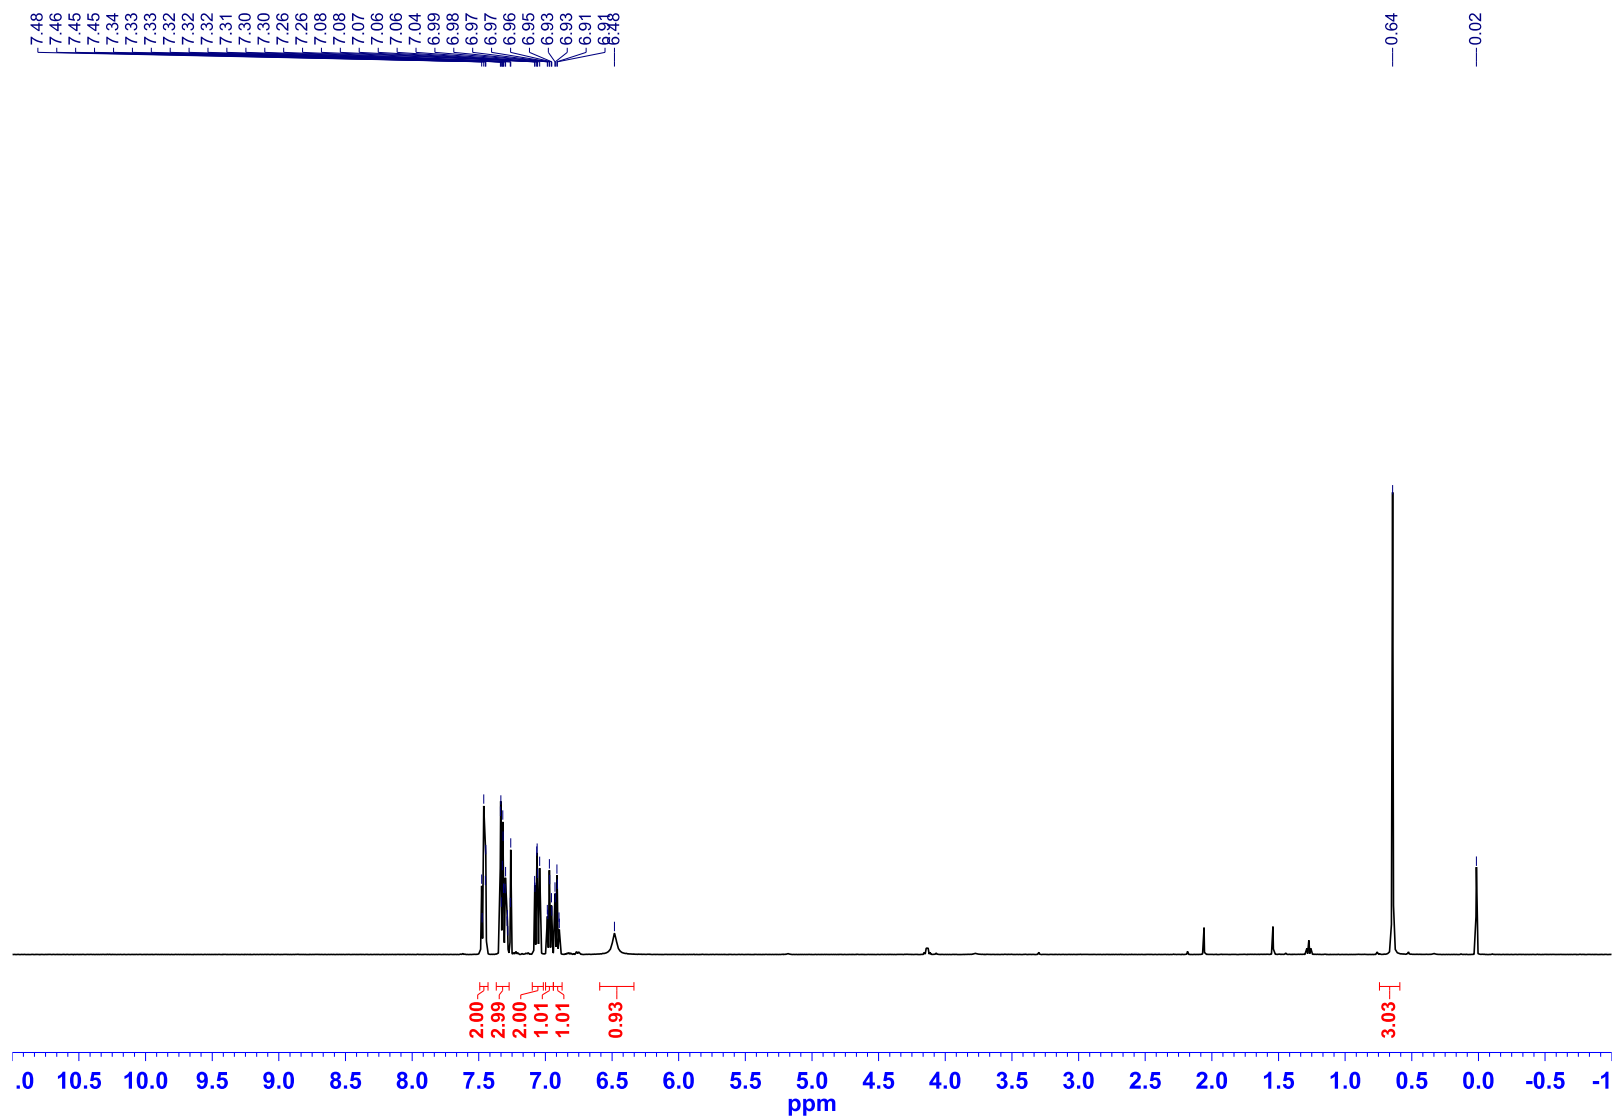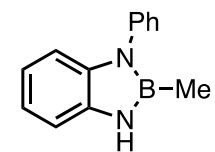

$^{13}\text{C}$  NMR (125.8 MHz,  $\text{CDCl}_3$ ) of 2-methyl-1-phenyl-2,3-dihydro-1*H*-1,3,2-benzodiazaborole (**7h**)

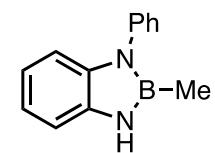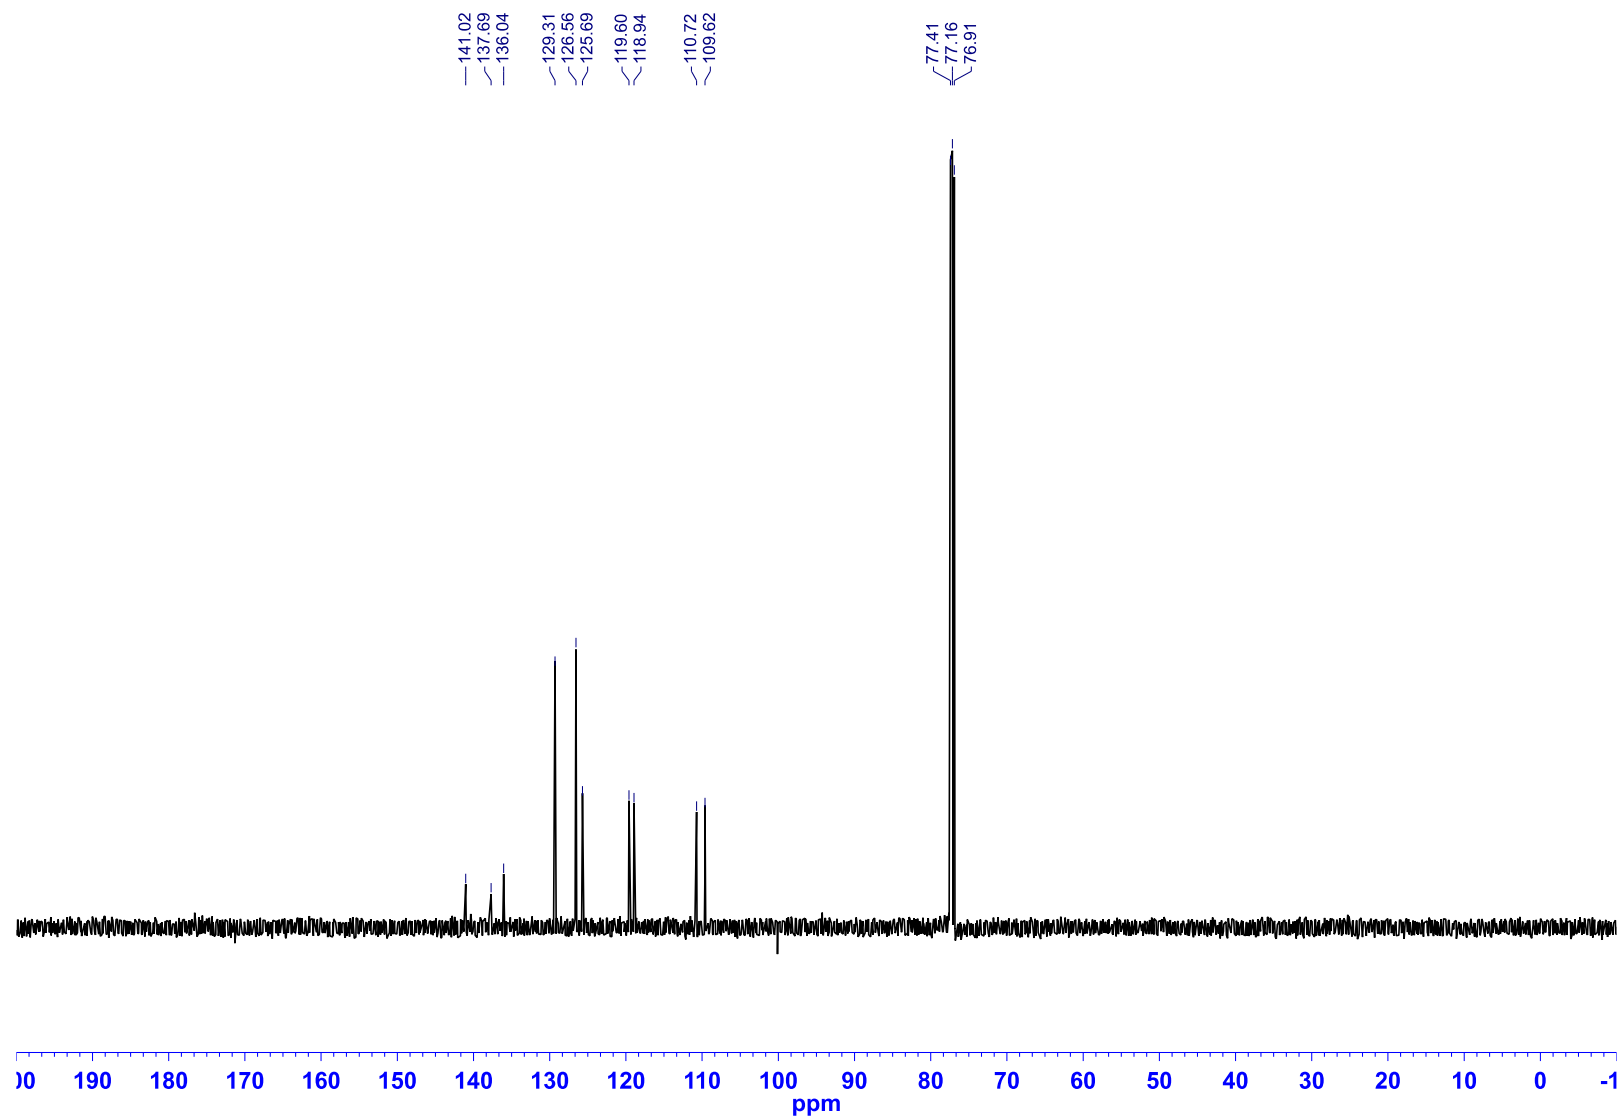

$^{11}\text{B}$  NMR (128.4 MHz, MeCN) of 2-methyl-1-phenyl-2,3-dihydro-1*H*-1,3,2-benzodiazaborole (**7h**)

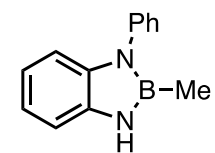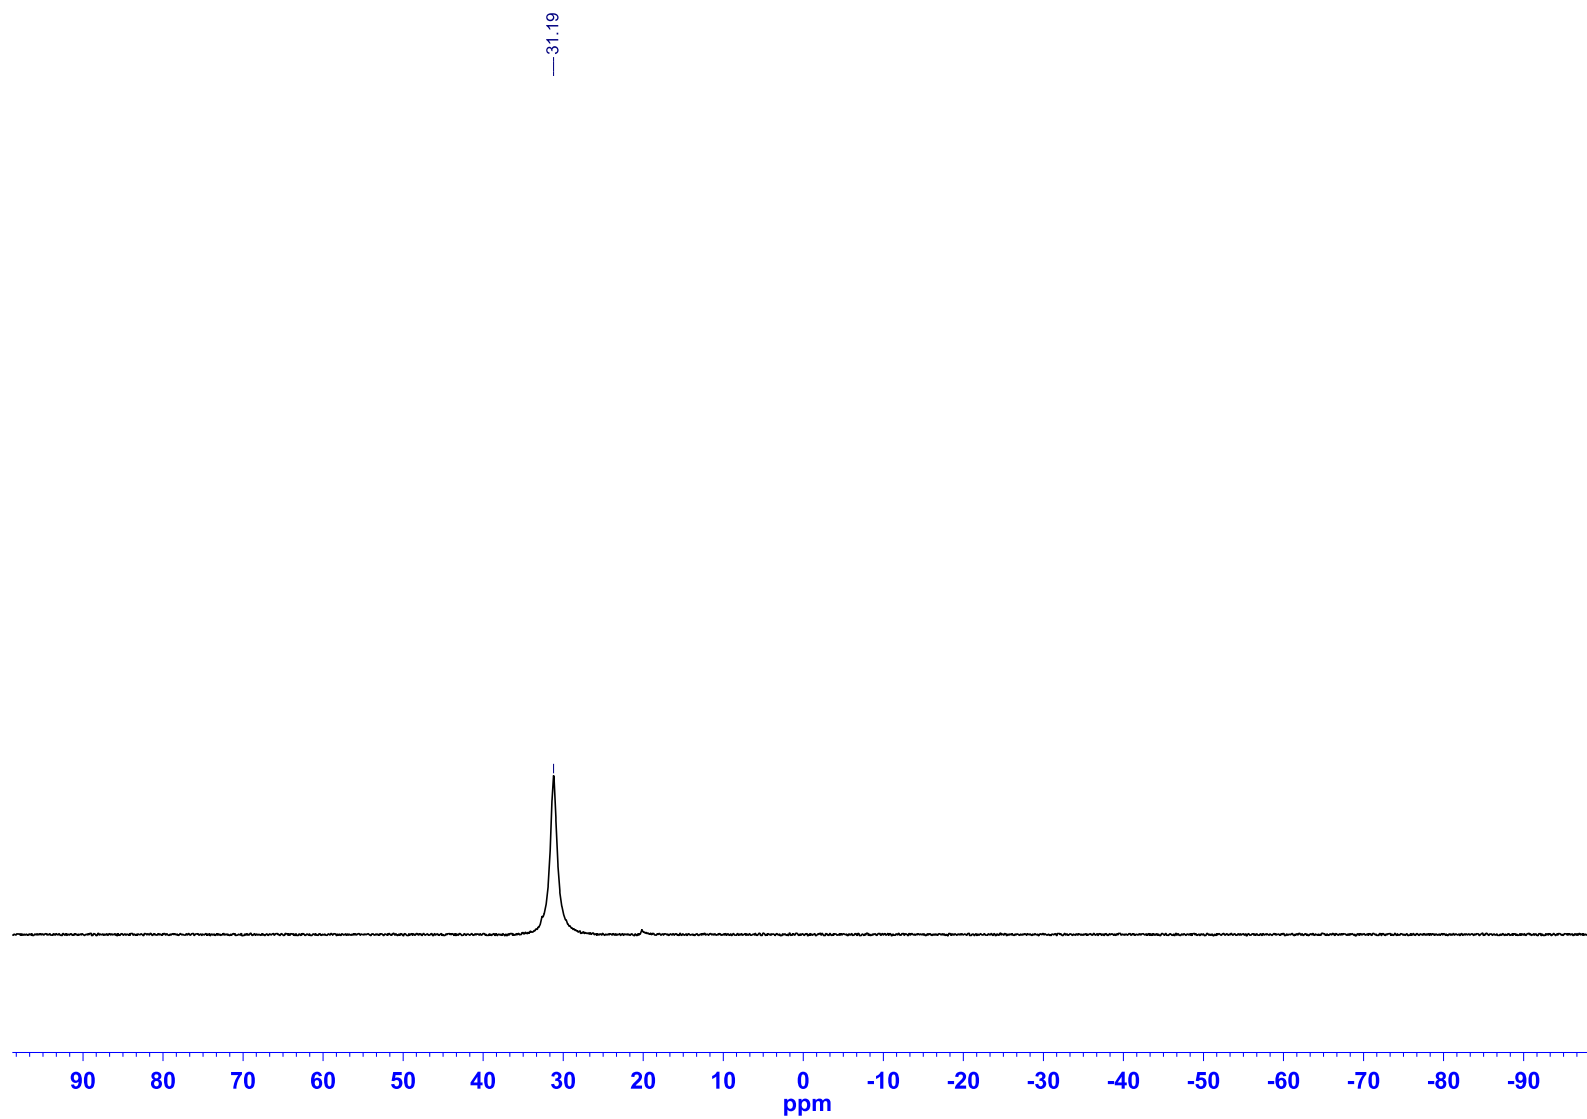

Supplement: jo6b00435_si_001.pdf [file jo6b00435_si_001.pdf]
